# Supplementary material
Source: PubMed Central journal article supplement (PMC5441726)
Supplement: pnas.1620191114.sapp.pdf [file pnas.1620191114.sapp.pdf]

## Supporting Information

### **Deciphering the sugar biosynthetic pathway and tailoring steps of nucleoside antibiotic A201A unveils a GDP-L-galactose mutase**

Qinghua Zhu<sup>a,1</sup>, Qi Chen<sup>a,1</sup>, Yongxiang Song<sup>a</sup>, Hongbo Huang<sup>a</sup>, Jun Li<sup>a</sup>, Junying Ma<sup>a</sup>, Qinglian Li<sup>a</sup>, and Jianhua Ju<sup>a,b,2</sup>

<sup>a</sup>Chinese Academy of Sciences (CAS) Key Laboratory of Tropical Marine Bioresources and Ecology, Guangdong Key Laboratory of Marine Materia Medica, Research Network for Applied Microbiology Center for Marine Microbiology, South China Sea Institute of Oceanology, CAS, Guangzhou 510301, China; and <sup>b</sup>College of Earth Sciences, University of Chinese Academy of Sciences, Beijing 10049, China

Author contributions: J.J. designed research; Q.Z., Q.C., Y.S., H.H. and J.L. performed research; J.M., Q.L., and J.J. analyzed data; and Q.Z., Q.C. and J.J. wrote the paper.

<sup>1</sup>Q.Z. and Q.C. contributed equally to this research.

<sup>2</sup>To whom correspondence should be addressed. E-mail: [jjj@scsio.ac.cn](mailto:jjj@scsio.ac.cn)

## Table of Contents

**Materials and Methods**

**Supplementary Tables [S1–S11](#)**

**Supplementary Figures [S1–S91](#)**

**Supplementary References**

## Materials and Methods

### 1. General Experimental Procedures.

Bacterial strains and plasmids used in this work are listed in [Table S2](#). *E. coli* strains were grown on LB medium at 28 °C or 37 °C; the medium was supplemented with kanamycin (Kan), ampicillin, chloromycetin or apramycin (Apr) when necessary. *M. thermotolerans* SCSIO 00652 was cultured on the modified ISP4 medium (M-ISP4, ISP4 medium supplemented with 0.05 % yeast extract, 0.1 % tryptone and 3 % sea salt) plates at 28 °C. Tryptic Soy Broth (TSB) broth was adapted for the spore suspension of *M. thermotolerans* SCSIO 0652; *Streptomyces lividans* TK64 were propagated on SMA medium (soybean flour 2 %, mannitol 2 %, agar 2 %). For heterologous production of A201A, *S. lividans* TK64 mutants were grown in M-ISP4 medium.

Primers were synthesized at Sangon Biotech Company (Shanghai, China). EasyTaq™ DNA Polymerase, TransStart™ Fast-Pfu DNA Polymerase for polymerase chain reactions (PCR) were purchased from TransGen Biotech Company (Beijing, China). DNA Sequencing was accomplished at Beijing Genomics Institute (BGI) (Shenzhen, China). Restriction enzymes and DNA ligase were purchased from Takara Biotechnology Co. Ltd. (Dalian, China). Plasmid, gel extraction and cycle-pure kits were acquired from Omega Bioteck Inc. (GA, USA).

1-<sup>13</sup>C-labeled D-mannose was purchased from Cambridge Isotope Laboratories Inc. (Hong Kong, China). L-galactose and GDP- $\alpha$ -D-mannose were purchased from Sigma-Aldrich (St. Louis, USA). GDP- $\beta$ -L-galactose was purchased from Carbosynth Limited (Compton, UK). Other chemical solvents (analytical grade) were all purchased from standard commercial sources.

<sup>1</sup>H, <sup>13</sup>C, and 2D (COSY, HMQC, HMBC and NOESY) NMR spectra were recorded at 25 °C with an Avance 500 MHz spectrometer instruments (Bruker). Low resolution and high resolution mass spectra were obtained with an Amazon SL ion trap instrument and a Maxis quadrupole-time-of-flight mass spectrometer (Bruker), respectively. Optical rotations were obtained with an MCP-500 polarimeter (Anton Paar).

Unless otherwise stated, the solvent system of analytical and semi-preparative HPLC consisted of solvent A (0.1 % AcOH and 15 % CH<sub>3</sub>CN in ddH<sub>2</sub>O) and solvent B (0.1 % AcOH and 85 % CH<sub>3</sub>CN in ddH<sub>2</sub>O). To analyze the metabolite profiles of *M. thermotolerans* SCSIO 00652, *S. lividans* TK64, and their mutants or engineered strains, the analytical HPLC program was carried out using a 210 solvent delivery module and a 335 photodiode array detector (Varian). Analytical HPLC was performed with a Phenomenex Prodigy ODS (150×4.60 mm, 5 μm) eluted with a linear gradient of 0 % to 70 % solvent B over 20 min, followed by 70 % to 100 % solvent B in 1 min, and then eluted with 100 % solvent B in 5 min, at a flow rate of 1.0 mL/min using UV detection at both 215 nm and 275 nm.

Semi-preparative HPLC was accomplished with a Hitachi Model D2000 Elite Chromatography Data Station (Hitachi, Japan) equipped with the Hitachi pump and diode array detector, using an YMC-Pack ODS column (YMC, 250×10 mm, 5 μm). Samples were eluted at 2.0 mL/min with a linear gradient from 40 % to 80 % solvent B for 20 min, 80 % to 100 % solvent B for 2 min, followed by holding at 100 % B for 5 min, and then eluted with 100 % solvent A for 3 min; UV detection was at both 215 nm and 275 nm.

## **2. Genomic Library Screening and Annotation of open reading frames.**

We had already constructed the genomic library of *M. thermotolerans* SCSIO 00652 using the SuperCos1 vector (1, 2). The annotation of open reading frames (orfs) and predictions of their functions were accomplished using the orf finder program (<http://www.ncbi.nlm.nih.gov/gorf/gorf.html>), FramePlot 4.0 beta program (<http://nocardia.nih.go.jp/fp4/>), and Blast program (<http://blast.ncbi.nlm.nih.gov/>). A pair of primers mtdMF and mtdMR (Table S3) was designed and used for library screening. The positive clones were further validated with the other two pairs of primers (Table S3). In the end, 9 overlapping positive cosmids, designated 47A, 81A, 142H, 147B, 1912A, 191B, 184D, 49C and 209A, were screened.



### 3. Heterologous Expression of Cosmid 142H in *Streptomyces lividans* TK64.

Cosmid 142H harboring the whole sequence from *mtdC* to *orf3* was selected for heterologous expression. This cosmid was suffered from  $\lambda$ -RED-mediated recombination by replacing the kanamycin resistance gene within the SuperCos1 vector with a fragment excised from our modified pSET152AB vector containing the apramycin resistance gene and elements necessary for conjugation and site specific recombination (*oriT*, integrase gene and  $\phi$ C31 site) (3). The resulting cosmid, termed 142H-pSET152AB was transferred into *E. coli* ET12567/pUZ8002 and then introduced into *S. lividans* TK64 via conjugation to generate the *S. lividans* TK64/142H strain. The engineered strain *S. lividans* TK64/142H was fermented using the same medium as that of wild-type *M. thermotolerans* SCSIO 00652.

### 4. Gene Inactivations.

We have developed a genetic system for *M. thermotolerans* SCSIO 00652 using the  $\lambda$ -RED mediated PCR-targeting mutagenesis method (1, 2). Primers designed for inactivation of each gene are listed in Table S4. Cosmids 142H, 49C, and 1912A and were each transformed into *E. coli* BW25113/pIJ790 for gene inactivations. Gene disruption cassette *aac(3)IV-oriT* was amplified using a fragment from plasmid pIJ773 that was digested with *EcoRI* and *HindIII*. PCR products of *aac(3)IV-oriT* cassette for each disrupted gene were electro-transformed into *E. coli* BW25113/pIJ790 containing one of the above cosmids for  $\lambda$ -RED-mediated recombination to yield recombinant cosmids pJu3003~pJu3020. These recombinant cosmids were transformed into *E. coli* ET12567/pUZ8002, and suffered from conjugation with *M. thermotolerans* SCSIO 00652 wild strain. Double crossover mutants were first selected on the basis of the Kanamycin<sup>S</sup>Apr<sup>R</sup> phenotype and then further confirmed by PCR using primers listed in Table S5 (for gel analysis, see Fig. S1–S18). Finally, the 18 mutant strains of *M. thermotolerans* SCSIO

00652,  $\Delta mtdB$ ,  $\Delta mtdC$ ,  $\Delta mtdD$ ,  $\Delta mtdM_1$ ,  $\Delta mtdH$ ,  $\Delta mtdG_1$ ,  $\Delta mtdJ$ ,  $\Delta mtdK$ ,  $\Delta mtdL$ ,  $\Delta mtdM$ ,  $\Delta mtdG_2$ ,  $\Delta mtdM_2$ ,  $\Delta mtdM_3$ ,  $\Delta mtdW$ ,  $\Delta mtdM_4$ ,  $\Delta mtdWM_4$ ,  $\Delta orf1$  and  $\Delta orf2$  were generated (Table S6).

## 5. Construction of the $\Delta mtdG_1WM_4$ and $\Delta mtdM_2M_3$ Mutant Strains.

To construct the  $\Delta mtdG_1WM_4$  mutant strain, a three-step PCR-targeting technology via  $\lambda$ -Red-mediated recombination was used (4). The process is shown schematically in Fig.S19. The result of PCR verification of the mutant is shown in Fig. S20.

Firstly, the forward primer WdelAprF (5'- ctcattctcccgatcagggaaagcgcctccgatcgaagACTAGT ATTCCGGGGATCCGTCGACC-3', underlined sequences represent *SpeI* site, small letters represent the 39 nt homologous to the region directly upstream of *mtdW*) and the reverse primer M4delAprR (5'-cgggatctctcacgttccgaccgctatcctggatcgcACTAGTTGTAGGCTGGAGCTGCTTC -3', underlined sequences represent *SpeI* site, small letters represent the 39 nt homologous to the region directly downstream of *mtdM<sub>4</sub>*) were used to amplify the *acc(3)IV-oriT* resistance cassette from plasmid pIJ773 that had been digested with *EcoRI-HindIII*. The PCR product was used to replace the dual *mtdWM<sub>4</sub>* genes in the 142H cosmid, which had no *SpeI* recognition sites, to generate cosmid pJu3021. For excision of the resistance cassette, pJu3021 was digested with *SpeI* to delete the *acc(3)IV-oriT* fragment and self-ligated by T4 ligase overnight at 14 °C then ligation products were transformed into *E. coli* DH 5 $\alpha$  and grown overnight on LB plates (with Amp and Kan) at 37 °C. The clones with Apr<sup>S</sup>Kan<sup>R</sup> phenotype were analyzed by restriction enzyme digestion and gel electrophoresis, then confirmed by amplifying a ~657 bp fragment using primers WtF2 (5'-GAGGATCTGGCTGACGGTAC-3') and M4tR (5'-GGAAGTTCTTGGTCCC GTCG-3'). The generated mutant cosmid was designated as pJu3022.

Secondly, another set of primers was designed, being pIJ773forw (5'-CAAGAGACAGGAT GAGGATCGTTTCGCATGATTCCGGGGATCCGTCGACC-3') and pIJ773rev (5'-CGGTCATTT

CGAACCCCAGAGTCCCGCTCATGTAGGCTGGAGCTGCTTC-3'; for each primer the sequences underlined are homologous to the kanamycin resistance sequence in SuperCos 1 vector). This pair of primers was used to amplify the *acc(3)IV-oriT* cassette. The amplified PCR product was transformed into *E. coli* BW25113/pIJ790 harboring pJu3022 for  $\lambda$ -RED mediated recombination to replace the kanamycin resistance sequence to generate pJu3023. Mutant cosmid pJu3023 was transformed into *E. coli* ET12567/pUZ8002 and conjugated with *M. thermotolerans* SCSIO 00652 wild-type as described. Single-crossover exconjugates showing apramycin resistance were first selected. The single-crossover mutants were cultured for further recombination with no antibiotic addition. The apramycin sensitive strains were then selected as a mixture of double-crossover mutants and strains back to wild-type, which could be further differentiated by PCR using primers WtF2 and M4tR and *SpeI* digestion of the PCR fragment. The mutant clones of Ju3023, in which *mtdWM<sub>4</sub>* dual genes were in-frame deleted were thus selected.

Thirdly, gene *mtdG<sub>1</sub>* was replaced by the *aac(3)IV-oriT* fragment from pJu3022 using primers G1dF and G1dR (Table S4) to generate cosmid pJu3024. Mutant cosmid pJu3024 was transformed into *E. coli* ET12567/pUZ8002 and conjugated with mutant Ju3023 spores as described. Single-crossover mutants with the Kan<sup>R</sup>Apr<sup>R</sup> phenotype were cultured on modified-ISP4 plates successively for four generations and double-crossover mutants Ju3024 were then selected from the Kan<sup>S</sup>Apr<sup>R</sup> phenotype. The mutant clones of Ju3024, in which *mtdWM<sub>4</sub>* dual genes were in-frame deleted and *mtdG<sub>1</sub>* was replaced by *aac(3)IV-oriT* fragment were further confirmed by PCR using primers G1tF and G1tR (Fig. S20).

The procedure used to construct  $\Delta$ *mtdM<sub>2</sub>M<sub>3</sub>* mutant is similar as above for the  $\Delta$ *mtdG<sub>1</sub>WM<sub>4</sub>* mutant. Finally, the *mtdM<sub>2</sub>* gene was in-frame deleted and *mtdM<sub>3</sub>* was replaced with the *aac(3)IV-oriT* resistance cassette to yield the  $\Delta$ *mtdM<sub>2</sub>M<sub>3</sub>* mutant (Ju3025), which was confirmed by PCR (Fig. S21).

## 6. Large Scale Fermentation, Isolation and Structural Elucidation of Metabolites 2–11 from *M. thermotolerans* Mutant Strains.

To isolate the A201A congeners from the mutants, a two-step fermentation process was adopted. A general procedure was described herein. First, a suitable portion of spore and mycelium (~1 cm<sup>2</sup>) from solid M-ISP4 medium plate was used to inoculate 50 mL M-ISP4 medium in a 250-mL flask as a seed culture; the flask was cultured at 28 °C and 200 rpm for 36 h. Then, the seed culture (50 mL) was transferred to 200 mL M-ISP4 medium in a 1000 mL flask; the flask was cultured at 28 °C and 200 rpm for an additional 7–9 d. Multiple flasks were used. At last, the culture broth was centrifuged to yield a supernatant and a mycelium cake. The supernatant was extracted by equal volume of butanone three times and evaporated to dryness; the mycelium was extracted with 1.5 L acetone three times and evaporated to dryness; the two organic extracts were combined to yield a residue. The residue was dissolved in a 1:1 mixture of CHCl<sub>3</sub>-MeOH and mixed with an appropriate amount of silica gel for normal phase silica gel column chromatography, eluted with a gradient elution of CHCl<sub>3</sub>/MeOH mixture from 100/0, 98/2, 96/4, 94/6, 92/8, 90/10, 80/20 and 50/50 to yield eight fractions (Fr. A1-Fr. A8). The fractions were each analyzed by HPLC-UV. The fraction/s that contain/s the corresponding target compound was/were evaporated to dryness and subjected to another normal phase silica gel column chromatography, eluted with a gradient elution of EtOAc/MeOH mixture from 100/0, 95/5, 9/1, 85/15, and 8/2 to yield five fractions (Fr. B1- Fr. B5).

The fraction containing the targeted compound as judged by HPLC analysis was dissolved in MeOH, filtered with a 0.45 micron filtration membrane, and finally purified by semi-preparative HPLC to give compounds **2** (15 mg) from an 8-L scale fermentation of  $\Delta mtdM$  mutant, **3** (2 mg) from a 24-L scale fermentation of  $\Delta mtdG_1WM_4$  mutant, **4** (12 mg) from an 8-L scale fermentation of  $\Delta mtdJ$  mutant, **5** (15 mg) from an 8-L scale fermentation of  $\Delta mtdH$  mutant, **6** (2 mg) from an

8-L scale fermentation of  $\Delta mtdM_1$  mutant, **7** (11 mg) from an 8-L scale fermentation of  $\Delta mtdM_2$  mutant, **8** (12 mg) from an 8-L scale fermentation of  $\Delta mtdM_3$  mutant, **9** (8 mg) from an 8-L scale fermentation of  $\Delta mtdW$  mutant, **10** (7 mg) from an 8-L scale fermentation of  $\Delta mtdWM_4$  mutant, and **11** (2 mg) from an 8-L scale fermentation of  $\Delta mtdM_2M_3$  mutant, respectively.

### Physicochemical Properties and Structure Elucidation of Compounds 2–11.

Compound **2** (from  $\Delta mtdK$ ,  $\Delta mtdL$ ,  $\Delta mtdM$  or  $\Delta mtdG_2$  mutant) had a molecular formula of  $C_{22}H_{26}N_6O_5$ , as determined by HRESIMS. The  $^1H$  and  $^{13}C$  NMR spectroscopic data of **2** indicated that the signals for the rhamnose and hexofuranose units of the parent compound A201A (**1**) were missing in **2**. The MS,  $^1H$  and  $^{13}C$  NMR spectroscopic data of **2** are fully consistent with the hydrolysis product of **1** in the literature (**5**). Thus, the structure of **2** was established.

**Compound 2** (from  $\Delta mtdK$ ,  $\Delta mtdL$ ,  $\Delta mtdM$  or  $\Delta mtdG_2$  mutant): white solid; UV (MeOH)  $\lambda_{max}$  (log  $\epsilon$ ) 219 (4.20), 283 (4.34) nm;  $^1H$  (500 MHz,  $CD_3OD$ ) and  $^{13}C$  NMR (125 MHz,  $CD_3OD$ ), spectra see [Table S8](#); (+)-HRESIMS  $m/z$  455.2069 (calcd. for  $C_{22}H_{27}N_6O_5$ , 455.2037); NMR spectra, see [Figs. S37 and S38](#).

Compound **3** (from  $\Delta mtdG_1WM_4$  mutant strain) had a molecular formula of  $C_{28}H_{36}N_6O_{10}$  as provided by HRESIMS, corresponding to a hexose unit (162 Da) attached to **2**. Analysis of the  $^1H$ , COSY, HSQC, and HMBC NMR data of **3** allowed full assignment of the NMR signals of **3**. The HMBC correlations from H-1' (5.60) to C-4 (156.2) of the *p*-hydroxy- $\alpha$ -methylcinnamic acid moiety, and C-4' (83.9) of the hexose moiety, and from H-4' (3.85) to C-1' (100.3) confirmed that the sugar unit is in furanose form attached to C-4 of the cinnamic acid moiety. The HPLC-UV-MS patterns of the two samples were fully in agreement. Hence, the hexanose unit in **3** was determined to be L-galactofuranose (see 7. Absolute Stereochemistry of the Galactose in Compound **3**).

**Compound 3** (from  $\Delta mtdG_1 WM_4$  mutant): white solid;  $^1\text{H}$  and  $^{13}\text{C}$  NMR data, see [Table S8](#); (+)-HRESIMS  $m/z$  617.2562 (calcd. for  $\text{C}_{28}\text{H}_{37}\text{N}_6\text{O}_{10}$ , 617.2566); NMR spectra, see [Figs. S39–S43](#).

Compound **4** (from  $\Delta mtdG_1$  or  $\Delta mtdJ$  mutant) had the molecular formula of  $\text{C}_{29}\text{H}_{36}\text{N}_6\text{O}_{10}$ , which was established by HRESIMS. The  $^1\text{H}$  and  $^{13}\text{C}$  NMR spectra for **4** showed less signals than those for A201A. Detailed comparison of the 1D NMR spectroscopic data of **4** with those of A201A revealed that these signals ascribed to the rhamnose moiety were absent in **4**, suggesting that the rhamnose was missing in **4**. The  $^1\text{H}$  and  $^{13}\text{C}$  NMR spectroscopic data of **4** were identical with those reported in literature as the minor product A201D (**5**). Thus, compound **4** was identified as A201D.

**Compound 4** (from  $\Delta mtdG_1$  or  $\Delta mtdJ$  mutant): white solid;  $[\alpha]_D^{25} = -171$  ( $c = 0.10$ , MeOH); UV (MeOH)  $\lambda_{\text{max}}$  ( $\log \epsilon$ ) 218 (4.24), 281 (4.35) nm;  $^1\text{H}$  and  $^{13}\text{C}$  NMR data, see [Table S9](#); (+)-HRESIMS  $m/z$  629.2565 (calcd. for  $\text{C}_{29}\text{H}_{37}\text{N}_6\text{O}_{10}$ , 629.2560); NMR spectra, see [Figs. S44–S45](#).

The molecular formula of compound **5** (from  $\Delta mtdH$  mutant) was determined to be  $\text{C}_{37}\text{H}_{50}\text{N}_6\text{O}_{15}$  on the basis of HRESIMS; **5** therefore was characterized by one more oxygen atom than found in A201A. The  $^1\text{H}$  and  $^{13}\text{C}$  NMR spectra for **5** were similar to those of A201A, except that the signals representative of the methyl in the rhamnose unit (5-Me) were missing, whereas additional signals for one oxygen-bearing methylene ( $\delta_{\text{H}}$  3.84, 3.72;  $\delta_{\text{C}}$  62.5 ppm) were clearly present. Furthermore, the  $^{13}\text{C}$  NMR signal of C-4 in the rhamnose upfield shifted from  $\delta_{\text{C}}$  83 ppm in A201A to  $\delta_{\text{C}}$  77.2 ppm in **5**, and the  $^{13}\text{C}$  NMR chemical resonance of C-5 in the rhamnose downfield shifted from  $\delta_{\text{C}} = 69$  to 73.9 ppm. These changes indicated that the 5-Me in rhamnose was replaced by a hydroxymethyl group. This structural elucidation was further confirmed on the basis of analysis of the  $^1\text{H}$ - $^1\text{H}$  COSY and HMBC spectra of **5** ([Table S9](#)).

**Compound 5** (from  $\Delta mtdH$  mutant): white solid;  $[\alpha]_D^{25} = -107$  ( $c = 0.22$ , MeOH); UV (MeOH)  $\lambda_{max}$  (log  $\epsilon$ ) 217 (4.43), 281 (4.46) nm;  $^1H$  and  $^{13}C$  NMR data, see [Table S9](#); (+)-HRESIMS  $m/z$  819.3435 (calcd. for  $C_{37}H_{51}N_6O_{15}$ , 819.3407); NMR spectra, see [Figs. S46–S50](#).

Compound **6** (from  $\Delta mtdM_1$  mutant) was isolated as a white solid. The molecular formula of **6** was established to be  $C_{35}H_{46}N_6O_{14}$  by HRESIMS, 28 mass units smaller than that of A201A. Careful examination of the  $^1H$  and  $^{13}C$  NMR spectra with those of A201A revealed good similarity, except that the signals for the two methyl groups ( $\delta_H$  3.37,  $\delta_C$  37.7 ppm) of the adenine moiety were missing, indicating the two methyl groups were substituted by hydrogen atoms. The subsequent HMQC and HMBC experiments supported this structural elucidation and allowed the complete assignment of the  $^1H$  and  $^{13}C$  NMR spectroscopic data ([Table S9](#)).

**Compound 6** (from  $\Delta mtdM_1$  mutant): white solid;  $[\alpha]_D^{25} = -106$  ( $c = 0.66$ , MeOH); UV (MeOH)  $\lambda_{max}$  (log  $\epsilon$ ) 215 (4.49), 270 (4.39) nm;  $^1H$  and  $^{13}C$  NMR data, see [Table S9](#); (+)-HRESIMS  $m/z$  775.3152 (calc. for  $C_{35}H_{47}N_6O_{14}$ , 775.3145); NMR spectra, see [Figs. S51–S55](#).

Compounds **7** (from  $\Delta mtdM_2$  mutant) and **8** (from  $\Delta mtdM_3$  mutant) shared the same molecular formula  $C_{36}H_{48}N_6O_{14}$ , which was one  $CH_2$  unit smaller than that of A201A, according to HRESIMS. The  $^1H$  and  $^{13}C$  NMR spectra for **7** and **8** resembled those of A201A, except that one methoxy group signals were missing in **7** and **8**, respectively. Additionally, the  $^1H$  and  $^{13}C$  NMR signals for the rhamnose unit in **7** and **8** were different with those in A201A. The  $^1H$ - $^1H$  COSY correlations of H-1/H-2/H-3/H-4/H-5/H<sub>3</sub>-6 showed the presence of the rhamnose skeleton in both **7** and **8** with the aid of an HMQC experiment. The structural difference of **7** and **8** was only in the location of the methoxy group on the rhamnose. The HMBC correlation from the methoxy protons ( $\delta_H$  3.43 ppm, 3-OMe) to C-3 ( $\delta_C$  82.1 ppm) linked the methoxy at C-3 of the rhamnose in **7**. However, in **8**, the HMBC correlation from the methoxy protons ( $\delta_H$  3.56 ppm, 4-OMe) to C-4 ( $\delta_C$  84.5 ppm) located the methoxy at C-4 on the rhamnose. Thus, the structures of **7** and **8**

were identified. The  $^1\text{H}$  and  $^{13}\text{C}$  NMR spectroscopic data of **7** and **8** were assigned by  $^1\text{H}$ - $^1\text{H}$  COSY, HMQC and HMBC experiments, respectively (Tables S9 and S10).

**Compound 7** (from  $\Delta mtdM_2$  mutant): white solid;  $[\alpha]_D^{25} = -102$  ( $c = 0.20$ , MeOH); UV (MeOH)  $\lambda_{\text{max}}$  (log  $\epsilon$ ) 217 (4.42), 281 (4.45) nm;  $^1\text{H}$  and  $^{13}\text{C}$  NMR data, see Table S9; (+)-HRESIMS  $m/z$  789.3296 (calcd. for  $\text{C}_{36}\text{H}_{49}\text{N}_6\text{O}_{14}$ , 789.3315); NMR spectra, see Figs. S56–S60.

**Compound 8** (from  $\Delta mtdM_3$  mutant): white solid;  $[\alpha]_D^{25} = -212$  ( $c = 0.13$ , MeOH); UV (MeOH)  $\lambda_{\text{max}}$  (log  $\epsilon$ ) 217 (4.84), 279 (4.80) nm;  $^1\text{H}$  and  $^{13}\text{C}$  NMR data, see Table S10; (+)-HRESIMS  $m/z$  789.3312 (calcd. for  $\text{C}_{36}\text{H}_{49}\text{N}_6\text{O}_{14}$ , 789.3315); NMR spectra, see Figs. S61–S65.

The molecular formula of **9** (from  $\Delta mtdW$  mutant) was determined to be  $\text{C}_{37}\text{H}_{52}\text{N}_6\text{O}_{14}$  on the basis of HRESIMS, which has two mass units greater than that of A201A. Comparisons of the  $^1\text{H}$  and  $^{13}\text{C}$  NMR spectroscopic data with those of A201A revealed that the double bond ( $\delta_{\text{C}}$  143.1, 132.0) signals of the hexofuranose moiety were absent, whereas two sets of oxygen-bearing methine signals were observed at  $\delta_{\text{H}}$  3.90,  $\delta_{\text{C}}$  83.5 and  $\delta_{\text{H}}$  3.37,  $\delta_{\text{C}}$  83.0 ppm, indicating that the olefinic bond was saturated in **9**. In the  $^1\text{H}$ - $^1\text{H}$  COSY spectrum, the correlation of the protons at  $\delta_{\text{H}}$  3.90 and 3.37 ppm suggested the presence of X-(O)CH-CH(O)-X' fragment. HMBC correlations from H-4 to C-1, C-3, and from H-5 to C-4, 5-OMe confirmed the saturated hexofuranose unit. Thus, compound **9** has the same structure as the reported A201E, which was previously isolated as a minor product but the stereochemistry of the hexofuranose has not been solved (5). The hexofuranose unit in compound **9** was deduced to be  $\alpha$ -L-galactofuranose as in **3** on the basis of  $^1\text{H}$  and  $^{13}\text{C}$  NMR data comparisons with those of **10** and **3**; considerations of common biosynthetic machineries also support this conclusion.

**Compound 9** (from  $\Delta mtdW$  mutant): white solid;  $[\alpha]_D^{25} = -61$  ( $c = 0.21$ , MeOH); UV (MeOH)  $\lambda_{\text{max}}$  (log  $\epsilon$ ) 216 (4.26), 281 (4.36) nm;  $^1\text{H}$  and  $^{13}\text{C}$  NMR data, see Table S10; (+)-HRESIMS  $m/z$  805.3625 (calcd. for  $\text{C}_{37}\text{H}_{53}\text{N}_6\text{O}_{14}$ , 805.3614); NMR spectra, see Figs. S66–S70.



Compound **10** (from  $\Delta mtdWM_4$  mutant) possessed the molecular formula of  $C_{36}H_{50}N_6O_{14}$ , which was one  $CH_2$  unit smaller than that of **9**, as determined by HRESIMS. The  $^1H$  and  $^{13}C$  NMR spectra of **10** were very similar with those of **9**, except for the absence of the methoxy group signals at  $\delta_H$  3.33,  $\delta_C$  59.7 ppm in **10**. Furthermore, the  $^{13}C$  resonance for C-5 of the hexofuranose unit shifted upfield from  $\delta_C$  83.0 ppm in **10** to  $\delta_C$  72.0 ppm in **9**. These observed changes indicated that the methoxy group at C-5 of the hexofuranose unit was substituted by a hydroxy group. The hexofuranose unit in compound **10** was deduced to be  $\alpha$ -L-galactofuranose as in **3**. The  $^1H$  and  $^{13}C$  NMR spectroscopic data were assigned on the basis of the analysis of HMQC and HMBC spectra (Table S10).

**Compound 10** (from  $\Delta mtdWM_4$  mutant): white solid;  $[\alpha]_D^{25} = -90$  ( $c = 0.11$ , MeOH); UV (MeOH)  $\lambda_{max}$  ( $\log \epsilon$ ) 218 (4.38), 282 (4.50) nm;  $^1H$  and  $^{13}C$  NMR data, see Table S10; (+)-HRESIMS  $m/z$  791.3485 (calcd. for  $C_{36}H_{51}N_6O_{14}$ , 791.3458); NMR spectra, see Figs. S71–S75.

Compound **11** was determined to have the molecular formula  $C_{35}H_{46}N_6O_{14}$  on the basis of HRESIMS, two  $CH_2$  units less than that of **1**. A full set of 1D ( $^1H$  and  $^{13}C$ ) and 2D (COSY, HSQC, and HMBC) NMR data for **11** were acquired, thus allowing for full assignment of the  $^1H$  and  $^{13}C$  signals. In comparison with those of **1**, the two methyl groups within the rhamnose moiety were missing in **11**. Analysis of the HMBC correlations of **11** confirmed this conclusion.

**Compound 11**: white solid;  $[\alpha]_D^{25} = -69$  ( $c = 0.10$ , MeOH);  $^1H$  and  $^{13}C$  NMR data, see Table S10; (+)-HRESIMS  $m/z$  775.3114 (calcd. for  $C_{35}H_{47}N_6O_{14}$   $[M + H]^+$ , 775.3145); NMR spectra, see Figs. S76–S80.

## 7. Absolute Stereochemistry of the Galactose in Compound 3.

Compound **3** (1.0 mg) was dissolved in 1.0 mL of 1 N HCl in 90 % MeOH, and the solution was kept at 80 °C for 12 h in a sealed tube. The reaction mixture was dried under vacuum, and partitioned between  $CHCl_3$  and  $H_2O/MeOH$  (8:2). The aqueous layer was concentrated to

dryness in vacuo, and then benzoylated with 150  $\mu$ L of benzoyl chloride in 1 mL of pyridine at 25  $^{\circ}$ C for 12 h. The reaction was quenched with 1 mL of MeOH. The reaction mixture was dried under vacuum. The residue was subjected to SiO<sub>2</sub> CC and eluted with CHCl<sub>3</sub> to afford fraction A. Fraction A was then purified by HPLC with a phenomenex ODS luna column (150 $\times$ 4.60 mm, 5  $\mu$ m) using an elution system consisting of solvent A (0.1 % HOAc/15 % CH<sub>3</sub>CN in H<sub>2</sub>O) and solvent B (0.1 % HOAc/85 % CH<sub>3</sub>CN in H<sub>2</sub>O). Elution was done at 1 mL/min with a linear gradient from 100 % to 15 % A over the course of 20 min, and from 15 % A to 100 % B over the course of 5 min, then hold for 5 min. The peak at  $t_R$  24 min was gathered and dried by air to give compound **12**. This compound was identified as methyl tetra-*O*-benzoyl- $\alpha$ -L-galactopyranoside on the basis of comparisons of its MS, <sup>1</sup>H-NMR and CD spectrum data with those of **13** (6, 7).

#### **Methyl Tetra-*O*-benzoyl- $\alpha$ -L-galactopyranoside (13).**

3.0 mg of L-galactose was dissolved in 1.5 mL of 1 N HCl in 90 % MeOH, and the solution was kept at 80  $^{\circ}$ C for 12 h in a sealed tube. The reaction mixture was benzoylated as noted above. The residue was subjected to HPLC purification using the same conditions as described above to yield compound **13**. HR-ESI-MS ( $m/z$ ) 611.1909 ([M + H]<sup>+</sup>, calcd for 611.1912, C<sub>35</sub>H<sub>31</sub>O<sub>10</sub>). <sup>1</sup>H NMR (CDCl<sub>3</sub>):  $\delta$  = 8.10 (2H, d, 8.0, benzoyl proton), 8.03 (2H, d, 8.0 Hz, benzoyl proton), 7.99 (2H, d, 8.0 Hz, benzoyl proton), 7.79 (2H, d, 8.0 Hz, benzoyl proton), 7.62-7.24 (12H, overlapping signals, benzoyl proton), 6.04 (1H, d, 3.3 Hz, H-4), 6.01 (1H, dd, 10.8 and 3.3 Hz, H-3), 5.69 (1H, dd, 10.8 and 3.5 Hz, H-2), 5.33 (1H, d, 3.5 Hz, H-1), 4.62 (2H, overlapping signals, H-5 and H-6a), 4.41 (1H, dd, 8.8 and 8.8 Hz, H-6b), 3.49 (3H, s, OMe) ppm. CD spectrum see [Fig. S27](#).

#### **Methyl Tetra-*O*-benzoyl- $\alpha$ -D-galactopyranoside (14).**

5.0 mg of D-galactose was subjected to acidic methanolysis followed by benzoylation as described above. HPLC purification using the same conditions as above described to attain pure **14**. HR-ESI-MS ( $m/z$ ) 611.1902 ([M + H]<sup>+</sup>, calcd for 611.1912, C<sub>35</sub>H<sub>31</sub>O<sub>10</sub>). <sup>1</sup>H NMR (CDCl<sub>3</sub>):

$\delta$  = 8.10 (2H, d, 8.0, benzoyl proton), 8.03 (2H, d, 8.0 Hz, benzoyl proton), 7.99 (2H, d, 8.0 Hz, benzoyl proton), 7.80 (2H, d, 8.0 Hz, benzoyl proton), 7.63-7.25 (12H, overlapping signals, benzoyl proton), 6.03 (1H, d, 3.3 Hz, H-4), 6.01 (1H, dd, 10.7 and 3.3 Hz, H-3), 5.70 (1H, dd, 10.7 and 3.5 Hz, H-2), 5.33 (1H, d, 3.5 Hz, H-1), 4.62 (2H, overlapping signals, H-5 and H-6a), 4.43 (1H, dd, 8.8 and 8.8 Hz, H-6b), 3.49 (3H, s, OMe) ppm. CD spectrum see [Fig. S27](#).

#### **8. Feeding Experiment with [1-<sup>13</sup>C] D-mannose into *M. thermotolerans* SCSIO 00652 and Purification of <sup>13</sup>C Enriched A201A.**

A two-step fermentation process was adopted for the production of A201A. A volume of 100  $\mu$ L spores of *M. thermotolerans* SCSIO 00652 was inoculated into a 250 mL Erlenmeyer flask containing 50 mL M-ISP4 medium (three flasks were used); the flasks were incubated at 28 °C, 200 rpm on the rotary shaker for 36 h. Then, each of the 50 mL seed cultures was transferred into each of the three 1000 mL Erlenmeyer flask each containing 200 mL M-ISP4 medium; the three flasks were incubated at 28 °C, 200 rpm on the rotary shaker for another 24 h. Subsequently, 200 mg of [1-<sup>13</sup>C] D-mannose were added to each of the three flasks. After an additional 7 d of cultivation at 28 °C, 200 rpm, the fermentation broth (0.75 L) was centrifuged to yield a supernatant and a mycelium cake. The supernatant was extracted with 0.75 L butanone three times; the mycelium was extracted with 0.5 L acetone three times. Both organic extracts were evaporated to dryness and combined to yield a residue. The residue was dissolved in a 1:1 mixture of CHCl<sub>3</sub>-MeOH and mixed with an appropriate amount of silica gel for normal phase silica gel column chromatography, eluted with a gradient elution of CHCl<sub>3</sub>/MeOH mixture from 100/0, 98/2, 96/4, 94/6, 92/8 and 90/10 to yield six fractions (Fr.1-Fr.6). Fr.6 was dissolved in MeOH and filtered with a 0.45 micron filtration membrane and purified by semi-preparative HPLC to give <sup>13</sup>C-enriched A201A (**1**) (~0.6 mg) and then subjected to <sup>13</sup>C NMR data acquisition ([Figs. S84 and S85](#)).

## 9. Overexpression and Purification of MtdM and MtdL.

Overexpression of *mtdM* and *mtdL* in *E.coli* BL21 (DE3) is described below. The *mtdM* was PCR-amplified from cosmid 142H with primer pairs of MtdMexpF (CATATGTCAACAGGAA TCAAACGCGC, the underlined sequences represent *NdeI* site) and MtdMexpR (ACTAGTAAAGCTTTCACGGCCGGACATGCGGCT, the underlined sequences represent *HindIII* site); the *mtdL* was PCR-amplified from cosmid 142H with primer pairs of MtdLexpF (CATATGTCCGGCCGTGACATCTCGAC, the underlined sequences represent *NdeI* site) and MtdLexpR (GGATCCTCACGTTCCCGCCACCGTG, the underlined sequences represent *BamHI* site). The PCR products of *mtdM* and *mtdL* were each recovered from agarose gel with a gel extraction kit, modified by way of extension using EasyTaq DNA polymerase at 72 °C for 20 min, recycled by cycle-pure kit, ligated into pCR 2.1 TA cloning vector, and finally confirmed by DNA sequencing. The corresponding fragments were then excised from pCR 2.1/*mtdM* with *NdeI/BamHI* and pCR 2.1/*mtdL* with *NdeI/HindIII* and cloned into the same site of pET/28a(+) vector to yield plasmids pET28a(+)/*mtdM* and pET28a(+)/*mtdL*, which were transformed into *E. coli* BL21(DE3) to yield strains *E.coli* BL21(DE3)/pET28a(+)/*mtdM* and *E.coli* BL21(DE3)/pET28a(+)/*mtdL* for protein expression, respectively.

Each of the above two strains was cultured at 28 °C and 200 rpm to OD<sub>600</sub>=0.6. Isopropyl β-D-1-thiogalactopyranoside (IPTG) was then added to a final concentration of 0.05 mM to induce the expression of *mtdM* and *mtdL*. After cultivation at 25°C for an additional 12 h, the cells were collected by centrifuge, washed with 50 mM Tris·HCl buffer (pH 8.0) twice, resuspended in the binding buffer (50 mM phosphate buffer, 500 mM NaCl, and 5 mM imidazole, pH 8.0), sonicated (0 °C) and centrifuged. The supernatant was loaded onto 1 mL Ni affinity column packed by Ni-NTA His-Bind Resin, washed by 3 mL washing buffer I (50 mM phosphate buffer, pH 8.0, 500 mM NaCl, 30 mM imidazole, 10% glycerol) and 3 mL washing buffer II (50 mM Tris·HCl buffer, pH 8.0, 500 mM NaCl, 50 mM imidazole, 10% glycerol), eluted by 2.5 mL elution buffer I

(50 mM Tris-HCl buffer, pH 8.0, 500 mM NaCl, 250 mM imidazole, 10% glycerol) and 1 mL elution buffer II (50 mM Tris-HCl buffer, pH 8.0, 500 mM NaCl, 1 M imidazole, 10% glycerol). The fractions eluted by elution buffer I containing MtdM or MtdL were then desalted by PD-10 desalting column, concentrated by filtration on a 10K Amicon Ultra-15 centrifugal filters, finally dissolved in a storage buffer (25 % glycerol, 50 mM phosphate buffer, pH 8.0) and stored at -80 °C for further experiments. All of the protein purification steps were conducted at 4 °C. The concentration of purified MtdM and MtdL was determined using Bio-Rad protein assay dye reagent according to the protocol.

#### **10. Site-directed Mutagenesis and Purification of MtdL Mutant Proteins.**

Site-directed mutagenesis of MtdL was conducted following the Fast Mutagenesis System (TransGen, Beijing, China) manual protocol. The expression and purification of mutant proteins was carried out using the same procedures described above. All primers used here are listed in [Table S7](#).

#### **11. In vitro Biochemical Activities of MtdM and MtdL.**

To validate the in vitro biochemical activities of MtdM and MtdL, we overexpressed and purified the two enzymes as soluble N-terminus-His<sub>6</sub>-tagged proteins from *E. coli* ([Fig. S89](#)). MtdM enzymatic activity was tested in 50  $\mu$ L volume containing 0.2 mM GDP- $\alpha$ -D-mannose (or GDP- $\beta$ -L-galactose), 0.5 mM NAD<sup>+</sup>, 2  $\mu$ M MtdM, in 50 mM Tris-HCl (pH 8.0), at 37 °C for 40 min. The reaction was quenched with 5  $\mu$ L formic acid. After centrifugation to remove the protein, the supernatant was analyzed with analytical HPLC using a 210 solvent delivery module, a 335 photodiode array detector (Varian) and a Waters Symmetry (250 $\times$ 4.60 mm, 5 $\mu$ m) column. Samples were eluted with an isocratic elution of 50 mM triethylammonium acetate (TEAA) containing 1.5 % CH<sub>3</sub>CN in 35 min, at a flow rate of 0.7 mL/min using UV detection at 254 nm.

The reaction mixture was also subjected to LC-MS analysis to confirm the correct molecular weight of each peak (Fig. S88).

Enzymatic activities of MtdL and its site-directed mutants were tested in 50  $\mu\text{L}$  volume containing 0.2 mM GDP- $\beta$ -L-galactose, 5 mM  $\text{Mg}^{2+}$  or  $\text{Mn}^{2+}$ , 2  $\mu\text{M}$  MtdL, in 50 mM PBS (pH 8.0), at 37  $^{\circ}\text{C}$  for 20 min. After quenched with 5  $\mu\text{L}$  formic acid, the supernatant was for HPLC analysis. The detection for MtdL-catalyzed reactions was conducted using a Waters Symmetry column (250 $\times$ 4.60 mm, 5  $\mu\text{m}$ ) connected with another Kromasil 100-5C18 (250 $\times$ 4.60 mm, 5  $\mu\text{m}$ ) column. The rest of the procedure was carried out as noted above.

## 12. Large-scale MtdL Enzymatic Reaction and Characterization of the Product *in situ*.

All the solvents were prepared with 50 mM PBS (dissolved with  $\text{D}_2\text{O}$ ). The Tris-HCl buffer of MtdL protein was exchanged with 50 mM PBS (pH 8.0) three times using Amicon<sup>®</sup> Ultra-0.5 Centrifugal Filter Devices. 2 mg of GDP- $\beta$ -L-galactose was dissolved in 300  $\mu\text{L}$  50 mM PBS (pH 8.0) for  $^1\text{H}$  NMR and H-H COSY analysis. The GDP- $\beta$ -L-galactose solution was used for the large-sized reaction. A total of 500  $\mu\text{L}$  reaction containing 5 mM  $\text{Mg}^{2+}$  and excess MtdL was tested. After incubation at 37  $^{\circ}\text{C}$  for 20 min, the reaction system was filtered through an Amicon<sup>®</sup> Ultra-0.5 Centrifugal Filter Device to remove the enzyme. The supernatant containing both GDP- $\beta$ -L-galactose and MtdL enzymatic products was used to carry out  $^1\text{H}$  NMR and  $^1\text{H}$ - $^1\text{H}$  COSY analyses.

## 13. Antibacterial Activities.

The antibacterial activities of compounds **1**, **2**, and **4–11** were assessed using 2-fold serial dilutions of antibacterial agents in MH broth, according to previously reported standard methods provided by Clinical and Laboratory Standards Institute (CLSI) (8). These compounds were

tested for their antibacterial activities against *Staphylococcus aureus* ATCC 29213, *Escherichia coli* ATCC 25922, *Acinetobacter baumannii* ATCC 19606, *Aeromonas hydrophila* ATCC 7966, *Micrococcus luteus*, methicillin-resistant *Staphylococcus aureus* (clinical isolate shhs-A1 from Shanghai Huashan hospital), and methicillin-resistant *Staphylococcus epidermidis* (clinical isolate shhs-E1 from Shanghai Huashan hospital) using a broth dilution method. Each of the reported MIC values in [Table S11](#) is the lowest concentration of antimicrobial agent that completely inhibits growth of the organism in microdilution wells as detected by the unaided eyes.

#### **14. The Water Solubility of Compound 1 and 6.**

The water solubility of compounds A201A (**1**) and analog des-*N*, *N*-dimethyl A201A (**6**) were calculated using the Water Solubility Module in Percepta software of Advanced Chemistry Development, Inc. At pH 7.32, the water solubility unit of **1** is  $-2.95$  (log(mol/L)) while **6** is  $-2.90$  (log(mol/L)).

## Supplementary Tables S1–S11

**Table S1. The gene cluster for biosynthesis of A201A in *M. thermotolerans* SCSIO 00652 and proposed functions.**

| Protein           | size <sup>a</sup> | protein ID and proposed function                   | <i>ata</i> homolog (protein ID), identity/positive | <i>pur/hyg</i> homolog (protein ID), identity/positive |
|-------------------|-------------------|----------------------------------------------------|----------------------------------------------------|--------------------------------------------------------|
| MtdA              | 244               | AET51839.1, GntR-family transcriptional regulator  | —                                                  | —                                                      |
| MtdB              | 675               | AET51840.1, eptidase S15                           | —                                                  | —                                                      |
| MtdC              | 428               | AET51841.1, putative uncharacterized protein       | —                                                  | —                                                      |
| MtdD              | 111               | AET51842.1, putative uncharacterized protein       | —                                                  | —                                                      |
| MtdE              | 148               | AET51843.1, NTP-pyrophosphohydrolase               | AtaP7 (CAD27645.1), 70/81                          | Pur7 (CAA63159.1), 61/71                               |
| MtdF              | 384               | AET51844.1, oxidoreductase                         | AtaP10 (CAD27646.1), 67/78                         | Pur10 (CAA63160.1), 51/68                              |
| MtdG              | 429               | AET51845.1, aminotransferase                       | AtaP4 (CAD27647.1), 80/87                          | Pur4 (CAA63162.1), 73/80                               |
| MtdM <sub>1</sub> | 234               | AET51846.1, <i>N</i> -methyltransferase            | AtaP5 (CAD27648.1), 75/82                          | Pur5 (CAA63163.1), 66/76                               |
| MtdH              | 354               | AET51847.1, GDP-D-mannose-4, 6-dehydratase         | Ata12 (CAD27644.1), 76/84                          | —                                                      |
| MtdI              | 404               | AET51848.1, acyltransferase                        | AtaPKS1 (CAD27643.1), 60/69                        | Hyg22 (ABC42559.1), 50/62                              |
| MtdG <sub>1</sub> | 375               | AET51849.1, glycosyltransferase                    | Ata13 (CAD62186.1), 77/83                          | —                                                      |
| MtdJ              | 311               | AET51850.1, oxidoreductase                         | Ata14 (CAD62187.1), 49/56                          | —                                                      |
| MtdR <sub>1</sub> | 570               | AET51851.1, ABC transporter                        | Ard1 (CAA59109.1), 53/63                           | —                                                      |
| MtdK              | 452               | AET51852.1, glucokinase                            | Ata15 (CAD62188.1), 53/63                          | —                                                      |
| MtdL              | 376               | AET51853.1, transglycosylase                       | Ata16 (CAD62189.1), 72/82                          | Hyg20 (ABC42557.1), 61/74                              |
| MtdM              | 342               | AET51872.1, NAD-dependent epimerase/dehydratase    | Ata17 (CAD62190.1), 74/81                          | —                                                      |
| MtdN              | 115               | AET51854.1, acyl carrier protein                   | AtaPKS2 (CAD62191.1), 57/71                        | Hyg9 (ABC42546.1), 30/41                               |
| MtdO              | 382               | AET51855.1, ketoacyl synthase 1                    | AtaPKS3 (CAD62192.1), 64/73                        | Hyg10 (ABC42547.1), 53/64                              |
| MtdP              | 268               | AET51856.1, uncharacterized protein                | AtaPKS4 (CAD62193.1), 55/66                        | Hyg11 (ABC42548.1), 51/65                              |
| MtdQ              | 484               | AET51857.1, CoA-ligase                             | Ata18 (CAD62194.1), 61/71                          | Hyg12 (ABC42549.1), 47/60                              |
| MtdS              | 94                | AET51858.1, ACP                                    | Ata19 (CAD62195.1), 63/81                          | Hyg13 (ABC42550.1), 43/63                              |
| MtdT              | 339               | AET51859.1, 3-ketoacyl ACP dehydratase             | Ata2 (CAD62196.1), 72/80                           | Hyg14 (ABC42551.1), 43/58                              |
| MtdR <sub>2</sub> | 194               | AET51860.1, phosphotransferase                     | Ard2 (CAD62197.1), 75/83                           | Hyg21 (ABC42558.1), 59/74                              |
| MtdU              | 249               | AET51861.1, 3-ketoacyl ACP reductase               | Ata4 (CAD62198.1), 73/82                           | Hyg15 (ABC42552.1), 55/69                              |
| MtdG <sub>2</sub> | 426               | AET51862.1, glycosyltransferase                    | Ata5 (CAD62199.1), 75/81                           | Hyg16 (ABC42553.1), 63/72                              |
| MtdM <sub>2</sub> | 354               | AET51863.1, methyltransferase                      | Ata6 (CAD62200.1), 71/78                           | —                                                      |
| MtdV              | 186               | AET51864.1, putative chorismate pyruvate-lyase     | Ata7 (CAD62201.1), 57/65                           | Hyg4 (ABC42541.1), 18/31                               |
| MtdM <sub>3</sub> | 242               | AET51865.1, methyltransferase                      | Ata8 (CAD62202.1), 69/80                           | Hyg6 (ABC42543.1), 28/40                               |
| MtdR <sub>3</sub> | 429               | AET51866.1, transmembrane protein                  | Ata9 (CAD62203.1), 67/78                           | Hyg19 (ABC42556.1), 50/66                              |
| MtdW              | 529               | AET51867.1, oxidoreductase                         | Ata10 (CAD62204.1), 65/73                          | —                                                      |
| MtdM <sub>4</sub> | 240               | AET51868.1, methyltransferase                      | Ata11 (CAD62205.1), 70/78                          | Hyg6 (ABC42543.1), 31/40                               |
| Orf1              | 260               | AET51869.1, inositol-phosphate phosphatase         | AtaP3 (CAD27649.1), 61/73                          | Pur3 (CAA63164.1), 61/72                               |
| Orf2              | 101               | AET51870.1, putative gas vesicle synthesis protein | —                                                  | —                                                      |

<sup>a</sup>Size in units of amino acids (aa); *ata*: biosynthetic gene cluster of A201A in *Saccharothrix mutabilis* subsp. *capreolus*; *pur*: biosynthetic gene cluster of puromycin in *Streptomyces alboniger*; *hyg*: biosynthetic gene cluster of hygromycin A in *Streptomyces hygroscopicus* NRRL 2388; ABC: ATP-binding cassette; CoA: coenzyme A; ACP: acyl carrier protein.



**Table S2. Bacteria and plasmids used in this study.**

| Strains               | Description                                                                                                                      | Reference or source |
|-----------------------|----------------------------------------------------------------------------------------------------------------------------------|---------------------|
| <b><i>E. coli</i></b> |                                                                                                                                  |                     |
| DH5 $\alpha$          | Host strain for general clone                                                                                                    | Stratagene          |
| ET12567               | <i>dam</i> , <i>dcm</i> , <i>hsdS</i> , <i>cat</i> , <i>tet</i>                                                                  | (4)                 |
| BW25113               | K12 derivative: <i>araBAD</i> , <i>rhaBAD</i>                                                                                    | (4)                 |
| BL21(DE3)             | F- <i>ompT hsdS gal dcm</i> (DE3)                                                                                                | Novagen             |
| <b>Plasmids</b>       |                                                                                                                                  |                     |
| pCR2.1                | Amp <sup>R</sup> , Kan <sup>R</sup> , general clone vector                                                                       | Invitrogen          |
| pET28a(+)             | Kan <sup>R</sup> , expression vector                                                                                             | Novagen             |
| pIJ790                | Cml <sup>R</sup> , including $\lambda$ -RED ( <i>gam</i> , <i>bet</i> , <i>exo</i> ) for PCR-targeting                           | (4)                 |
| pIJ773                | <i>aac(3)IV</i> (Apr <sup>R</sup> ), <i>oriT</i>                                                                                 | (4)                 |
| pUZ8002               | <i>tra</i> , <i>neo</i> , <i>RP4</i>                                                                                             | (4)                 |
| 142H                  | <i>M. thermotolerans</i> SCSIO 00652 genomic library cosmid                                                                      | This study          |
| 49C                   | <i>M. thermotolerans</i> SCSIO 00652 genomic library cosmid                                                                      | This study          |
| 1912A                 | <i>M. thermotolerans</i> SCSIO 00652 genomic library cosmid                                                                      | This study          |
| pJu3003               | 49C cosmid derivative where <i>mtdB</i> was disrupted by <i>aac(3)IV-oriT</i> fragment using primers BdF and BdR                 | This study          |
| pJu3004               | 49C cosmid derivative where <i>mtdC</i> was disrupted by <i>aac(3)IV-oriT</i> fragment using primers CdF and CdR                 | This study          |
| pJu3005               | 49C cosmid derivative where <i>mtdD</i> was disrupted by <i>aac(3)IV-oriT</i> fragment using primers DdF and DdR                 | This study          |
| pJu3006               | 49C cosmid derivative where <i>mtdM<sub>1</sub></i> was disrupted by <i>aac(3)IV-oriT</i> fragment using primers M1dF and M1dR   | This study          |
| pJu3007               | 49C cosmid derivative where <i>mtdH</i> was disrupted by <i>aac(3)IV-oriT</i> fragment using primers HdF and HdR                 | This study          |
| pJu3008               | 49C cosmid derivative where <i>mtdG<sub>1</sub></i> was disrupted by <i>aac(3)IV-oriT</i> fragment using primers G1dF and G1dR   | This study          |
| pJu3009               | 142H cosmid derivative where <i>mtdJ</i> was disrupted by <i>aac(3)IV-oriT</i> fragment using primers JdF and JdR                | This study          |
| pJu3010               | 142H cosmid derivative where <i>mtdK</i> was disrupted by <i>aac(3)IV-oriT</i> fragment using primers KdF and KdR                | This study          |
| pJu3011               | 142H cosmid derivative where <i>mtdL</i> was disrupted by <i>aac(3)IV-oriT</i> fragment using primers LdF and LdR                | This study          |
| pJu3012               | 142H cosmid derivative where <i>mtdM</i> was disrupted by <i>aac(3)IV-oriT</i> fragment using primers MdF and MdR                | This study          |
| pJu3013               | 1912A cosmid derivative where <i>mtdG<sub>2</sub></i> was disrupted by <i>aac(3)IV-oriT</i> fragment using primers G2dF and G2dR | This study          |
| pJu3014               | 1912A cosmid derivative where <i>mtdM<sub>2</sub></i> was disrupted by <i>aac(3)IV-oriT</i> fragment using primers M2dF and M2dR | This study          |
| pJu3015               | 1912A cosmid derivative where <i>mtdM<sub>3</sub></i> was disrupted by <i>aac(3)IV-oriT</i> fragment using primers M3dF and M3dR | This study          |
| pJu3016               | 1912A cosmid derivative where <i>mtdW</i> was disrupted by <i>aac(3)IV-oriT</i> fragment using primers WdF and WdR               | This study          |

|                         |                                                                                                                                                                                                                                 |            |
|-------------------------|---------------------------------------------------------------------------------------------------------------------------------------------------------------------------------------------------------------------------------|------------|
| pJu3017                 | 1912A cosmid derivative where <i>mtdM<sub>4</sub></i> was disrupted by <i>aac(3)IV-oriT</i> fragment using primers M4dF and M4dR                                                                                                | This study |
| pJu3018                 | 1912A cosmid derivative where <i>mtdWM<sub>4</sub></i> was disrupted by <i>aac(3)IV-oriT</i> fragment using primers WdF and M4dR                                                                                                | This study |
| pJu3019                 | 1912A cosmid derivative where <i>orf1</i> was disrupted by <i>aac(3)IV-oriT</i> fragment using primers orf1dF and orf1dR                                                                                                        | This study |
| pJu3020                 | 1912A cosmid derivative where <i>orf2</i> was disrupted by <i>aac(3)IV-oriT</i> fragment using primers orf2dF and orf2dR                                                                                                        | This study |
| pJu3021                 | 142H cosmid derivative where <i>mtdWM<sub>4</sub></i> was disrupted by <i>aac(3)IV-oriT</i> fragment using primers WdelAprF and M4delAprR                                                                                       | This study |
| pJu3022                 | pJu3021 cosmid derivative where <i>mtdWM<sub>4</sub></i> was in-frame deleted                                                                                                                                                   | This study |
| pJu3023                 | pJu3022 cosmid derivative where <i>mtdWM<sub>4</sub></i> was in-frame deleted and kanamycin resistant gene was replaced by <i>aac(3)IV-oriT</i> fragment using primers pJ773forw and pJ773rev                                   | This study |
| pJu3024                 | pJu3022 cosmid derivative where <i>mtdWM<sub>4</sub></i> was in-frame deleted and <i>mtdG<sub>1</sub></i> was disrupted by <i>aac(3)IV-oriT</i> fragment using primers G1dF and G1dR                                            | This study |
| pJu3025                 | 142H cosmid derivative where <i>mtdM<sub>2</sub></i> was in-frame deleted using primers mtdspelAprM2F and mtdspelAprM2R, and <i>mtdM<sub>3</sub></i> was disrupted by <i>aac(3)IV-oriT</i> fragment using primers M3dF and M3dR | This study |
| <i>S. lividans</i> TK64 | <i>SLP2<sup>-</sup> SLP3<sup>-</sup> pro-2 str-6</i>                                                                                                                                                                            | (9)        |

**Table S3. Primer pairs used in screening for the biosynthetic gene cluster of A201A in the genomic library of *Marinactinospora thermotolerans* SCSIO 00652.**

| Locus       | Primer code | Sequences (5'-3')     | Length of deduced product |
|-------------|-------------|-----------------------|---------------------------|
| <i>mtdG</i> | mtdGF       | CTGTTTCGCCGCCTATTTTCG | 514bp                     |
|             | mtdGR       | CGAACCCGCTCACCCAGTAG  |                           |
| <i>mtdM</i> | mtdMF       | GGTGCTCGGTGCCGATGTTG  | 508bp                     |
|             | mtdMR       | TTCATCTCCGCCAACCCAG   |                           |
| <i>mtdW</i> | mtdWF       | TGACGGTTGGACCCATCGC   | 645bp                     |
|             | mtdWR       | TTGGCCTCGCCGTCAGACTC  |                           |

**Table S4. Primer pairs used for mutant producer strain construction.**

| Gene target                           | Primer code   | Primer pairs used for inactivation (5'-3')                       |
|---------------------------------------|---------------|------------------------------------------------------------------|
| <i>mtdB</i>                           | BdF           | tgggccgacgggtactccaacgcggtcttccgtctcatgATTCCGGGGATCCGTCGACC      |
|                                       | BdR           | accgatgtcgtcgaaacggaccgtgccagatccttgacTGTAGGCTGGAGCTGCTTC        |
| <i>mtdC</i>                           | CdF           | atcttcgtcctgggactggagcagacacaaccgcgagaccATTCCGGGGATCCGTCGAC      |
|                                       | CdR           | gacgcaccggctgtactgtctctcagctcctcctcgtcTGTAGGCTGGAGCTGCTTC        |
| <i>mtdD</i>                           | DdF           | ctgatctcctggctcaacggcgtctacgccatgcagcggATTCCGGGGATCCGTCGAC       |
|                                       | DdR           | cgacctgctcggggcgtaatcgccaggcgctcctgaTGTAGGCTGGAGCTGCTTC          |
| <i>mtdM<sub>1</sub></i>               | M1dF          | gccacggaggctatggcgtcggccctccctaccctgtcATTCCGGGGATCCGTCGAC        |
|                                       | M1dR          | gtccccggccagccgttccagcagcgcgctcggcgagTGTAGGCTGGAGCTGCTTC         |
| <i>mtdH</i>                           | HdF           | cagaagagcctgaccacggccatcgaccaggtacaaccATTCCGGGGATCCGTCGACC       |
|                                       | HdR:          | gacgtcccgacggaatgggtgcgccggtgccgatgacTGTAGGCTGGAGCTGCTTC         |
| <i>mtdG<sub>1</sub></i>               | G1dF          | gaccacctgcagcgcgtgtggacctcctcagcactccATTCCGGGGATCCGTCGAC         |
|                                       | G1dR          | ttcggcgtcgtcctcgcgtgccggcgagcagcggcgtTGTAGGCTGGAGCTGCTTC         |
| <i>mtdJ</i>                           | JdF           | gggtgggtgctggcacggggctcggcagcgtgggcacATTCCGGGGATCCGTCGAC         |
|                                       | JdR           | gacggcggccggatcgaggggcaggagcggctcggtagTGTAGGCTGGAGCTGCTTC        |
| <i>mtdK</i>                           | KdF           | ctcaccgccgacagggcggagggttcttgagcaggtcATTCCGGGGATCCGTCGACC        |
|                                       | KdR           | caggtagggccatagcgagcagaatggggcgaaccTGTAGGCTGGAGCTGCTTC           |
| <i>mtdL</i>                           | LdF           | gacgtggtctgtctccctcgtggcgaacagcaggatctcATTCCGGGGATCCGTCGACC      |
|                                       | LdR           | accgttagcccgctcggcgatctcctggagggcataactTGTAGGCTGGAGCTGCTTC       |
| <i>mtdM</i>                           | MdF           | ctccacctccccgagtccgaccaccgaagccgacgagATTCCGGGGATCCGTCGACC        |
|                                       | MdR           | gatgtcccgctgatccagtggtacatggcgtcatcccTGTAGGCTGGAGCTGCTTC         |
| <i>MtdG<sub>2</sub></i>               | G2dF          | agggtccctccctacctgccgttcggcagcgtggagcgcATTCCGGGGATCCGTCGAC       |
|                                       | G2dR          | gaccacgttgggacggcgtgtccagtgccgagatgacTGTAGGCTGGAGCTGCTTC         |
| <i>mtdM<sub>2</sub></i>               | M2dF          | gacggccacttcgacctgatctctgtctcagcgtcctgATTCCGGGGATCCGTCGAC        |
|                                       | M2dR          | attgcggtagacctcgggaacagtgggctggcaggcTGTAGGCTGGAGCTGCTTC          |
| <i>mtdM<sub>3</sub></i>               | M3dF          | cggtgggacaccatgatgctgcctggttcccaagtacATTCCGGGGATCCGTCGAC         |
|                                       | M3dR          | cctgaggaggacggggtcatagccccaggaaacggtagagTGTAGGCTGGAGCTGCTTC      |
| <i>mtdW</i>                           | WdF           | atcaacgggctgatcccatgtgcccgatgcccaggagacATTCCGGGGATCCGTCGAC       |
|                                       | WdR           | cgctcgtggcagcgggcccaccatccaggagtcgagttcTGTAGGCTGGAGCTGCTTC       |
| <i>mtdM<sub>4</sub></i>               | M4dF          | ccgggcaccgtgaaggtagaaacgcggtgcaaccATTCCGGGGATCCGTCGAC            |
|                                       | M4dR          | cgggatctcctcagcttccgaccgctcatcctgtagcgcTGTAGGCTGGAGCTGCTTC       |
| <i>mtdWM<sub>4</sub></i>              | WdF           | atcaacgggctgatcccatgtgcccgatgcccaggagacATTCCGGGGATCCGTCGAC       |
|                                       | M4dR          | cgggatctcctcagcttccgaccgctcatcctgtagcgcTGTAGGCTGGAGCTGCTTC       |
| <i>orf1</i>                           | orf1dF        | gcacgctacggggcgtgacctccaggtccgtgacaaaATTCCGGGGATCCGTCGACC        |
|                                       | orf1dR        | ggcgtatgtcccagaaccgacgatcggctcggccgagTGTAGGCTGGAGCTGCTTC         |
| <i>orf2</i>                           | orf2dF        | gagcagcgcggaaccaggaagaagaagtcggtggcgATTCCGGGGATCCGTCGAC          |
|                                       | orf2dR        | gtagcagcagcctcgggtactcgtatgaggtaccgctTGTAGGCTGGAGCTGCTTC         |
| <i>mtdG<sub>1</sub>WM<sub>4</sub></i> | WdelAprF      | ctcattctccgatcagggaagcgcctccgatcgaagACTAGTATTCCGGGGATCCGTCGACC   |
|                                       | M4delAprR     | cgggatctcctcagcttccgaccgctcatcctgtagcgcACTAGTTGTAGGCTGGAGCTGCTTC |
|                                       | G1dF          | gaccacctgcagcgcgtgtggacctcctcagcactccATTCCGGGGATCCGTCGAC         |
|                                       | G1dR          | ttcggcgtcgtcctcgcgtgccggcgagcagcggcgtTGTAGGCTGGAGCTGCTTC         |
| <i>mtdM<sub>2</sub>M<sub>3</sub></i>  | mtdspelAprM2F | gagtacccctgggcccaccaccagcggctcgtcgcccACTAGTATTCCGGGGATCCGTCGAC   |
|                                       | mtdspelAprM2R | cagcgtccgccacctcaggcggctccacgaccgctcACTAGTTGTAGGCTGGAGCTGCTTC    |
|                                       | M3dF          | cggtgggacaccatgatgctgcctggttcccaagtacATTCCGGGGATCCGTCGAC         |
|                                       | M3dR          | cctgaggaggacggggtcatagccccaggaaacggtagagTGTAGGCTGGAGCTGCTTC      |

<sup>a</sup> small letters were derived from targeted genes

**Table S5. Primer pairs used for PCR confirmation of the double-crossover mutants.**

| Gene                                  | Primer code | Primer pairs designed to verify the mutants (5'-3') | Length of desired PCR fragments |               |
|---------------------------------------|-------------|-----------------------------------------------------|---------------------------------|---------------|
|                                       |             |                                                     | Wild strain                     | Mutant strain |
| <i>mtdB</i>                           | BtF         | TGACCGTCGTGACCGACCAG                                | 1460                            | 1857          |
|                                       | BtR         | GTGCTCCACCGACGACCGT                                 |                                 |               |
| <i>mtdC</i>                           | CtF         | CAGCTCCTGCTCCAGGTACTC                               | 1892                            | 2115          |
|                                       | CtR         | GGACCTCTTCCATGCCGTCG                                |                                 |               |
| <i>mtdD</i>                           | DtF         | CGGTTGTGCTCGTCCAGTCCCA                              | 894                             | 2029          |
|                                       | DtR         | CCGGACCGTCAGCGGAAAGG                                |                                 |               |
| <i>mtdM<sub>1</sub></i>               | M1tF        | AGTACGACACCCGATCACGA                                | 914                             | 1905          |
|                                       | M1tR        | GAGCTGGTGC GGATGATGGT                               |                                 |               |
| <i>mtdH</i>                           | HtF         | ACCATCATCCGCACCAGCTC                                | 994                             | 1835          |
|                                       | HtR         | GGTTCACCGTGCATGACGC                                 |                                 |               |
| <i>mtdG<sub>1</sub></i>               | G1tF        | TGGCCGAACTCTACTGTCATGG                              | 1108                            | 1895          |
|                                       | G1tR        | CGCCCTGGAGAATCTGCGTC                                |                                 |               |
| <i>mtdJ</i>                           | JtF         | GACGCAGATTCTCCAGGGCG                                | 1206                            | 1837          |
|                                       | JtR         | ACGCTCCTCCTCGTGACCC                                 |                                 |               |
| <i>mtdK</i>                           | KtF         | GGAAGTGTTCGTAGTCGGGT                                | 1359                            | 1936          |
|                                       | KtR         | CACCTGATGCGTTCCTGGACG                               |                                 |               |
| <i>mtdL</i>                           | LtF         | AGGTAACGGATCTTCAGCAGG                               | 1468                            | 2057          |
|                                       | LtR         | ACTGGATCGAGCGGGACATC                                |                                 |               |
| <i>mtdM</i>                           | MtF         | TCGGGGATCACGATCAGCCG                                | 1208                            | 1806          |
|                                       | MtR         | CGCTTTCACCATCACGTTCCG                               |                                 |               |
| <i>MtdG<sub>2</sub></i>               | G2tF        | CGTGTCTCTTCTTCCCCTGG                                | 1127                            | 1806          |
|                                       | G2tR        | ATGTCCACCGAGGCGACGT                                 |                                 |               |
| <i>mtdM<sub>2</sub></i>               | M2tF        | GACCGCAACGACAACGTCAA                                | 1169                            | 1917          |
|                                       | M2tR        | TTCCAGCACGTGGGCCTC                                  |                                 |               |
| <i>mtdM<sub>3</sub></i>               | M3tF        | ACCTACCGGATCGTCATCGAA                               | 965                             | 1806          |
|                                       | M3tR        | TACGACGAGCACTAGGTCCT                                |                                 |               |
| <i>mtdW</i>                           | WtF         | AACCAAGGAGGAAAGAGCGA                                | 1512                            | 1928          |
|                                       | WtR         | GGACGAGACGGATGTGTCATGT                              |                                 |               |
| <i>mtdM<sub>4</sub></i>               | M4tF        | CGCCGACCACATGACACATCC                               | 1062                            | 1918          |
|                                       | M4tR        | GGAAGTTCTTGGTCCCGTCG                                |                                 |               |
| <i>mtdWM<sub>4</sub></i>              | WtF         | AACCAAGGAGGAAAGAGCGA                                | 2544                            | 2094          |
|                                       | M4tR        | GGAAGTTCTTGGTCCCGTCG                                |                                 |               |
| <i>orf1</i>                           | orf1tF      | GTGACGACTACATCAACCTCCTG                             | 799                             | 1670          |
|                                       | orf1tR      | GCGAGGACGCTGGTGATGC                                 |                                 |               |
| <i>orf2</i>                           | orf2tF      | GTCGAAGCCGCAGGTCATCC                                | 563                             | 1758          |
|                                       | orf2tR      | CGAGGTCTGCTGAACGACGG                                |                                 |               |
| <i>mtdG<sub>1</sub>WM<sub>4</sub></i> | WtF2        | GAGGATCTGGCTGACGGTAC                                | 2812                            | 657           |
|                                       | M4tR        | GGAAGTTCTTGGTCCCGTCG                                |                                 |               |
|                                       | G1tF        | TGGCCGAACTCTACTGTCATGG                              | 1108                            | 1895          |
|                                       | G1tR        | CGCCCTGGAGAATCTGCGTC                                |                                 |               |
| <i>mtdM<sub>2</sub>M<sub>3</sub></i>  | M2tF        | GACCGCAACGACAACGTCAA                                | 1169                            | 410           |

|      |                       |     |      |
|------|-----------------------|-----|------|
| M2tR | TTCCAGCACGTGGGCCTC    |     |      |
| M3tF | ACCTACCGGATCGTCATCGAA |     |      |
| M3tR | TACGACGAGCACTAGGTCCT  | 965 | 1806 |

**Table S6. Mutant strains generated in this study.**

| Wild strain | A201A producing strain                                                                                                                                 |
|-------------|--------------------------------------------------------------------------------------------------------------------------------------------------------|
| Ju3003      | <i>mtdB</i> gene disrupted mutant of SCSIO 00652                                                                                                       |
| Ju3004      | <i>mtdC</i> gene disrupted mutant of SCSIO 00652                                                                                                       |
| Ju3005      | <i>mtdD</i> gene disrupted mutant of SCSIO 00652                                                                                                       |
| Ju3006      | <i>mtdM<sub>1</sub></i> gene disrupted mutant of SCSIO 00652                                                                                           |
| Ju3007      | <i>mtdH</i> gene disrupted mutant of SCSIO 00652                                                                                                       |
| Ju3008      | <i>mtdG<sub>1</sub></i> gene disrupted mutant of SCSIO 00652                                                                                           |
| Ju3009      | <i>mtdJ</i> gene disrupted mutant of SCSIO 00652                                                                                                       |
| Ju3010      | <i>mtdK</i> gene disrupted mutant of SCSIO 00652                                                                                                       |
| Ju3011      | <i>mtdL</i> gene disrupted mutant of SCSIO 00652                                                                                                       |
| Ju3012      | <i>mtdM</i> gene disrupted mutant of SCSIO 00652                                                                                                       |
| Ju3013      | <i>MtdG<sub>2</sub></i> gene disrupted mutant of SCSIO 00652                                                                                           |
| Ju3014      | <i>mtdM<sub>2</sub></i> gene disrupted mutant of SCSIO 00652                                                                                           |
| Ju3015      | <i>mtdM<sub>3</sub></i> gene disrupted mutant of SCSIO 00652                                                                                           |
| Ju3016      | <i>mtdW</i> gene disrupted mutant of SCSIO 00652                                                                                                       |
| Ju3017      | <i>mtdM<sub>4</sub></i> gene disrupted mutant of SCSIO 00652                                                                                           |
| Ju3018      | <i>mtdWM<sub>4</sub></i> gene disrupted mutant of SCSIO 00652                                                                                          |
| Ju3019      | <i>orf1</i> gene disrupted mutant of SCSIO 00652                                                                                                       |
| Ju3020      | <i>orf2</i> gene disrupted mutant of SCSIO 00652                                                                                                       |
| Ju3023      | mutant of SCSIO 00652 in which <i>mtdWM<sub>4</sub></i> was in frame deleted                                                                           |
| Ju3024      | mutant of SCSIO 00652 in which <i>mtdWM<sub>4</sub></i> was in frame deleted and <i>mtdG<sub>1</sub></i> was replaced by <i>aac(3)IV-oriT</i> fragment |
| Ju3025      | mutant of SCSIO 00652 in which <i>mtdM<sub>2</sub></i> was in frame deleted and <i>mtdM<sub>3</sub></i> was replaced by <i>aac(3)IV-oriT</i> fragment  |

**Table S7. Primer pairs used for site-directed mutagenesis of MtdL.**

| Name of sequence   | Sequence (5'-3')            |
|--------------------|-----------------------------|
| 652-mtdL-D109A     | CGTCTCGATGGCGGACGACAACCTC   |
| 652-mtdL-D109Aanti | GAGGTTGTCGTCCGCCATCGAGACG   |
| 652-mtdL-D110A     | CTCGATGGACGCGGACAACCTCCCC   |
| 652-mtdL-D110Aanti | GGGAGGTTGTCCGCGTCCATCGAG    |
| 652-mtdL-D111A     | CGATGGACGACGCGAACCTCCCCAC   |
| 652-mtdL-D111Aanti | GTGGGAGGTTCCGCGTCGTCCATCG   |
| 652-mtdL-R159A     | GAGGTCTTCCCCGCGGTTTCCCCTTC  |
| 652-mtdL-R159Aanti | GAAGGGGAAACCCGCGGGGAAGACCTC |

**Table S8.  $^1\text{H}$  and  $^{13}\text{C}$  NMR spectral data of 1 in  $\text{DMSO-}d_6$  and  $\text{CD}_3\text{OD}$ , and 2 and 3 in  $\text{CD}_3\text{OD}$ .**

|                      |                   | 1 ( $\text{DMSO-}d_6$ ) |                                               | 1 ( $\text{CD}_3\text{OD}$ ) |                                               | 2                   |                                               | 3                   |                                               |
|----------------------|-------------------|-------------------------|-----------------------------------------------|------------------------------|-----------------------------------------------|---------------------|-----------------------------------------------|---------------------|-----------------------------------------------|
|                      |                   | $\delta_{\text{C}}$     | $\delta_{\text{H}}$                           | $\delta_{\text{C}}$          | $\delta_{\text{H}}$                           | $\delta_{\text{C}}$ | $\delta_{\text{H}}$                           | $\delta_{\text{C}}$ | $\delta_{\text{H}}$                           |
| Adenine moiety       | 2                 | 151.8                   | 8.24, s                                       | 153.0                        | 8.21, s                                       | 153.5               | 8.24, s                                       | 151.9               | 8.23, s                                       |
|                      | 4                 | 149.6                   |                                               | 150.6                        |                                               | 150.7               |                                               | 149.5               |                                               |
|                      | 5                 | 119.6                   |                                               | 121.6                        |                                               | 121.7               |                                               | 121.0               |                                               |
|                      | 6                 | 154.2                   |                                               | 156.1                        |                                               | 156.2               |                                               | 156.6               |                                               |
| Aminopentose moiety  | 8                 | 137.8                   | 8.48, s                                       | 139.2                        | 8.38, s                                       | 139.3               | 8.41, s                                       | 138.0               | 8.41, s                                       |
|                      | 10- $\text{CH}_3$ | 37.7                    | 3.37, br s                                    | 39.2                         | 3.49, br s                                    | 39.1                | 3.53, br s                                    | 38.5                | 3.52, br s                                    |
|                      | 1                 | 89.3                    | 6.05, d (3.0)                                 | 92.0                         | 6.11, d (3.1)                                 | 92.1                | 6.11, d (3.0)                                 | 91.5                | 6.11, d (3.0)                                 |
|                      | 2                 | 73.1                    | 4.53, dd (5.6, 3.0)                           | 75.1                         | 4.73, dd (5.8, 3.1)                           | 75.2                | 4.69, dd (6.0, 3.0)                           | 74.0                | 4.70, m                                       |
|                      | 3                 | 50.7                    | 4.59, m                                       | 52.6                         | 4.80 *                                        | 52.6                | 4.76, t (6.0)                                 | 51.5                | 4.77, t (6.3)                                 |
|                      | 3-NH              |                         | 7.88, d (7.2)                                 |                              |                                               |                     |                                               |                     |                                               |
| Aromatic acid moiety | 4                 | 82.7                    | 4.22, m                                       | 85.2                         | 4.30, m                                       | 85.2                | 4.33, m                                       | 84.0                | 4.33, m                                       |
|                      | 5                 | 60.7                    | 3.77, dd (12.1, 1.8);<br>3.59, dd (12.1, 3.4) | 62.6                         | 4.00, dd (12.5, 1.5);<br>3.90, dd (12.5, 2.6) | 62.6                | 3.99, dd (12.5, 2.0);<br>3.82, dd (12.5, 3.0) | 62.6                | 3.99, dd (12.5, 1.5);<br>3.82, dd (13.0, 2.5) |
|                      | 1                 | 129.9                   |                                               | 131.9                        |                                               | 130.0               |                                               | 130.5               |                                               |
|                      | 2,6               | 130.7                   | 7.41, d (8.8)                                 | 132.1                        | 7.40, d (8.6)                                 | 132.4               | 6.84, d (8.5)                                 | 132.1               | 7.39, d (8.5)                                 |
|                      | 3,5               | 116.3                   | 7.12, d (8.8)                                 | 117.8                        | 7.20, d (8.6)                                 | 116.3               | 7.31, d (8.5)                                 | 118.0               | 7.18, d (8.5)                                 |
|                      | 4                 | 156.0                   |                                               | 158.0                        |                                               | 158.9               |                                               | 156.2               |                                               |
|                      | 7                 | 132.2                   | 7.27, s                                       | 135.0                        | 7.32, s                                       | 135.9               | 7.32, s                                       | 135.3               | 7.34, s                                       |
|                      | 8                 | 130.7                   |                                               | 132.1                        |                                               | 128.7               |                                               | 131.3               |                                               |
|                      | 9                 | 169.3                   |                                               | 173.1                        |                                               | 173.5               |                                               | 171.3               |                                               |
|                      | 8- $\text{CH}_3$  | 14.3                    | 2.05, s                                       | 14.7                         | 2.13, s                                       | 14.6                | 2.15, s                                       | 14.7                | 2.13, s                                       |
| Hexofuranose moiety  | 1                 | 99.3                    | 5.87, d (4.2)                                 | 101.4                        | 5.88, d (4.1)                                 |                     |                                               | 100.3               | 5.60, d (4.5)                                 |
|                      | 2                 | 76.3                    | 4.08, m                                       | 78.3                         | 4.25, dd (5.3, 4.1)                           |                     |                                               | 78.7                | 4.18, dd (8.0, 4.5)                           |
|                      | 3                 | 72.7                    | 4.57, m                                       | 74.7                         | 4.80, m                                       |                     |                                               | 74.5                | 4.32, t (7.5)                                 |
|                      | 4                 | 143.1                   |                                               | 144.7                        |                                               |                     |                                               | 83.9                | 3.85, dd (7.0, 5.0)                           |
|                      | 5                 | 132.0                   |                                               | 134.3                        |                                               |                     |                                               | 74.0                | 3.68, dd (11.0, 5.0)                          |
|                      | 6                 | 62.3                    | 4.31, d (12.5);<br>4.00, d (12.5)             | 64.3                         | 4.43, d (12.5);<br>4.16, d (12.5)             |                     |                                               | 63.8                | 3.63, d (7.0, 4.5);<br>3.56, d (11.0, 6.0)    |
| Rhamnose moiety      | 5-OMe             | 57.3                    | 3.49, s                                       | 61.0                         | 3.65, s                                       |                     |                                               |                     |                                               |
|                      | 1                 | 99.6                    | 4.67, br d                                    | 100.8                        | 4.80 *                                        |                     |                                               |                     |                                               |
|                      | 2                 | 66.1                    | 3.84, s                                       | 68.4                         | 4.03, s                                       |                     |                                               |                     |                                               |
|                      | 3                 | 80.7                    | 3.22, dd (9.3, 3.1)                           | 82.4                         | 3.41, dd (9.4, 3.1)                           |                     |                                               |                     |                                               |
|                      | 4                 | 81.2                    | 3.02, t (9.3)                                 | 83.1                         | 3.16, t (9.4)                                 |                     |                                               |                     |                                               |
|                      | 5                 | 67.0                    | 3.48, m                                       | 69.0                         | 3.68, m                                       |                     |                                               |                     |                                               |
|                      | 6                 | 17.7                    | 1.17, d (6.2)                                 | 18.2                         | 1.29, d (6.5)                                 |                     |                                               |                     |                                               |
|                      | 3-OMe             | 55.9                    | 3.29, s                                       | 57.2                         | 3.43, s                                       |                     |                                               |                     |                                               |
| 4-OMe                | 59.8              | 3.39, s                 | 59.0                                          | 3.52, s                      |                                               |                     |                                               |                     |                                               |

\* Overlapped

**Table S9. <sup>1</sup>H and <sup>13</sup>C NMR spectral data of 4 in CD<sub>3</sub>OD/CDCl<sub>3</sub> and 5–7 in CD<sub>3</sub>OD.**

|                      |                    | 4                                             |                                   | 5                                       |                                   | 6                                             |                                   | 7                                       |                                   |
|----------------------|--------------------|-----------------------------------------------|-----------------------------------|-----------------------------------------|-----------------------------------|-----------------------------------------------|-----------------------------------|-----------------------------------------|-----------------------------------|
|                      |                    | $\delta_C$                                    | $\delta_H$                        | $\delta_C$                              | $\delta_H$                        | $\delta_C$                                    | $\delta_H$                        | $\delta_C$                              | $\delta_H$                        |
| Adenine moiety       | 2                  | 151.9                                         | 8.25, s                           | 153.0                                   | 8.22, s                           | 153.8                                         | 8.24, s                           | 152.9                                   | 8.19, s                           |
|                      | 4                  | 148.9                                         |                                   | 150.7                                   |                                   | 150.0                                         |                                   | 150.5                                   |                                   |
|                      | 5                  | 121.1                                         |                                   | 121.7                                   |                                   | 120.7                                         |                                   | 121.5                                   |                                   |
|                      | 6                  | 155.2                                         |                                   | 156.2                                   |                                   | 157.5                                         |                                   | 156.0                                   |                                   |
|                      | 8                  | 137.7                                         | 8.34, s                           | 139.3                                   | 8.40, s                           | 141.2                                         | 8.48, s                           | 139.2                                   | 8.38, s                           |
| Aminopentose moiety  | 10-CH <sub>3</sub> | 38.9                                          | 3.53, br s                        | 39.1                                    | 3.50, s                           |                                               |                                   | 39.1                                    | 3.45, s                           |
|                      | 1                  | 91.4                                          | 6.01, d (2.9)                     | 92.1                                    | 6.11, d (3.0)                     | 92.2                                          | 6.13, d (3.0)                     | 92.0                                    | 6.10, d (1.8)                     |
|                      | 2                  | 74.5                                          | 4.59, dd (6.0, 2.9)               | 75.2                                    | 4.72, dd (6.0, 3.0)               | 75.3                                          | 4.73, dd (5.9, 3.0)               | 75.1                                    | 4.72, dd (5.7, 3.0)               |
|                      | 3                  | 50.7                                          | 4.64, t (6.0)                     | 52.7                                    | 4.77, d (6.0)                     | 52.6                                          | 4.79, m                           | 52.5                                    | 4.77, m                           |
|                      | 3-NH               |                                               |                                   |                                         |                                   |                                               |                                   |                                         |                                   |
|                      | 4                  | 84.9                                          | 4.30, m                           | 85.2                                    | 4.35, br d (7.0)                  | 85.2                                          | 4.34, m                           | 85.1                                    | 4.34, m                           |
| 5                    | 61.6               | 4.05, dd (12.9, 1.5);<br>3.87, dd (12.9, 2.2) | 62.7                              | 4.00, br d (12.0);<br>3.84, br d (12.0) | 62.6                              | 3.99, dd (12.5, 1.8);<br>3.83, dd (12.5, 3.0) | 62.6                              | 4.00, br d (11.3);<br>3.82, br d (11.3) |                                   |
| Aromatic acid moiety | 1                  | 130.0                                         |                                   | 131.9                                   |                                   | 131.9                                         |                                   | 131.8                                   |                                   |
|                      | 2,6                | 131.3                                         | 7.35, d (8.5)                     | 132.1                                   | 7.41, d (8.5)                     | 132.1                                         | 7.40, dd (7.2, 2.0)               | 132.1                                   | 7.37, d (8.2)                     |
|                      | 3,5                | 117.1                                         | 7.17, d (8.5)                     | 117.9                                   | 7.21, d (8.5)                     | 117.8                                         | 7.21, dd (7.2, 2.0)               | 117.8                                   | 7.18, d (8.2)                     |
|                      | 4                  | 156.9                                         |                                   | 158.1                                   |                                   | 158.1                                         |                                   | 158.0                                   |                                   |
|                      | 7                  | 135.0                                         | 7.36, s                           | 135.0                                   | 7.33, s                           | 135.1                                         | 7.34, s                           | 135.1                                   | 7.31, s                           |
|                      | 8                  | 130.6                                         |                                   | 132.1                                   |                                   | 131.9                                         |                                   | 132.1                                   |                                   |
|                      | 9                  | 171.3                                         |                                   | 173.2                                   |                                   | 173.2                                         |                                   | 173.1                                   |                                   |
|                      | 8-CH <sub>3</sub>  | 14.2                                          | 2.13, s                           | 14.6                                    | 2.14, s                           | 14.6                                          | 2.14, s                           | 14.7                                    | 2.12, s                           |
|                      | 1                  | 100.4                                         | 5.82, d (4.1)                     | 101.5                                   | 5.89, d (4.2)                     | 101.4                                         | 5.89, d (4.2)                     | 101.9                                   | 5.88, d (3.7)                     |
| Hexofuranose moiety  | 2                  | 77.0                                          | 4.23, m                           | 78.3                                    | 4.24, t (4.2)                     | 78.3                                          | 4.23, dd (5.4, 4.2)               | 78.2                                    | 4.24, m                           |
|                      | 3                  | 75.6                                          | 4.81, br d (5.4)                  | 74.7                                    | 4.80, m                           | 74.7                                          | 4.78, m                           | 74.7                                    | 4.78, br d (8.7)                  |
|                      | 4                  | 141.7                                         |                                   | 144.9                                   |                                   | 144.7                                         |                                   | 144.7                                   |                                   |
|                      | 5                  | 136.1                                         |                                   | 134.3                                   |                                   | 134.4                                         |                                   | 134.3                                   |                                   |
|                      | 6                  | 58.6                                          | 4.26, d (13.4);<br>4.16, d (13.4) | 64.2                                    | 4.45, d (12.5);<br>4.19, d (12.5) | 64.3                                          | 4.43, d (12.5);<br>4.15, d (12.5) | 64.2                                    | 4.46, d (12.5);<br>4.16, d (12.5) |
|                      | 5-OMe              | 58.6                                          | 3.70, s                           | 59.1                                    | 3.65, s                           | 59.0                                          | 3.65, s                           | 59.0                                    | 3.65, s                           |
| Rhamnose moiety      | 1                  |                                               |                                   | 100.7                                   | 4.92, s                           | 100.8                                         | 4.83, d (1.4)                     | 101.3                                   | 4.86, br s                        |
|                      | 2                  |                                               |                                   | 68.4                                    | 4.02, br s                        | 68.4                                          | 4.02, dd (3.0, 1.4)               | 68.1                                    | 4.05, br s                        |
|                      | 3                  |                                               |                                   | 82.7                                    | 3.46 *                            | 82.5                                          | 3.40, m                           | 82.1                                    | 3.33, m                           |
|                      | 4                  |                                               |                                   | 77.2                                    | 3.45 *                            | 83.1                                          | 3.14, t (9.4)                     | 72.8                                    | 3.45, m                           |

|       |      |                                            |      |               |      |               |
|-------|------|--------------------------------------------|------|---------------|------|---------------|
| 5     | 73.9 | 3.58, m                                    | 69.0 | 3.66, m       | 70.0 | 3.68, m       |
| 6     | 62.5 | 3.72, dd (12.0, 5.0);<br>3.84, br d (12.0) | 18.2 | 1.29, d (6.2) | 18.1 | 1.29, d (6.1) |
| 3-OMe | 57.2 | 3.44, s                                    | 57.2 | 3.43, s       | 57.3 | 3.43, s       |
| 4-OMe | 60.8 | 3.52, s                                    | 61.1 | 3.52, s       |      |               |

\* Overlapped



**Table S10. <sup>1</sup>H and <sup>13</sup>C NMR spectral data of 8–11 in CD<sub>3</sub>OD.**

|                     |                      | 8          |                                               | 9          |                                               | 10         |                                  | 11         |                                               |
|---------------------|----------------------|------------|-----------------------------------------------|------------|-----------------------------------------------|------------|----------------------------------|------------|-----------------------------------------------|
|                     |                      | $\delta_C$ | $\delta_H$                                    | $\delta_C$ | $\delta_H$                                    | $\delta_C$ | $\delta_H$                       | $\delta_C$ | $\delta_H$                                    |
| Adenine moiety      | 2                    | 153.1      | 8.24, s                                       | 153.0      | 8.24, s                                       | 153.0      | 8.24, s                          | 153.1      | 8.25, s                                       |
|                     | 4                    | 150.8      |                                               | 150.7      |                                               | 150.1      |                                  | 150.7      |                                               |
|                     | 5                    | 121.7      |                                               | 121.7      |                                               | 121.7      |                                  | 121.7      |                                               |
| Aminopentose moiety | 6                    | 156.4      |                                               | 156.3      |                                               | 156.6      |                                  | 156.3      |                                               |
|                     | 8                    | 139.3      | 8.41, s                                       | 139.3      | 8.41, s                                       | 139.3      | 8.41, s                          | 139.4      | 8.41, s                                       |
|                     | 10-CH <sub>3</sub>   | 39.1       | 3.52, s                                       | 39.1       | 3.49, s                                       | 39.1       | 3.49, s                          | 39.3       | 3.54, br s                                    |
|                     | 1                    | 92.1       | 6.12, d (3.4)                                 | 92.1       | 6.11, d (3.5)                                 | 92.1       | 6.11, d (3.0)                    | 92.1       | 6.12, d (3.2)                                 |
|                     | 2                    | 75.2       | 4.72, dd (5.9, 3.2)                           | 75.2       | 4.71, m                                       | 75.1       | 4.70, m                          | 75.1       | 4.70, dd (6.0, 3.3)                           |
|                     | 3                    | 52.7       | 4.77, m                                       | 52.6       | 4.77, m                                       | 52.6       | 4.77, t (6.5)                    | 52.6       | 4.77, m                                       |
|                     | 3-NH                 |            |                                               |            |                                               |            |                                  |            |                                               |
|                     | 4                    | 85.3       | 4.34, dt (6.7, 2.5)                           | 85.2       | 4.34, m                                       | 85.2       | 4.33, m                          | 85.1       | 4.34, dt (7.0, 2.4)                           |
|                     | 5                    | 62.7       | 4.00, dd (12.4, 1.3);<br>3.84, dd (12.4, 2.5) | 62.6       | 3.96, dd (13.1, 1.7);<br>3.82, dd (13.1, 3.0) | 62.6       | 3.96, dd (12.5, 2.0);<br>3.82, m | 62.6       | 3.99, dd (12.5, 1.5);<br>3.82, dd (12.5, 2.4) |
|                     | Aromatic acid moiety | 1          | 130.6                                         |            | 131.5                                         |            | 130.5                            |            | 131.9                                         |
| 2,6                 |                      | 132.1      | 7.43, d (8.6)                                 | 132.0      | 7.39, dd (8.7, 2.0)                           | 132.1      | 7.39, d (8.5)                    | 132.1      | 7.43, d (8.7)                                 |
| 3,5                 |                      | 118.0      | 7.22, d (8.6)                                 | 117.9      | 7.19, dd (8.7, 2.0)                           | 118.0      | 7.18, d (8.5)                    | 117.9      | 7.22, d (8.7)                                 |
| 4                   |                      | 158.1      |                                               | 158.4      |                                               | 158.8      |                                  | 158.1      |                                               |
| 7                   |                      | 135.0      | 7.35, s                                       | 135.3      | 7.30, s                                       | 135.3      | 7.34, s                          | 135.0      | 7.35, s                                       |
| 8                   |                      | 132.0      |                                               | 132.1      |                                               | 131.3      |                                  | 132.0      |                                               |
| 9                   |                      | 173.2      |                                               | 173.3      |                                               | 173.3      |                                  | 173.3      |                                               |
| 8-CH <sub>3</sub>   |                      | 14.6       | 2.15, s                                       | 14.7       | 2.13, s                                       | 14.7       | 2.13, s                          | 14.6       | 2.15, d (1.2)                                 |
| 1                   |                      | 101.6      | 5.89, d (4.1)                                 | 101.4      | 5.61, d (4.5)                                 | 100.3      | 5.88, d (4.0)                    | 101.5      | 5.89, d (4.1)                                 |
| Hexofuranose moiety | 2                    | 78.4       | 4.23, m                                       | 78.8       | 4.18, dd (7.5, 4.5)                           | 78.7       | 4.18, dd (7.5, 4.0)              | 78.3       | 4.23, dd (5.4, 4.3)                           |
|                     | 3                    | 74.8       | 4.70, br d (10.4)                             | 76.1       | 4.27, t (7.5)                                 | 75.6       | 4.32, t (7.5)                    | 74.7       | 4.78, d (5.5)                                 |
|                     | 4                    | 144.8      |                                               | 83.5       | 3.90, t (7.5)                                 | 83.9       | 3.88, dd (7.5, 4.5)              | 144.8      |                                               |
|                     | 5                    | 134.5      |                                               | 83.0       | 3.37, m                                       | 72.0       | 3.80, m                          | 134.4      |                                               |
|                     | 6                    | 64.5       | 4.44, d (12.5);<br>4.16, d (12.5)             | 67.2       | 3.83, d (11.0); 3.47,<br>d (11.0, 6.0)        | 69.3       | 3.75, m; 3.40, m                 | 64.3       | 4.46, d (12.5);<br>4.15, d (12.5)             |
|                     | 5-OMe                | 59.1       | 3.65, s                                       | 59.7       | 3.33, s                                       |            |                                  | 59.1       | 3.66, s                                       |
| Rhamnose moiety     | 1                    | 101.0      | 4.79, br s                                    | 101.9      | 4.69, d (1.4)                                 | 101.9      | 4.71, d (1.5)                    | 101.1      | 4.81, d (1.2)                                 |
|                     | 2                    | 72.4       | 3.81, m                                       | 68.3       | 4.01, dd (3.1, 1.4)                           | 68.2       | 4.05, dd (2.0, 1.5)              | 72.3       | 3.83, m                                       |
|                     | 3                    | 72.6       | 3.76, dd (9.2, 3.4)                           | 82.5       | 3.40, m                                       | 82.4       | 3.42, m                          | 72.4       | 3.67, m                                       |
|                     | 4                    | 84.5       | 3.11, t (9.2)                                 | 83.1       | 3.12, t (9.4)                                 | 83.1       | 3.13, t (9.5)                    | 74.1       | 3.39, t (9.5)                                 |
|                     | 5                    | 69.0       | 3.66, m                                       | 68.9       | 3.61, m                                       | 68.9       | 3.62, m                          | 70.1       | 3.68, m                                       |
|                     | 6                    | 18.3       | 1.30, d (6.3)                                 | 18.2       | 1.28, d (6.5)                                 | 18.2       | 1.28, d (6.5)                    | 18.1       | 1.30, d (6.5)                                 |
|                     | 3-OMe                |            |                                               | 57.2       | 3.43, s                                       | 57.2       | 3.43, s                          |            |                                               |
|                     | 4-OMe                | 61.0       | 3.56, s                                       | 61.1       | 3.52, s                                       | 61.1       | 3.52, s                          |            |                                               |

**Table S11. Antibacterial activities (MIC, µg/mL) of compounds 1, 2, and 4–11.**

| Compound     | MRSA <sup>a</sup> | MRSE <sup>b</sup> | <i>Klebsiella pneumoniae</i><br>ATCC13883 | <i>Escherichia coli</i><br>ATCC 25922 | <i>Staphylococcus aureus</i> ATCC 29213 | <i>Aeromonas hydrophila</i><br>ATCC 7966 | <i>Micrococcus luteus</i> | <i>Bacillus thuringiensis</i> |
|--------------|-------------------|-------------------|-------------------------------------------|---------------------------------------|-----------------------------------------|------------------------------------------|---------------------------|-------------------------------|
| <b>1</b>     | 2                 | 16                | > 64                                      | > 64                                  | 2                                       | 16                                       | 8                         | 2                             |
| <b>2</b>     | > 64              | > 64              | > 64                                      | > 64                                  | > 64                                    | 64                                       | > 64                      | > 64                          |
| <b>4</b>     | > 64              | 64                | > 64                                      | > 64                                  | > 64                                    | > 64                                     | > 64                      | > 64                          |
| <b>5</b>     | 32                | 32                | > 64                                      | > 64                                  | 32                                      | > 64                                     | > 64                      | 16                            |
| <b>6</b>     | 4                 | 16                | > 64                                      | > 64                                  | 4                                       | 64                                       | 4                         | 2                             |
| <b>7</b>     | 16                | > 64              | > 64                                      | > 64                                  | 16                                      | 64                                       | 64                        | 8                             |
| <b>8</b>     | 8                 | > 64              | > 64                                      | > 64                                  | 8                                       | > 64                                     | 16                        | 4                             |
| <b>9</b>     | 32                | 32                | > 64                                      | > 64                                  | 32                                      | 32                                       | > 64                      | 8                             |
| <b>10</b>    | 64                | 32                | > 64                                      | > 64                                  | > 64                                    | 64                                       | > 64                      | 64                            |
| <b>11</b>    | > 64              | 64                | > 64                                      | > 64                                  | 64                                      | > 64                                     | > 64                      | > 64                          |
| Ampicillin   | > 64              | 8                 | > 64                                      | 8                                     | 4                                       | > 128                                    | <0.125                    | 8                             |
| Erythromycin | > 64              | 2                 | 32                                        | 64                                    | 0.25                                    | 32                                       | 0.25                      | 0.25                          |
| Vancomycin   | 1                 | 2                 | > 64                                      | > 64                                  | 1                                       | > 64                                     | 0.5                       | 0.5                           |

<sup>a</sup>MRSA: methicillin-resistant *Staphylococcus aureus* (clinical isolate shhs-A1)

<sup>b</sup>MRSE: methicillin-resistant *Staphylococcus epidermidis* (clinical isolate shhs-E1)

Supplementary Figures S1–S91

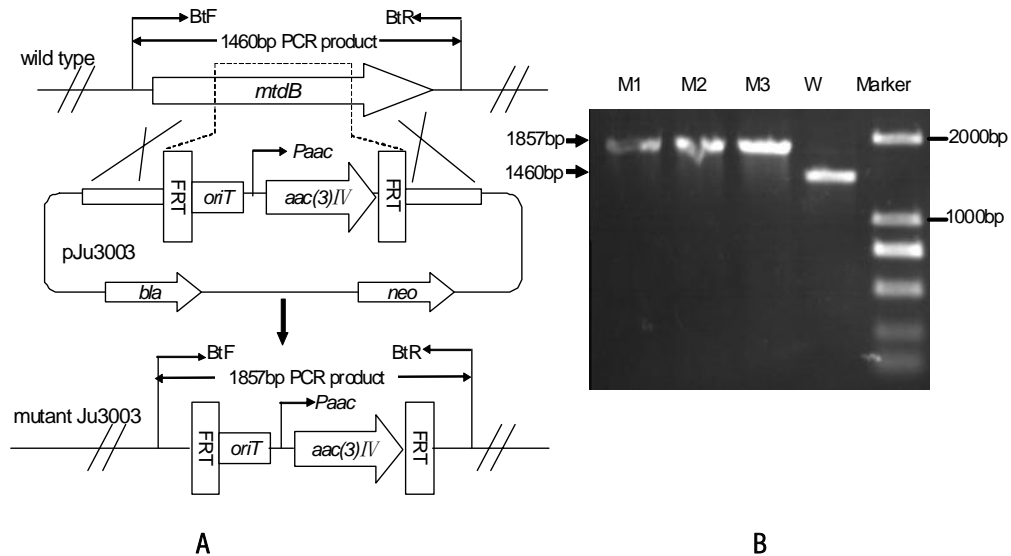

**Fig. S1.** Construction and gel electrophoresis analyses of mutant  $\Delta mtdB$  (Ju3003). (A) Construction of mutant strain  $\Delta mtdB$  and predicted PCR fragment size from wild-type and mutant; (B) Verification of the  $\Delta mtdB$  mutant by PCR. DNA templates were from *M. thermotolerans* SCSIO 00652 (lane W) and  $\Delta mtdB$  (lane M1, M2, M3). Marker, DNA marker DL2000.

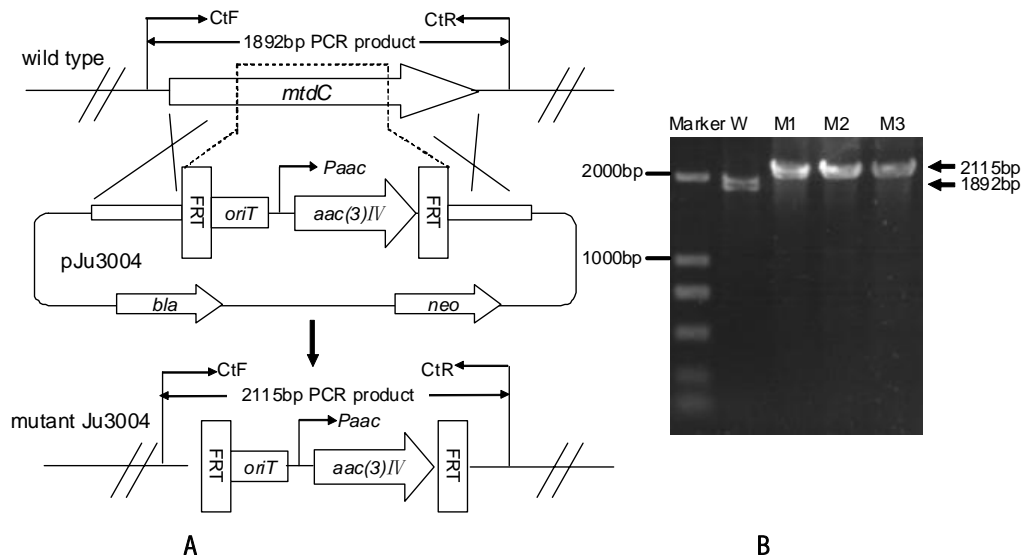

**Fig. S2.** Construction and gel electrophoresis analyses of mutant  $\Delta mtdC$  (Ju3004). (A) Construction of mutant  $\Delta mtdC$  and predicted PCR fragment size from wild-type and mutant; (B) Verification of the  $\Delta mtdC$  mutant by PCR. DNA templates were from *M. thermotolerans* SCSIO 00652 (lane W) and  $\Delta mtdC$  (lane M1, M2, M3). Marker, DNA marker DL2000.

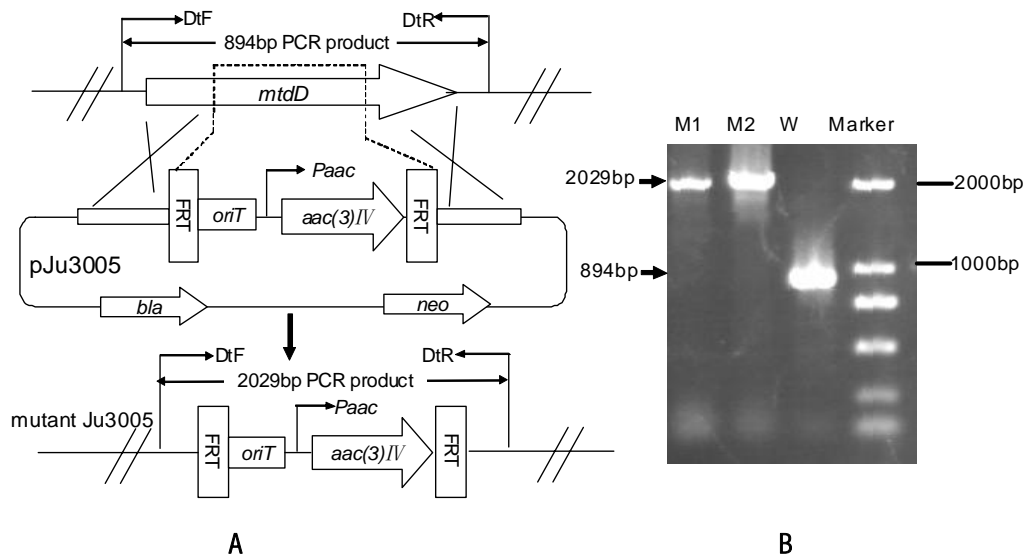

**Fig. S3.** Construction and gel electrophoresis analyses of mutant  $\Delta mtdD$  (Ju3005). (A) Construction of mutant  $\Delta mtdD$  and predicted PCR fragment size from wild-type and mutant; (B) Verification of the  $\Delta mtdD$  mutant by PCR. DNA templates were from *M. thermotolerans* SCSIO 00652 (lane W) and  $\Delta mtdD$  (lane M1, M2). Marker, DNA marker DL2000.

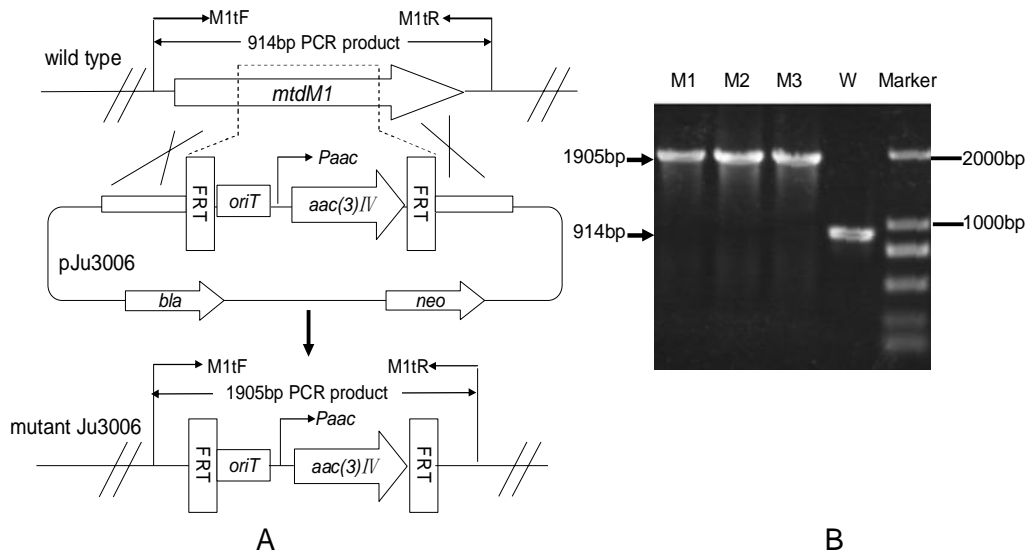

**Fig. S4.** Construction and gel electrophoresis analyses of mutant  $\Delta mtdM_1$  (Ju3006). (A) Construction of mutant  $\Delta mtdM_1$  and predicted PCR fragment size from wild-type and mutant; (B) Verification of the  $\Delta mtdM_1$  mutant by PCR. DNA templates were from *M. thermotolerans* SCSIO 00652 (lane W) and  $\Delta mtdM_1$  (lane M1, M2, M3). Marker, DNA marker DL2000.

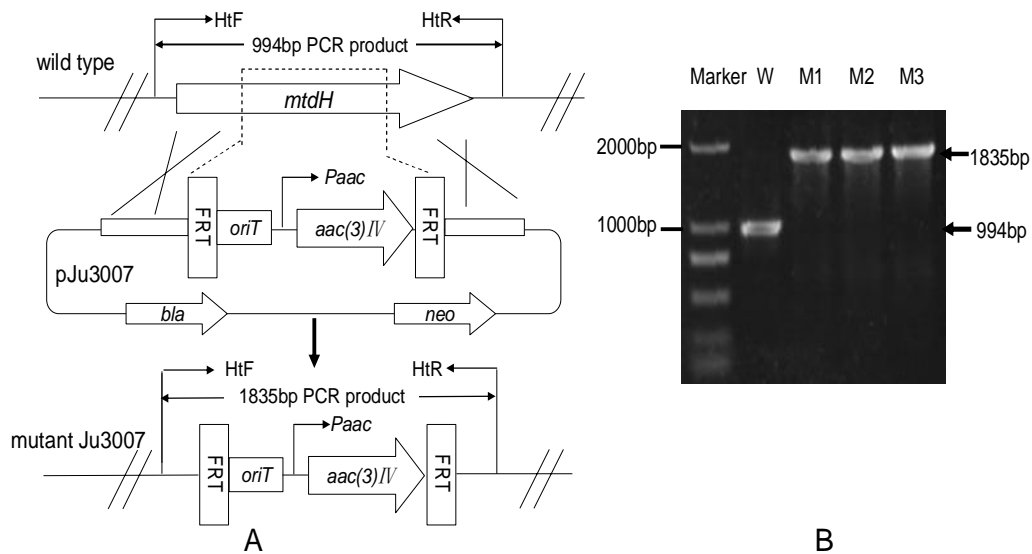

**Fig. S5.** Construction and gel electrophoresis analyses of mutant  $\Delta mtdH$  (Ju3007). (A) Construction of mutant  $\Delta mtdH$  and predicted PCR fragment size from wild-type and mutant; (B) Verification of the  $\Delta mtdH$  mutant by PCR. DNA templates were from *M. thermotolerans* SCSIO 00652 (lane W) and  $\Delta mtdH$  (lane M1, M2, M3). Marker, DNA marker DL2000.

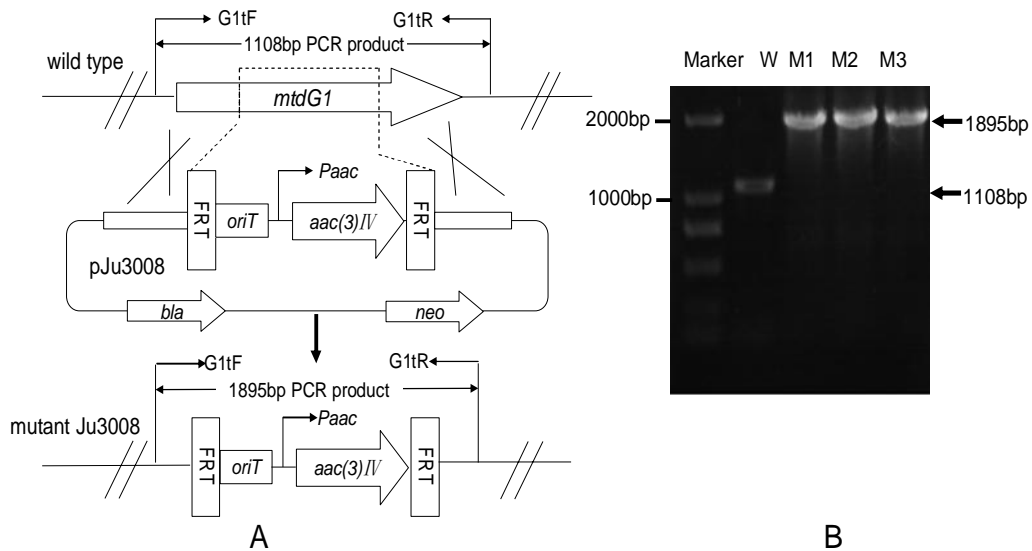

**Fig. S6.** Construction and gel electrophoresis analyses of mutant  $\Delta mtdG_1$  (Ju3008). (A) Construction of mutant  $\Delta mtdG_1$  and predicted PCR fragment size from wild-type and mutant; (B) Verification of the  $\Delta mtdG_1$  mutant by PCR. DNA templates were from *M. thermotolerans* SCSIO 00652 (lane W) and  $\Delta mtdG_1$  (lane M1, M2, M3). Marker, DNA marker DL2000.

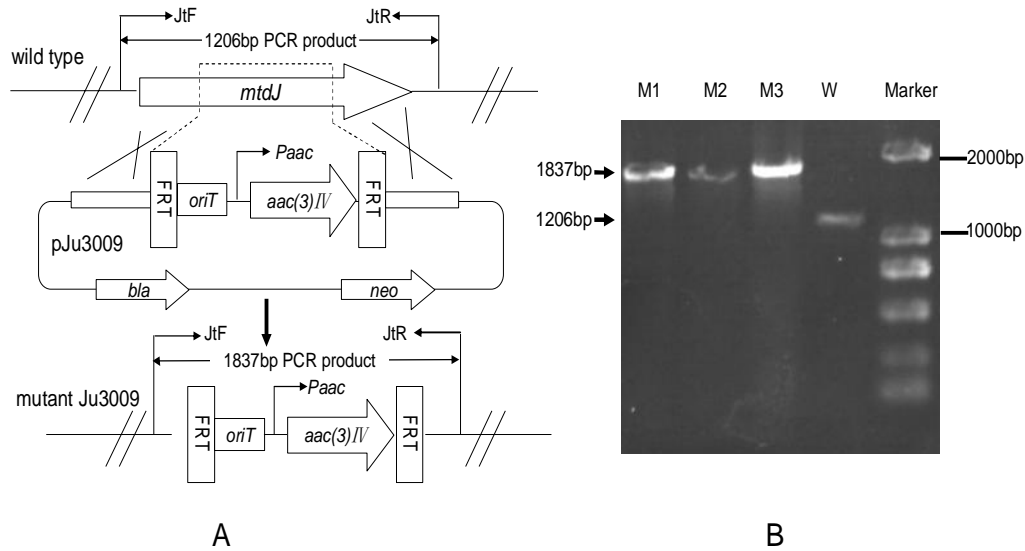

**Fig. S7.** Construction and gel electrophoresis analyses of mutant  $\Delta mtdJ$  (Ju3009). (A) Construction of mutant  $\Delta mtdJ$  and predicted PCR fragment size from wild-type and mutant; (B) Verification of the  $\Delta mtdJ$  mutant by PCR. DNA templates were from *M. thermotolerans* SCSIO 00652 (lane W) and  $\Delta mtdJ$  (lane M1, M2, M3). Marker, DNA marker DL2000.

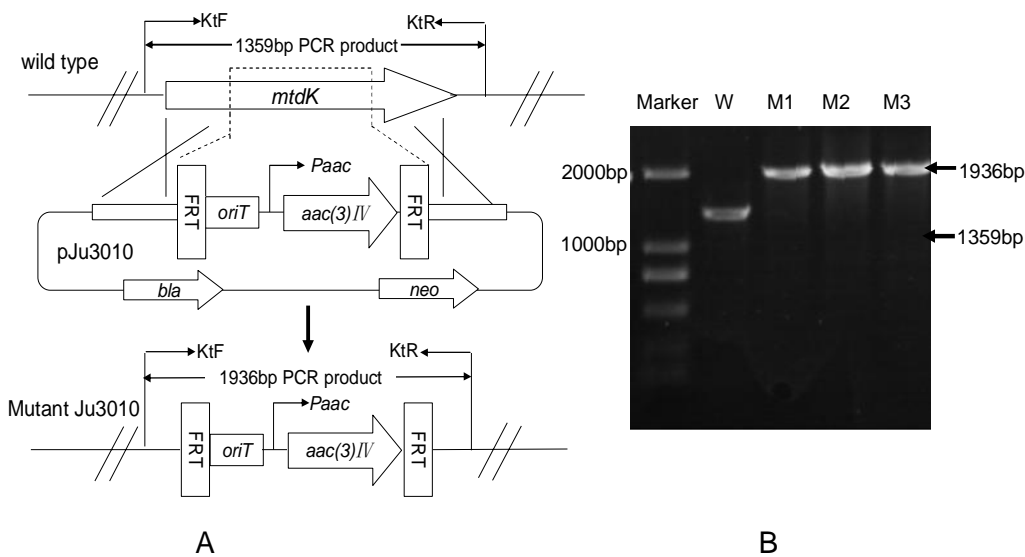

**Fig. S8.** Construction and gel electrophoresis analyses of mutant  $\Delta mtdK$  (Ju3010). (A) Construction of mutant  $\Delta mtdK$  and predicted PCR fragment size from wild-type and mutant; (B) Verification of the  $\Delta mtdK$  mutant by PCR. DNA templates were from *M. thermotolerans* SCSIO 00652 (lane W) and  $\Delta mtdK$  (lane M1, M2, M3). Marker, DNA marker DL2000.

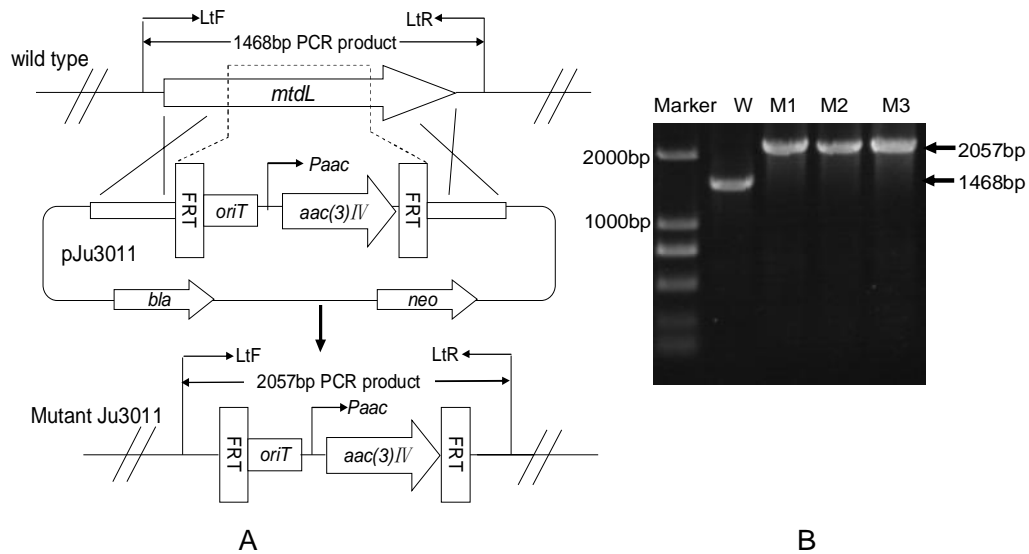

**Fig. S9.** Construction and gel electrophoresis analyses of mutant  $\Delta mtdL$  (Ju3011). (A) Construction of mutant  $\Delta mtdL$  and predicted PCR fragment size from wild-type and mutant; (B) Verification of the  $\Delta mtdL$  mutant by PCR. DNA templates were from *M. thermotolerans* SCSIO 00652 (lane W) and  $\Delta mtdL$  (lane M1, M2, M3). Marker, DNA marker DL2000.

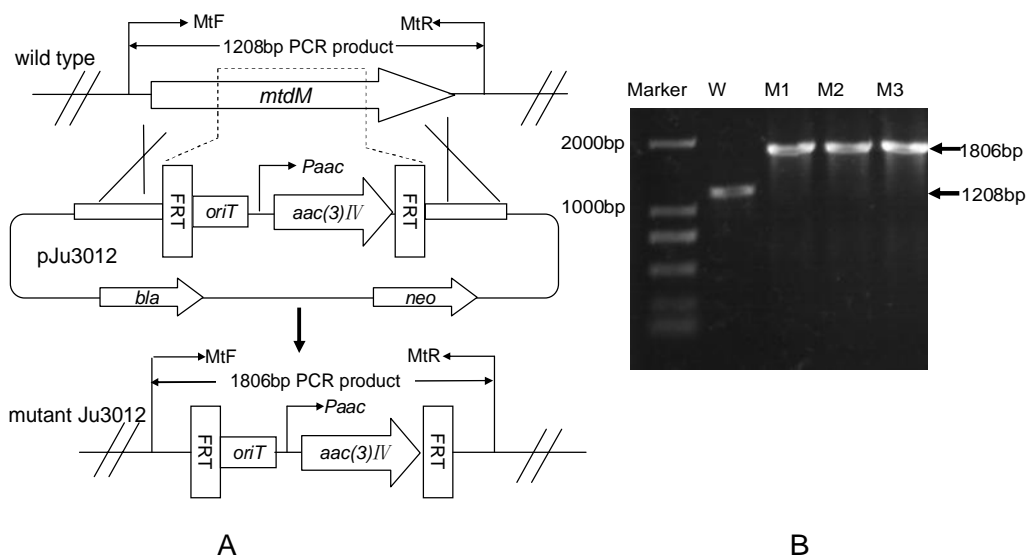

**Fig. S10.** Construction and gel electrophoresis analyses of mutant  $\Delta mtdM$  (Ju3012). (A) Construction of mutant  $\Delta mtdM$  and predicted PCR fragment size from wild-type and mutant; (B) Verification of the  $\Delta mtdM$  mutant by PCR. DNA templates were from *M. thermotolerans* SCSIO 00652 (lane W) and  $\Delta mtdM$  (lane M1, M2, M3). Marker, DNA marker DL2000.

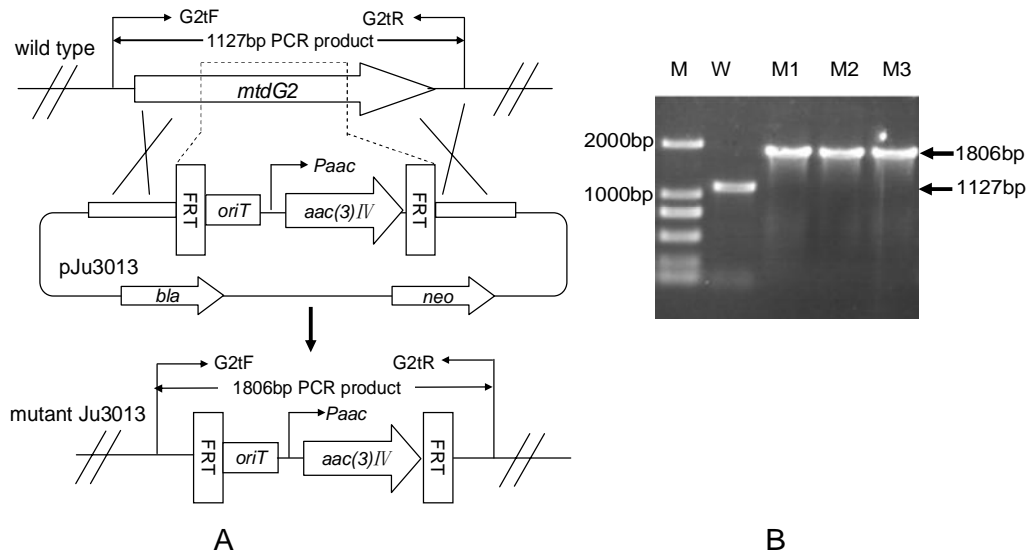

**Fig. S11.** Construction and gel electrophoresis analyses of mutant  $\Delta mtdG_2$ (Ju3013). (A) Construction of mutant  $\Delta mtdG_2$  and predicted PCR fragment size from wild-type and mutant; (B) Verification of the  $\Delta mtdG_2$  mutant by PCR. DNA templates were from *M. thermotolerans* SCSIO 00652 (lane W) and  $\Delta mtdG_2$  (lane M1, M2, M3). M, DNA marker DL2000.

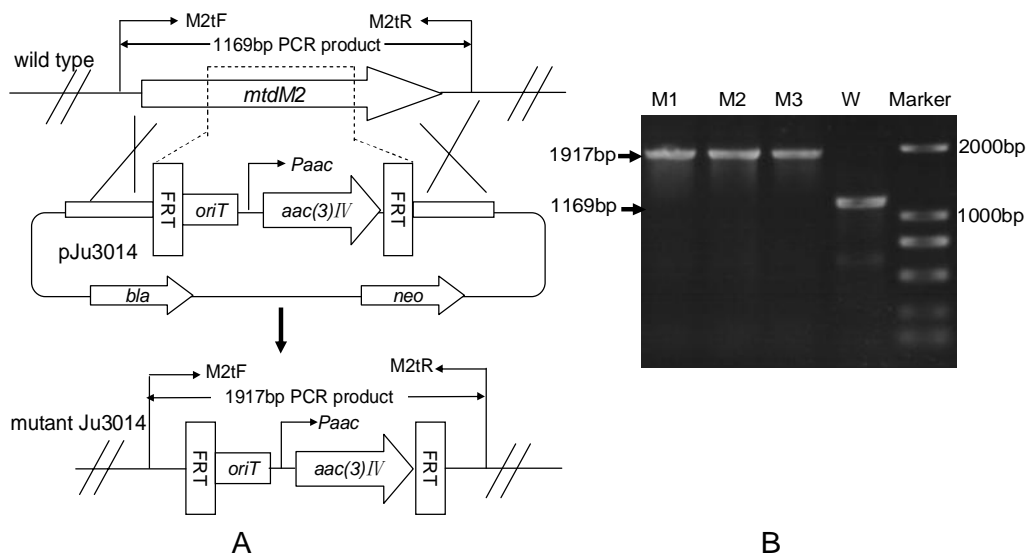

**Fig. S12.** Construction and gel electrophoresis analyses of mutant  $\Delta mtdM_2$  (Ju3014). (A) Construction of mutant  $\Delta mtdM_2$  and predicted PCR fragment size from wild-type and mutant; (B) Verification of the  $\Delta mtdM_2$  mutant by PCR. DNA templates were from *M. thermotolerans* SCSIO 00652 (lane W) and  $\Delta mtdM_2$  (lane M1, M2, M3). Marker, DNA marker DL2000.



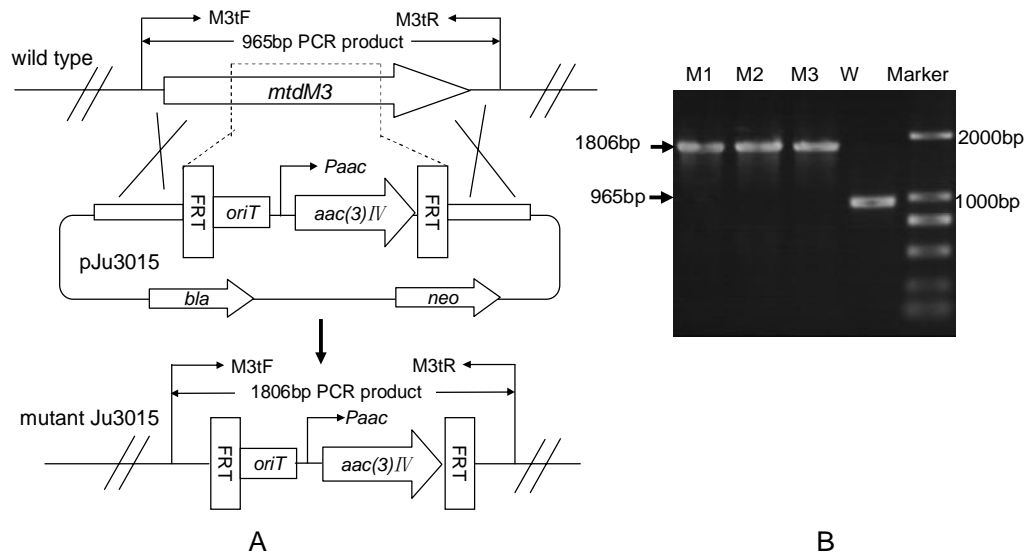

**Fig. S13.** Construction and gel electrophoresis analyses of mutant  $\Delta mtdM_3$  (Ju3015). (A) Construction of mutant  $\Delta mtdM_3$  and predicted PCR fragment size from wild-type and mutant; (B) Verification of the  $\Delta mtdM_3$  mutant by PCR. DNA templates were from *M. thermotolerans* SCSIO 00652 (lane W) and  $\Delta mtdM_3$  (lane M1, M2, M3). Marker, DNA marker DL2000.

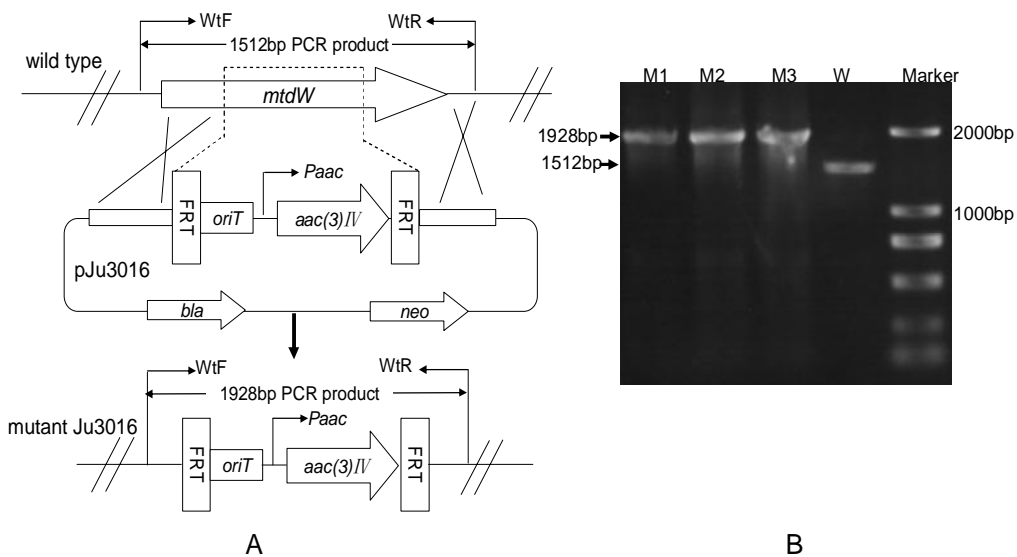

**Fig. S14.** Construction and gel electrophoresis analyses of mutant  $\Delta mtdW$  (Ju3016). (A) Construction of mutant  $\Delta mtdW$  and predicted PCR fragment size from wild-type and mutant; (B) Verification of the  $\Delta mtdW$  mutant by PCR. DNA templates were from *M. thermotolerans* SCSIO 00652 (lane W) and  $\Delta mtdW$  (lane M1, M2, M3). Marker, DNA marker DL2000.

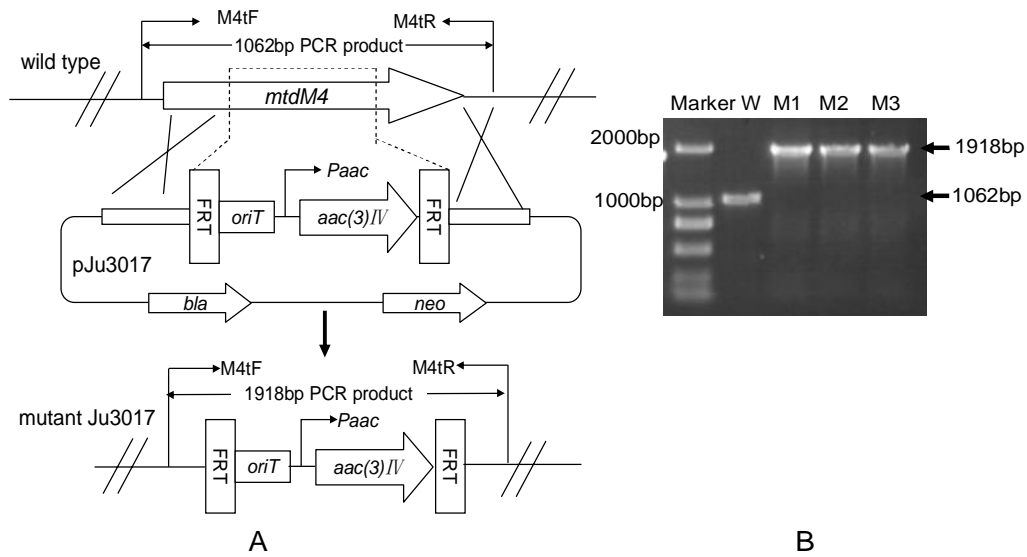

**Fig. S15.** Construction and gel electrophoresis analyses of mutant  $\Delta mtdM_4$  (Ju3017). (A) Construction of mutant  $\Delta mtdM_4$  and predicted PCR fragments size from wild-type and mutants; (B) Verification of the  $\Delta mtdM_4$  mutants by PCR. DNA templates were from *M. therm-otolerans* SCSIO 00652 (lane W) and  $\Delta mtdM_4$  (lane M1, M2, M3). Marker, DNA marker DL2000.

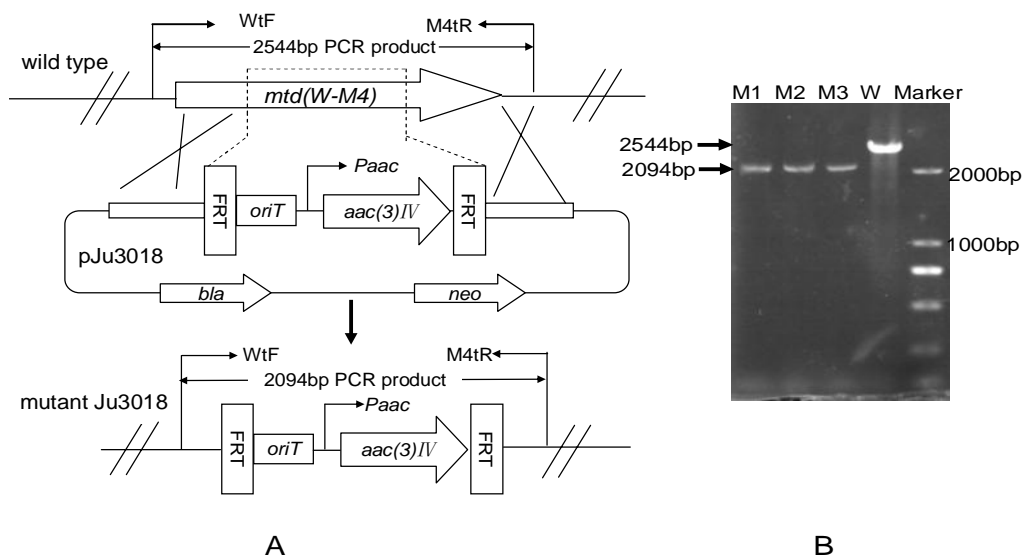

**Fig. S16.** Construction and gel electrophoresis analyses of mutant  $\Delta mtdWM_4$  (Ju3018). (A) Construction of mutant  $\Delta mtdWM_4$  and predicted PCR fragment size from wild-type and mutant; (B) Verification of the  $\Delta mtdWM_4$  mutant by PCR. DNA templates were from *M. thermotolerans* SCSIO 00652 (lane W) and  $\Delta mtdWM_4$  (lane M1, M2, M3). Marker, DNA marker DL2000.

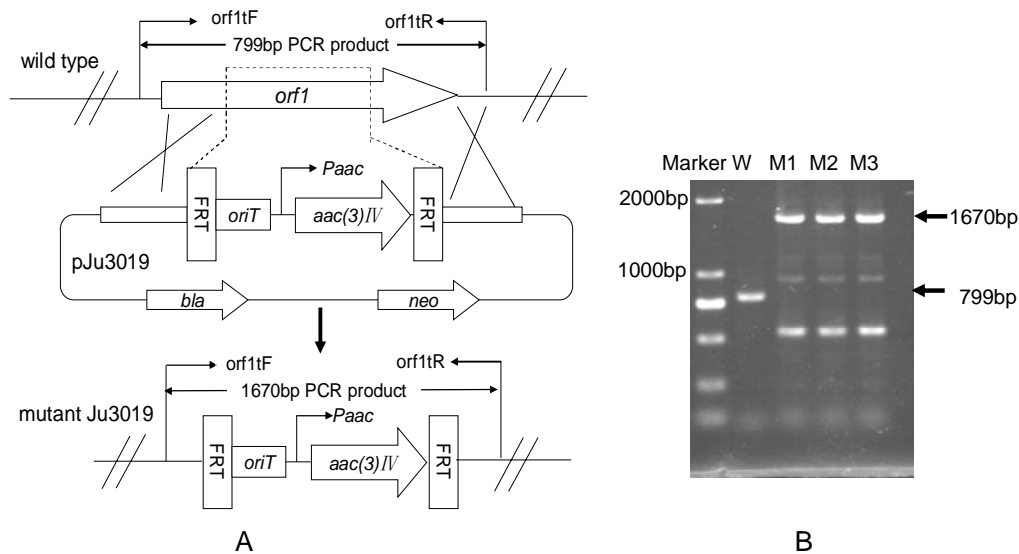

**Fig. S17.** Construction and gel electrophoresis analyses of mutant  $\Delta orf1$  (Ju3019). (A) Construction of mutant  $\Delta orf1$  and predicted PCR fragment size from wild-type and mutant; (B) Verification of the  $\Delta orf1$  mutants by PCR. DNA templates were from *M. thermotolerans* SCSIO 00652 (lane W) and  $\Delta orf1$  (lane M1, M2, M3). Marker, DNA marker DL2000.

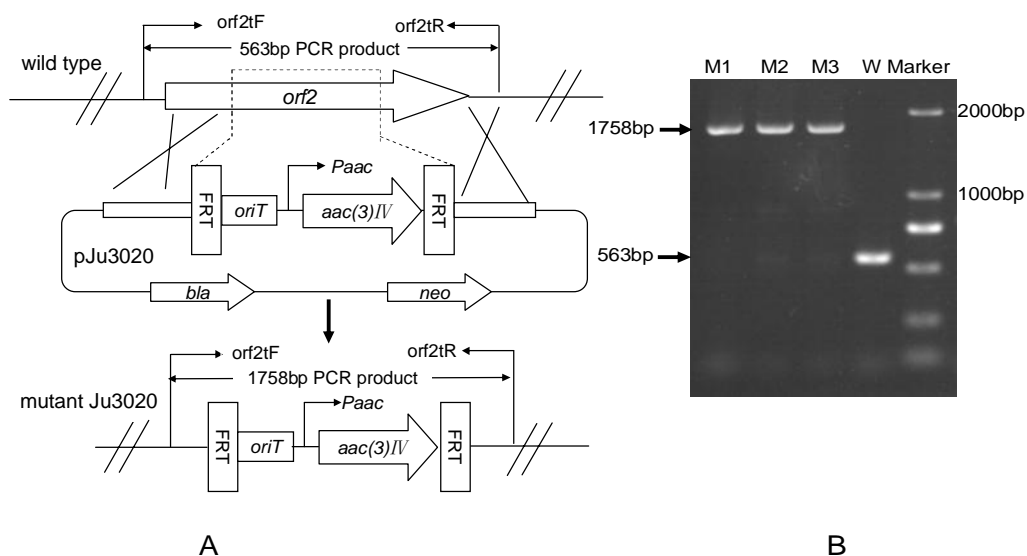

**Fig. S18.** Construction and gel electrophoresis analyses of mutant  $\Delta orf2$  (Ju3020). (A) Construction of mutant  $\Delta orf2$  and predicted PCR fragment size from wild-type and mutant; (B) Verification of the  $\Delta orf2$  mutants by PCR. DNA templates were from *M. thermotolerans* SCSIO 00652 (lane W) and  $\Delta orf2$  (lane M1, M2, M3). Marker, DNA marker DL2000.

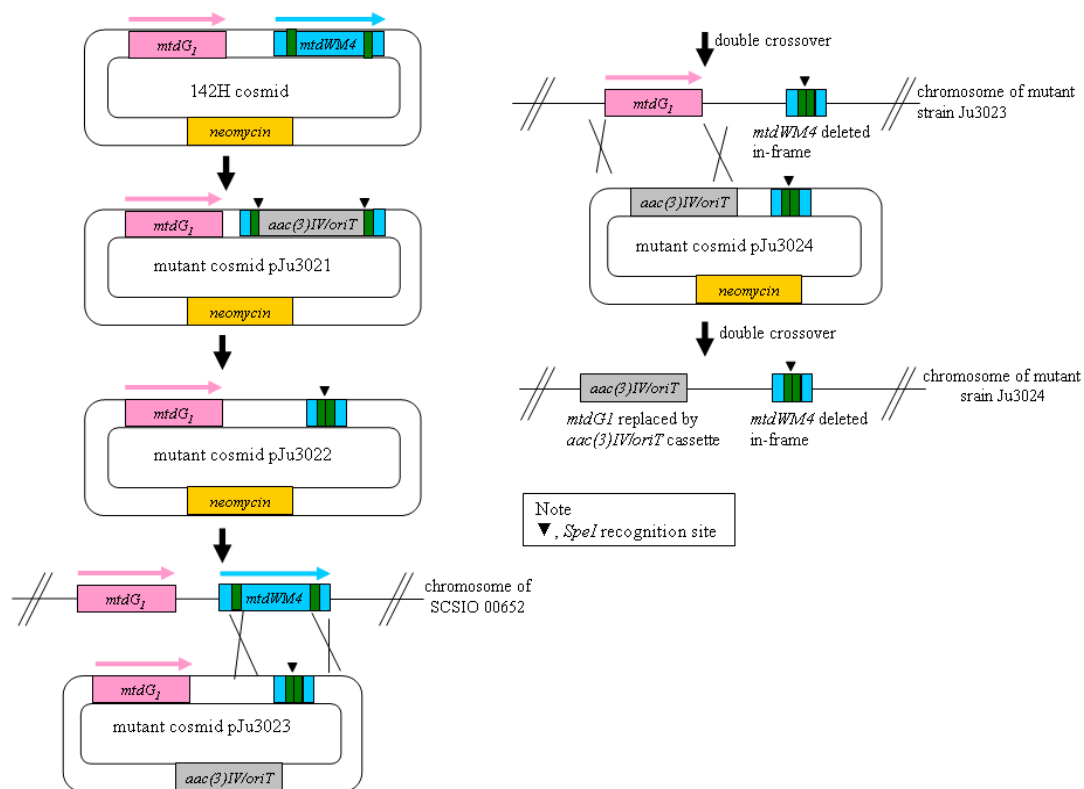

**Fig. S19.** Diagram showing construction strategy for mutant  $\Delta mtdG_1WM_4$ .

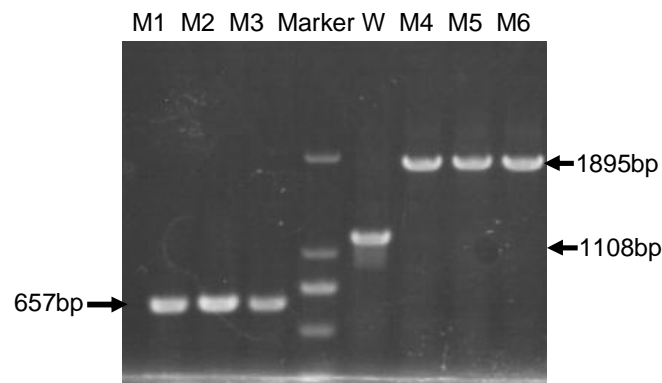

**Fig. S20.** PCR verification of the mutant  $\Delta mtdG_1WM_4$  (Ju3024). The whole construction process was shown in Fig. S19. On the one hand, the gene  $\Delta mtdWM_4$  was in-frame deleted, PCR using the primers WtF2 and M4tR was speculated to result in the amplification of a 657 bp fragment (lane M1, M2 and M3). On the other hand, the gene *mtdG<sub>1</sub>* was replaced by *aac(3)IV-oriT* fragment. Sizes of PCR products, using the primers G1tF and G1tR, was expected to be 1108 bp for the wild type strain *M. thermotolerans* SCSIO 00652(lane W) and 1895 bp for the mutants (lane M4, M5 and M6).

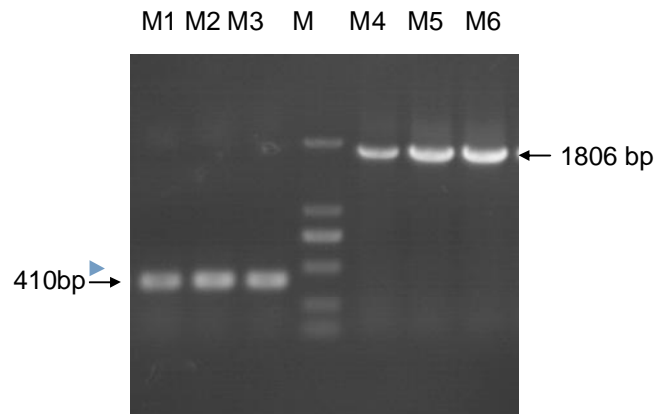

**Fig. S21.** PCR verification of the mutant  $\Delta mtdM_2M_3$  (Ju3025). The whole construction process was the same as the mutants of  $\Delta mtdG_1WM_4$  (Ju3024) shown in Fig. S19. On the one hand, the gene *mtdM<sub>2</sub>* was in-frame deleted; PCR using the primers M2tF and M2tR was speculated to result in the amplification of a 410 bp fragment (lane M1, M2 and M3). On the other hand, the gene *mtdM<sub>3</sub>* was replaced by *aac(3)IV-oriT* fragment. Sizes of PCR products, using the primers M3tF and M3tR, was expected to be 1806 bp for the mutants (lane M4, M5 and M6).

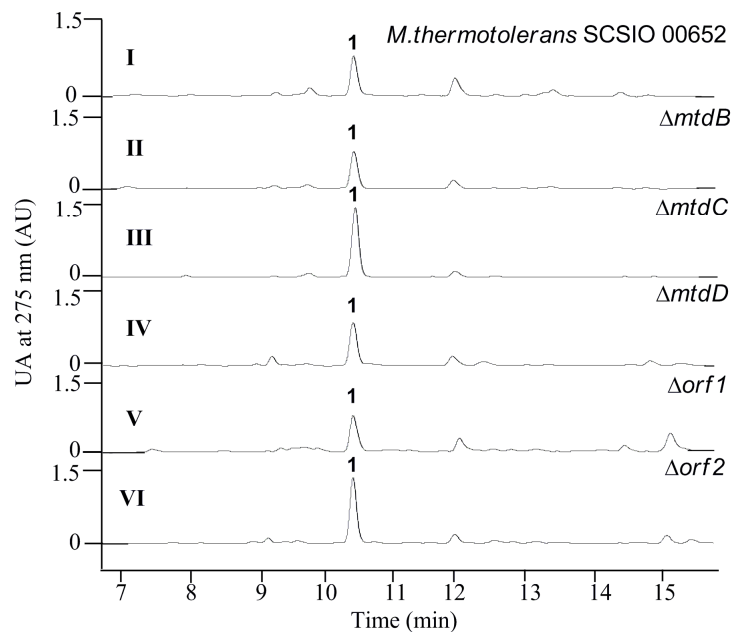

**Fig. S22.** Metabolite profiles of *M. thermotolerans* SCSIO 00652 mutant strains (II-VI), in comparison with the wild-type (I).

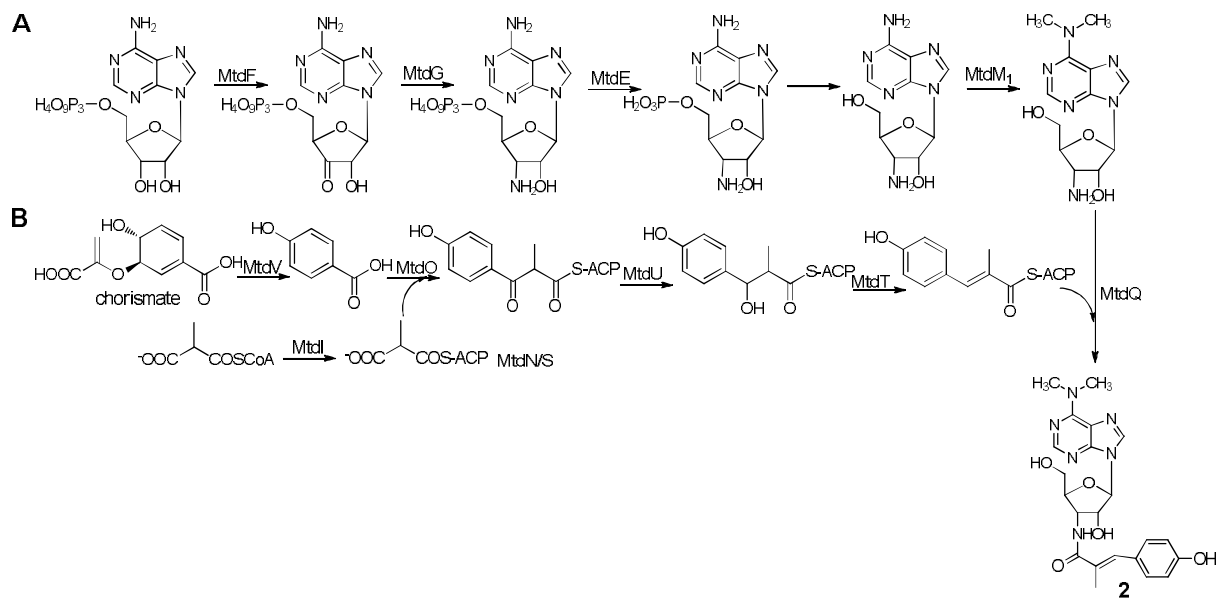

**Fig. S23.** The proposed biosynthetic pathway of *N, N*-dimethyl-3'-amino-3'-deoxyadenosine moiety and *p*-hydroxy- $\alpha$ -methylcinnamic acid moiety *en route* to **2**.

MtdL -----MSGRDIS-TAVVVTI SDG-GFLDRLAPALRDAGA----RLVI P  
 Ata16 MPDHEPAI PADRAADAASDLRSTHI VLTTI SDG-GFLDRFAPALRDSGA----RLTVI P  
 Hyg20 -----MS----ETIDI VMTTI GSG-SFLDHFADALAEEGA----RLVVI P  
 UAM1 --MAGTVTVPSASVPSTPLLKDELDI VIPTI RN-LDFLEMWRPFQF-----YHLI I VQ  
 UAM3 --MAS--SDAAAAQAATPLLKDELDI VIPTI RN-LDFLEMWRPFQF-----YHLI I VQ  
 WP\_030831156.1 -----MS----ETIDI VMTTI GSG-SFLDHFADALAEEGA----RLVVI P  
 WP\_029381493.1 -----MS----ETIDI VMTTI GSG-TFLEHFTEALAEEDGA----RLVVI P  
 WP\_055557796.1 -----MS----ETIDI VMTTI GSG-SFLDHYTDALAEEDGA----RLVVI P  
 WP\_018505382.1 -----MSDSSGSTVDI VI TTI GSG-EFLEQFTGTLTEDGA----RLVVI P  
 WP\_004951028.1 -----MS----ETIDI VI TTI GSG-EFLEHYADTLAEEDGA----RLVVI P  
 WP\_007071477.1 -----MSEP-LPRVDV VMTTI GDGEAFLSAYRTLGAADAYRRVRI VVI P  
 :\*:.\*\* . \*\* . : : : :

MtdL DRNTGPALFAACERHRRGLDVVCPVSAEQQDL LERLAVPDLI PYHSDNRRNVGYLMAWM  
 Ata16 DRNTPPGLFAACERQRNGLDVVCPVTEEQQEL LDSLGAPELI PYASDNRRNVGYLLAWL  
 Hyg20 DRKTPSTFYEACERARRGATI VAPDVEEQDRL LAKLGI PDLI PYSDNRRNI GYLLSYL  
 UAM1 DGDPTKTI RVP-----EGFDYELYNRNDI NRI LG--PKASCI SFKDSACRCFGYMVSKK  
 UAM3 DGDPKKTI RVP-----EGFDYELYNRDDI NRI LG--PRASCI SFKDSACRCFGYMVSKK  
 WP\_030831156.1 DRKTPSTFYDACERARRGATI VAPDVEEQDRL LAKLGI PDLI PYSDNRRNI GYLLSYL  
 WP\_029381493.1 DRKTPRAFYDACERARRGATVVPDVEEQDRL LAKLGV PDLI PYSDNRRNI GYLLSYL  
 WP\_055557796.1 DRKTPSAFYDACERARRGATI VAPDVEEQDRL LAKLGI PDLI PCSDNRRNI GYLLSYM  
 WP\_018505382.1 DRKTPAALYQACDRARARGASI VAPDVEEQDRL LAKLGVPELI PYSDNRRNI GYLLSYL  
 WP\_004951028.1 DRRTPAAFHAACDRARARGAAI LSPDVAEQDRL LAKLGVPELVPYSDNRRNI GYLLSYL  
 WP\_007071477.1 DRKTPAALFDAVERARRDGLHVVCPTVAEQDAL LAGLGAPTLI PYSDNRRNVGYLLSWQ  
 \* . : . \* : : : \* . : . \* . \* : :

**DxD.....R**

MtdL EGF DVI VSMDDNLPTTDDFVERHQVVCQGPRTQPVTASSDGFNNCALLEVEPTEVFP  
 Ata16 QEA E VVI SMDDNLPRDPDFVRRHQVVRQGMRVQPVTTSATGWFNNCALLKTEPVDVFP  
 Hyg20 NDSALAVSMDDNL PVD RPF LDEHRI VLOGPARHRVVSAGNGWFNACDLLTVSPCRVFP  
 UAM1 ---KYVFTI DDCCFVAKD--PSGKDI NALEQHI KNLLSPSTPFFNTLYDPYREGADFV  
 UAM3 ---KYI YTI DDCCFVAKD--PSGKDI NALEQHI KNLLNPSTPFFNTLYDPYRDGADFV  
 WP\_030831156.1 NDSALAVSMDDNL PADRPF LDEHRV VLOGPARHRVVSADNGWFNACDLLTVSPCRVFP  
 WP\_029381493.1 NGSALAVSMDDNL PVDHPFLDEHRV VLRGPARHRTVSAANGWFNACDLLTVTPCRVFP  
 WP\_055557796.1 NDSALAVSMDDNL PVASPF LDEHRI VLRGPTRHRVSVGNGWFNACDLLTVSPCRVFP  
 WP\_018505382.1 NDSAFVAVSMDDNL PVDSPFLDEHRI VAAGPTEQRVVSNSDGFNACDLLTVEPCRVFP  
 WP\_004951028.1 NGSACAVSMDDNL PAVSPFLDEHRV VLEGPARHRTVSSPSGWFNCCDLLDVTPCRVHP  
 WP\_007071477.1 SDADFLI SVDDNFPI DGDFLTAHAVVAAGPRPARVVTAE SGWNPCGQLTVAPMPVYP  
 : : \* \* \* : : : : : : \*

MtdL GFPFHARPAHAQARTSVCPADVRI NAGLWLGDPDVDAI TRLAVR-PNALAHSGGSVVL  
Ata16 GFPLRHRATYDETALTTTRQPADVRVNAGLWLGDPDVDAI TRVAVR-PEVTAHAGGNAVL  
Hyg20 GFPYAPRT--AGTEVTSTEEADVVRNAGLWLDPPDVDAI TRLAVR-PRVTAYGGEAAVL  
UAM1 GYPFSLR-----EGAKTAVSHGLWLNIPDYDAPTMKPRERNSRYVDAMTV  
UAM3 GYPFSLR-----EGAPTAVSHGLWLNIPDYDAPTQLVKPLERNSRYVDAMTV  
WP\_030831156.1 GFPYAPRT--AGTEVTSTEEADVVRNAGLWLDPPDVDAI TRLAVR-PRVTAYGGEAAVL  
WP\_029381493.1 GFPYGPQV--EHTEVTRTEEVADVVRNAGLWLDPPDVDAVTRLAVR-PQVTAYSGEAVVM  
WP\_055557796.1 GFPYAPRE--AGTEVTSTEEVDVVRNAGLWLDPPDVDAVTRLAVR-PRVTAYGGEAAVL  
WP\_018505382.1 GFPYGPPE--ASTELTETTRSDVVRNAGLWLDPPDVDAVTRLAVR-PRVTGYERGTAIV  
WP\_004951028.1 GFPYGPRT--DPAAPTWTEETADVVRNAGLWLGDPDVDAVTRLAVR-PTVTAYRGPAAVL  
WP\_007071477.1 GFPYAHRS---PTPTSERTETVDVRI NAGLWLGDPDVDAI TRIAVR-PEVTAMPAPALVC  
\* . \* \* . . . . . : . \* \* \* . \* \* \* \* : . .

MtdL AEGTWCVPVNSQNTAVHRDAL-PAYYFLRMGQVPDGVPMERFGDISGIFYVQVCAQHLGHA  
Ata16 GRGTWCVPVNSQNTALHRDAL-PAYYFLRMGQVRGGVMERFGDISGIFYLQACAQHLGHA  
Hyg20 APDTWCVPVNSQNTAVHHDAL-PAYYFLRMGQSI GGAPVERFGDISGIFYVAAACAKHLGHA  
UAM1 PKGTLFPMCMMNLAFDRDLI GPAMYFGLMGD---GQPI GRYDMMWAGWCMKVI CDHLSLG  
UAM3 PKGTLFPMCMMNLAFDRDLI GPAMYFGLMGD---GQPI GRYDMMWAGWCTKVI TDHLLGLG  
WP\_030831156.1 APDTWCVPVNSQNTAVHHDAL-PAYYFLRMGQSI GGAPVERFGDISGIFYVAAACAKHLGHA  
WP\_029381493.1 ARDTWCVPVNSQNTAVHRDAL-PAYYFLRMGQPI GGAVERFGDISGIFYVAAACAKHLGHA  
WP\_055557796.1 AGDTWCVPVNSQNTAVHHDAL-PAYYFLRMGQSI GGATVERFGDISGIFYVAAACAKHLGHA  
WP\_018505382.1 AADTWCVPVNSQNTAVHHDAL-AAYYFLRMGQPI YGAPVERFGDISGIFYVAAACAKHLGHA  
WP\_004951028.1 ARDTWCVPVNSQNTAVHRDAL-PAYYFLRMGQVPGAPLERFGDISGIFYLAACKHLGHS  
WP\_007071477.1 DTGTWAPVNSQNTAVHRDAI-PAYYFPRMGYRHHGQEI DRYADI SGIFYVQACAKRLGHA  
\* . \* . . : \* \* . . \* : . \* \* \* \* \* \* \* : \* : \* : \* : \* : . . : \* .

MtdL VRFQDPPVEHPRNEHDLDDLHKEVPAVRLLDDILDHLRDHPL--EGGDYLETYESLSYA  
Ata16 VRFQDPLVDHPRNEHDLDDLTKELPAVRLLDDLDDWLRECPL--EGGDYFTAYEALSHG  
Hyg20 VRFQDPLVNHQRNDHDLDDLAI ELPARFMDELLEWLEFPFI--EGSDYRESYESLSYG  
UAM1 VKTGLPYI WSKASNPFVN-LKKEYKGI FWQEDI I PFFQNTAT I PKECDTVQKCYLSLAEQ  
UAM3 VKTGLPYI WSKASNPFVN-LKKEYNGI FWQEELI PFFQSASLPKEADTVQKCYLELAKQ  
WP\_030831156.1 VRFQDPLVNHQRNDHDLDDLAI ELPARFMDELLEWLEFPFI--EGSDYRESYESLSYG  
WP\_029381493.1 VRFQDPLVNHQRNDHDLDDLAI ELPARFMDELLEWLEFPFI--EGSDYRESYESLSYG  
WP\_055557796.1 VRFQDPLVNHQRNDHDLDDLAI ELPARFMDELLEWLEFPFI--EGSDYRESYESLSYG  
WP\_018505382.1 VRFQDPLVNHQRNDHDLDDLAI ELPARFMDELLEWLEFPFI--EGSDYRESYESLSYG  
WP\_004951028.1 VRFQDPLVNHQRNDHDLDDLAI ELPARFMDELLEWLEFPFI--EGSDYRESYESLSYG  
WP\_007071477.1 VRFQDPLVNHQRNDHDLDDLAI ELPARFMDELLEWLEFPFI--EGSDYRESYESLSYG  
\* : \* \* \* \* : : : \* \* . . : : : : : : . . . \* \*



```

MtdL      LQEI AERVNGRA-WSPDARAFLHRSSAHLMRSWTGALRTVACT-----
Ata16     LQDFAEEASGPA-WTADARAFLHRSSAHLMRTWLGVLRVGAGA-----
Hyg20     LQDFAEQARGRG-WTPDARAFLHRSSAHLMRTWLTAI RRVHGG-----
UAM1      VREKLGKI DPYFVKLADAMVTWI EAWDELNPSTAAVE--NGKAK---
UAM3      VRAKLGKVDGYFNKLADSMVTWI EAWDQLNPPKGAVATANGTAKSK-
WP_030831156.1 LQDFAEQARGRG-WTPDARAFLHRSSAHLMRTWLTAI RRVHGG-----
WP_029381493.1 LQDFAEQAGGRA-WTPEARAFLHRSAHMRTWLSAVRRIDGR-----
WP_055557796.1 LQDFAEQARGRG-WTPDARAFLHRSSAHLMRTWLTAI RRVNGS-----
WP_018505382.1 LQDFAEAAQGGK-YTPEARAFLHRSAHMRTYLRAI RAI DGS-----
WP_004951028.1 LREFAEQARGPA-WTQDARAFLHRSAHLMLTWLSAVRRIDGG-----
WP_007071477.1 LQDAVEAMSGRV-WTHELRGFVHQMAHLMROWVGVLORCHGAGGTPA
          ::          :          .          .          :          .          :          *

```

**Fig. S24.** Multiple sequence alignments of MtdL with its homologues (Ata16, Hyg20, UAM1, UAM3, WP\_030831156.1, WP\_029381493.1, WP\_055557796.1, WP\_018505382.1, WP\_004951028.1, WP\_007071477.1). The following proteins (with GenBank IDs) were used for amino acid alignment: Ata16 (CAD62189.1) from *Saccharothrix mutabilis* subsp. capreolus, Hyg20 (ABC42557.1) and WP\_030831156.1 from *Streptomyces hygroscopicus*, UAM1 (Q8H8T0.1) and UAM3 (Q6Z4G3.1) from *Oryza sativa* Japonica Group, WP\_029381493.1 from *Streptomyces leeuwenhoekii*, WP\_055557796.1 from *Streptomyces* sp. NBRC 110028, WP\_018505382.1 from *Frankia* sp. BCU110501, WP\_004951028.1 from *Streptomyces mobaraensis*, WP\_007071477.1 from *Micromonospora* sp. ATCC 39149. The DxD.....R motif sequence was highlighted in red color.

MtdM -----MSTGI KRALVTGAGGF  
 Ata17 MRSRTHASEI RIRPSTHVRRVGERPASRRRESAHVGHVDRMESMPGKRRALVTGAGGF  
 OsGME-1 -----MGSEKNGTAYGEYTYAELEREQYWPSEKLRISITGAGGF  
 WP\_007071475.1 -----MT---RRALVTGAGGF  
 WP\_043963260.1 -----MT---RRALVTGAGGF  
 WP\_050361098.1 -----MS---QRALVTGAGGF  
 WP\_054492361.1 -----MQTRVLVTGAGGF  
 AMJ88\_07735 -----MSTQTRVLVTGAGGF  
 WP\_011521700.1 -----MLKRVLVTGAGGF  
 WP\_039721411.1 -----MKRALVAGAGGF  
 : : :\*\*\*\*\*

MtdM IGHHLVAHLRRNGYWVRGVDLHLPEFRPTE--ADEFLLLDLREKRNAERATSDI DEVYAL  
 Ata17 IGHHLVSYLRROGYWVRGADLRHPEFRPTE--ADEFVLADLREPVAEKVVEGVDEVSYL  
 OsGME-1 IGSIIARRLKSEGHYI IASDWKNEHMTEDMFCHEFHLDLVRVMDNCLKVTNGVDHVFNL  
 WP\_007071475.1 IGGHLVTYLRSQGWVRGADLRLPEFRATE--ADDFVVGDLRDPOVCRACEGVTEVYAL  
 WP\_043963260.1 IGGHLVTYLRQDQGWVRGADLRLPEFRATT--ADDFVVGDLRDPEVCRACDGVSEVYAL  
 WP\_050361098.1 IGSHLVSYLRHRGWVRGVDLKRPEFGPSD--ADEFVVGDLRDPVAATAACEGVDEVYAL  
 WP\_054492361.1 IGHHLVKYLKQKGYWVRGVDI KEPEFEPS--ADEFVLDLRRWDNCLLATRGVDHVVHL  
 AMJ88\_07735 IGSHLVKYLKQSEYWVRGADI KNPGFDETA--ADEFELLDLRRWENCLOATQDI DEVYAL  
 WP\_011521700.1 IGHHLMNALVDLGYWVRGADI KSPEFQPSR--ADEFHLLDLREVNCEQMTDGVDMVFAL  
 WP\_039721411.1 IGHHLVNFLKQKGYWVRGVDI KEPEFEKSR--SDEFYLLDLRYWGNCLEATKGI DEVYQL  
 \* . \* : \* : : . \* : : . : : \* : : \* : : \* : : \* : : \* : : \* : : \* : : \*

MtdM AADMGGMGFI SANHATI MYNNSLI DFNTLEAARRNGASRFFYASSACVYP SHLOSSADVT  
 Ata17 AADMGGMGFI SANHATI MKNNSLI DLNTLEAARKARVNRFFYASSACVYPAYRONI TEVV  
 OsGME-1 AADMGGMGFI QSNHSMI MYNNTMI SFNMLEAARI NGVKRFFYASSACI YPEFKOLET-NV  
 WP\_007071475.1 AADMGGMGFI SKDPATI LRNNALI NLHTI EAARLAGARRYFLASSACI YPEYAQTTPDLR  
 WP\_043963260.1 AADMGGMGFI SKDPATI LRNNALI NLHTVEAARLAGAQRYFLASSACI YPEYAQTTPDVR  
 WP\_050361098.1 AADMGGMGFI SRDPATI LHNNALI NINTI RAAQLAGVTRYFLASSACI YPEHI QTPDAS  
 WP\_054492361.1 AADMGGI GYI TAYHAVI ASNSAMI NVHMLEAARRNGAEKFFFSACI YPQYRQDPDLT  
 AMJ88\_07735 AADMGGMGYI SSHAQI MRNNLLDI HTLDASRI NGVSRLMYPSSACVYPEFLOEEADV  
 WP\_011521700.1 AADMGGMGYI SSHAQI LHTNTLI NFNTLEAARRSGVRRYLFSSACVYPEYRQLATDVP  
 WP\_039721411.1 AADMGGI GYI SGNHAEI AKNNI LI NTHMLEASYQNGVKRYFYSSACI YPSYRQOSADVI  
 \*\*\*\*\*: \* : \* : : \* : : : : \* : : : : \* : : : : \* : : \* : \*

MtdM GLREEVSHPADPEDG YGWEXL LHI EHACAYYREEFGLLETRVARLHNVYGPYSTYAGGREKA  
 Ata17 GLREEDAYPAAPEDG YGWEXL NTEHLCSYYREEYGLPVRVARLHNVYGPYCTYDGGREKS  
 OsGME-1 SLKESDAWPAEPQDAYGLEK LATEELCKHYTKDFGI ECRVGRFHNI YGPFGTWKGGREKA  
 WP\_007071475.1 PLREDDAFAPGPDQSYGWEXL MAERLCVYYAEQYGLAVRI ARYHNVYGPYGTWDGGREKA  
 WP\_043963260.1 PLREDDAFAPGPDQSYGWEXL MAERLCVYYAEQYGLDVRI ARYHNVYGPYGTWDGGREKA  
 WP\_050361098.1 ALRETDAPADPQDSYGWEXL MAELLCRYHEQYGMVVRVARYHNI YGPNGTYDGGREKA  
 WP\_054492361.1 PLREEDAYPADPEEG YGWEXL FMEKLCQYYEEDYGFKTYVARFHNI FGPLGTWEGGKEKA  
 AMJ88\_07735 PLKEEDAYPAMPQDAYGWQKLI SERTCMHFQEEFDI ETRVRFHNI FGPFGTWDGGREKA  
 WP\_011521700.1 ALREEDAYPAAPQDAYGWEXL I TERLCTHYREDYGMEMRI I RFHNI FGPLGTWEGGKEKA  
 WP\_039721411.1 PLKEEDAMPADPEEG YGWEXL FAEKLCQYYQEDKGMETRVARFHNVYGPLGTWKGGREKA  
 \* . \* : \* \* \* . . . \* \* : \* \* \* \* : : : : : : : \* \* \* : \* \* \* . \* : \* \* \* . \* .

MtdM PAALARKAALAAPGG--EME I WGDGROTRSF CYVDDCV EGI RRLTASDFPGPVNI GTEHL  
 Ata17 PAALARKAALAEPPG--RME I WGDGMQTRSY CYVDDCV EGI HRLTRSDFPGPVNLGTERL  
 OsGME-1 PAAFRCRKAQTSTDR----FEMWGDGLQTRSF TFI DECV EGVLR LTKSDFREP VNI GSDEIM  
 WP\_007071475.1 PAALCRKVAEAPPG--EVE I WGDGROTRSF CYVDDC L EGT YRLMRS DHGEP VNI GSDRL  
 WP\_043963260.1 PAALCRKVAEAPPG--EVE I WGDGROTRSF CYVDDC V EGT YRLMRS DHAEP VNI GSDRL  
 WP\_050361098.1 PAAMCRKVALASEDG--SI EVWGDGSOTR SF CYVDDC V EGT YLLMRS DHREPLNI GSDRL  
 WP\_054492361.1 PAALCRKI AI TKLTGNPEVE I WGDGEOTR SF CYVDD L VEG VYRLMQSDYHQPLNI GQDRM  
 AMJ88\_07735 PAALCRKVAVAKLTGNPEVE I WGDGEOTR SF CYI DDCLVGLHKL MRS DYHQPLNLGQDRM  
 WP\_011521700.1 PAAMCRKVAI AKLTGNHEI E I WGDGKOTR SF CYI DDCVTGI HKLMVSDFA YPLNLGQDRM  
 WP\_039721411.1 PAAI CRKI ALAEDSS--EI E I WGDGKOTR SF LYI QDCVEGI YLI TQSDY PKPLNLGSEEL  
 \* \* . \* \* : : \* : \* \* \* \* \* \* \* . : : : : : \* : \* \* . \* : \* \* \* . \* .

MtdM IAI DDLARMLLSI AGKEDVRLVH-RPGPQGVGRNSDN TLLREKLRWEPATPLWEGMSAM  
 Ata17 IAI NDLARMLLEI AGKPGVLEH-RPGPQGVGRNSDN ALLRAELGWEPSTPLETGMAAT  
 OsGME-1 VSMNEMAEI I LSFEDR-ELPIHH-I PGPEGVGRNSDN TLI KEKLGWAPTMLKLDGLRFT  
 WP\_007071475.1 VT I DELAALVMAAAGRDDLRLRH-VSGPQGVGRNSDN TRVROVLGWAPGI PLEQGLAVT  
 WP\_043963260.1 VT I DELAALVMTAAGRDDLRLRH-VAGPQGVGRNSDN TLVROVLGWAPRI PLEEG LAVT  
 WP\_050361098.1 VSVDEL AHLVFAAAGRDGLGI EH-I EGPQGVGRNSDN TLLRKVLGW EPTVPLEKGLLET  
 WP\_054492361.1 VT I NELADI I ANI AG-I EI VKKH-VPGPQGVGRNSDN TRLREV LGWEPQI SLEEGLART  
 AMJ88\_07735 VT I NQLVEMI AEI AG-I QI KRKH-I PGPEGVGRNSDN TRLKEVLNWEPTI SLEEGLART  
 WP\_011521700.1 VSI NELADLVADI AG-I RVNKRH-VSGPMGVGRNSDN TLLRQVLGWTPVI SLEDGLRRT  
 WP\_039721411.1 VT I DQLVEMTAKVANKN-I RI RHNLSPQGVGRNSDN SKLYKI TGWM PKFSLLEGLKLT  
 : : : : : : : : \* \* \* \* \* \* \* \* : \* \* \* \* \* :

```

MtdM          YHWI ERDI ARRGRDVAVSSI VPRAEEPHVRP-----
Ata17         YHWI RSDI ERRAGTVQAASE I VRVGDPGA-----
OsGME-1       YFWI KEQI EKEKTQGVDI AGYGSSKVVSTQAPVQLGSLRAADGKE
WP_007071475.1 YRWI AEQVAARRDATAQAAPA-----
WP_043963260.1 YRWI AGEVAAARGAAAHATPA-----
WP_050361098.1 YQWI SRELAARSVA-----
WP_054492361.1 YAWI EEQVRQKLAREMDI SSASV-----
AMJ88_07735   YAWI EKQVQAKLDREHE-----
WP_011521700.1 YRWI EAQVAAKLSEKCSSSFTSKVAATTP-----
WP_039721411.1 YPWI AERVAQERNMOGCQ-----
* * * * *

```

**Fig. S25.** Multiple sequence alignments of MtdM with its homologues (Ata17, OsGME-1, WP\_007071475.1, WP\_043963260.1, WP\_050361098.1, WP\_054492361.1, AMJ88\_07735, WP\_011521700.1, WP\_039721411.1). The following proteins (with GenBank IDs) were used for amino acid alignment: Ata17 (CAD62190.1) from *Saccharothrix mutabilis* subsp. capreolus, OsGME-1 (BAD66930.1) from *Oryza sativa* Japonica Group, WP\_007071475.1 from *Micromonospora* sp. ATCC 39149, WP\_043963260.1 from *Micromonospora carbonacea*, WP\_050361098.1 from *Streptomyces*, WP\_054492361.1 from *Ardenticatena maritime*, AMJ88\_07735 from *Anaerolineae bacterium* SM23\_63, WP\_011521700.1 from *Candidatus Koribacter versatilis*, WP\_039721411.1 from *Methylocidiphilum kamchatkense*. The GxxGxxG.....S.....YxxxK motif sequence was highlighted in red color.

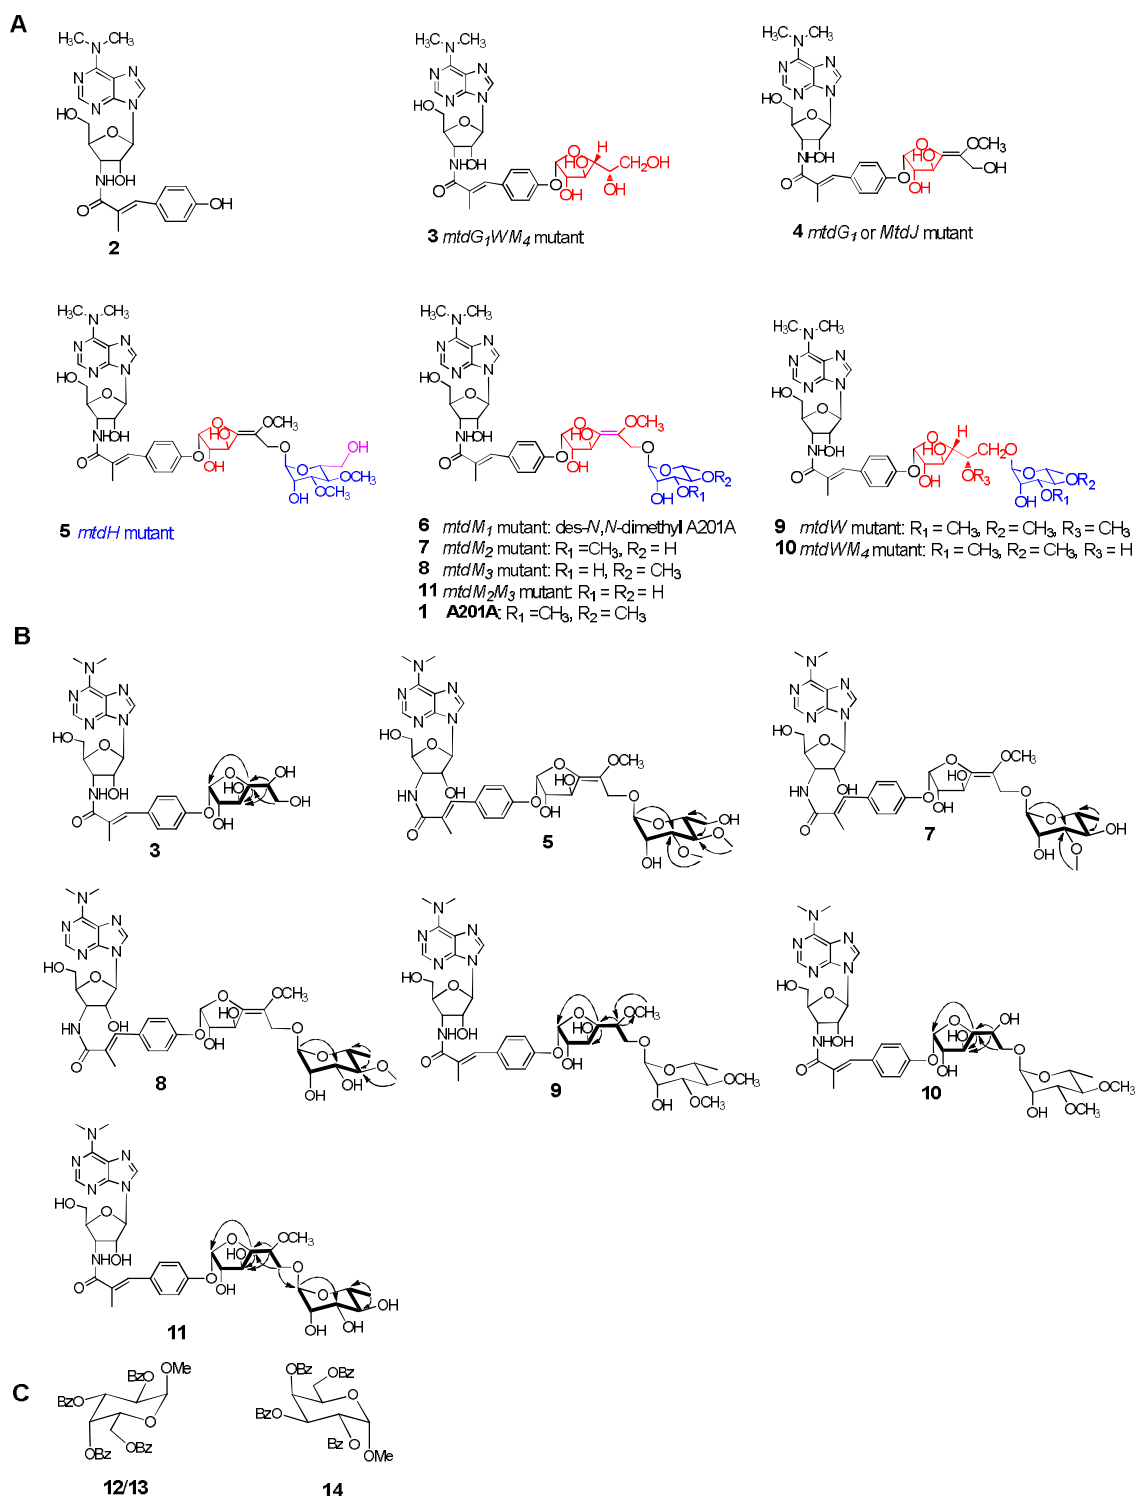

**Fig. S26.** (A) Compounds 1–11 as identified during metabolite analyses carried out during this study; (B) Key COSY and HMBC correlations of 3, 5, and 7–11; (C) Chemical structures of compounds 12–14.

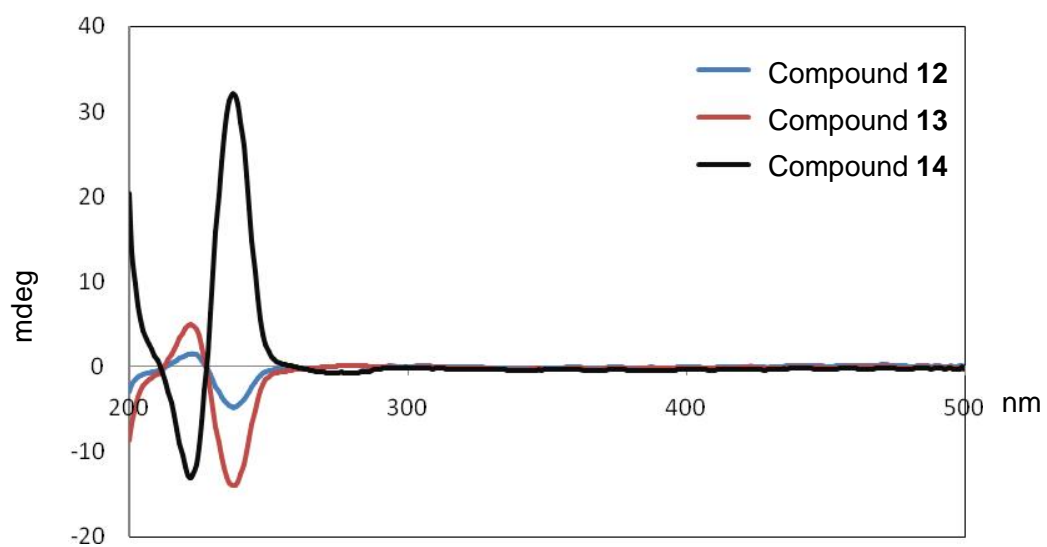

**Fig. S27.** The CD spectra of compounds **12**, **13**, and **14** showed that **12** and **13** possessed the same L-configuration. CD spectra were obtained at 25 °C using a 1 mm quartz cuvette in MeCN. The concentrations of **12**, **13**, and **14** were 0.000013 and 0.000049, and 0.000115 M, respectively.

A. HR-ESI-MS spectrum for compound **12**.

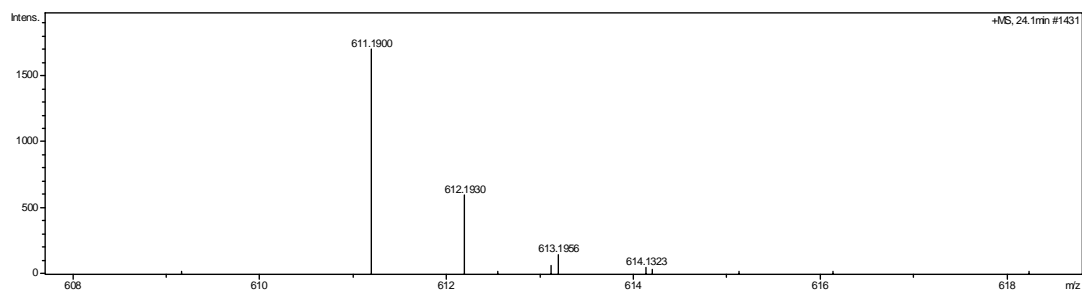

B. HR-ESI-MS spectrum for compound **13**.

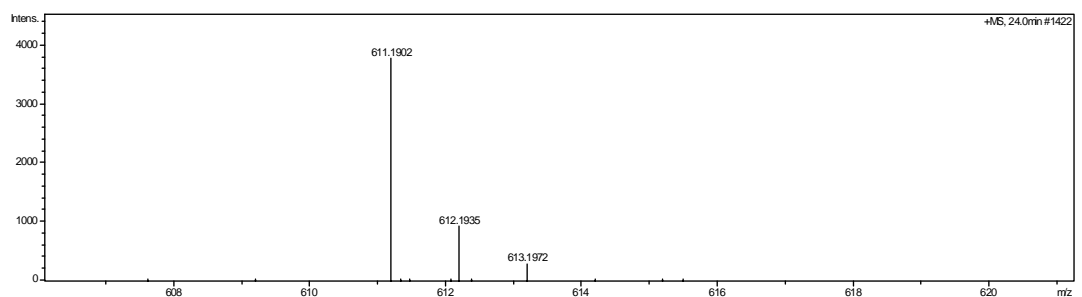

C. HR-ESI-MS spectrum for compound **14**.

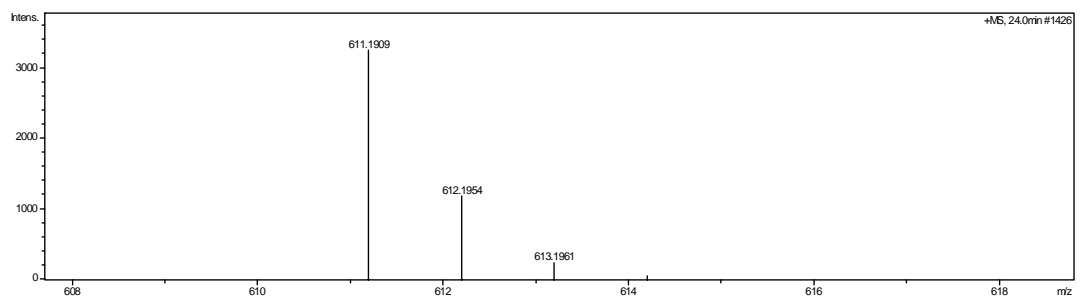

**Fig. S28.** The HR-ESI-MS spectra for compounds **12–14**.

**GxGxxG.....**

```

MtdW          MAGRDLI LPI RESASDRKPPSGTKEERAMSLPSAADTVVVVGAGSAGCVVANRLSADPARG
Ata10_protein -----MNATFDTI VVGAGSAGCVVANRLSADPSRR
betaA_1       -----MI GEDYDYI I I GAGSAGAVLAARLSEDPVK
M271_40235   -----MTPTVEADWVVVGAGSAGSVLAARLSEDPASE
WP_050800219.1 -----MTPTVEADWVVVGAGSAGSVLAARLSEDPASE
SSOG_09008   -----MDGGGTMTPTVEADWVVVGAGSAGSVLAARLSEDPASE
WP_007670468.1 -----MQSDYDYI I V GAGSAGAVLATRLSEDPATR
WP_051573876.1 -----MEADWVVVGAGSAGSVLAARLSEDPASE
WP_057613603.1 -----MGNVI EADWVVVGAGSAGCVLAARLSEAPAE
WP_020695985.1 -----MDGEYDYI I I GAGSAGAVLAARLTEDPAI R
WP_028076038.1 -----MRATRI EAD I LVVGAGSAGCVLAARLSEDPSTQ
WP_015684527.1 -----MI EQEYDTI I I GAGSAGATLAARLSEDPAHR
* : : : * * * : : . * * * :

```

**.....E**

```

MtdW          VLLLLAG---DDTPLPALRSLDFRAAVRD---VSRHWPGLRARRGSAQRPRLLLQGRGV
Ata10_protein VLVVLAG---PAGPVPAALRSLDFRAAVRE---PAWHMPDLTARRTRDQPRRFLLQGRGL
betaA_1       VLLLLAGRDFRSAETPDHI R I PNPMRAI GD---DDYRWPKLMARRTERRQEPRLLWRGRAV
M271_40235   VVLLLAGRDWRPADAPPQLRSMNGWRALDEKACAEFWPGLTSRRSRAQAPRPHVRGRGL
WP_050800219.1 VVLLLAGRDWRSADAPPQLRSMNGWRALDETACPEFWPGLTSRRSRAQAPRPHVRGRGL
SSOG_09008   VVLLLAGRDWRSADAPPQLRSMNGWRALDETACPEFWPGLTSRRSRAQAPRPHVRGRGL
WP_007670468.1 VVLLLAGRDFRTADTPEHI R I PNPLRAI GD---DGYRWPKLLARRTERRQEPKLLWRGRAI
WP_051573876.1 VVLLLAGRDWRSADAPPQLRSMNGWRALDETACAEFWQGLTSRRSRAQAPRPHVRGRGL
WP_057613603.1 VVLLLAGPDWRSADAPEMRSMNGWRALDETACAPFWPGLSRRSTAQERRPHVRGRGL
WP_020695985.1 VVLLLAGDFRTAETPAHLR I PNPLRAI GD---DNYRWPKLLARRTERRQEPKLLWRGRAI
WP_028076038.1 VVLLLAGPDWRSADAPEVRSMNGWRALDEGACGQFWTGIESRSSAQEPRPHVRGKL
WP_015684527.1 VVLLLAGQDLRTATTPEH I R I PNPMRAI GD---DDFRWPKLLARRTERRQPLLLWRGRAM
* : : : * * * : * * : * : * : * : * : * : * : * : * : * : * : * : * :

```

```

MtdW          GGTSAINGLIAMWPMPEDFDEWAALGCDGWTHRDVSPSLSRISRDLDS-----KAGAGAGM
Ata10_protein GGTSAVNGLIAMRPMVEDLDEWAAAGCPGWGYKNLLPAFTRLETDLFGRDAHHGDDGPV
betaA_1       GGSSTINGQIAIRGVPDDFDRWQADCAGWQDVLLFFNRLETDVNFGTAPYHGSTGPI
M271_40235   GGSSSVNGMIAFRAMPDDYDRWAAYGCPGWSYADMPYLRRMESDADFGDRPHHGDHGPI
WP_050800219.1 GGSSSVNGMIAFRAMPDDYDRWAAYGCPGWSYADMVPYLRRMESDADFGDRPHHGDHGPI
SSOG_09008   GGSSSVNGMIAFRAMPDDYDRWAAYGCPGWSYADMVPYLRRMESDADFGDRPHHGDHGPI
WP_007670468.1 GGSSTINGQIAIRGIPDDFQRWAGLGCDGWDEVLPYFRKLEDDVDFGDAPYHGRGGPI
WP_051573876.1 GGSSSVNGMIALRAMPDDYDRWAGYGCPGWSYADMLPYLRRMESDADFGDRPHHGDHGPI
WP_057613603.1 GGSSSVNGMIAIRALPDDYDRWASYGCPGWSYEMLPYLRRMESDADFGDRPHHGADGPI
WP_020695985.1 GGSSTINGQIAIRGIPEDFADWEAEGARGWGWNEVLPYFCKLEGDVNFGDKPYHGKDGPI
WP_028076038.1 GGSSVVNGMIAIHAMPDDYDRWVADGCAGWSFDDVLPVRRRLESDMNFGDAPYHGAEGPM
WP_015684527.1 GGSSTINGQIAIRAVPDDIDRWAAAGCTGWSWEMLPYFCKLETDKNFDAPYHGDRGPI
* * : * : * * * : : * * : * : * : * : * : * : * : * : * : * : * : * : * :

```



MtdW PVRRPPRPTWGSLDLALAEWAGDRGFPAAEHDHNPAGSTGLSPYAFSARDGGRVSAADAF  
 Ata10\_protein PVRRTRPAAWGALDLALASWAGDRGLPRVEDHNPDTTGLAPYAFNAWSDTRVSAADAF  
 beta\_1 PVYRAPVADWGSVDVALKDASI GLGYGWCEDHNAPEGTGASPYAI NSRAGARVSTNDGYL  
 M271\_40235 PVQRLGREDWGPADHALAEALGRGHAWCDDHNGPAGTGVSPYAI SSRDGARVTTNDGYL  
 WP\_050800219.1 PVQRLGREDWGPADHALAEALGRGHAWCDDHNGPTGTGVSPYAI SSRDGARVTTNDGYL  
 SSOG\_09008 PVQRLGREDWGPADHALAEALGRGHAWCDDHNGPTGTGVSPYAI SSRDGARVTTNDGYL  
 WP\_007670468.1 PVYRAPVEDWGYVDRALKASAESLGYPWCEDHNPADSTGASPYAI NSRDGYRI STNDGYL  
 WP\_051573876.1 PVQRLGREDWGPADHALAEALGHGHAWCDDHNGPTGTGVSPYAI SSRDGARVTTNDGYL  
 WP\_057613603.1 PVQRLGREAWGPADHALAEALGI GHPWCDDHNGPTGTGVSPYGI NSRDGARVTANDGYL  
 WP\_020695985.1 PVYRAPI DDWGPADRALMKAAVGLGYGWCEDHNAPEGTGASPYAI NSRAGLRI STNDGYL  
 WP\_028076038.1 PI TRLDRAAWGPVDEALAAGAAGHGWCEDHNPATGTGI SPYGI SSRDGARVTANDGYL  
 WP\_015684527.1 PVYRAPI PDWGNVDRALRSSALSLGYGWCEDHNPADGTGVSPYAI NSEGLRI STNDGYL  
 \* : \* \*\* \* \*\* : \* \* \* \* \*\* : \* : \* : \*

MtdW API LDRPNLTVLARTVAERLI VRGGR--VTGVCCRTPDGEVVI EA-GEVVVTAGAVGSPA  
 Ata10\_protein APVLDLDRPNLTVLTGTVCRRLLVRGGR--VTGVECDGPTG--VVTA-AEVVVAAGVLGSPA  
 beta\_1 EPARGRANLTI VGHALVDRLOVEGNRPHASGVHVTVDGRTYAPRANRSVI LSAGAI HSPA  
 M271\_40235 EPARORPNL RVFGGATVDTVLVQGG--AVGVRVRRGNDWTEVRA-QHVVL CAGAVHSPA  
 WP\_050800219.1 EPARORPNL RVFGGATVDTVLI EGGR--AVGVRLRRGNDWTEVRA-QHVVL CAGAVHSPA  
 SSOG\_09008 EPARORPNL RVFGGATVDTVLI EGGR--AVGVRLRRGNDWTEVRA-QHVVL CAGAVHSPA  
 WP\_007670468.1 ESARDRGNTI VGNALVDTLTI EGNRPHI SGVSWI DGERRSVRATREVI LSAGAI HSPA  
 WP\_051573876.1 EPARORPNL RVFGCATVDTVLEGG--AVGVRLRRGNDWTEVRA-QHVVL CAGAVHSPA  
 WP\_057613603.1 EPARORPNLRI VGDATVDQVI VEGGR--AVGVRVVDGTWTQVRA-ARVVL CAGAVNSPS  
 WP\_020695985.1 EPARHRSNLT I VGOALVDTLQFEGNRPHVSGVAVRVGGETRTVRARREVI LSAGAI HSPA  
 WP\_028076038.1 EPARDRSNLRVI GGATVDQVLEGG--AAGVRARI AGEWVEARA-ENVI LCAGAI GSPA  
 WP\_015684527.1 EPARGRANLDI VGHALVDTI TFEGRNLHASGVLRVNGQSYTPRATREVMLCAGAI HSPA  
 . : \* : : : . \* \*\* \* : : \*\* \* :

MtdW LLLRSGI GPAHRLERVGVPVADLPGVQGLQDHPALTLPI RLAAPGAA--PPRPTNCC  
 Ata10\_protein LLLRSGLGPADHL TSVGVPVRADLPGVGRNLQDHAALTLPVRLTG DAPA--PSRPTNCC  
 beta\_1 VLQRSGI GPAGVLKGLGI PVVADLP-VGENLLDHPMMPLFLTLKD HARVGTLMHRHTNCC  
 M271\_40235 I LLLRSGI GPDGPVAAL-----P-VGEGMQEHPLALFWLYARPGNHP-DVDARQTNCC  
 WP\_050800219.1 I LLLRSGI GPDGPVAAL-----P-VGEGMQEHPLALFWLYARPGKQP-DI DARHANCC  
 SSOG\_09008 I LLLRSGI GPDGPVAAL-----P-VGEGMQEHPLALFWLYARPGKQP-DI DARHANCC  
 WP\_007670468.1 I LQRSGI GPAALLQDLGVPVAVDRP-VGANLLDHPILGI LLHLRSEAQVGRMHRHTNCC  
 WP\_051573876.1 I LLLRSGI GPDGPVAAL-----P-VGEGMQEHPLALFWLYARPGKHP-DVDARQTNCC  
 WP\_057613603.1 I LLLRSGI GPGGRVASL-----P-VGEGMQEHPLALFWLHORPEARP-GLDERQTNCC  
 WP\_020695985.1 I LQRSGI GPRTVLDRLGI ETVADRP-VGEHLLDHPILSLMLHLREDARVSTLMHRHTNCC  
 WP\_028076038.1 I LLLRSGI GPEGSAARL-----P-VGEGMQEHPLALFWLFHRPEARP-SVDDRQANCC  
 WP\_015684527.1 I LQRSGI GPAALLERLGI PI RADLP-VGENLLDHPI VNALHLRDLGSOVNTLMHRHTNCC  
 \* \*\* \* : : \* \* : \* : \* : \* \* :

MtdW LRFASGESDGEANELMLNALN-----EVGPGVGA----VVL  
 Ata10\_protein VRLDAGLPGSRPNELMVNALN-----EVEPGLGA----VVL  
 betaA\_1 LRYSSGLGGAGENDMI VIAGNLVS-L-----GANGDTGRGR---LVV  
 M271\_40235 LRYSSGLEGAGENDMMI ASI NQTLALPDPGSHLVAQGTGGTWGGAGGGHTAGGPGLLCL  
 WP\_050800219.1 LRYSSGLAGAGENDMMI TSI NQTLALPNPGDHLVAEGTGGTWGGAGGGHAAGGPGLLCL  
 SSOG\_09008 LRYSSGLAGAGENDMMI TSI NQTLALPNPGDHLVAEGTGGTWGGAGGGHAAGGPGLLCL  
 WP\_007670468.1 LRYSSGLPGAGENDMI MIAGNLR--S-----EAEGDLARGR---I AV  
 WP\_051573876.1 LRYSSGLEGAGENDMMI ASI NQTLALPDPGSHLVAEGTGGTWGGAGGGHTAGGPGLLCL  
 WP\_057613603.1 VRYSSDLADANENDMMI VSI NQTLALPDMNSHLVADGARGTWGGAGGGHASGGPGLLCL  
 WP\_020695985.1 VRYSSGLAGAGVNDMI MIAGNLR--A-----EADGGTALAR---LAV  
 WP\_028076038.1 VRYSSGLEGAGENDMMI VAVNQTLALPPDVTSHLVADQLAGTWGGAGGGQTAGGPGLLCL  
 WP\_015684527.1 LRYSSGLAGAGDNDMI MIAGNLARSO-----QSI AEVTLGR---I AV  
 : \* : . : . \* : : : : \* : : :

MtdW ALFRPEARGRVEVTGAGLDDDLVVDLGLLGTTERDLRMRAGVARLADLARHPAFERVGSP  
 Ata10\_protein ALFRPESTGRVELAGP--DRGLLVLDLFLSTDADLARMRAGAALLAEI AGHPALTAVGQP  
 betaA\_1 SVYQAFSQGHVRI TTPDPSVDPAVEERMLSDERDLVRMRDGLRLRLALARHEAI RAI TTR  
 M271\_40235 WANQOFSRGVRLASADPDVHPVMDODLLSDRADLVRMRDGVKHCVELLRSGPFDTAFEH  
 WP\_050800219.1 WANQOFSRGVRLASADPDVHPVMDODLLSDPSDLVRMRDGVKHCVELLRSGPFDTAFEH  
 SSOG\_09008 WANQOFSRGVRLASADPDVHPVMDODLLSDPSDLVRMRDGVKHCVELLRSGPFDTAFEH  
 WP\_007670468.1 SVYQAFSQGTVRI ASSDPHLDPVVEERMLSDERDLLRMRDGVRRLCVAVGRQDGVHSI ATR  
 WP\_051573876.1 WANQOFSRGVRLASADPDVHPVMDODLLSHPADLVRMRDGVKHCVELLRSGPFDTAFEH  
 WP\_057613603.1 WANQOFSRGVRLASADPDVHPVMDODLLSHPADLVRMRDGVKHCVELLRSGPFDTAFEH  
 WP\_020695985.1 SAFQAFSEGTVRI ASRDPAI DPOVDERMLSSES DYLRMRDGMRLQEI ARHPDVQAI ATR  
 WP\_028076038.1 WLNQOFSRGVRLASADPDVHPVMDODLLSHPADLVRMRDGVKHCVELLRSGPFDTAFEH  
 WP\_015684527.1 SVYQAFSQGHVCI VTTDPTI DPI VEERMLSDSRDLVRLRDGVRRRLRDI CLQPAVTDI AHR  
 : . \* : : : : \* : \* \* \* : : .

MtdW VGADLLR--GLARRPEELDSWMAARCHEAWHLVGS CRMGDPADPATVVDPRGRVKGVAG  
 Ata10\_protein I GAAALR--ARLGDPAALDAWL RARCHEAWHLVGT CRMGSPADPGA VVGPD CRVHGVAG  
 betaA\_1 VDYGSTGRS I EEDLSPAELDDWLFSECSDAO HASGT CRMGAADDPRS VVDPCRV I GCTG  
 M271\_40235 I A I D I AGRGLDALSDDATVDRWLMETI GDTGHI CGT CRMGAPDDPRT VVDPSGRV LGVDG  
 WP\_050800219.1 I A I D I AGRGLDTLSDDATVDRWLMETI GDTGHI CGT CRMGAPDDPRA VVDPSGRV LGVDG  
 SSOG\_09008 I A I D I AGRGLDTLSDDATVDRWLMETI GDTGHI CGT CRMGAPDDPRA VVDPSGRV LGVDG  
 WP\_007670468.1 VEYGI SGRS I EDEL TGI DLDDWMAECSDAO HASGT CRMGPVSDPRS VVDPA CRVI GCTG  
 WP\_051573876.1 I A I D I AGRGLDTLSDDATVDRWLMETI GDTGHI CGT CRMGAPDDPRA VVDPSGRV LGVDG  
 WP\_057613603.1 I AVDLAGTGDAL TDDTAI DRW LLET I GDTGHI CGT CRMGAPDDPRA VVDPA GRV LGVEG  
 WP\_020695985.1 ADYGM SGRS I DEPFAPKELEDW MFAECSDAO HASGT CRMGAADDPRS VVDPE CRVI GCTG  
 WP\_028076038.1 VA I DLTGRGI DELSDDRAI DAWLLATI GDTGHI CGT CRMGSPEDPRT VVDPEGRV LGVDG  
 WP\_015684527.1 VDYGASGRSMDEALGDAELDDWLF AECSDAO HASGT CRMGAPDDARS VVDHE CRVI GCTG  
 : : : : \* : : \* \* \* \* : : \* \* \* \*

```

MtdW          LRVADASVI PRVPRSNTNLVTMAVADHMHPSRPGRE-----
Ata10_protein LRVVDASVVPRTPRSNTHLVAMAVEHALEDVL-----
betA_1        LHVI DASIMPEVVRANTHLTTVMI AEKMAERLRAG-----
M271_40235    LWVADASVFPEVPRANTNLPTIAAAERLSDLI RGRLAG-PI AGESAVTPA--
WP_050800219.1 LWVADASVFPEVPRANTNLPTIAAAERLSDLI RGRRAG-PTADESAVTPA--
SSOG_09008    LWVADASVFPEVPRANTNLPTIAAAERLSDLI RGRRAG-PTADESAVTPA--
WP_007670468.1 LRVI DASVMPEVVRANTHLTTVMI AEKMADTLKRRE-----
WP_051573876.1 LWVADASVFPEVPRANTNLPTIAAAERLSDLI RGRLAG-PI AGESAVTPA--
WP_057613603.1 LWVADASVFPEVPRANTNLPTIAAAERLADLMTGRTNP-ATGVESLAVQGGG
WP_020695985.1 LRVI DASVMPTVVRANTHFTTVMI AERMADRLRLRAAG-----
WP_028076038.1 LWVADASVFPYVPRANTNLPTIEVAERLSDLI GARVSSRPLAAEASATS---
WP_015684527.1 LRVI DASIMPEVVRANTHLTTVAI AERMADRLKSTR-----
* * ***..* . *.**.. : : :

```

**Fig. S29.** Multiple sequence alignments for MtdW with its homologues (Ata10\_protein, betA\_1, M271\_40235, WP\_050800219.1, SSOG\_09008, WP\_007670468.1, WP\_051573876.1, WP\_057613603.1, WP\_020695985.1, WP\_028076038.1, WP\_015684527.1). The following proteins (with GenBank IDs) were used for amino acid alignment: Ata10\_protein (CAD62204.1) from *Saccharothrix mutabilis* subsp. *capreolus*, betA\_1 (CEJ10070.1) from *bacterium* YEK0313, M271\_40235 (AGP59428.1) from *Streptomyces rapamycinicus* NRRL 5491, WP\_050800219.1 from *Streptomyces himastatinicus*, SSOG\_09008 (EFL29294.1) from *Streptomyces himastatinicus* ATCC 53653, WP\_007670468.1 from *alpha proteobacterium* BAL199, WP\_051573876.1 from *Streptomyces* sp. PRh5, WP\_057613603.1 from *Streptomyces* sp. Root369, WP\_020695985.1 from *Reyranelia massiliensis*, WP\_028076038.1 from *Solirubrobacterales bacterium* URHD0059, WP\_015684527.1 from *Bradyrhizobium* sp. S23321. The binding motif GxGxxG(x)<sub>18</sub>E in the N terminus for ribose moiety of FAD was highlighted in red color. The conserved H(x)<sub>37</sub>P motif in the C terminus presumably involved in substrate oxidation was highlighted in yellow color.

**Fig. S30.**  $^1\text{H}$  NMR (500 MHz) spectrum of compound **1** in  $\text{CD}_3\text{OD}$

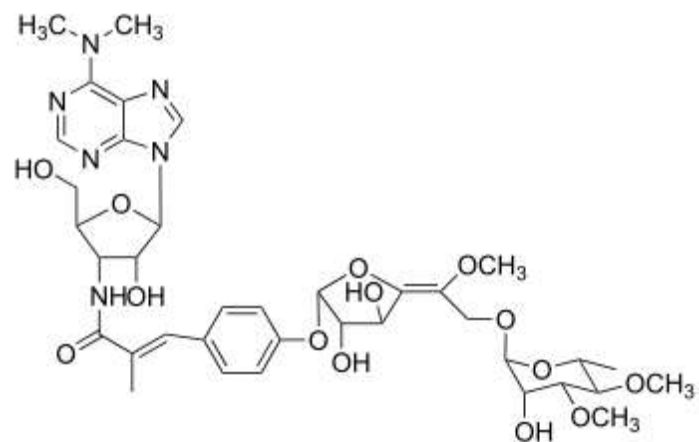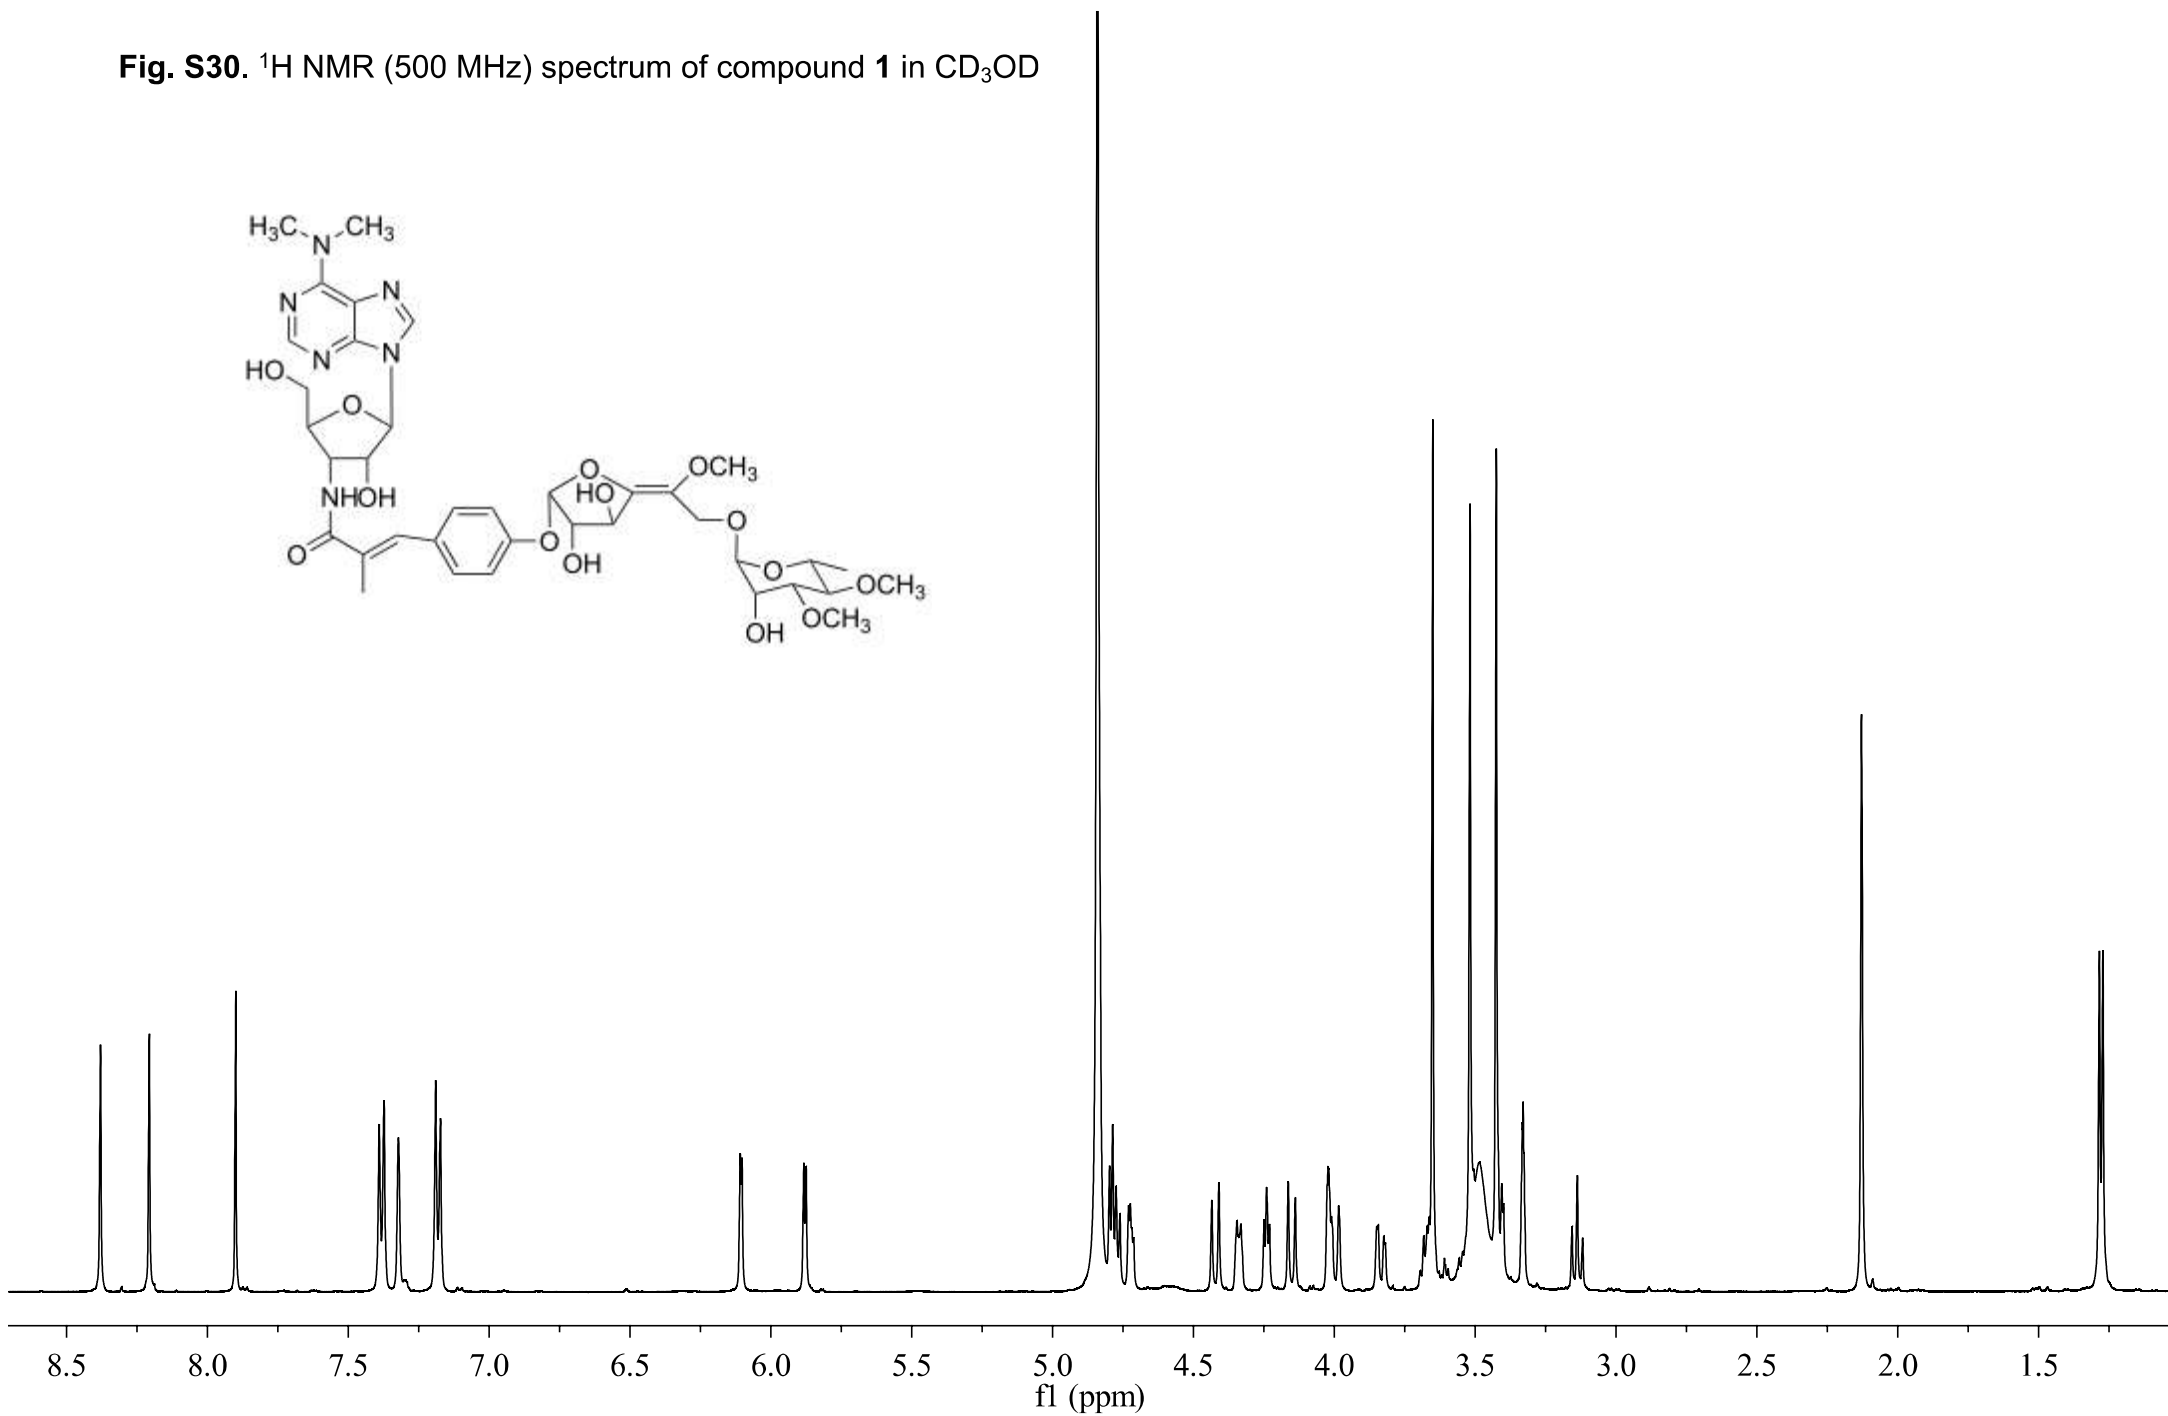

**Fig. S31.**  $^{13}\text{C}$  NMR (125 MHz) spectrum of compound **1** in  $\text{CD}_3\text{OD}$

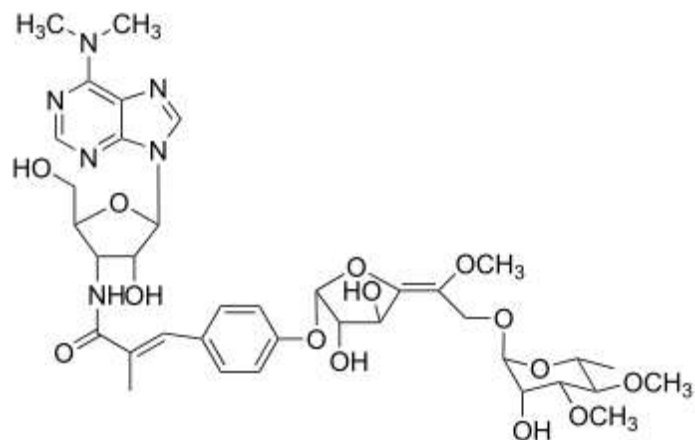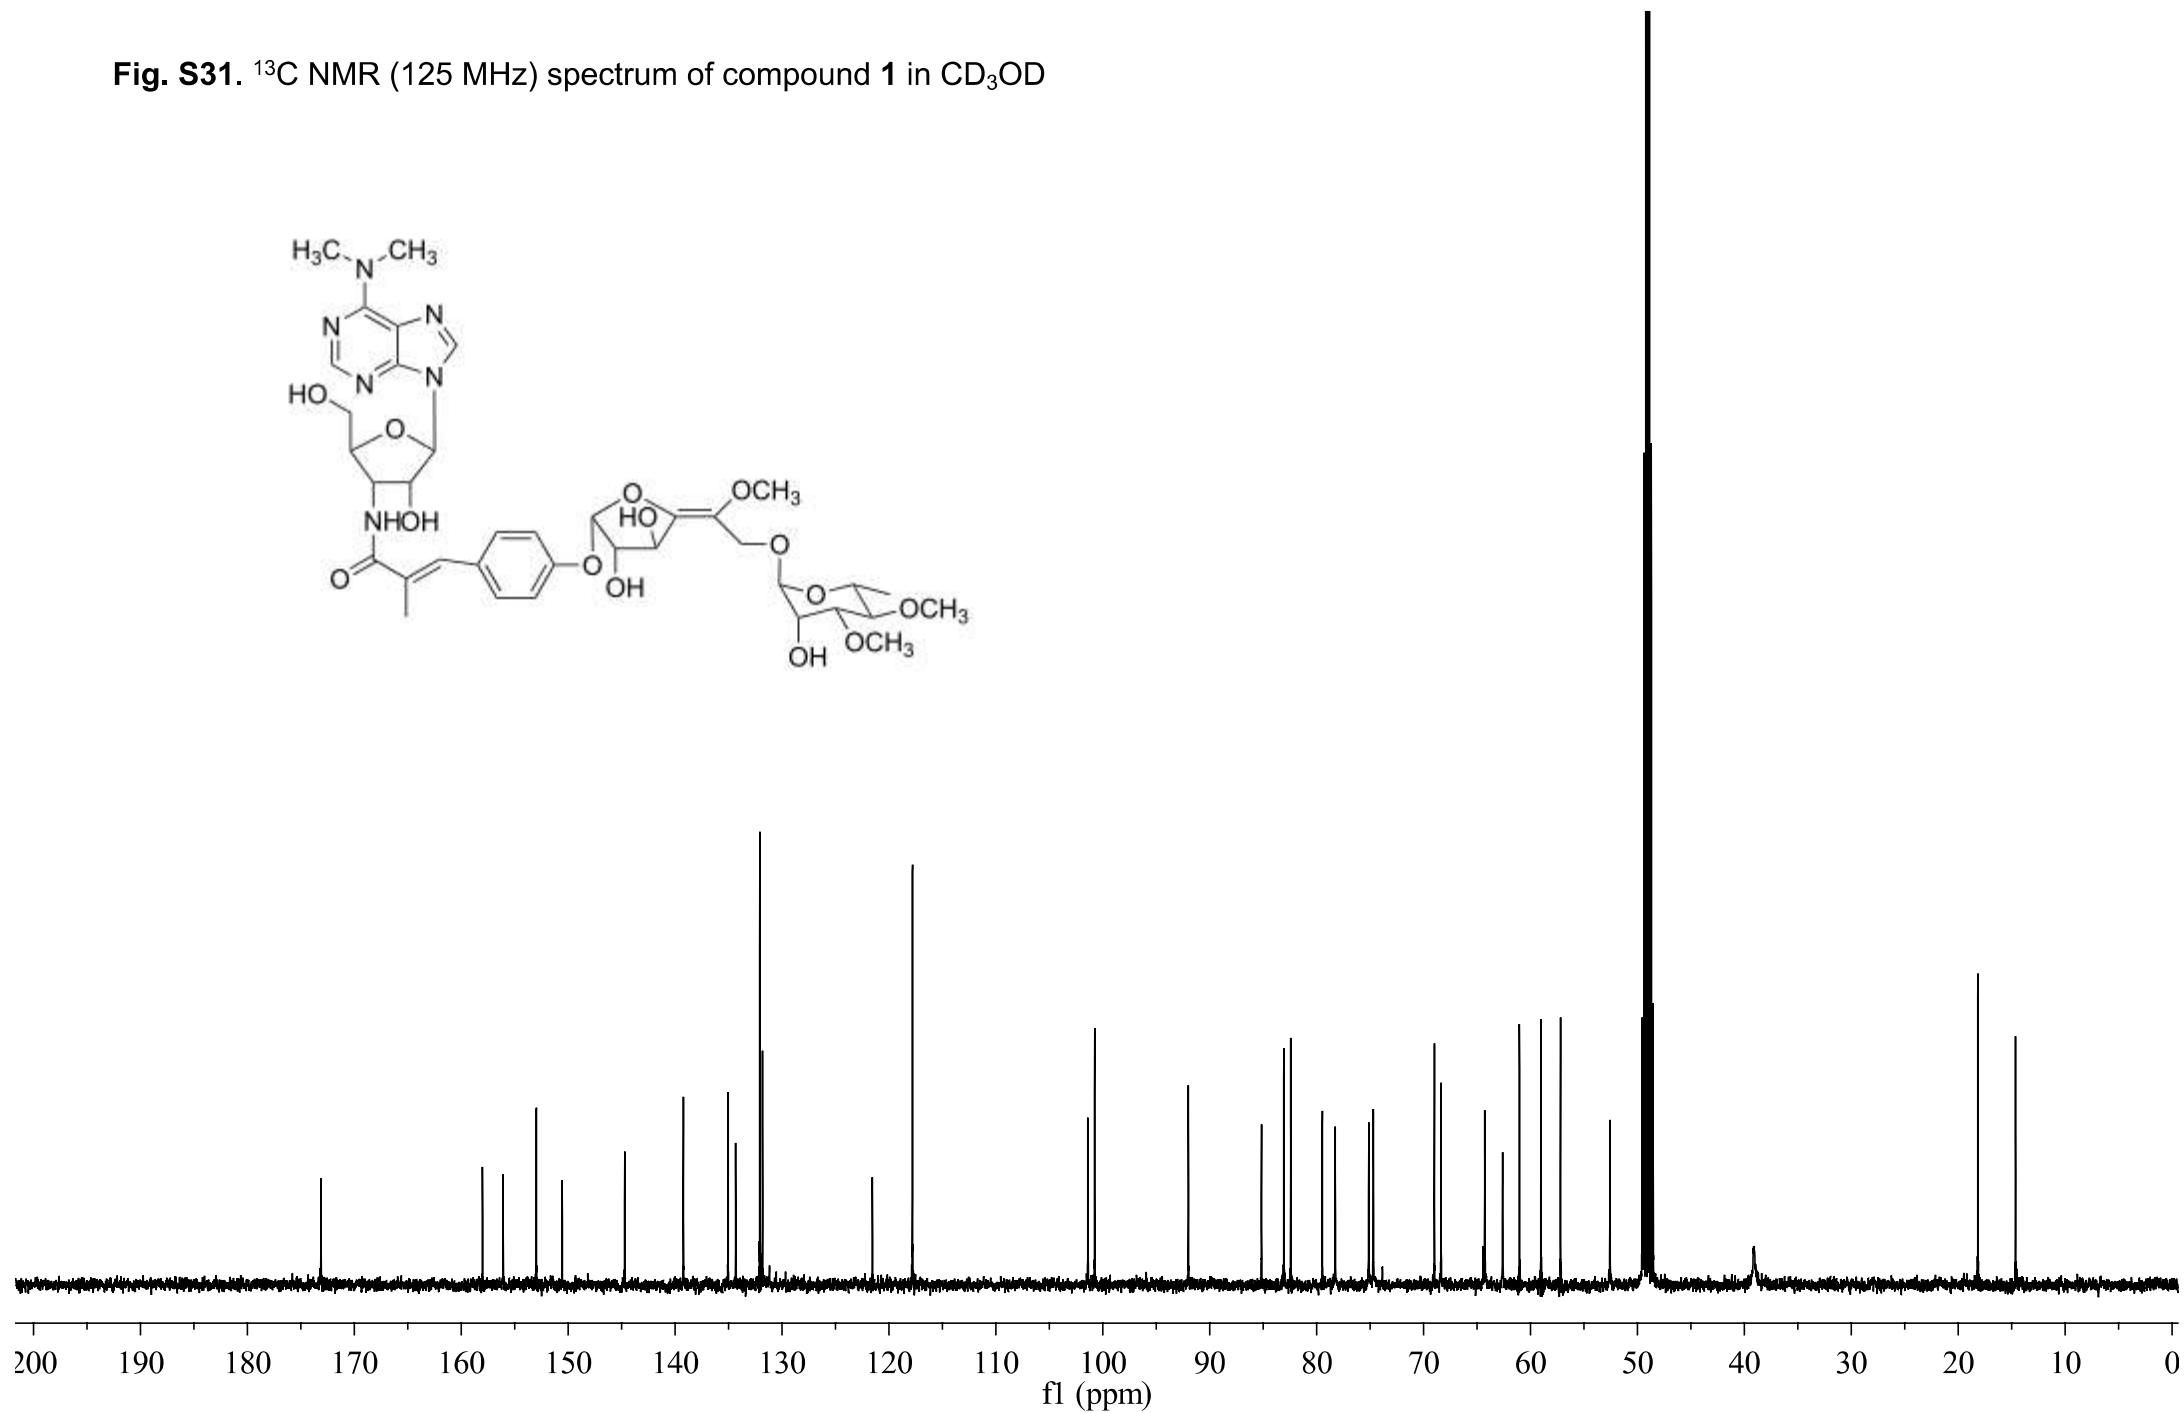

Fig. S32. DEPT 135 NMR (125 MHz) spectrum of compound **1** in CD<sub>3</sub>OD

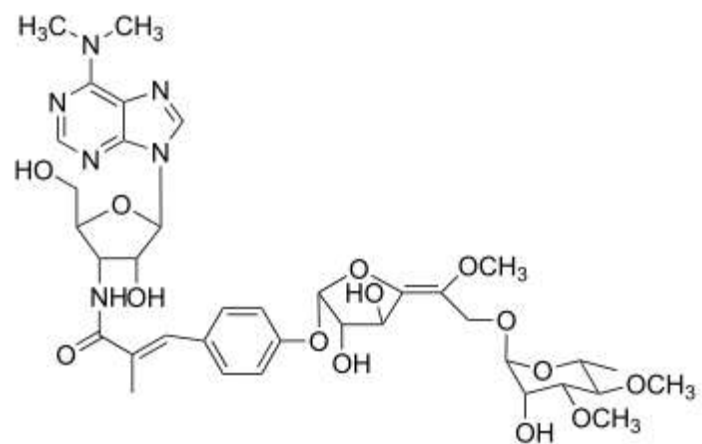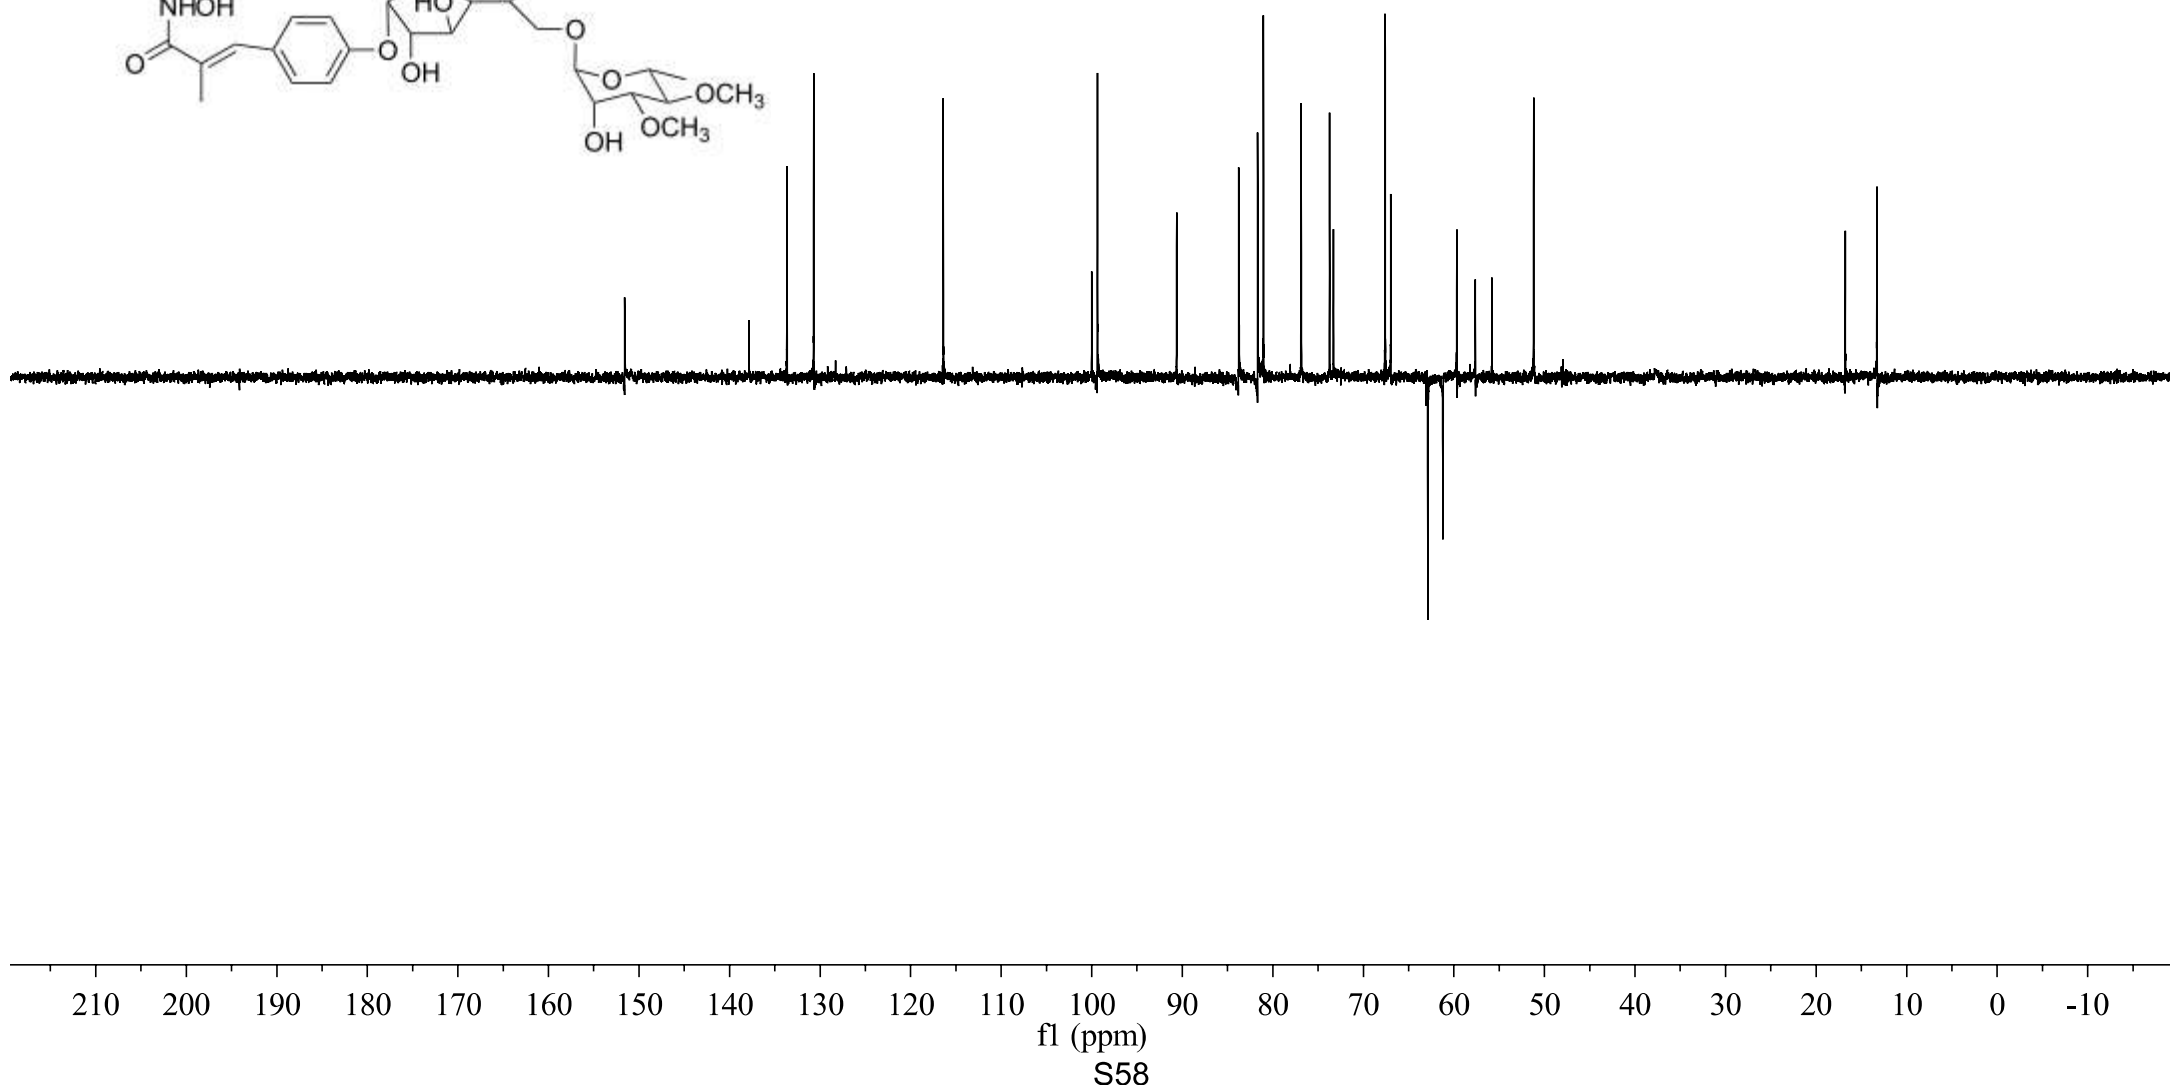

Fig. S33. HSQC spectrum of compound 1 in CD<sub>3</sub>OD

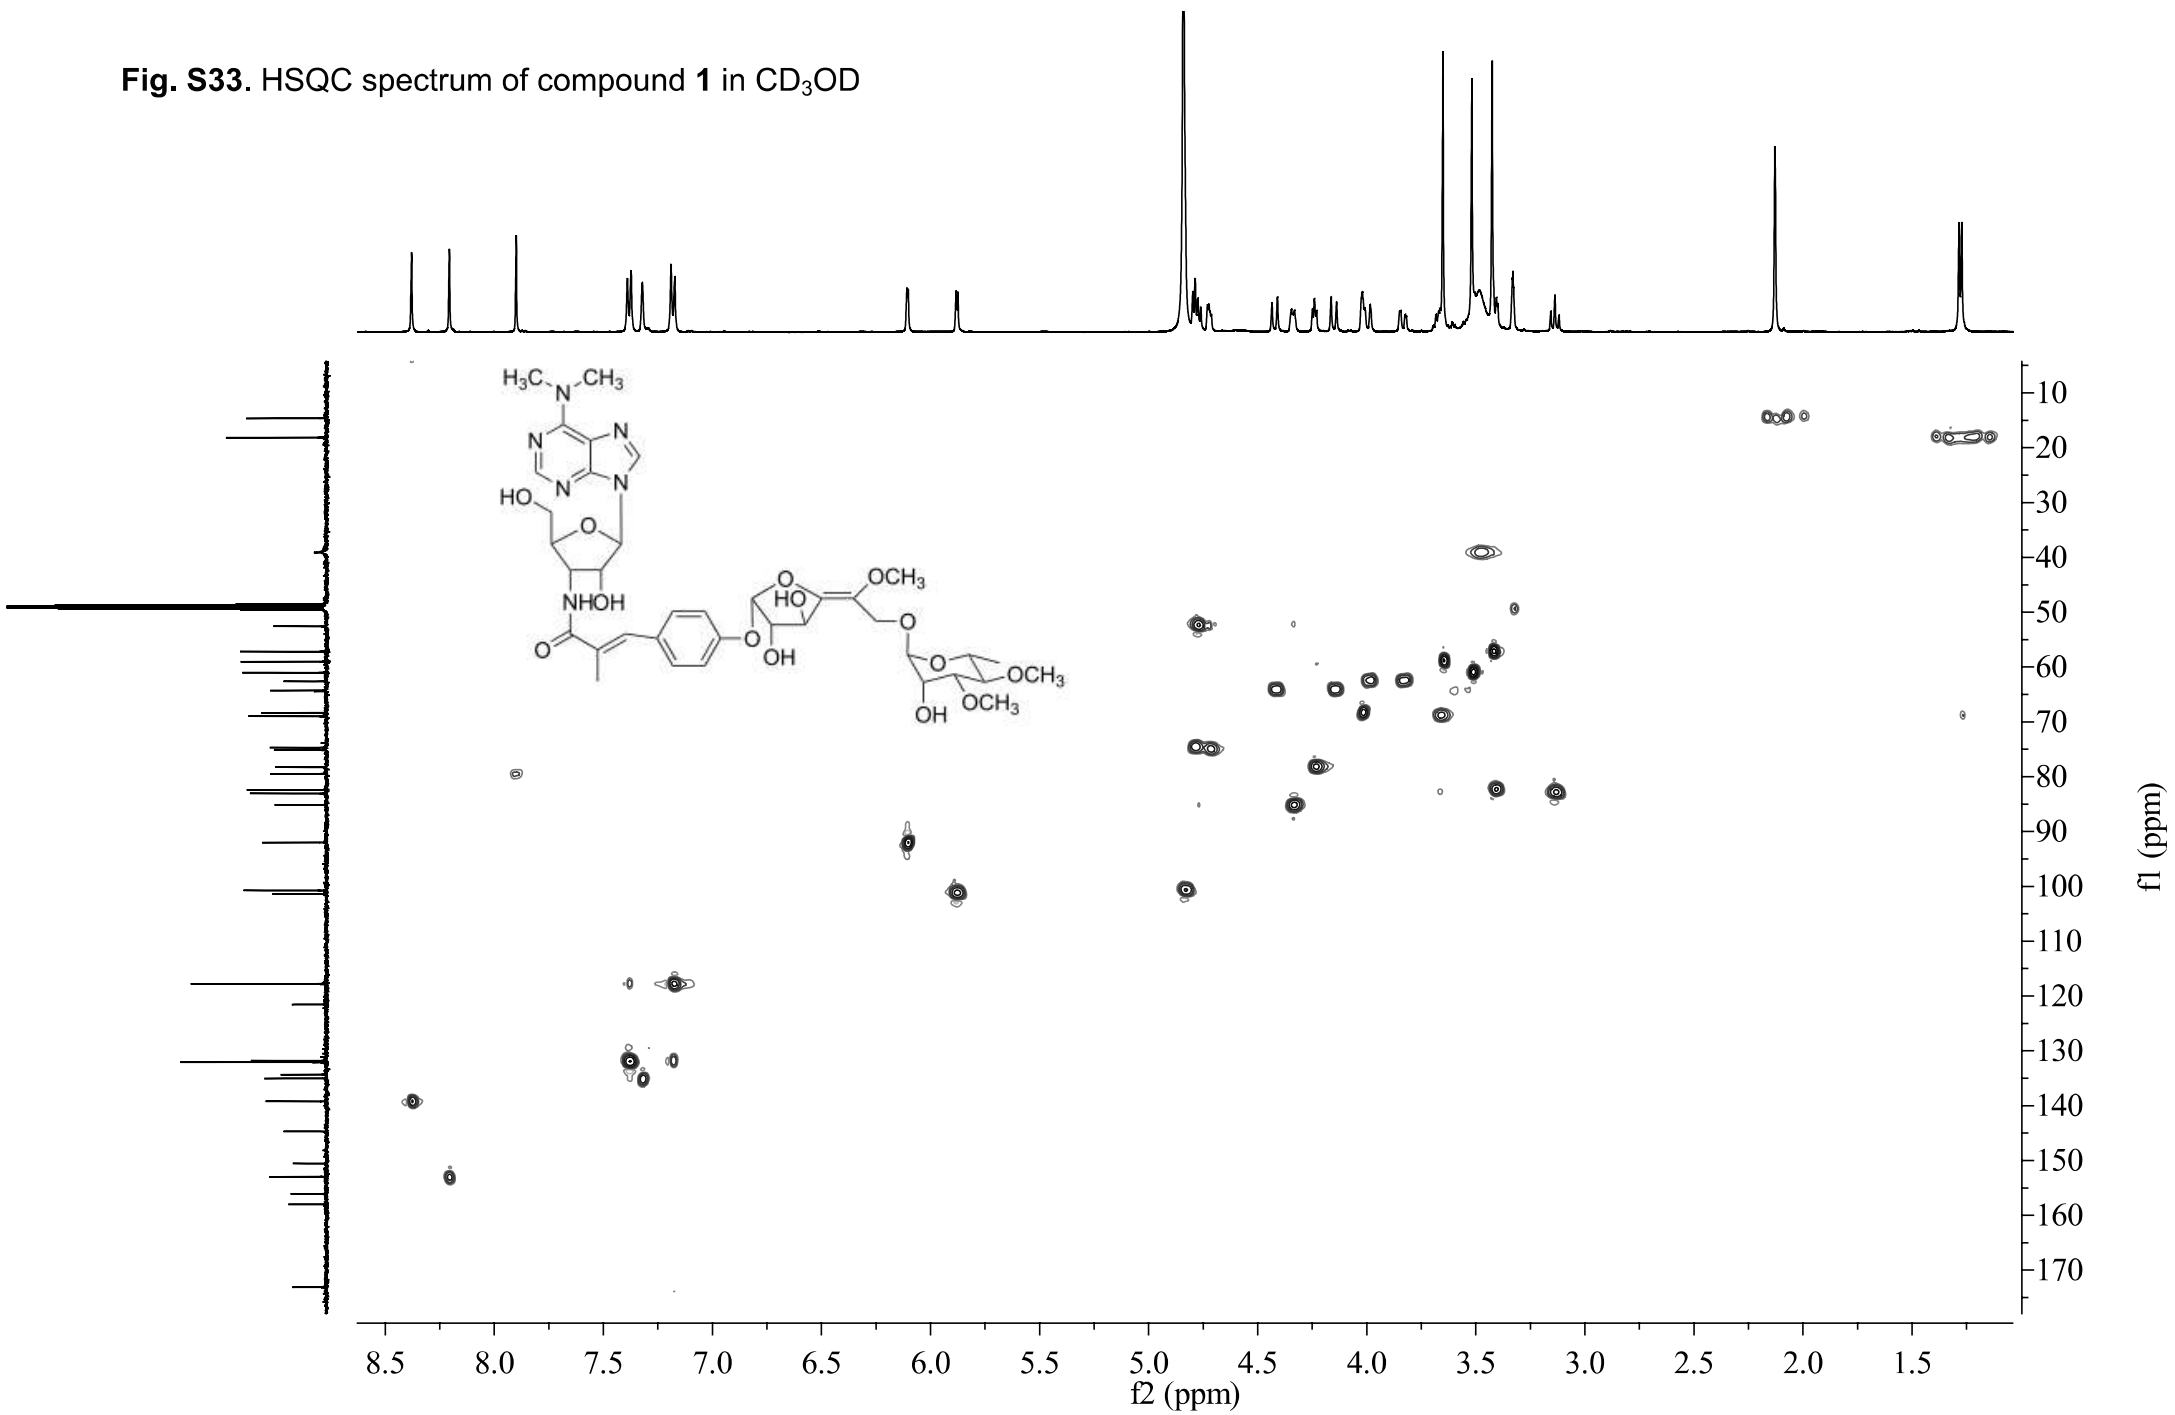

Fig. S34.  $^1\text{H}$ - $^1\text{H}$  COSY spectrum of compound **1** in  $\text{CD}_3\text{OD}$

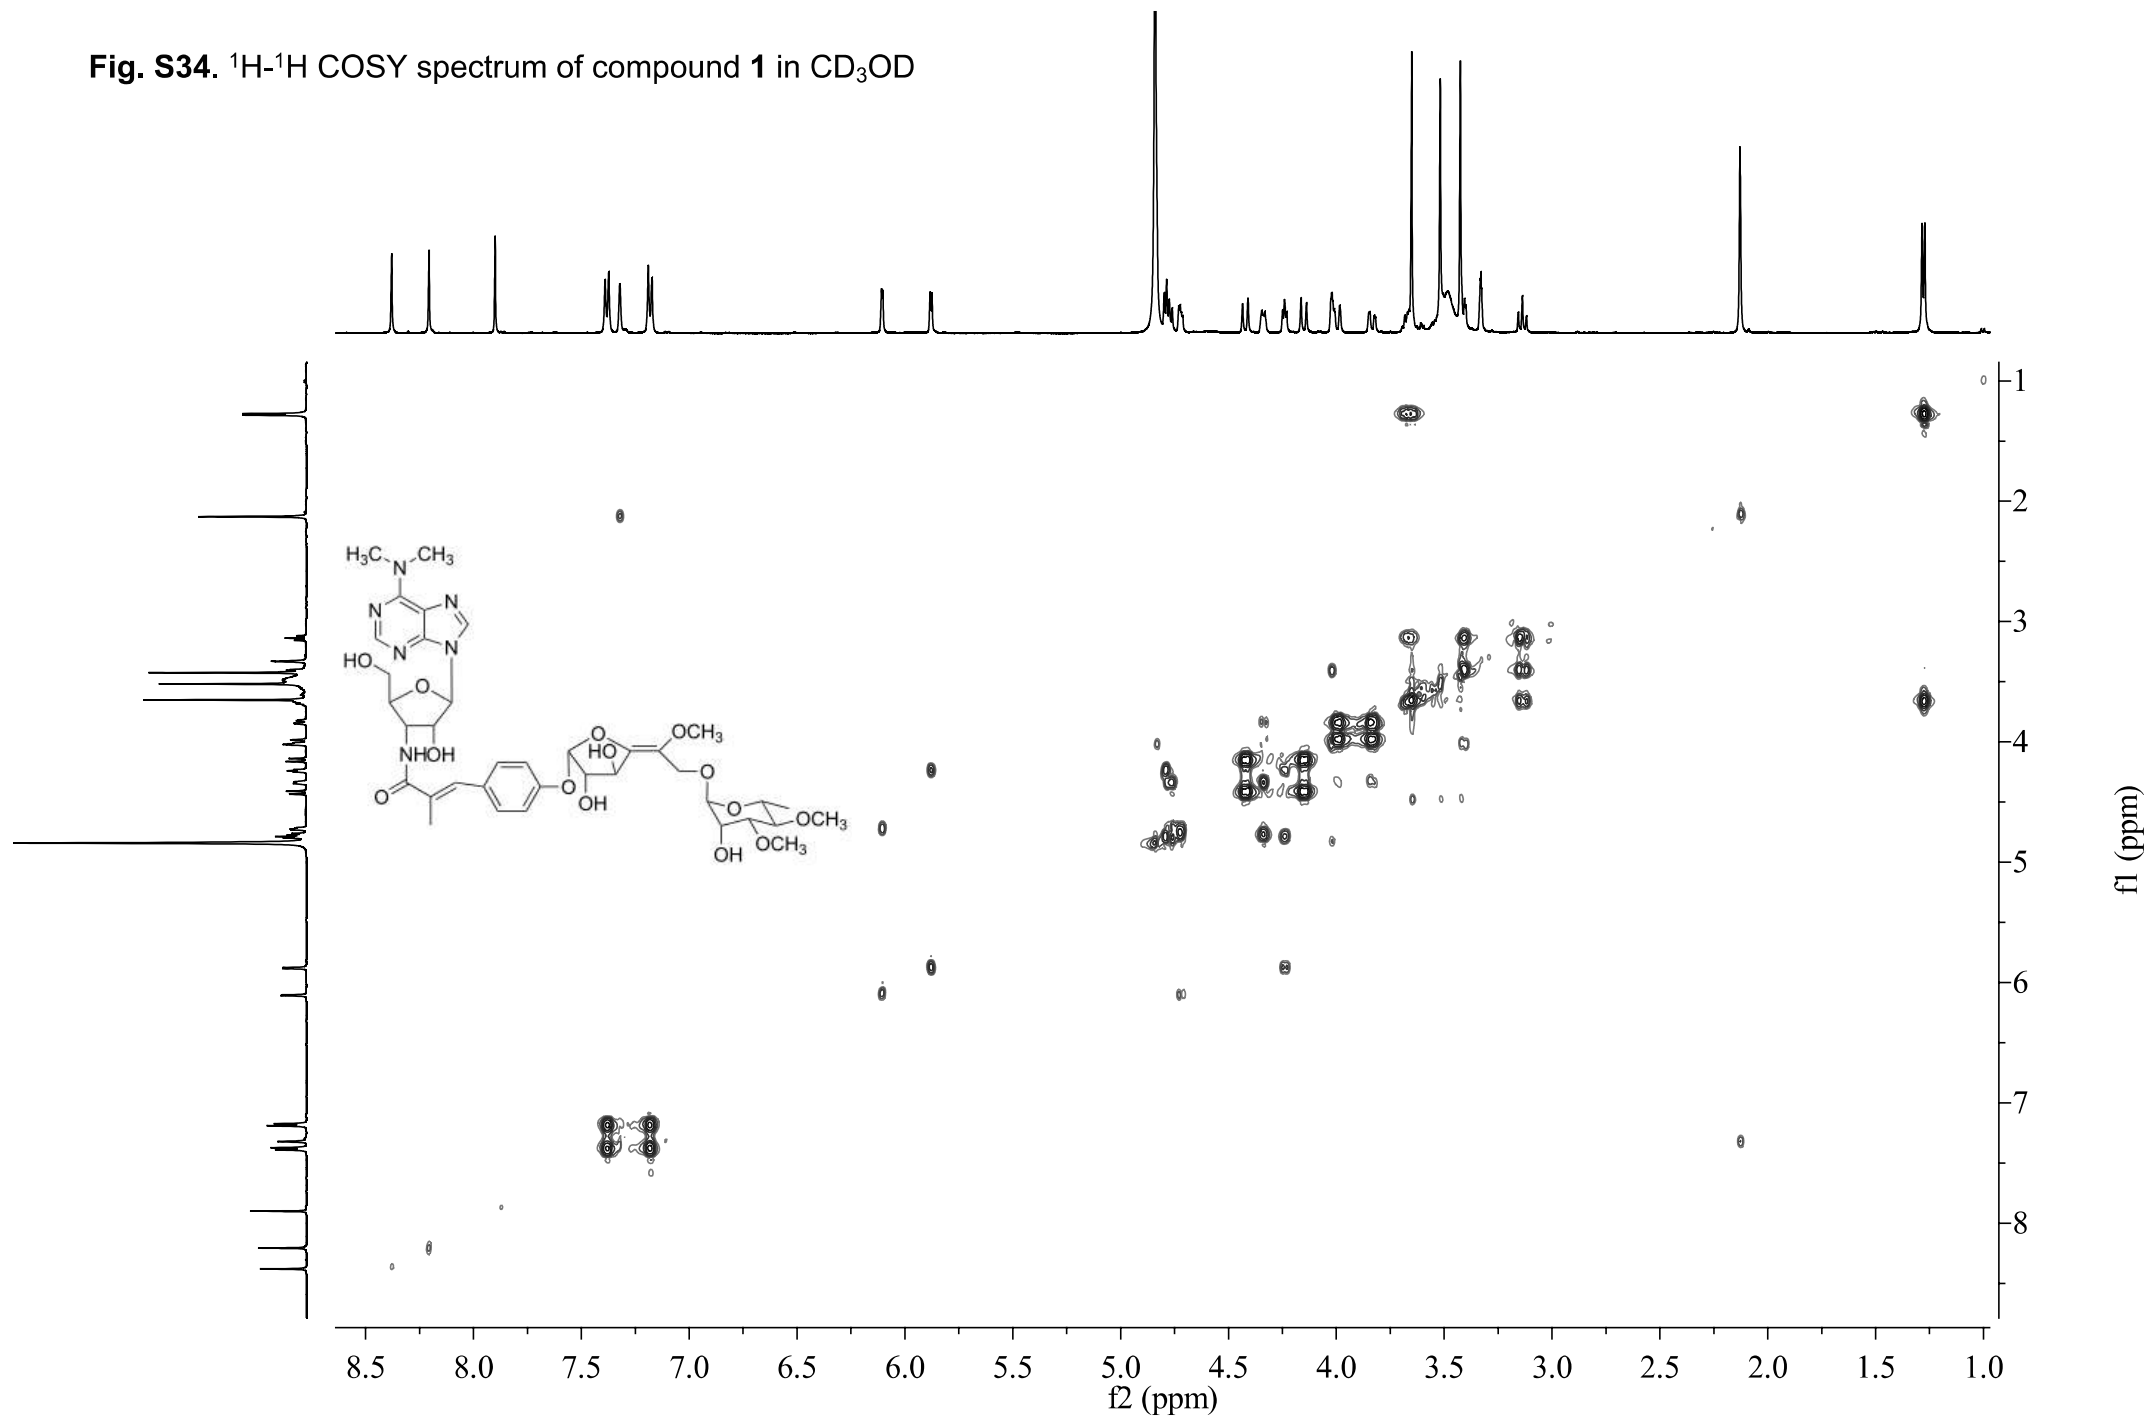



Fig. S35. HMBC spectrum of compound 1 in CD<sub>3</sub>OD

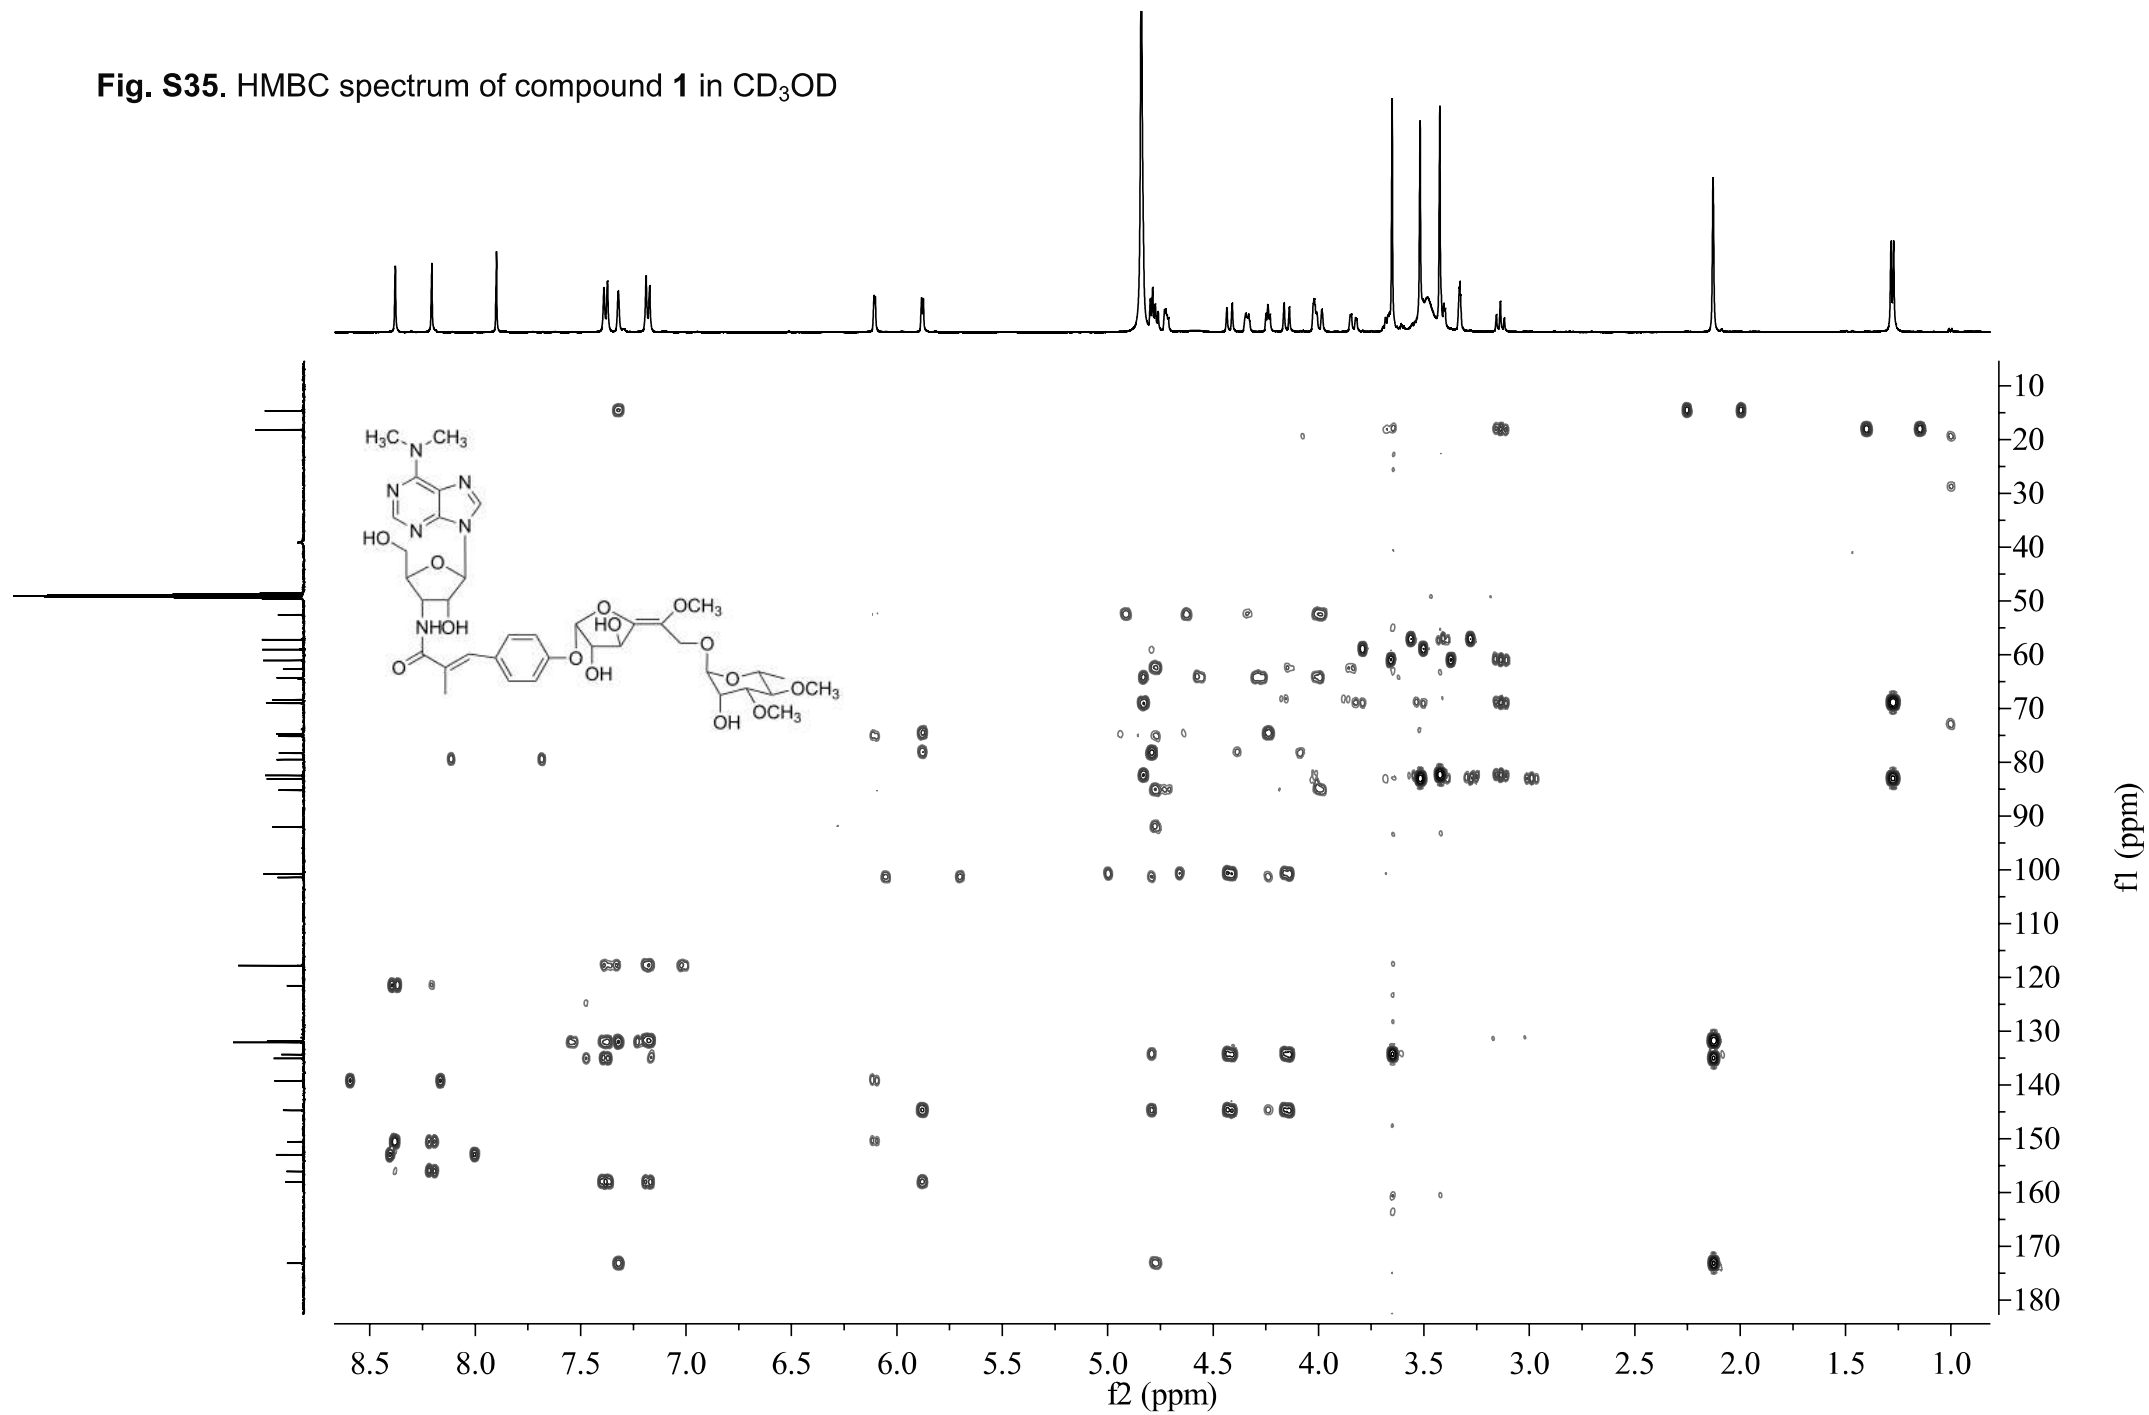

Fig. S36. NOESY spectrum of compound **1** in CD<sub>3</sub>OD

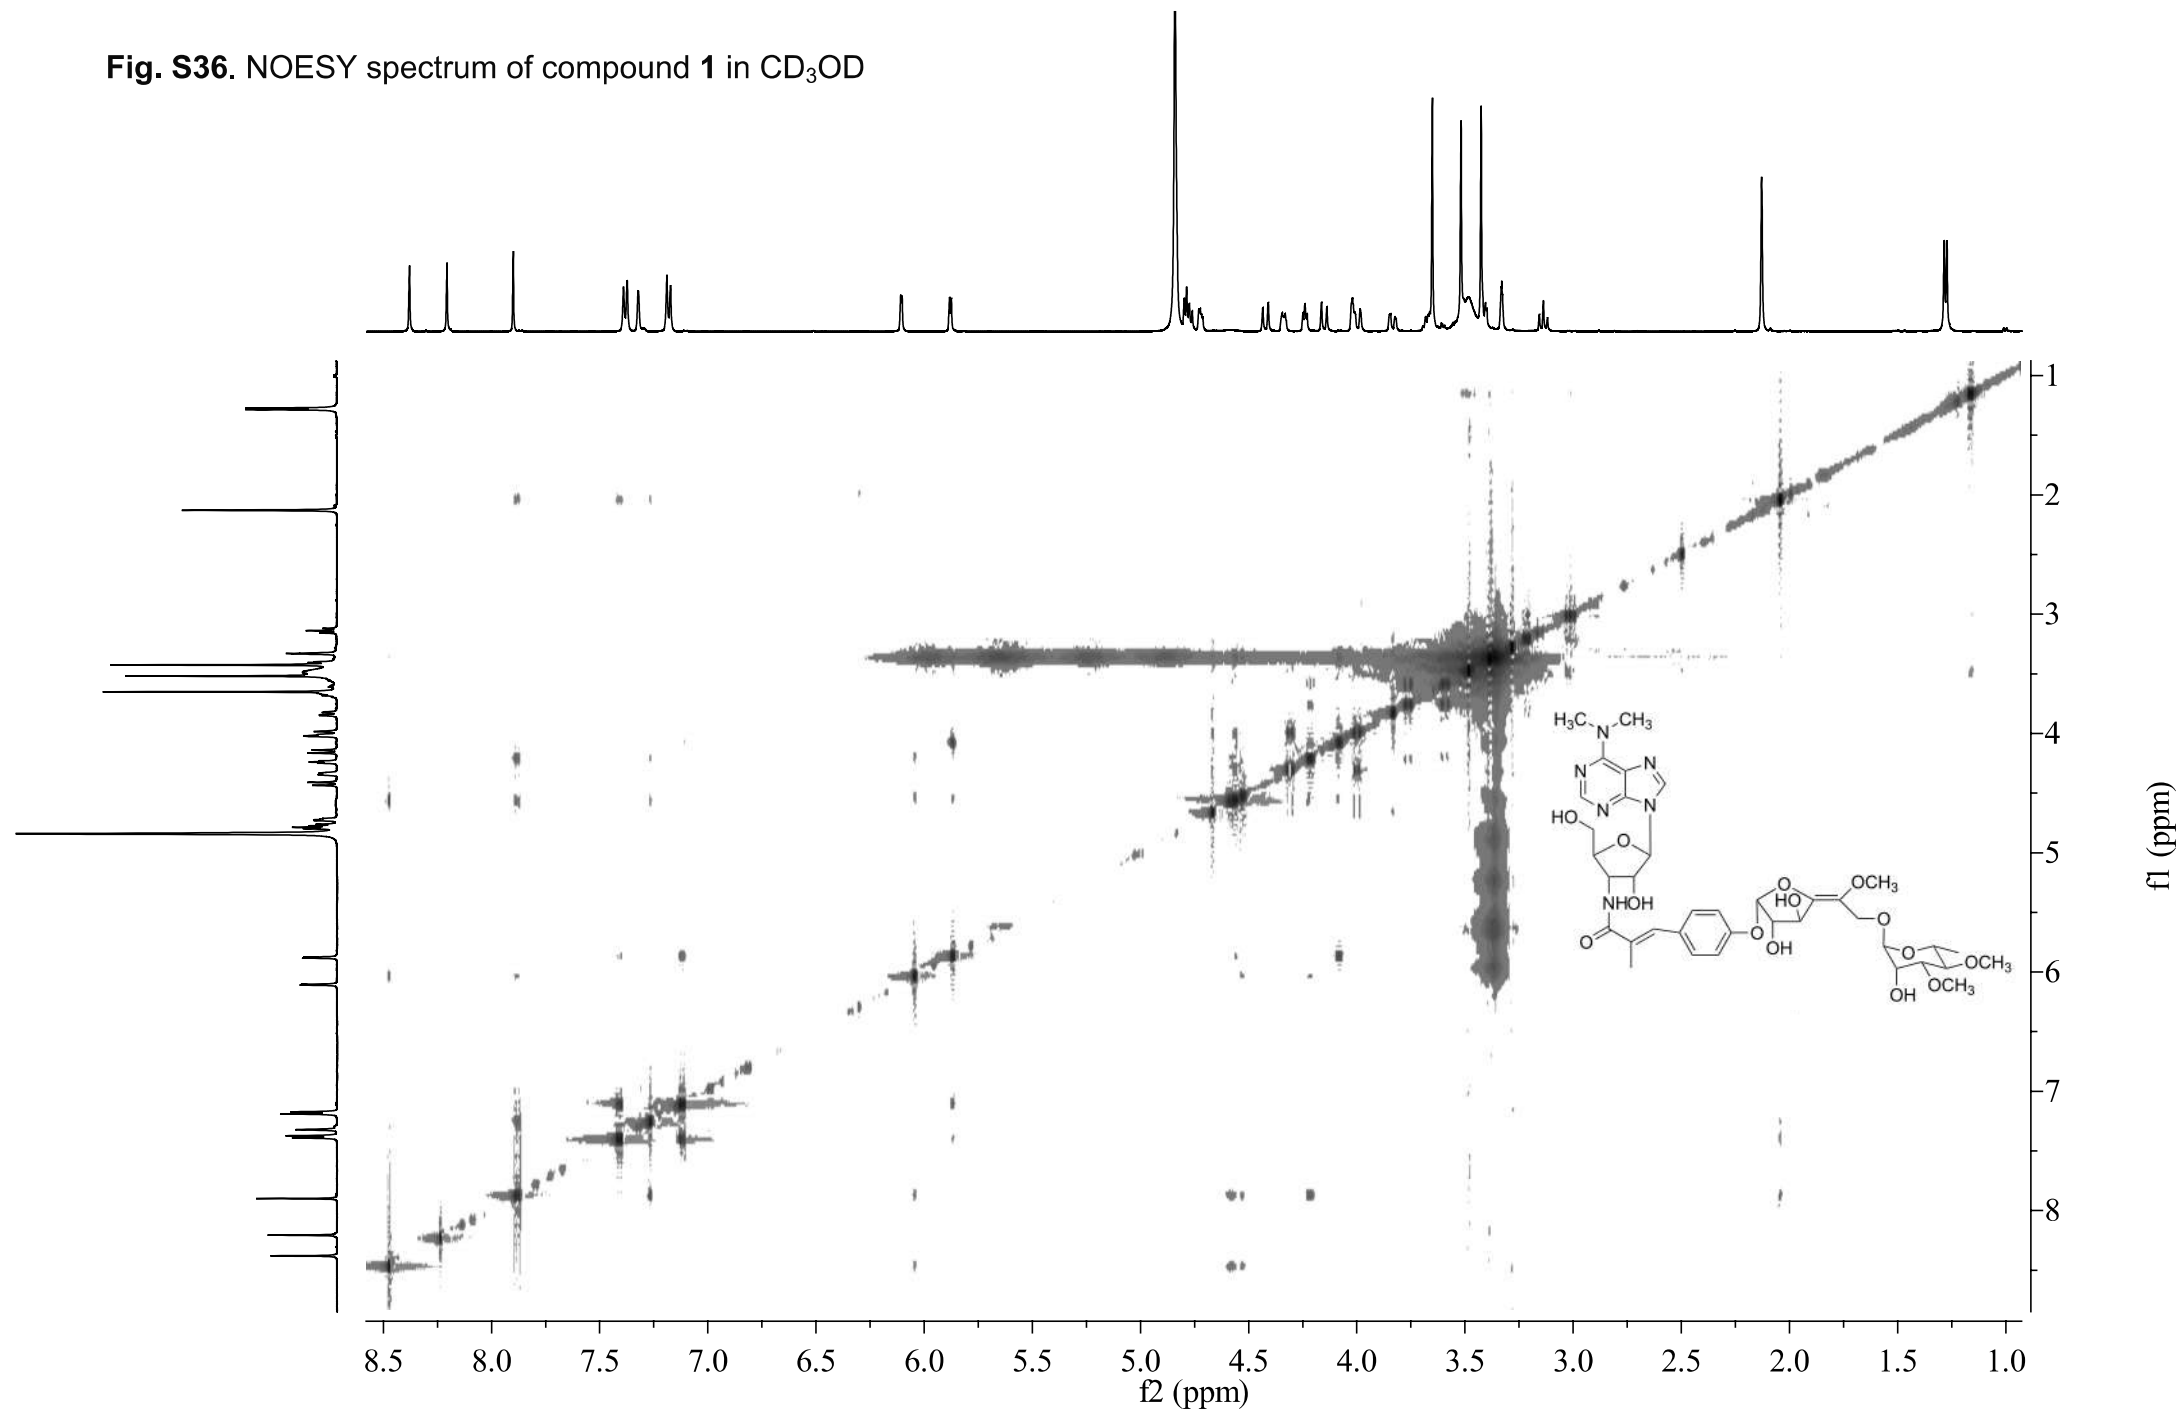

Fig. S37. <sup>1</sup>H NMR (500 MHz) spectrum of compound **2** in CD<sub>3</sub>OD

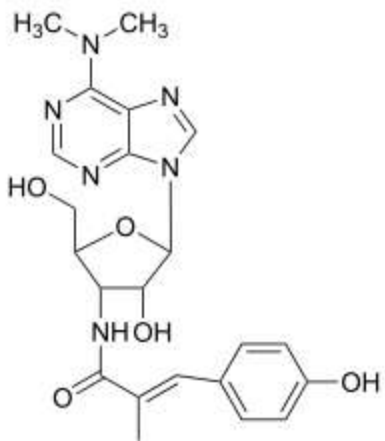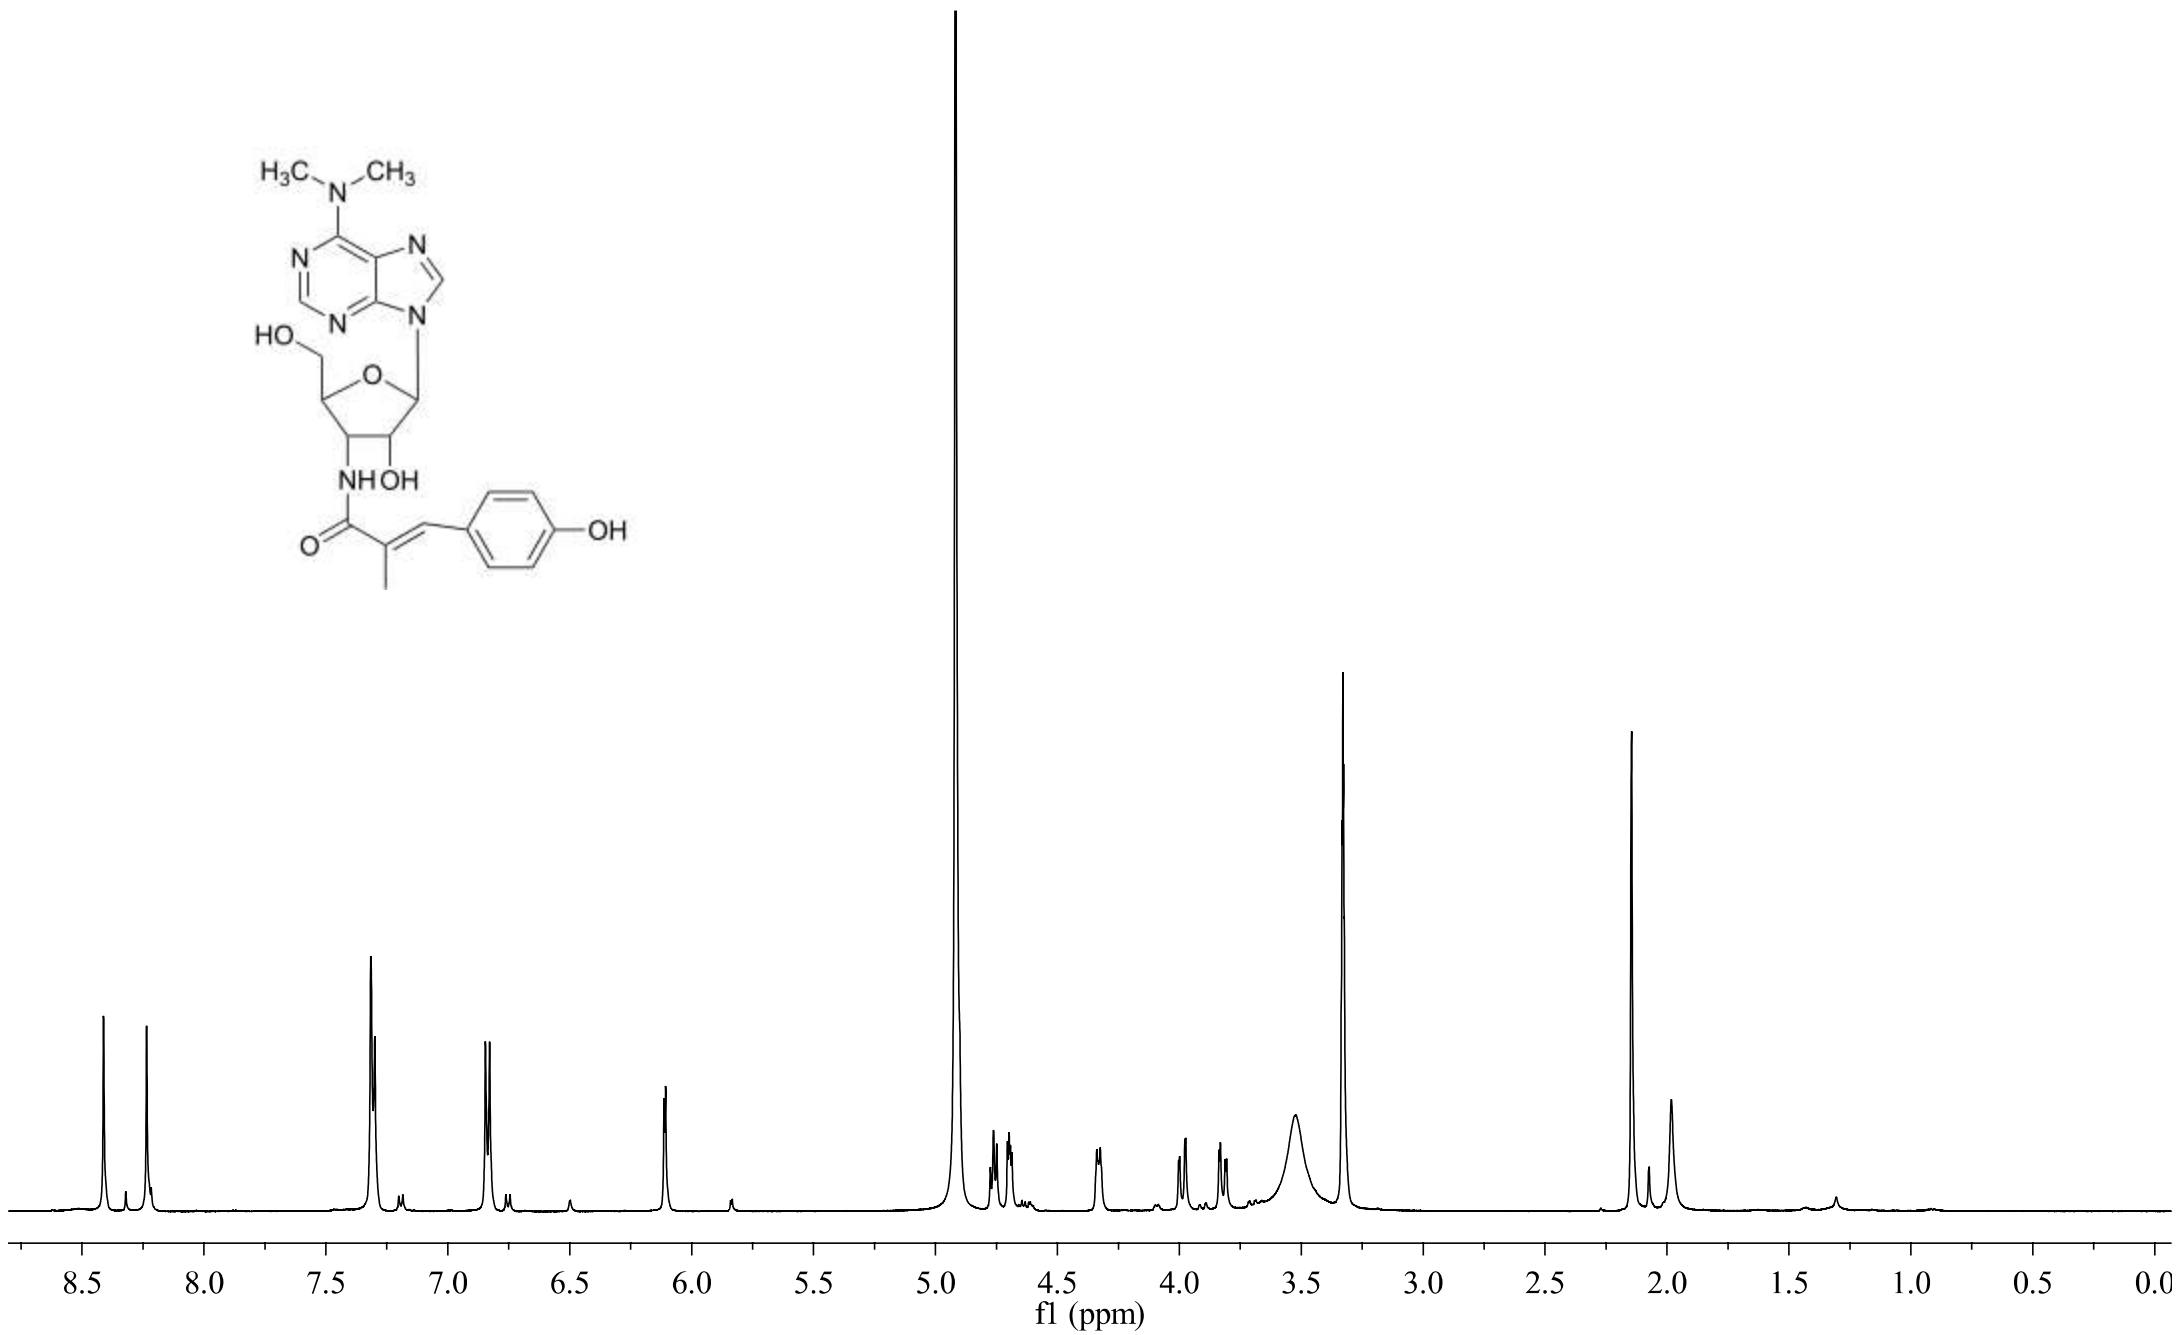



Fig. S39. <sup>1</sup>H NMR (500 MHz) spectrum of compound 3 in CD<sub>3</sub>OD

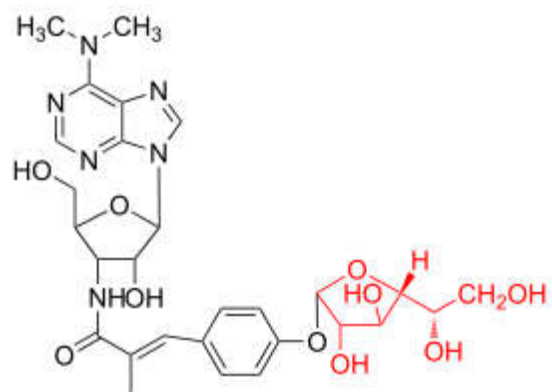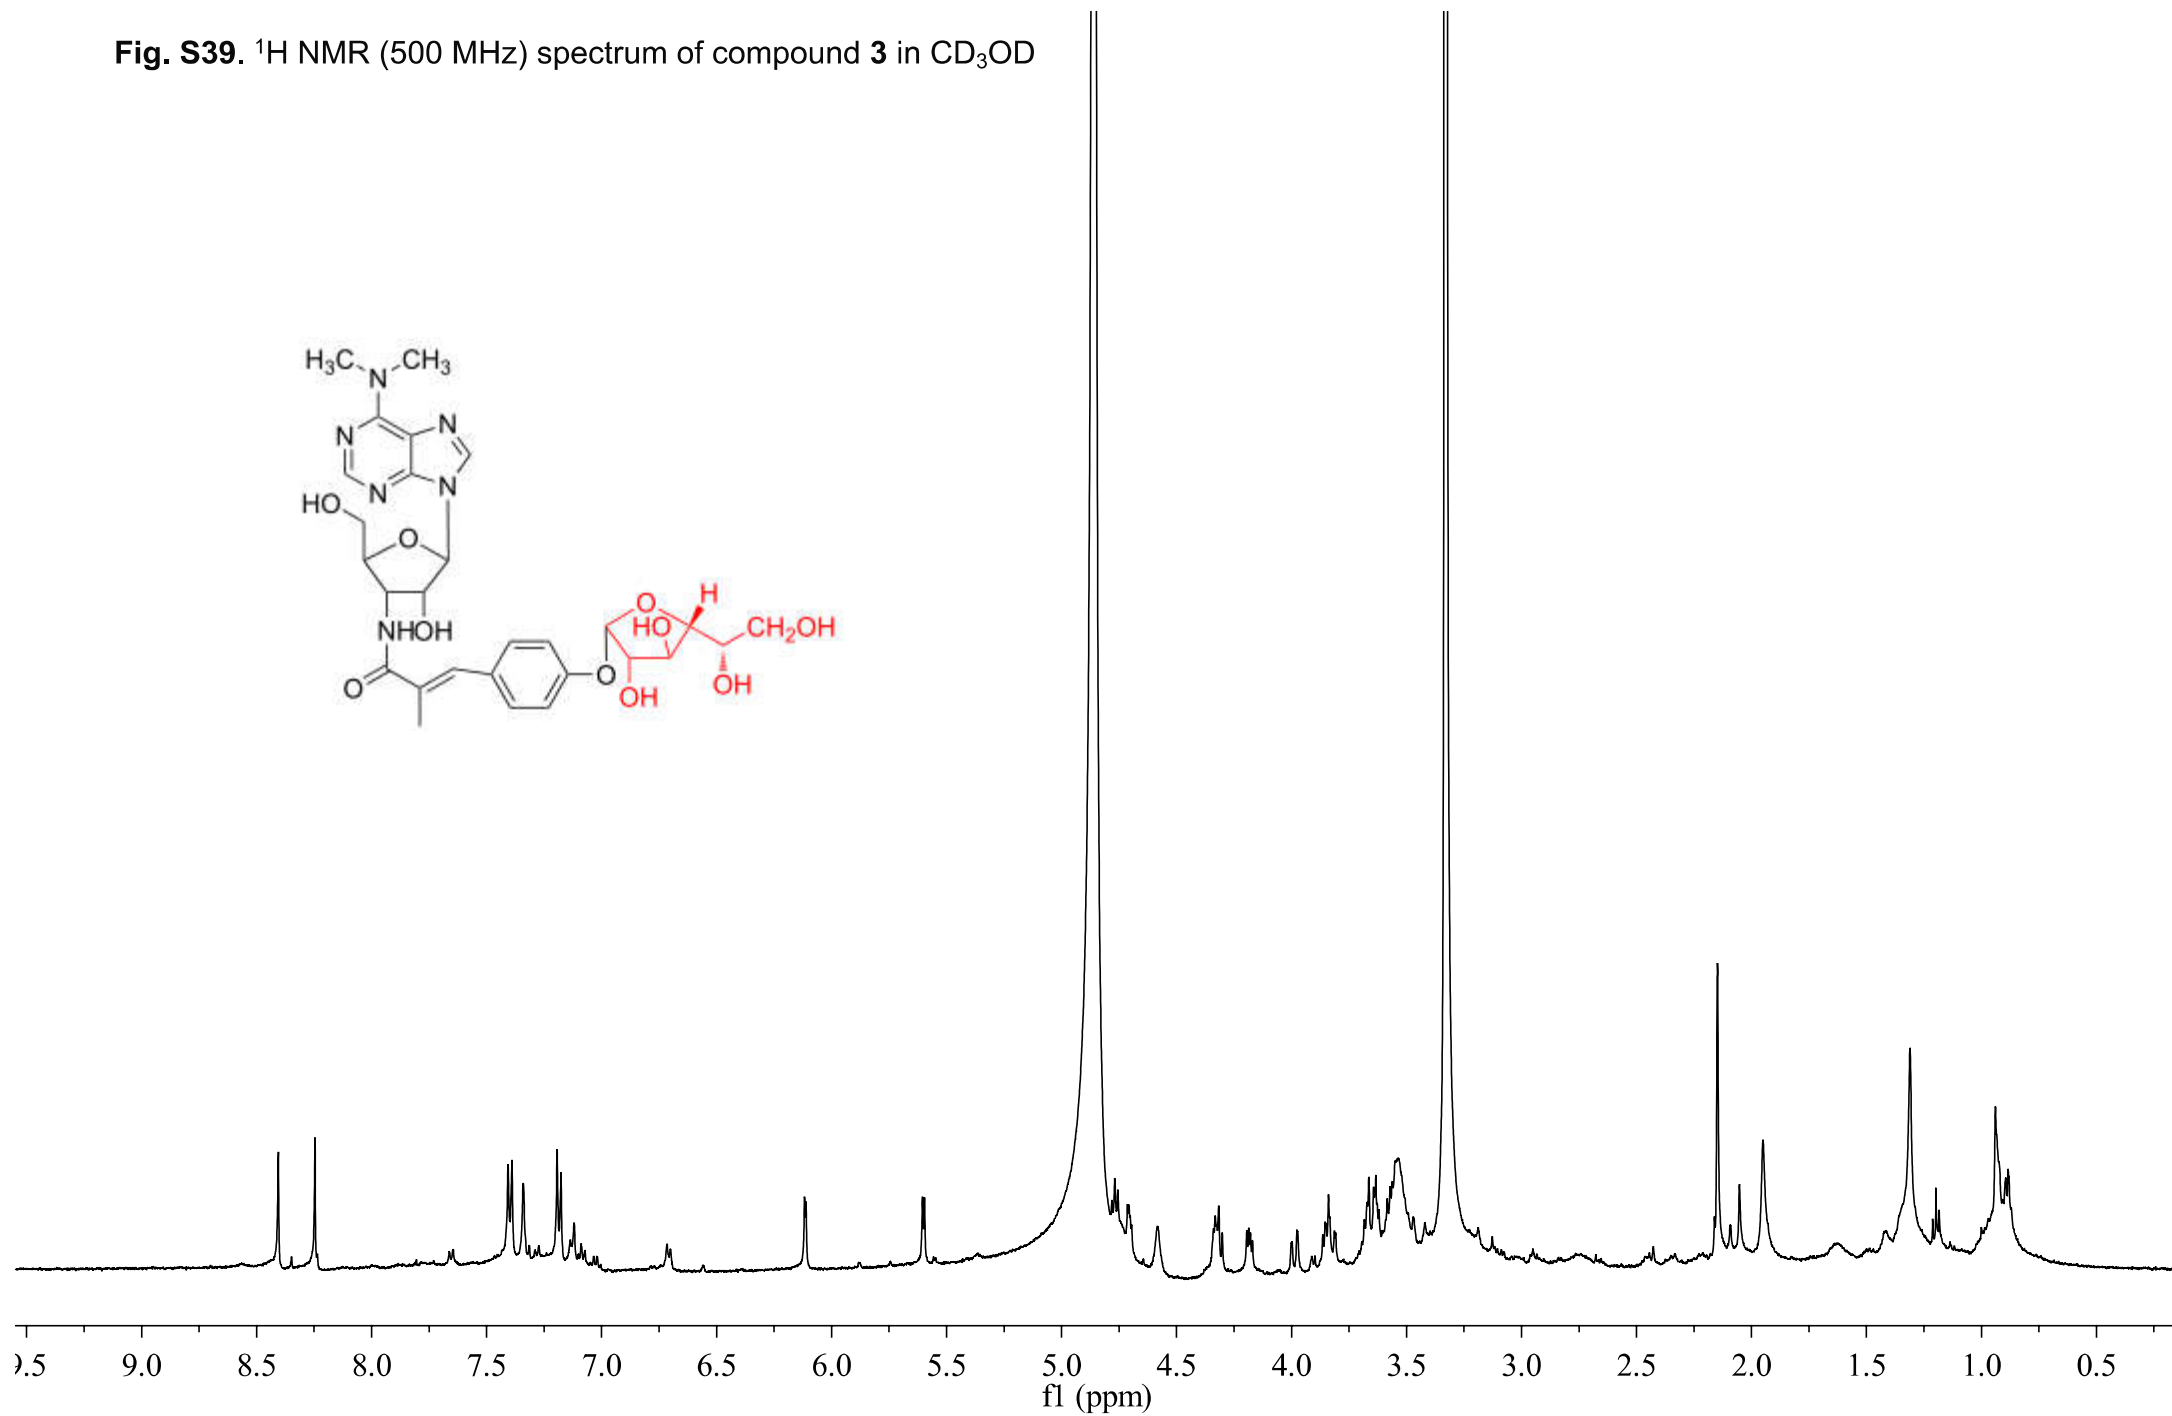

**Fig. S40.** HSQC spectrum of compound **3** in CD<sub>3</sub>OD

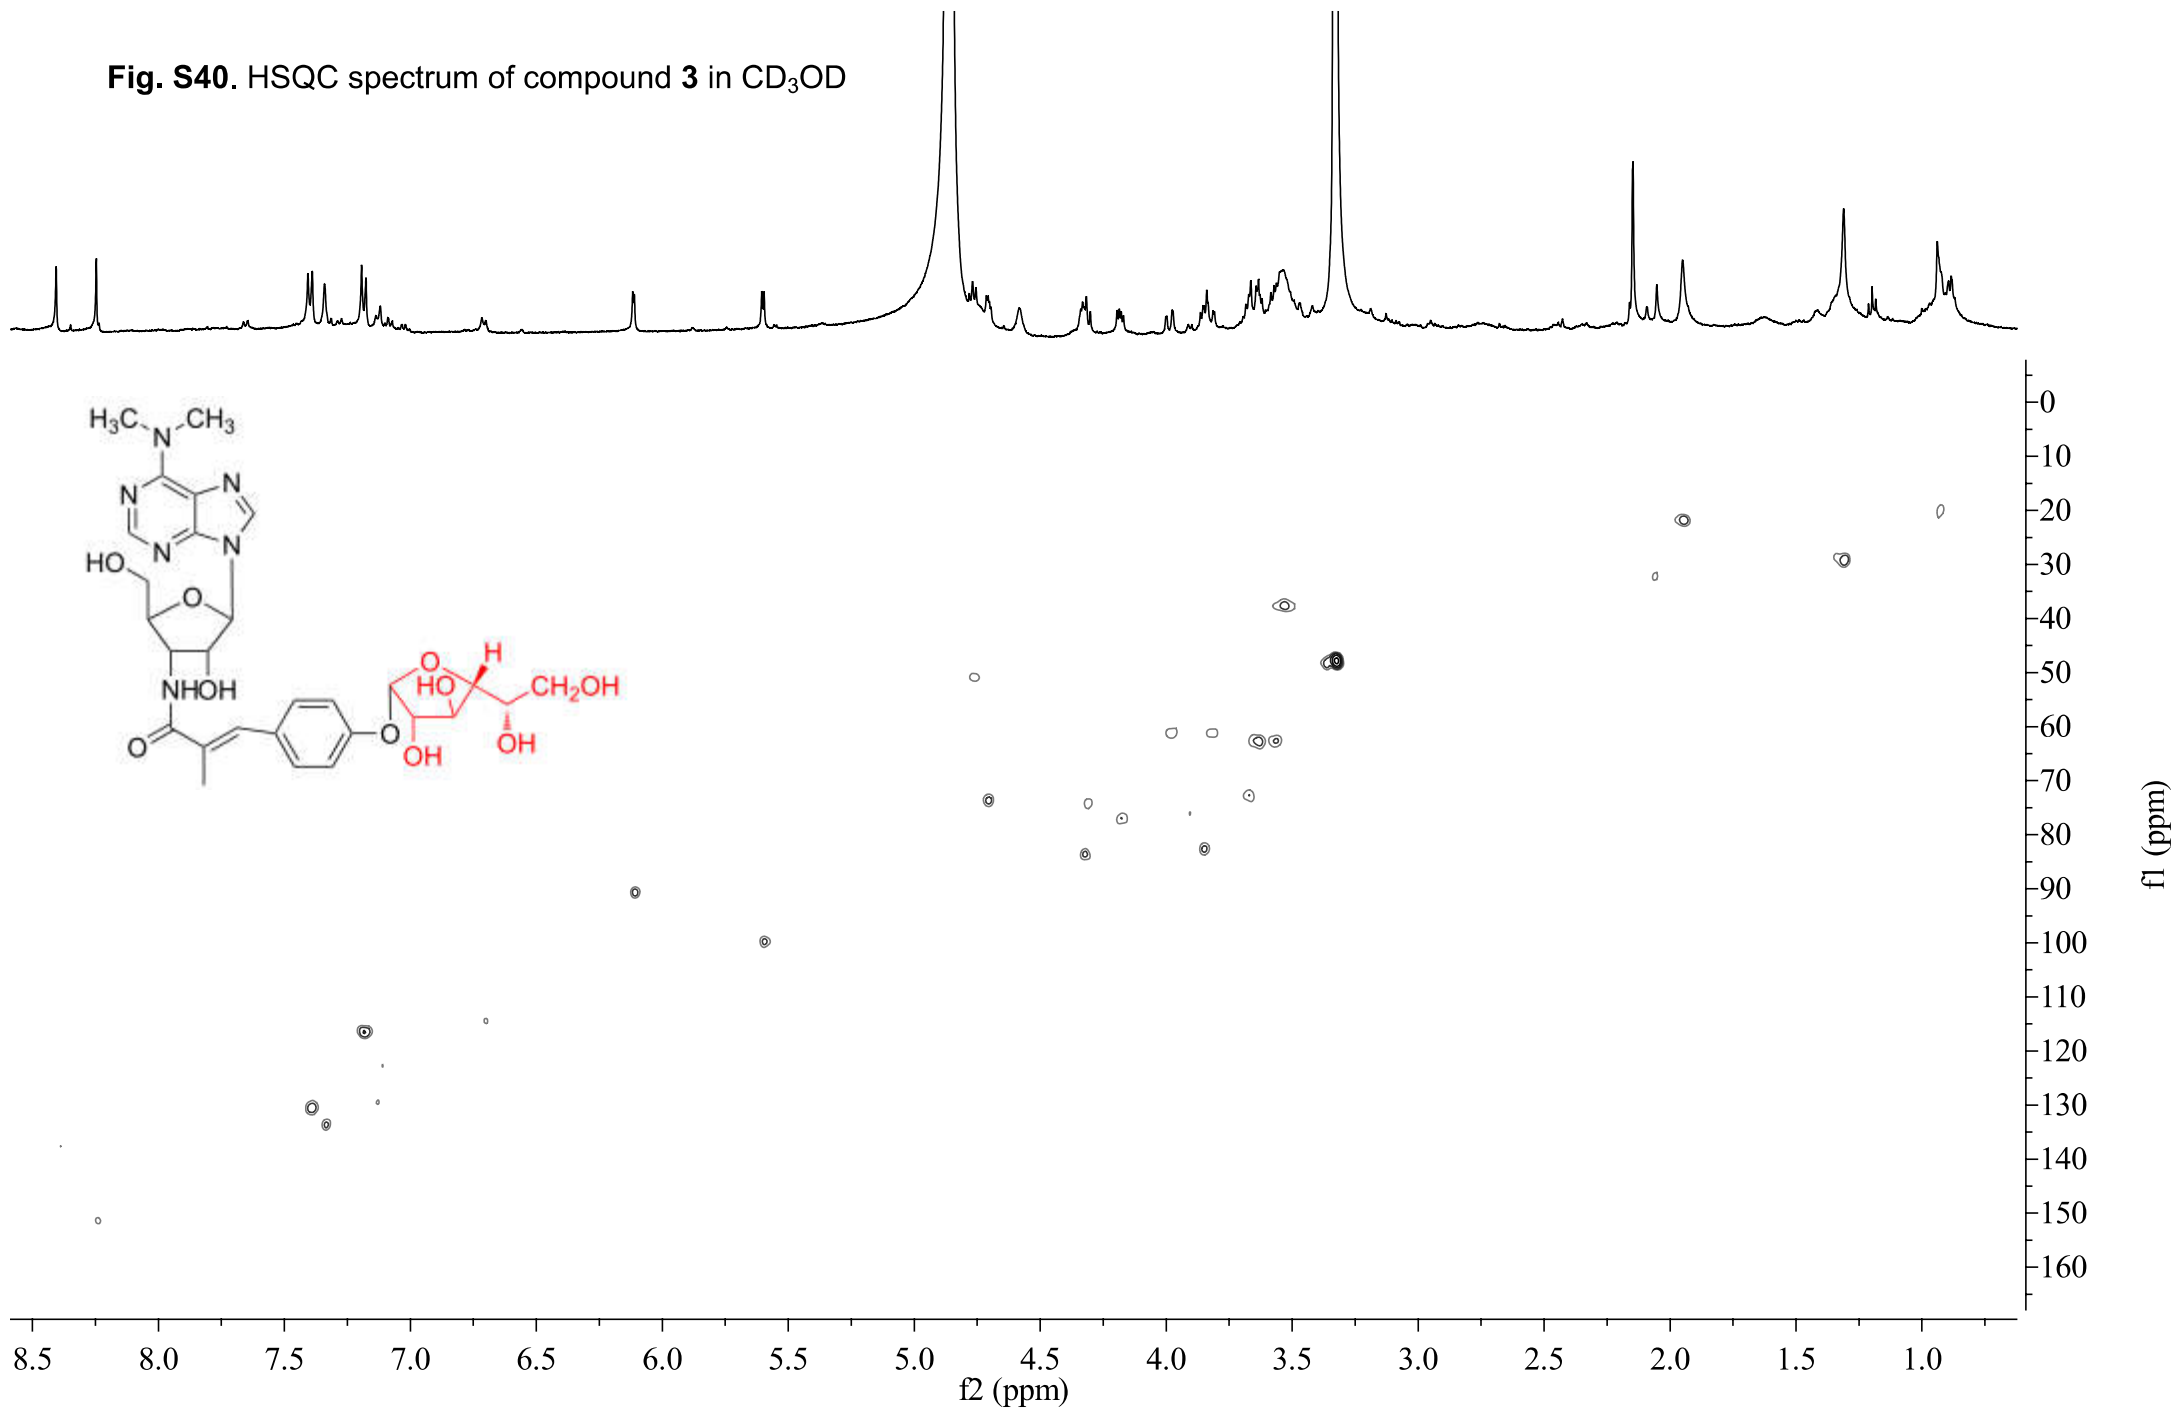

Fig. S41.  $^1\text{H}$ - $^1\text{H}$  COSY spectrum of compound **3** in  $\text{CD}_3\text{OD}$

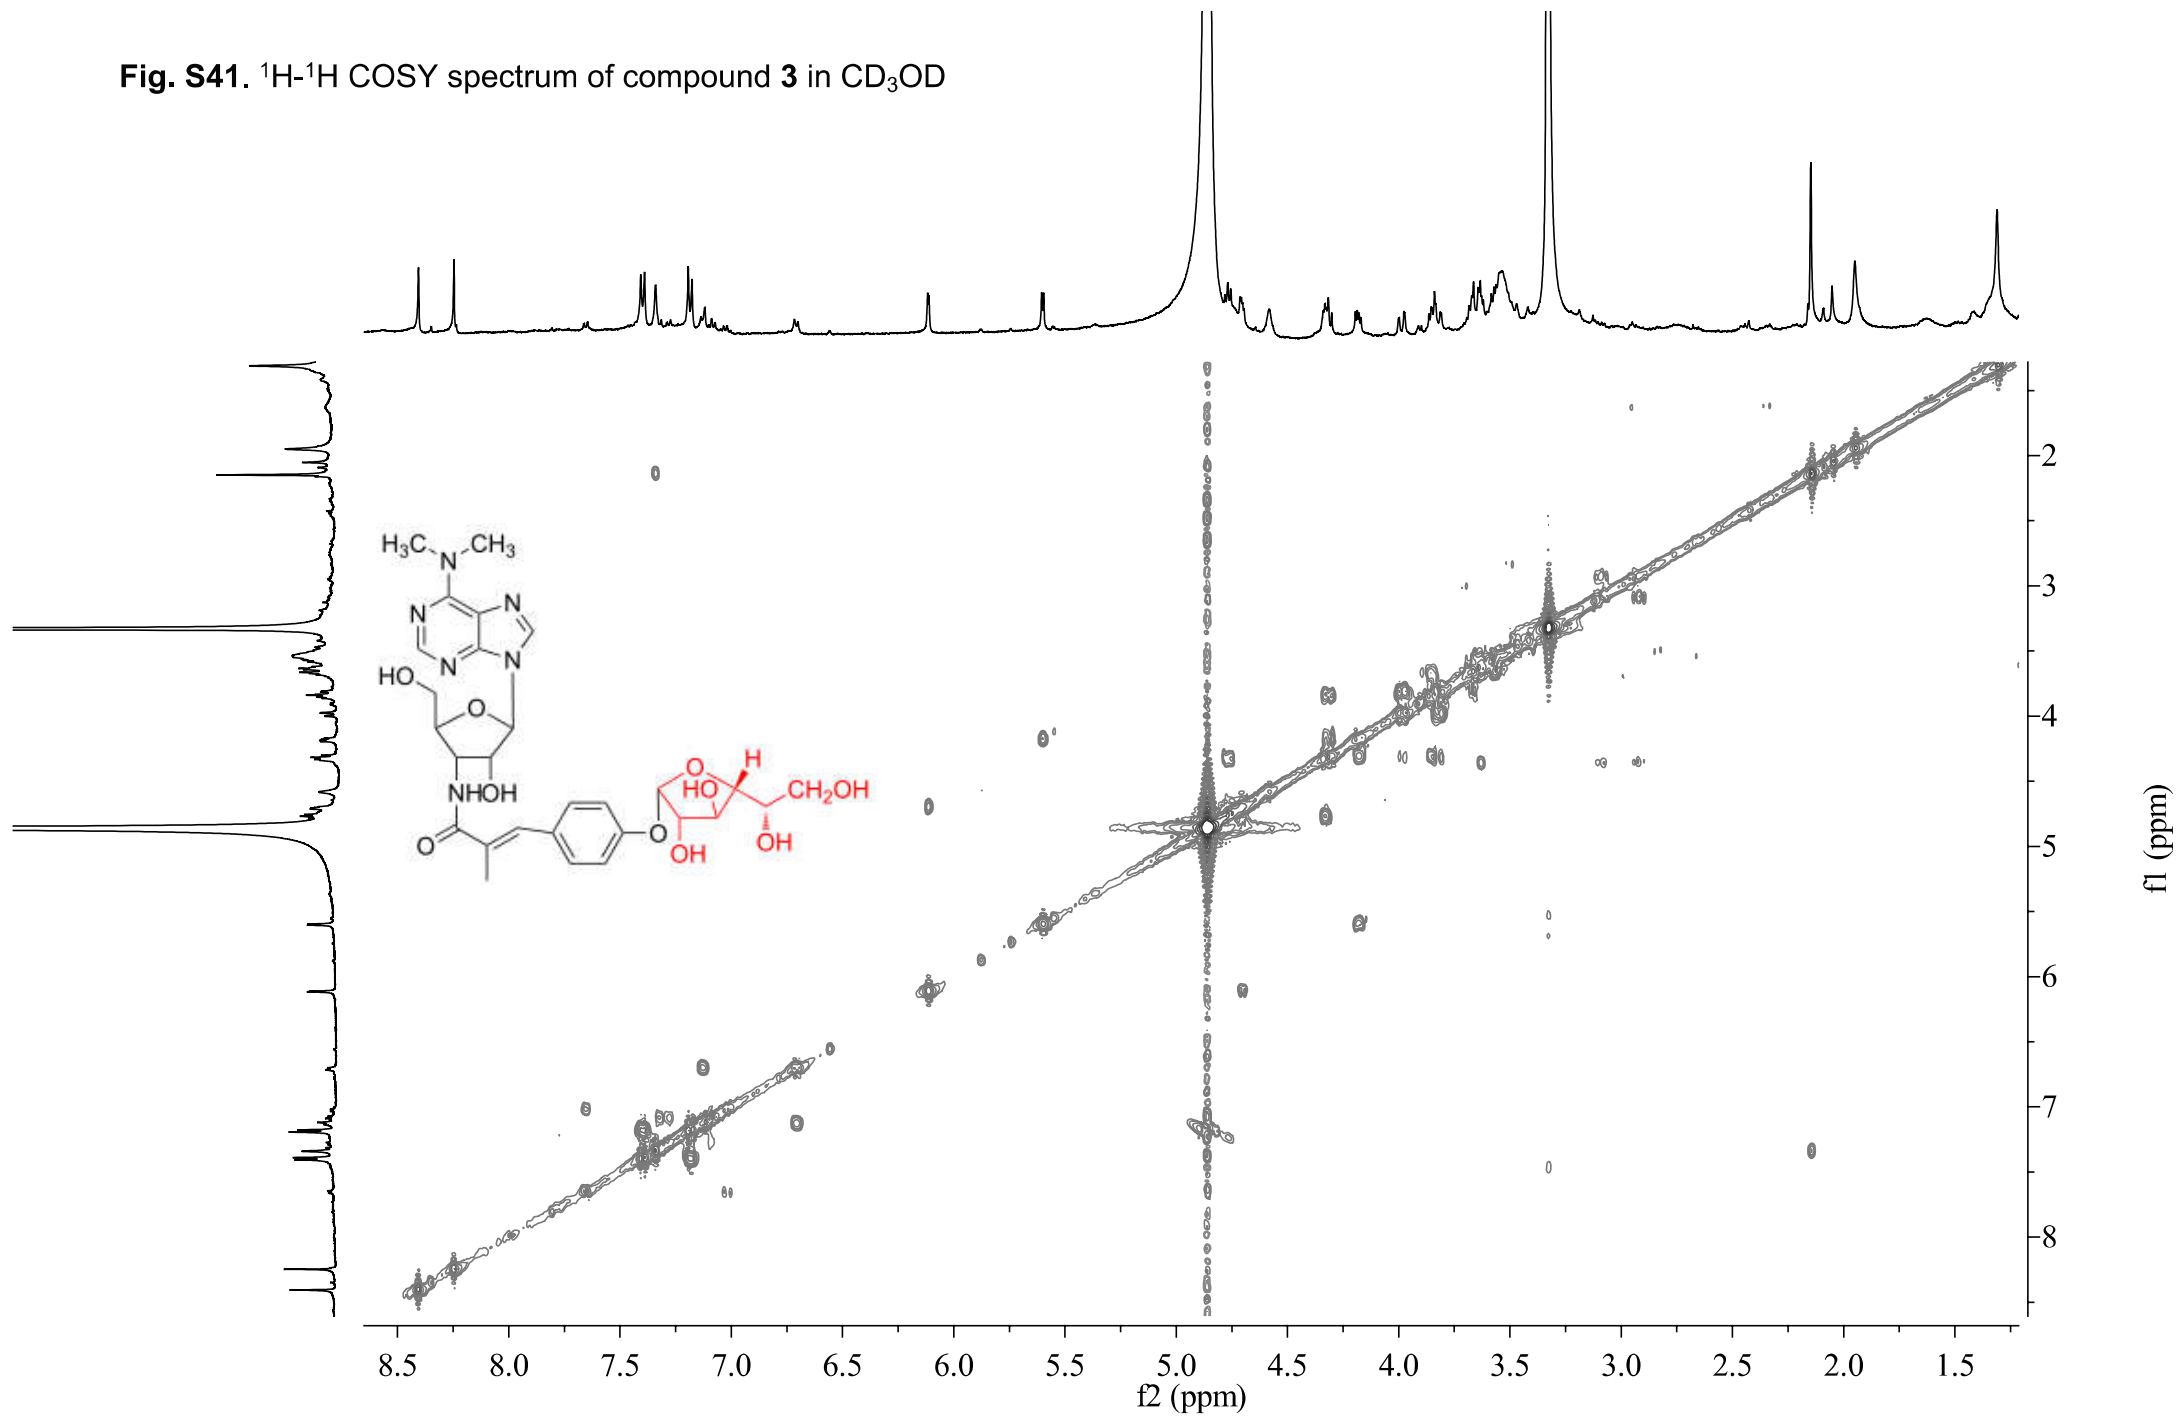

Fig. S42. HMBC spectrum of compound **3** in CD<sub>3</sub>OD

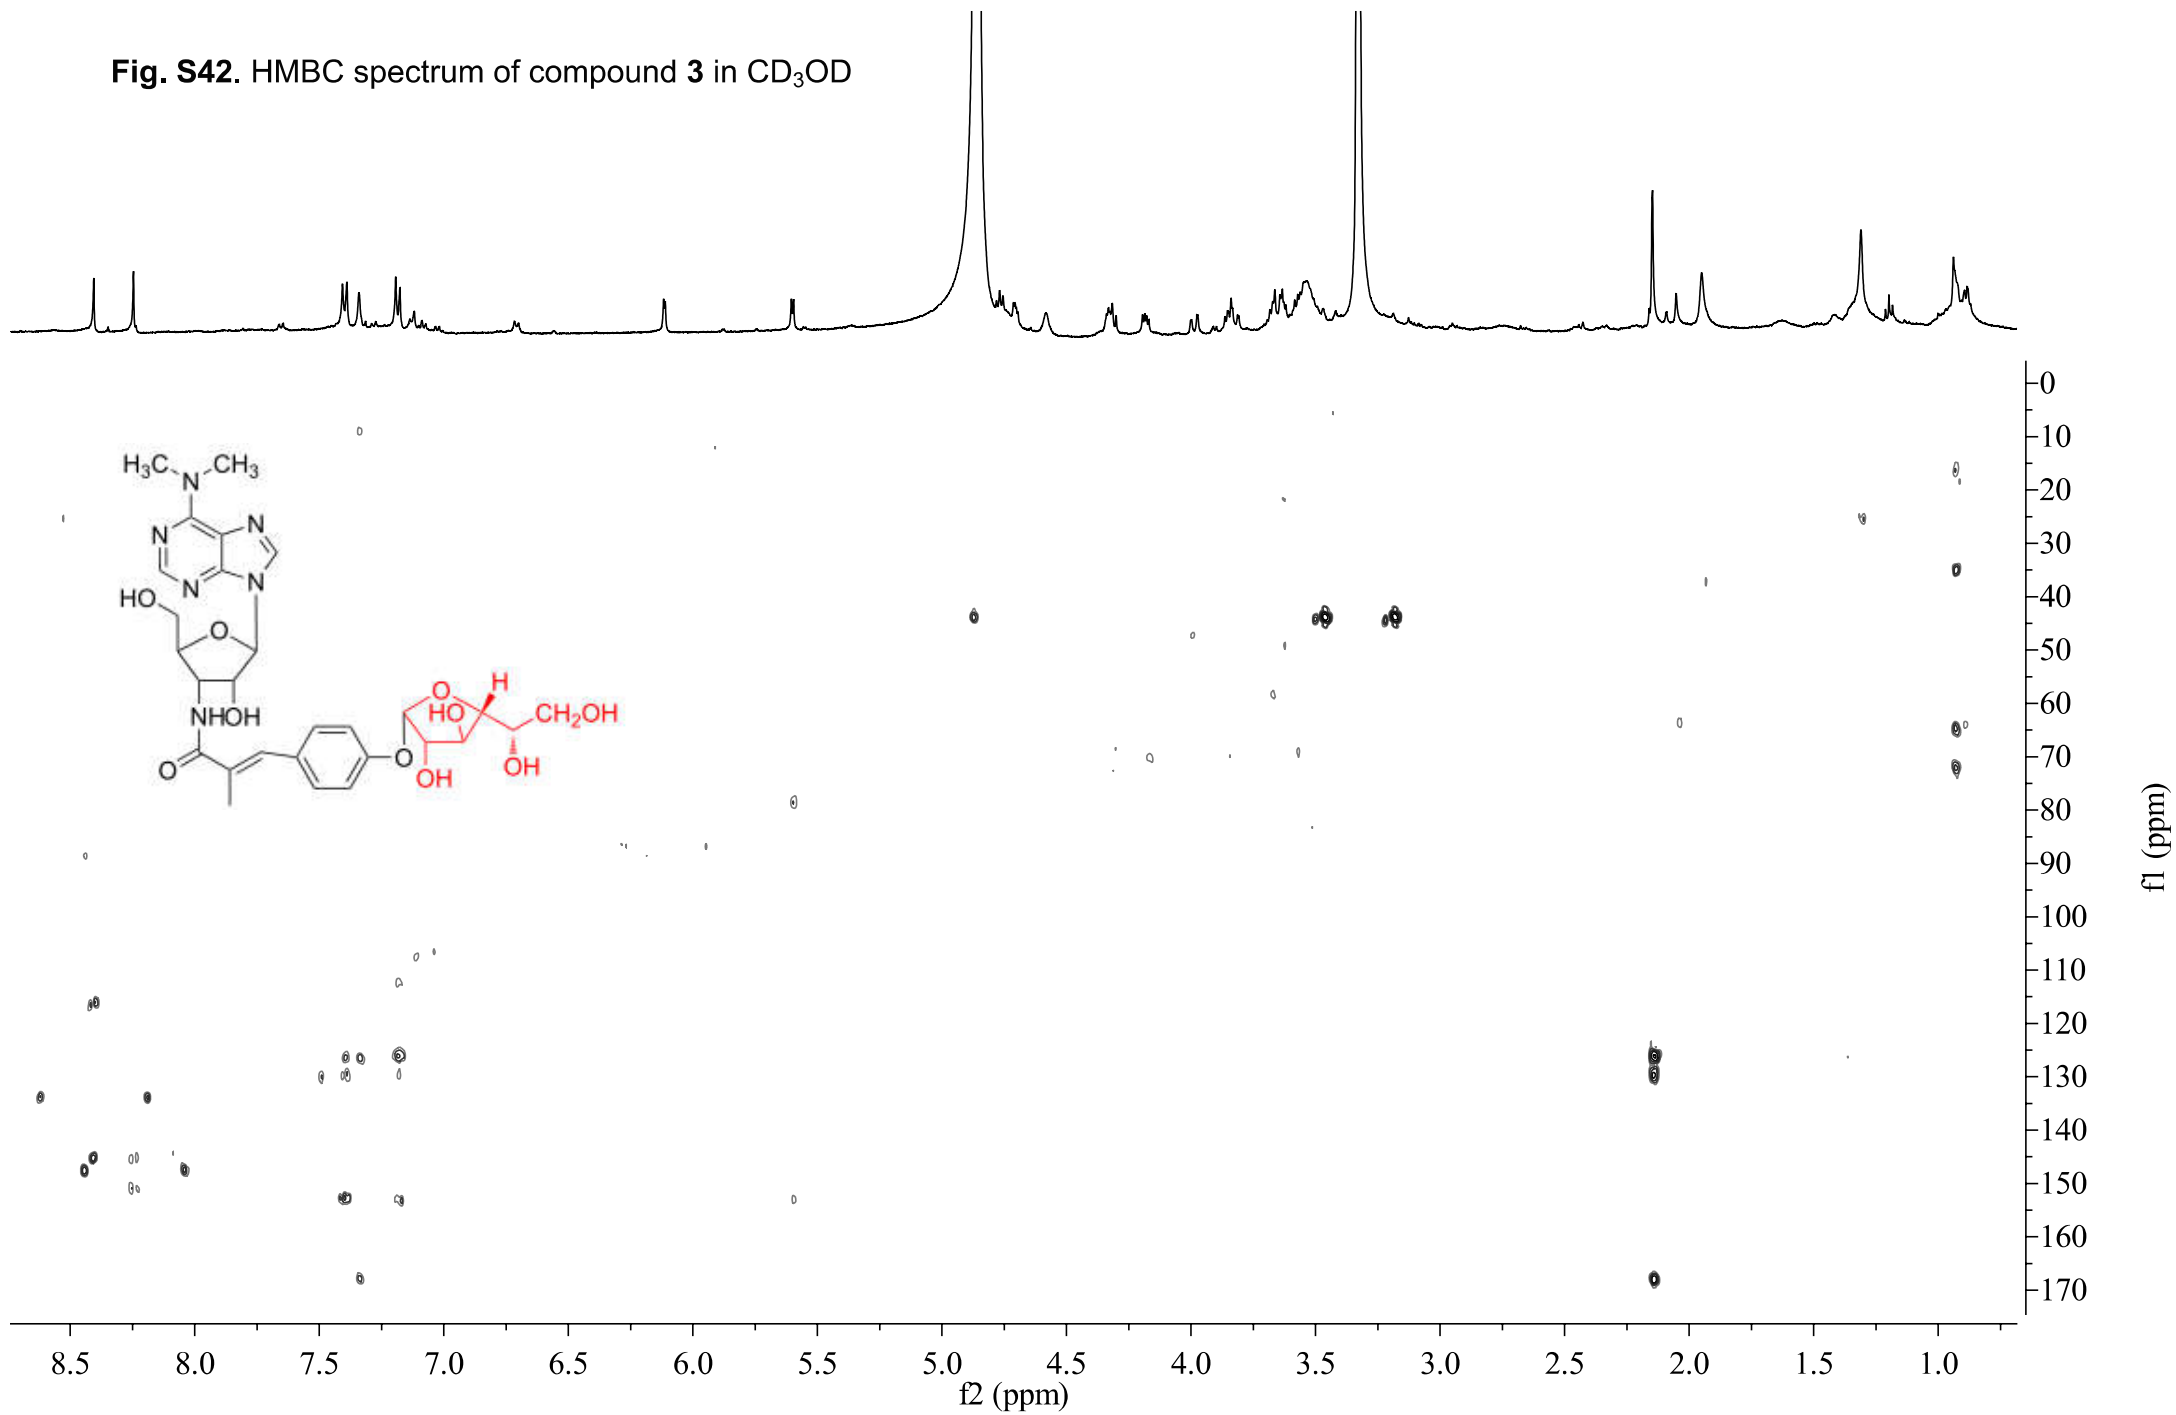



Fig. S43. NOESY spectrum of compound 3 in CD<sub>3</sub>OD

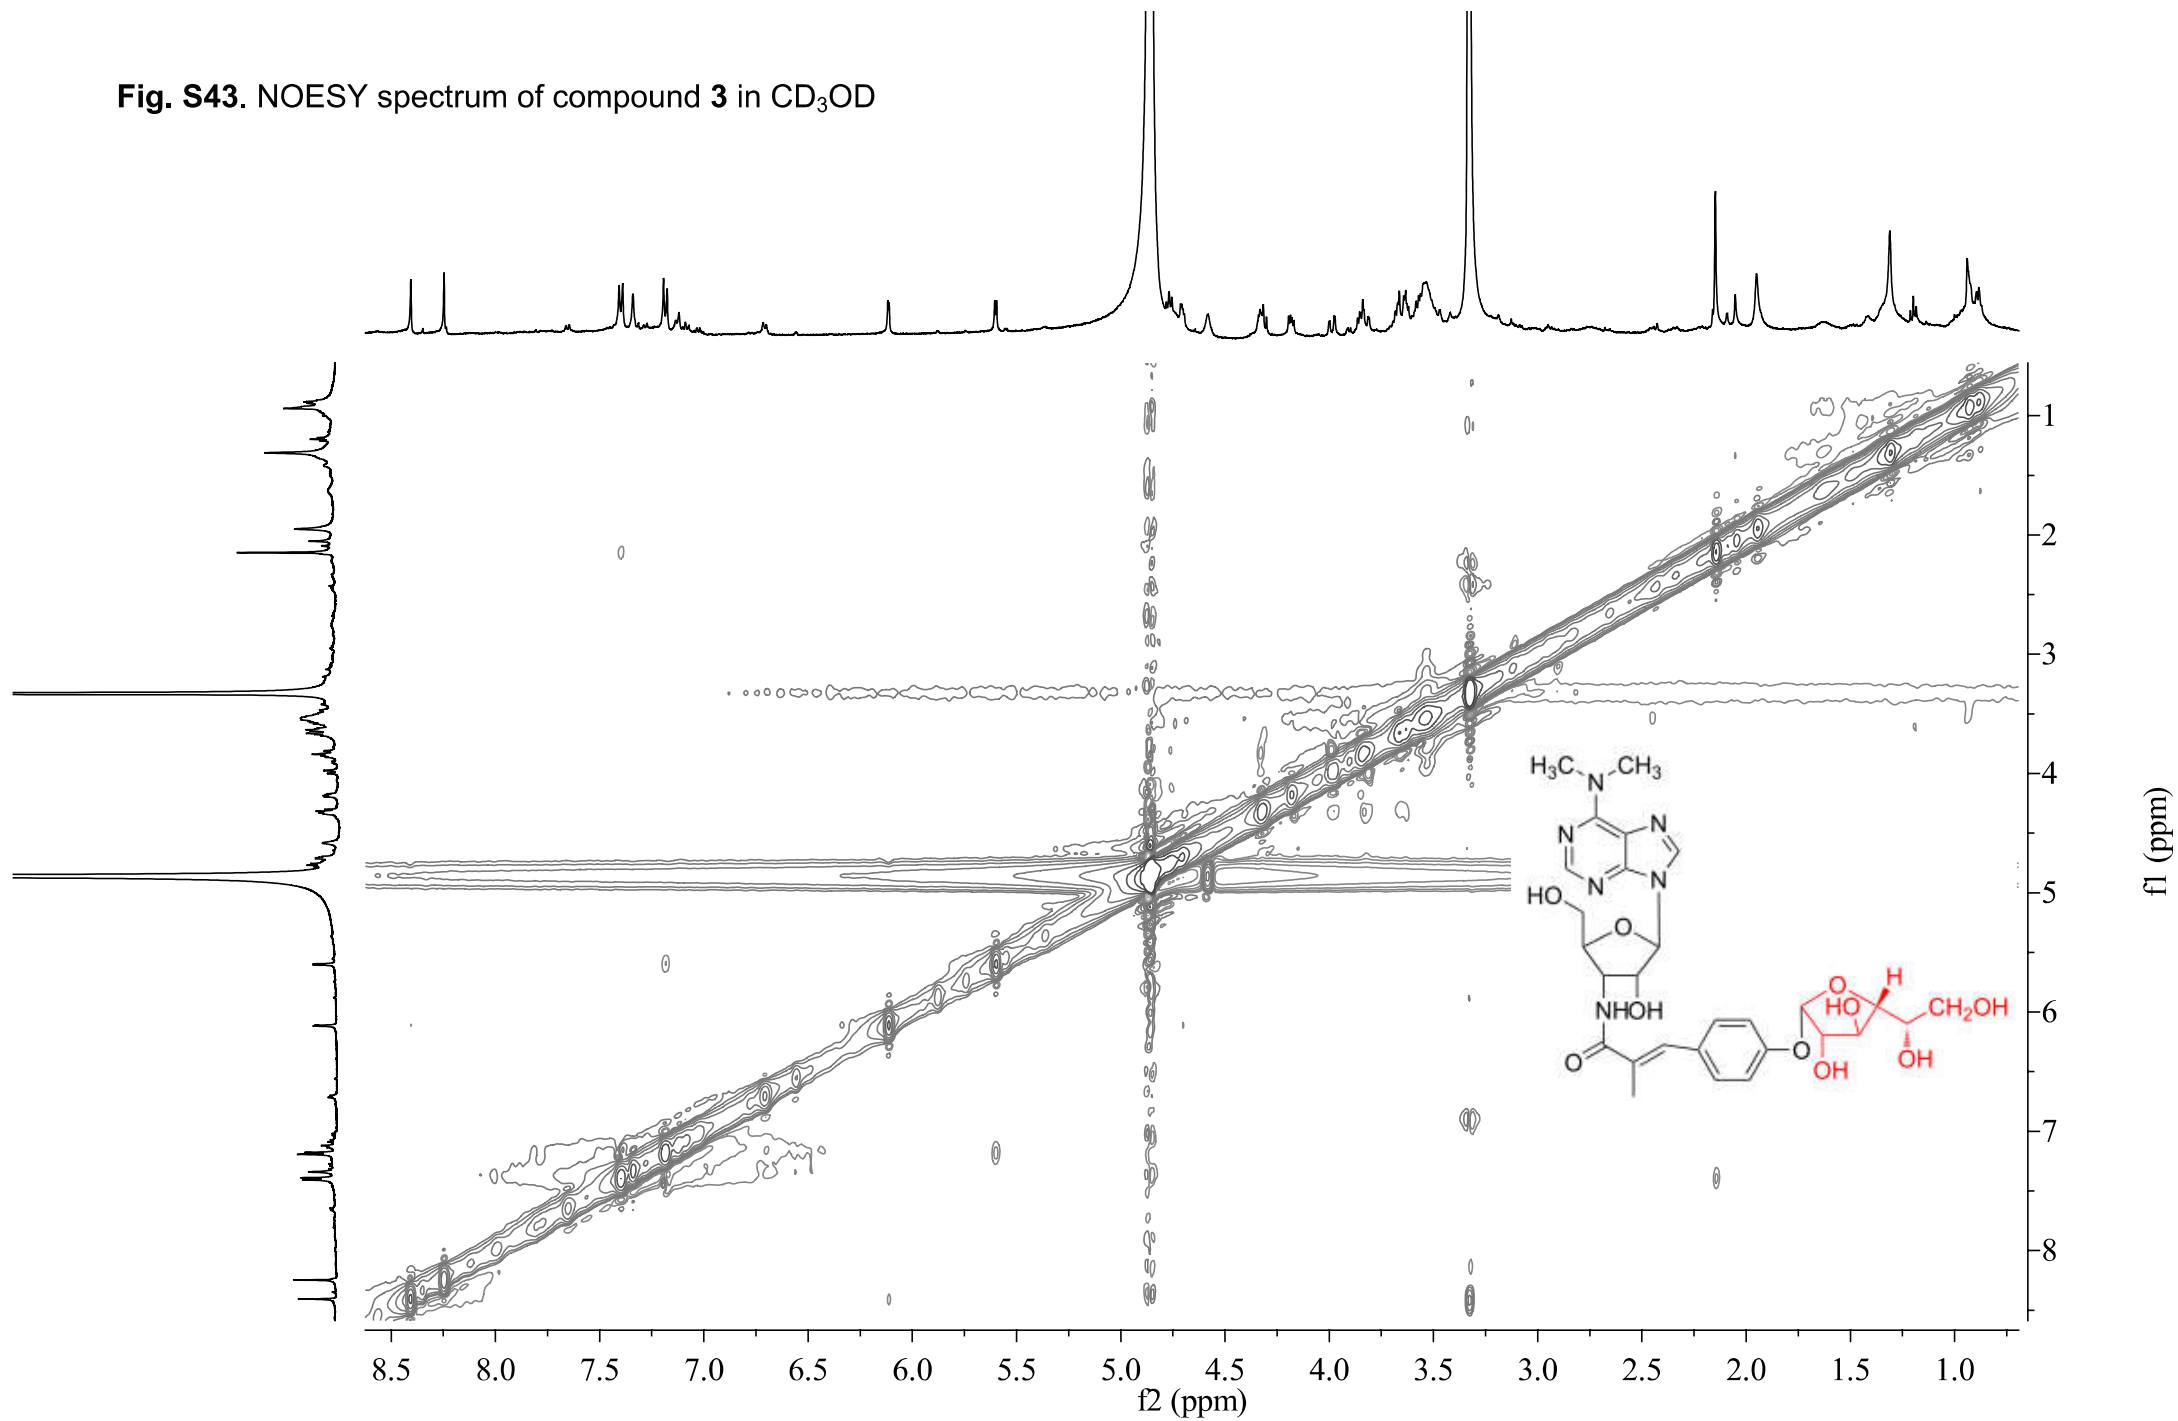

**Fig. S44.**  $^1\text{H}$  NMR (500 MHz) spectrum of compound **4** in  $\text{CD}_3\text{OD}$  and  $\text{CDCl}_3$

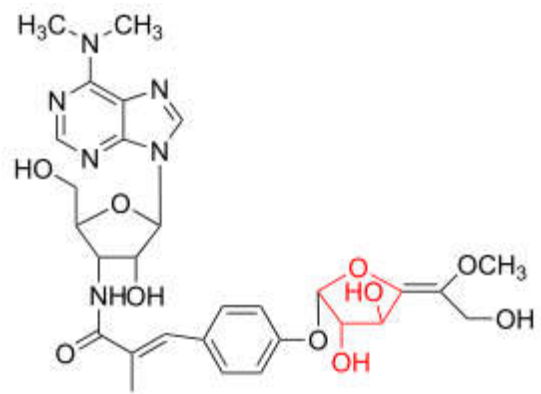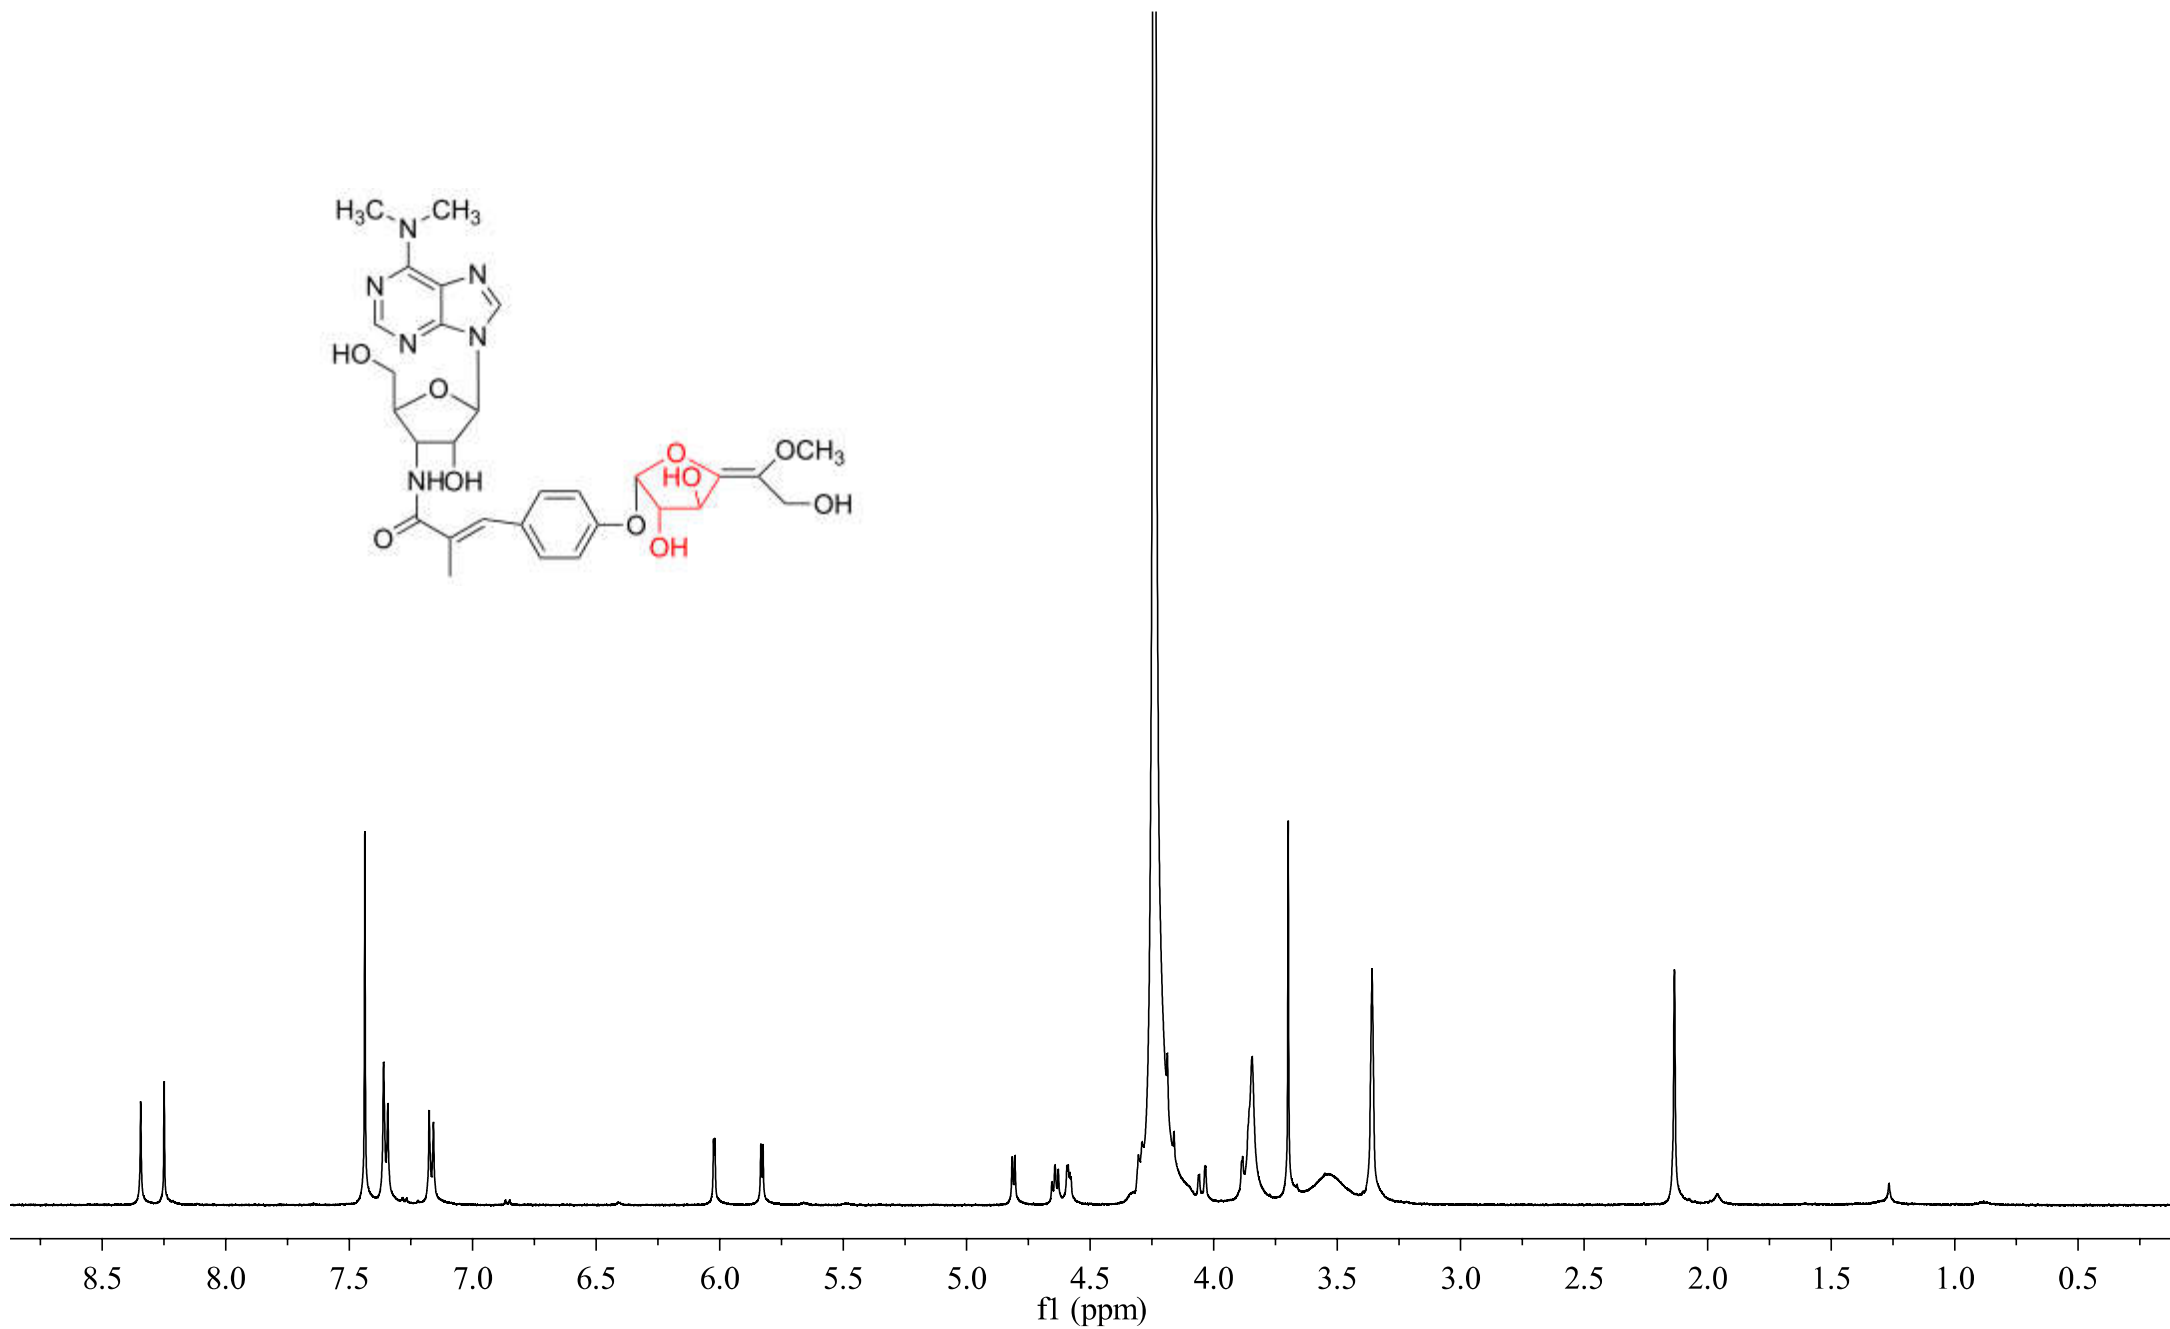

Fig. S45.  $^{13}\text{C}$  NMR (125 MHz) spectrum of compound **4** in  $\text{CD}_3\text{OD}$  and  $\text{CDCl}_3$

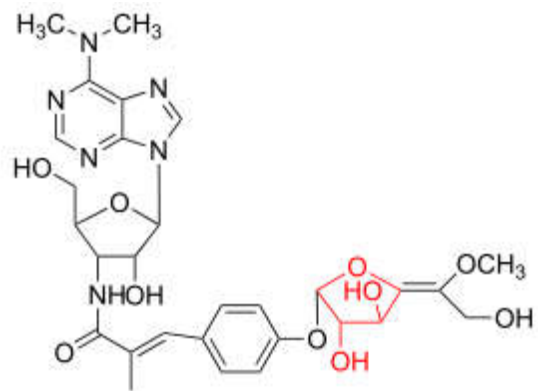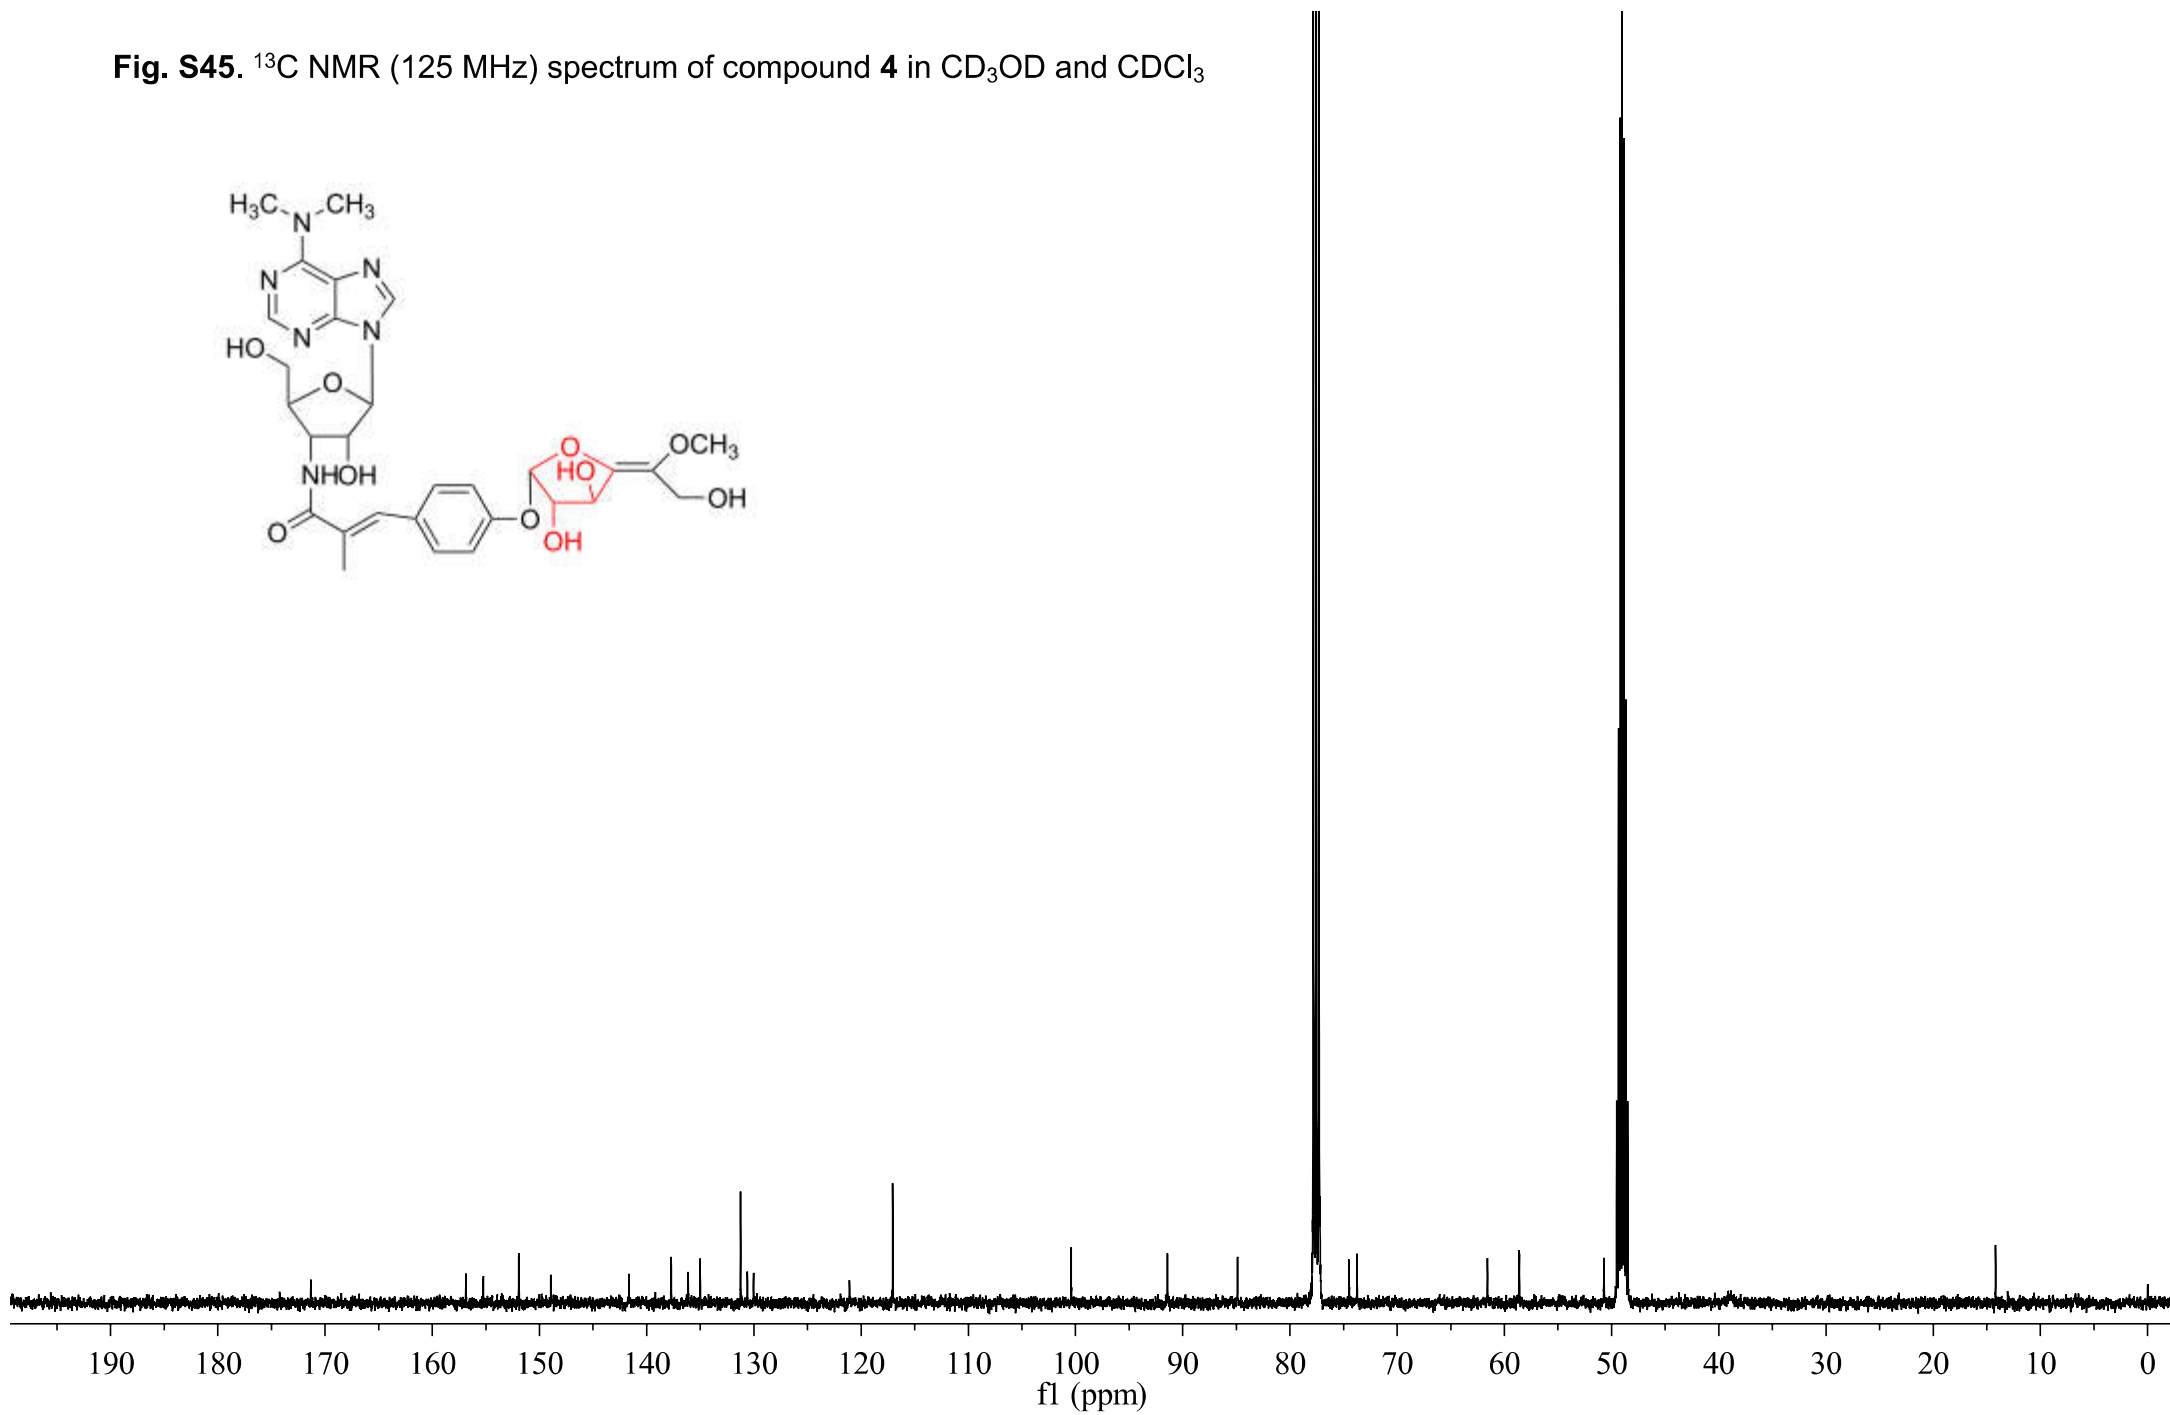

**Fig. S46.**  $^1\text{H}$  NMR (500 MHz) spectrum of compound **5** in  $\text{CD}_3\text{OD}$

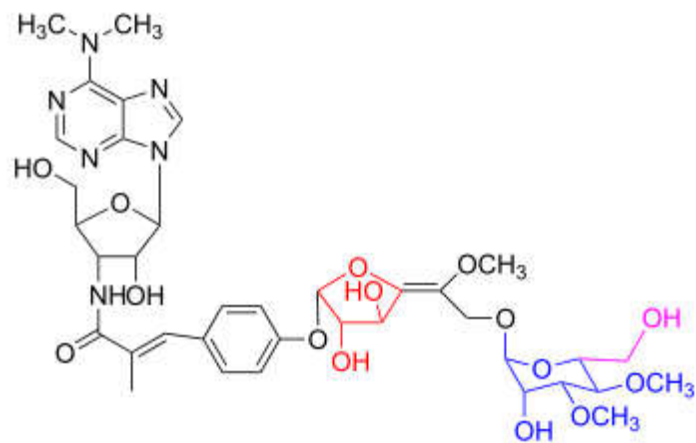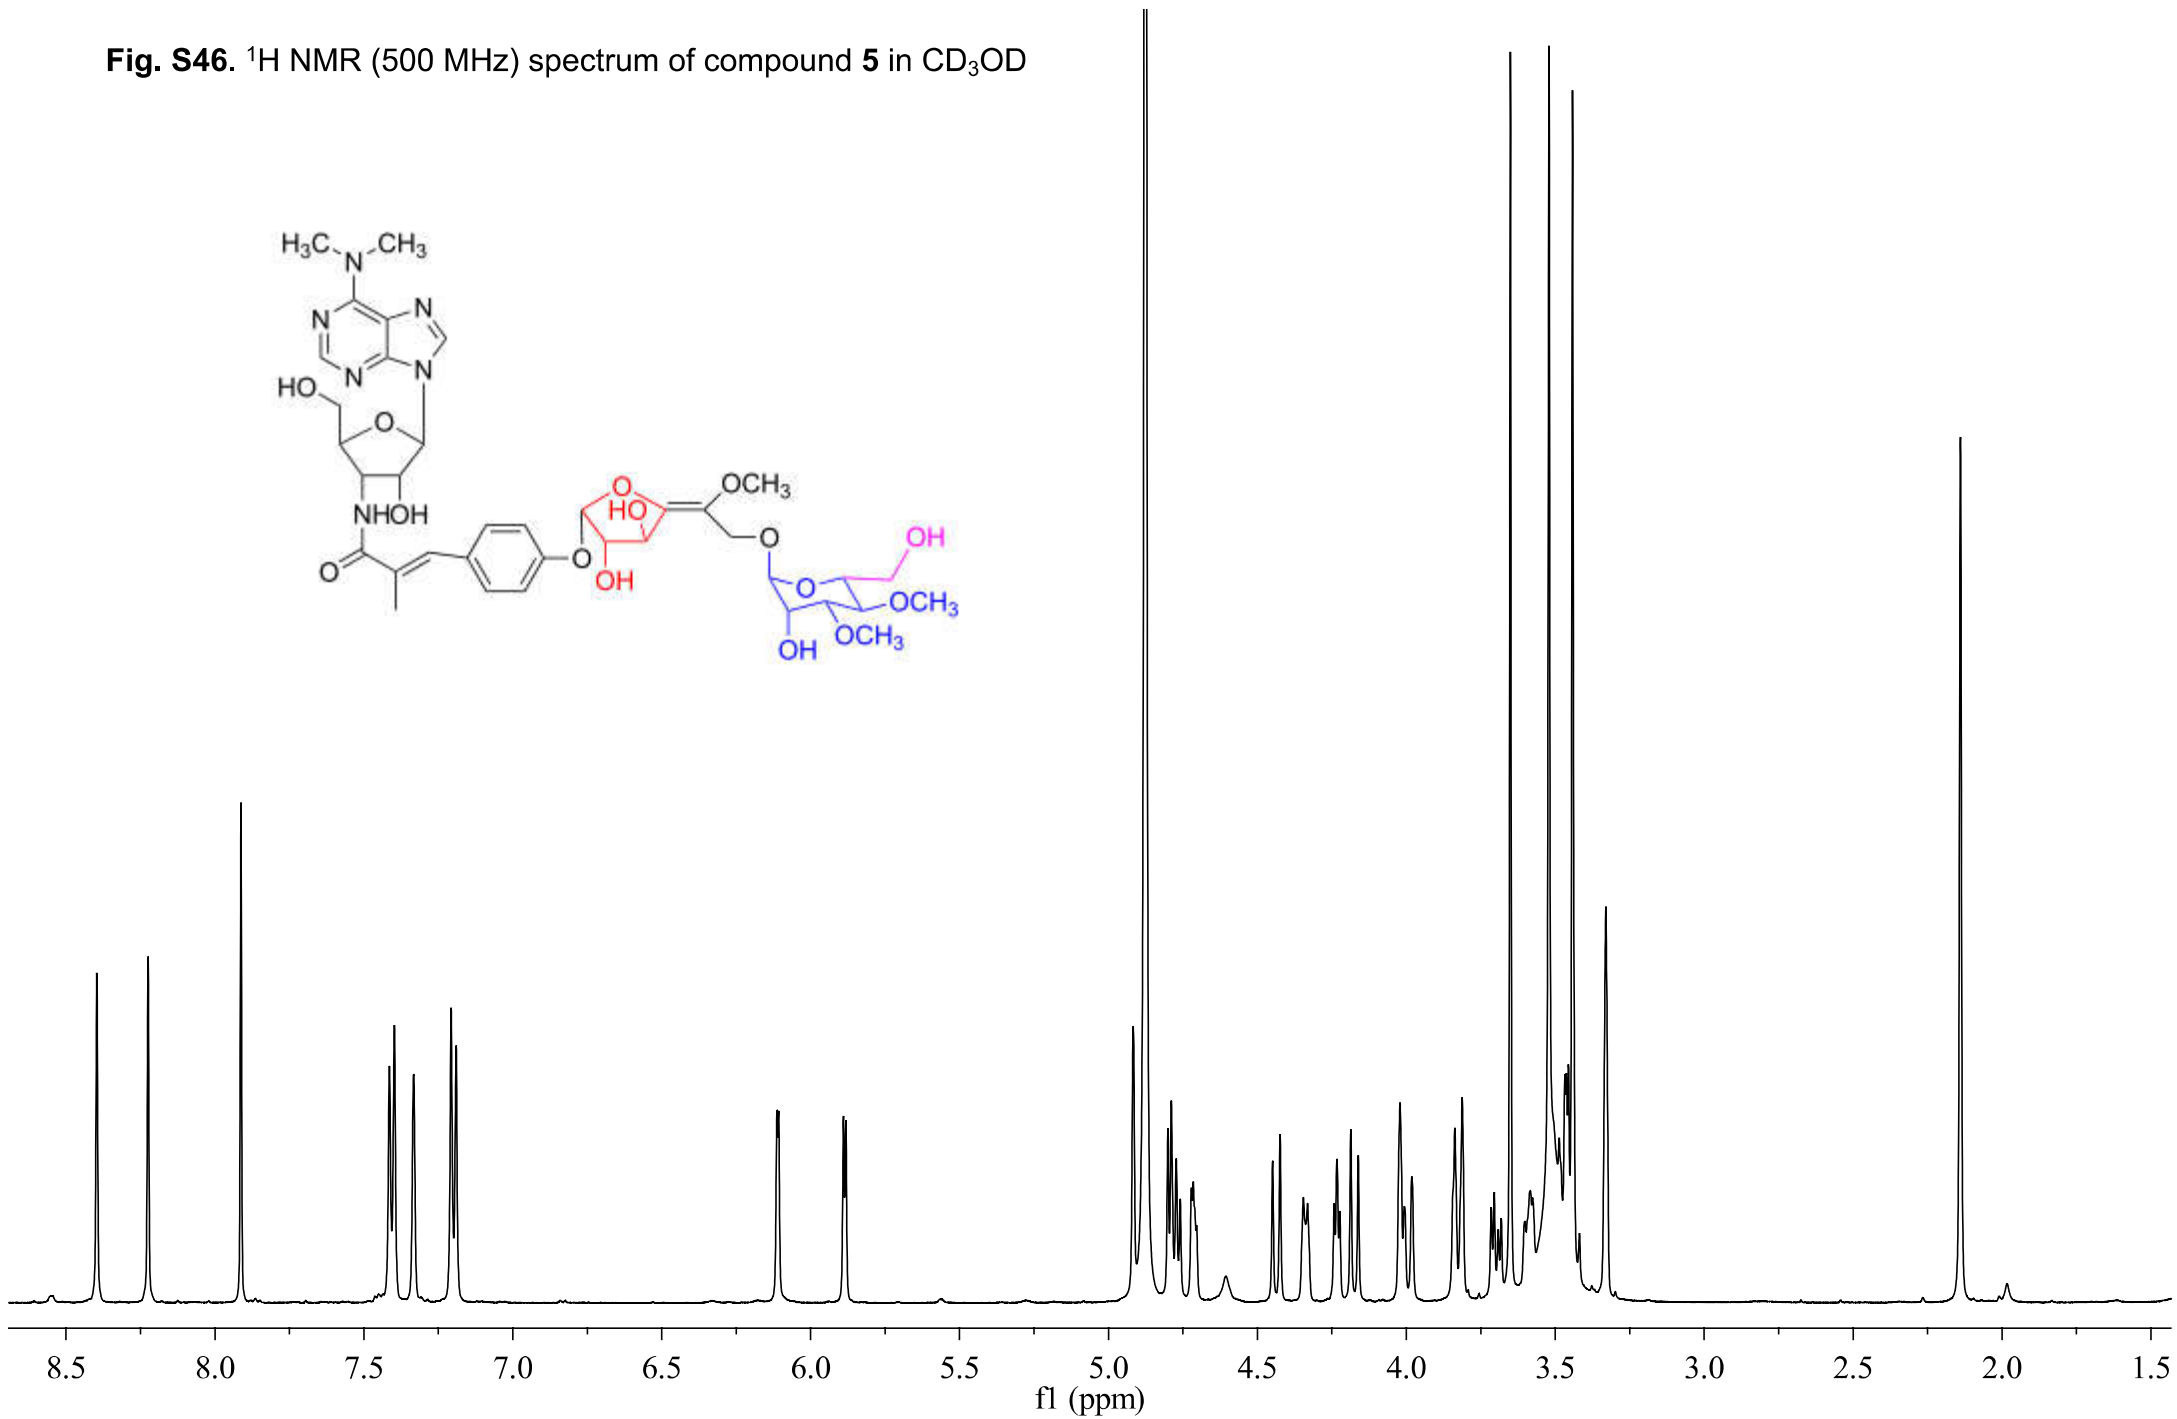

**Fig. S47.**  $^{13}\text{C}$  NMR (125 MHz) spectrum of compound **5** in  $\text{CD}_3\text{OD}$

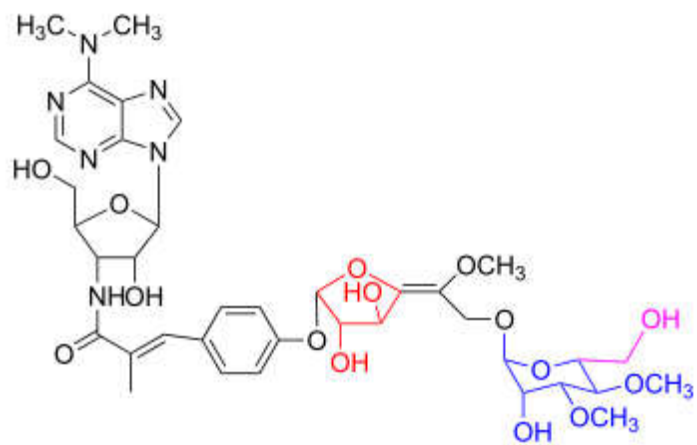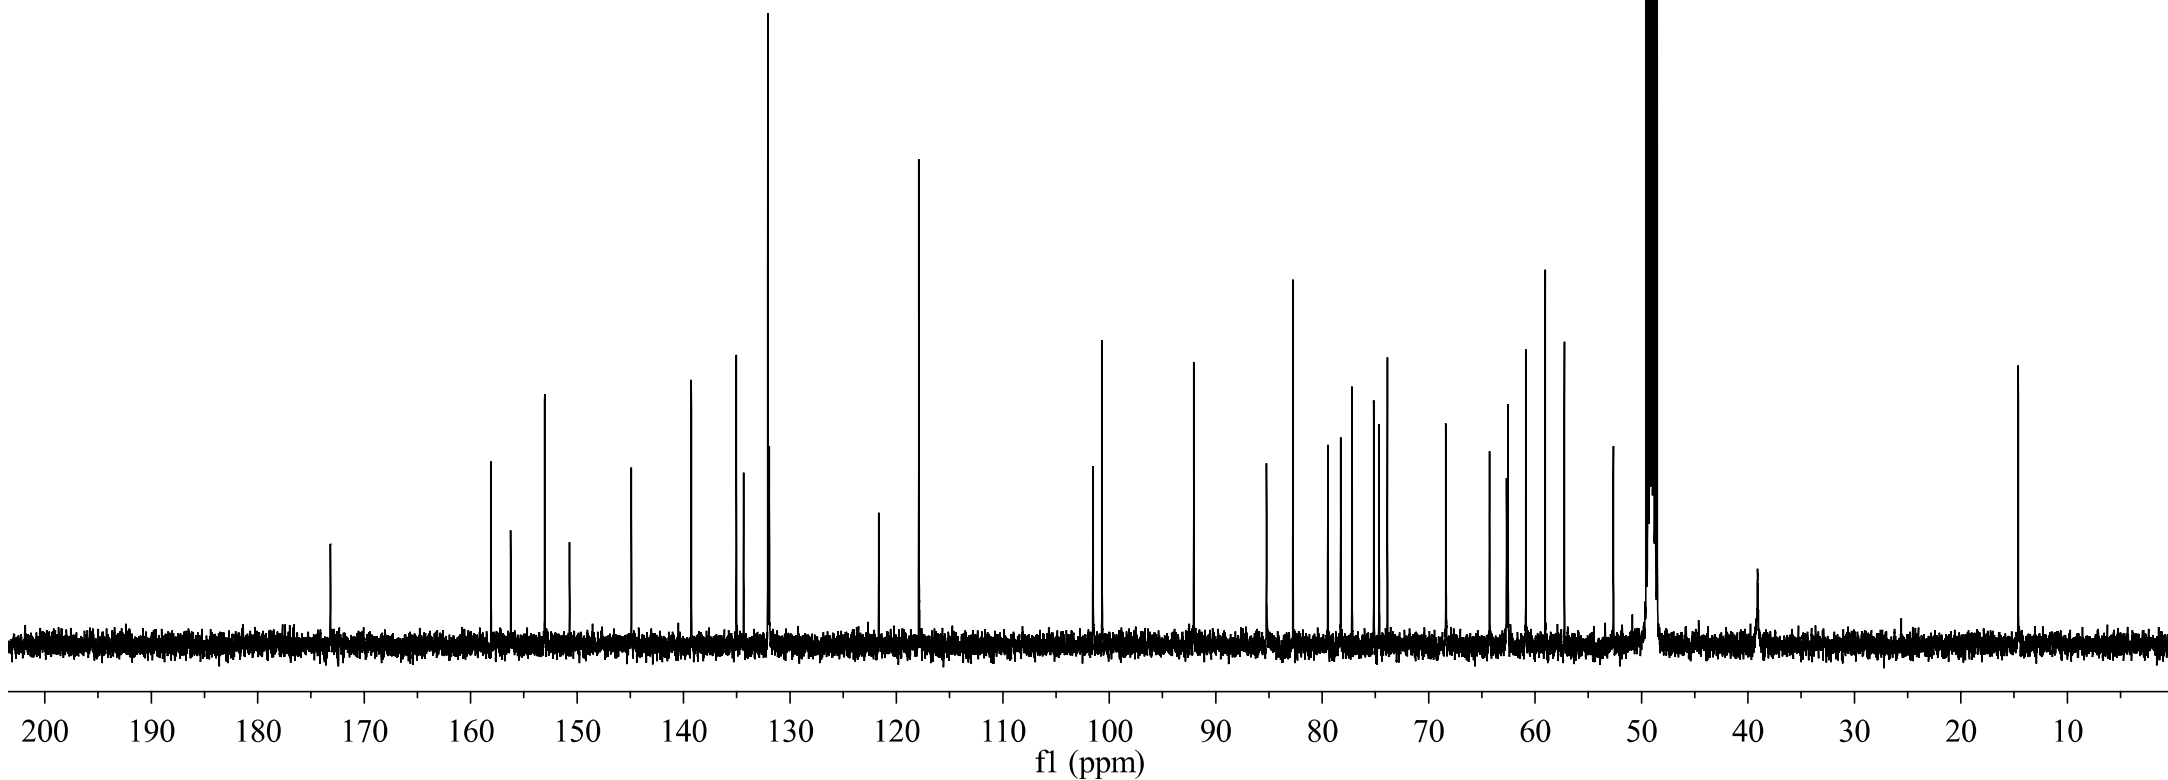

Fig. S48. HSQC spectrum of compound 5 in CD<sub>3</sub>OD

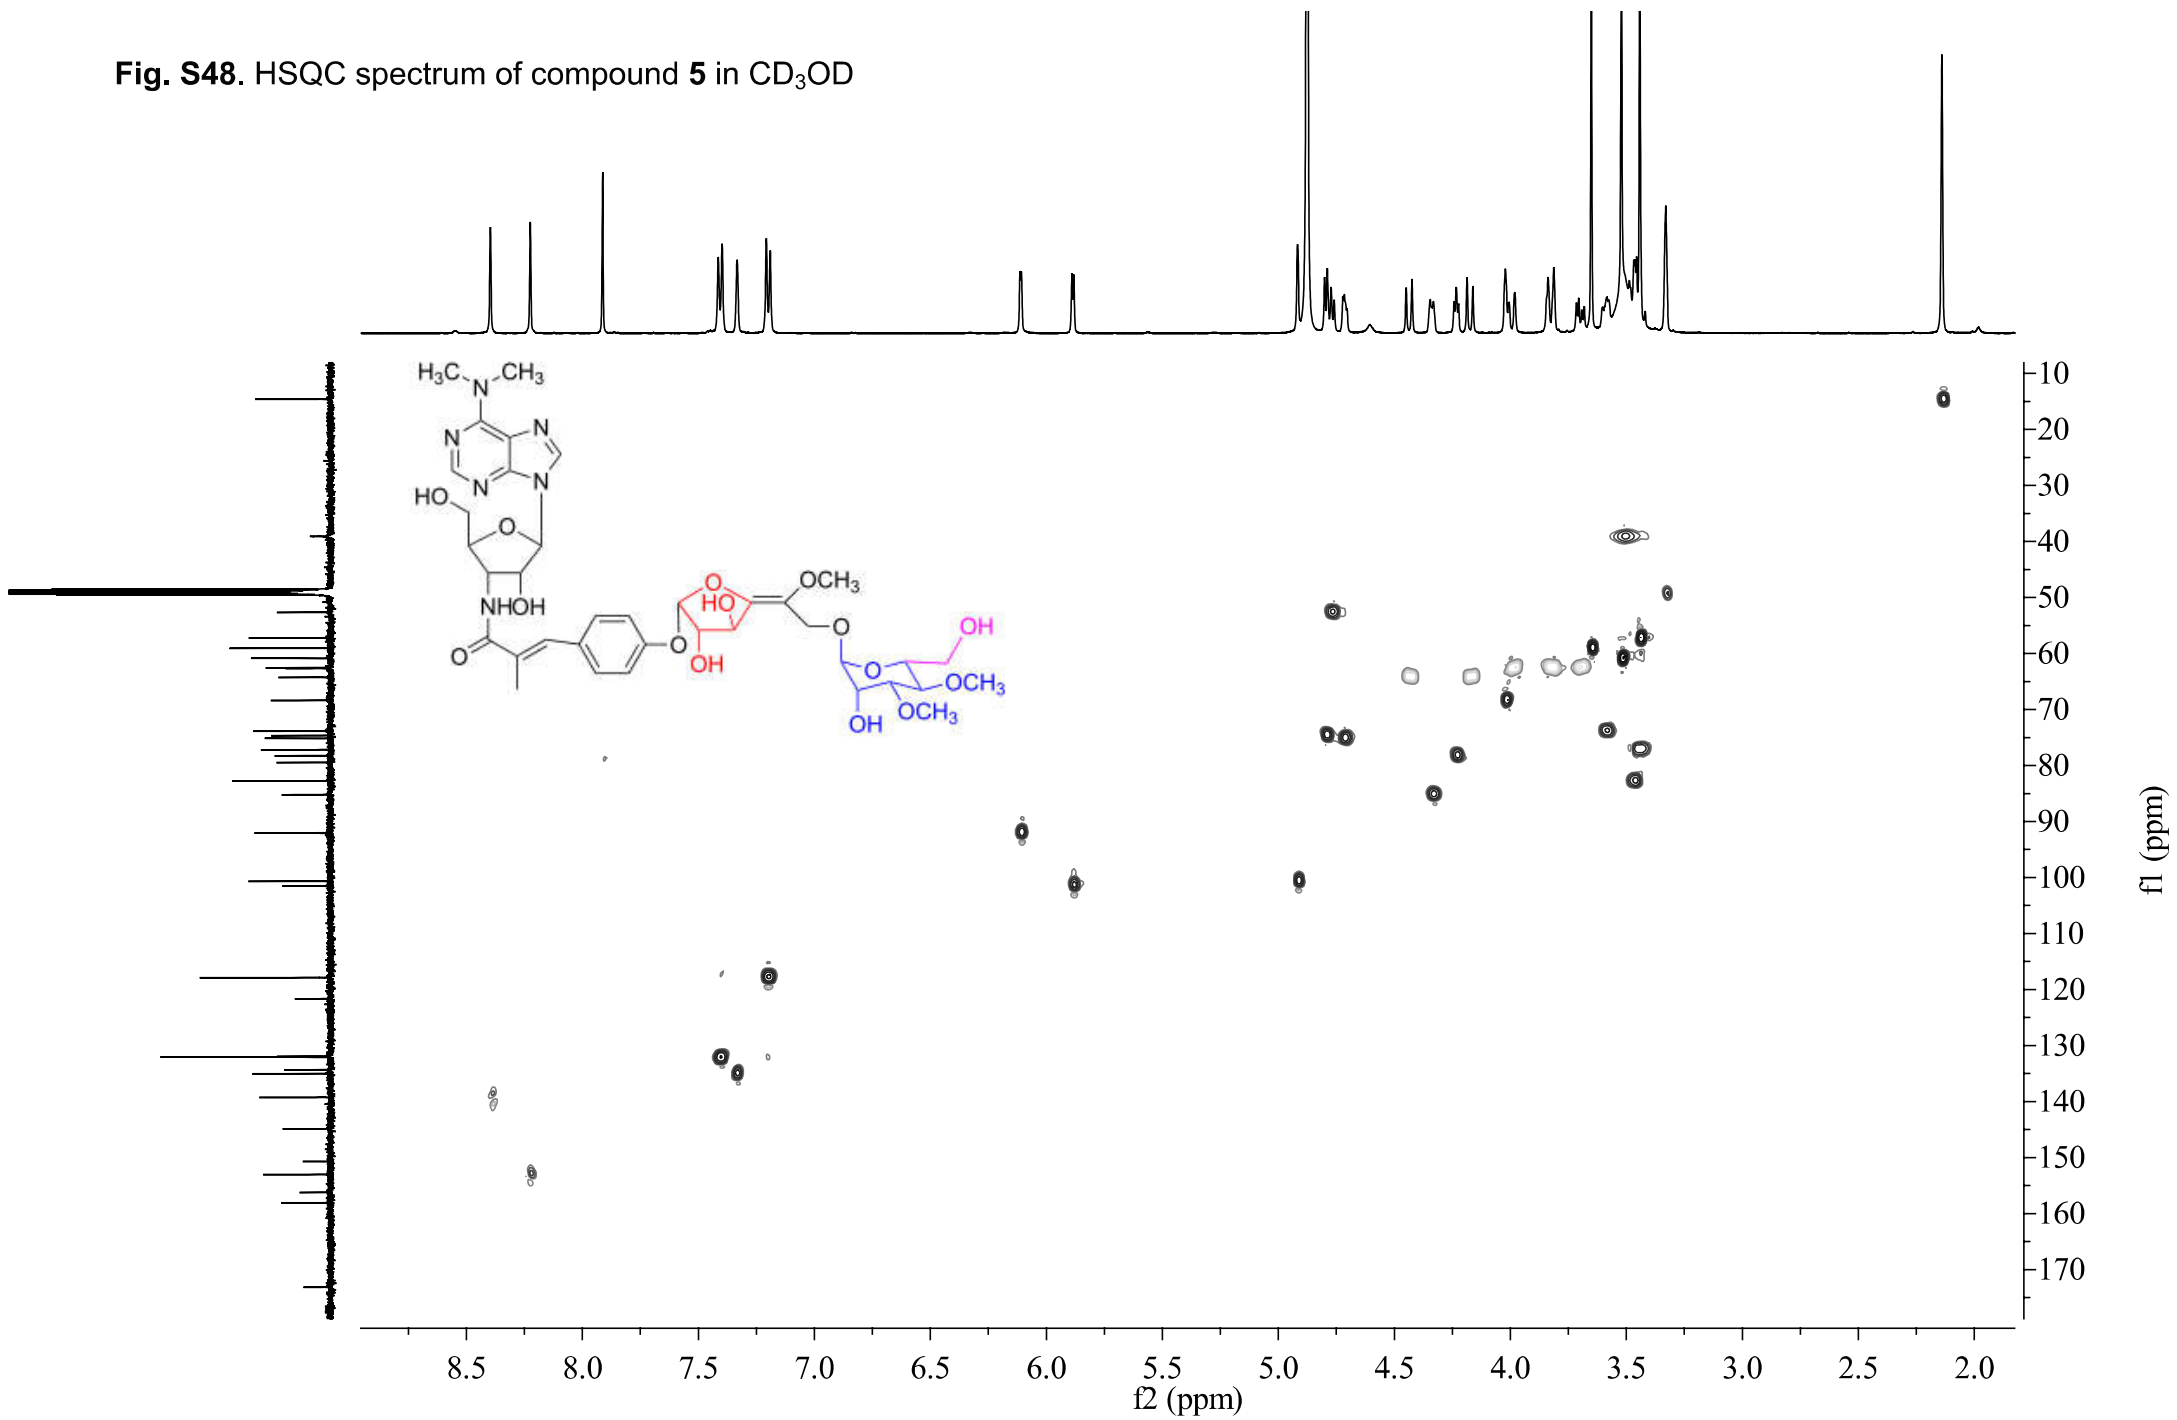

Fig. S49.  $^1\text{H}$ - $^1\text{H}$  COSY spectrum of compound **5** in  $\text{CD}_3\text{OD}$

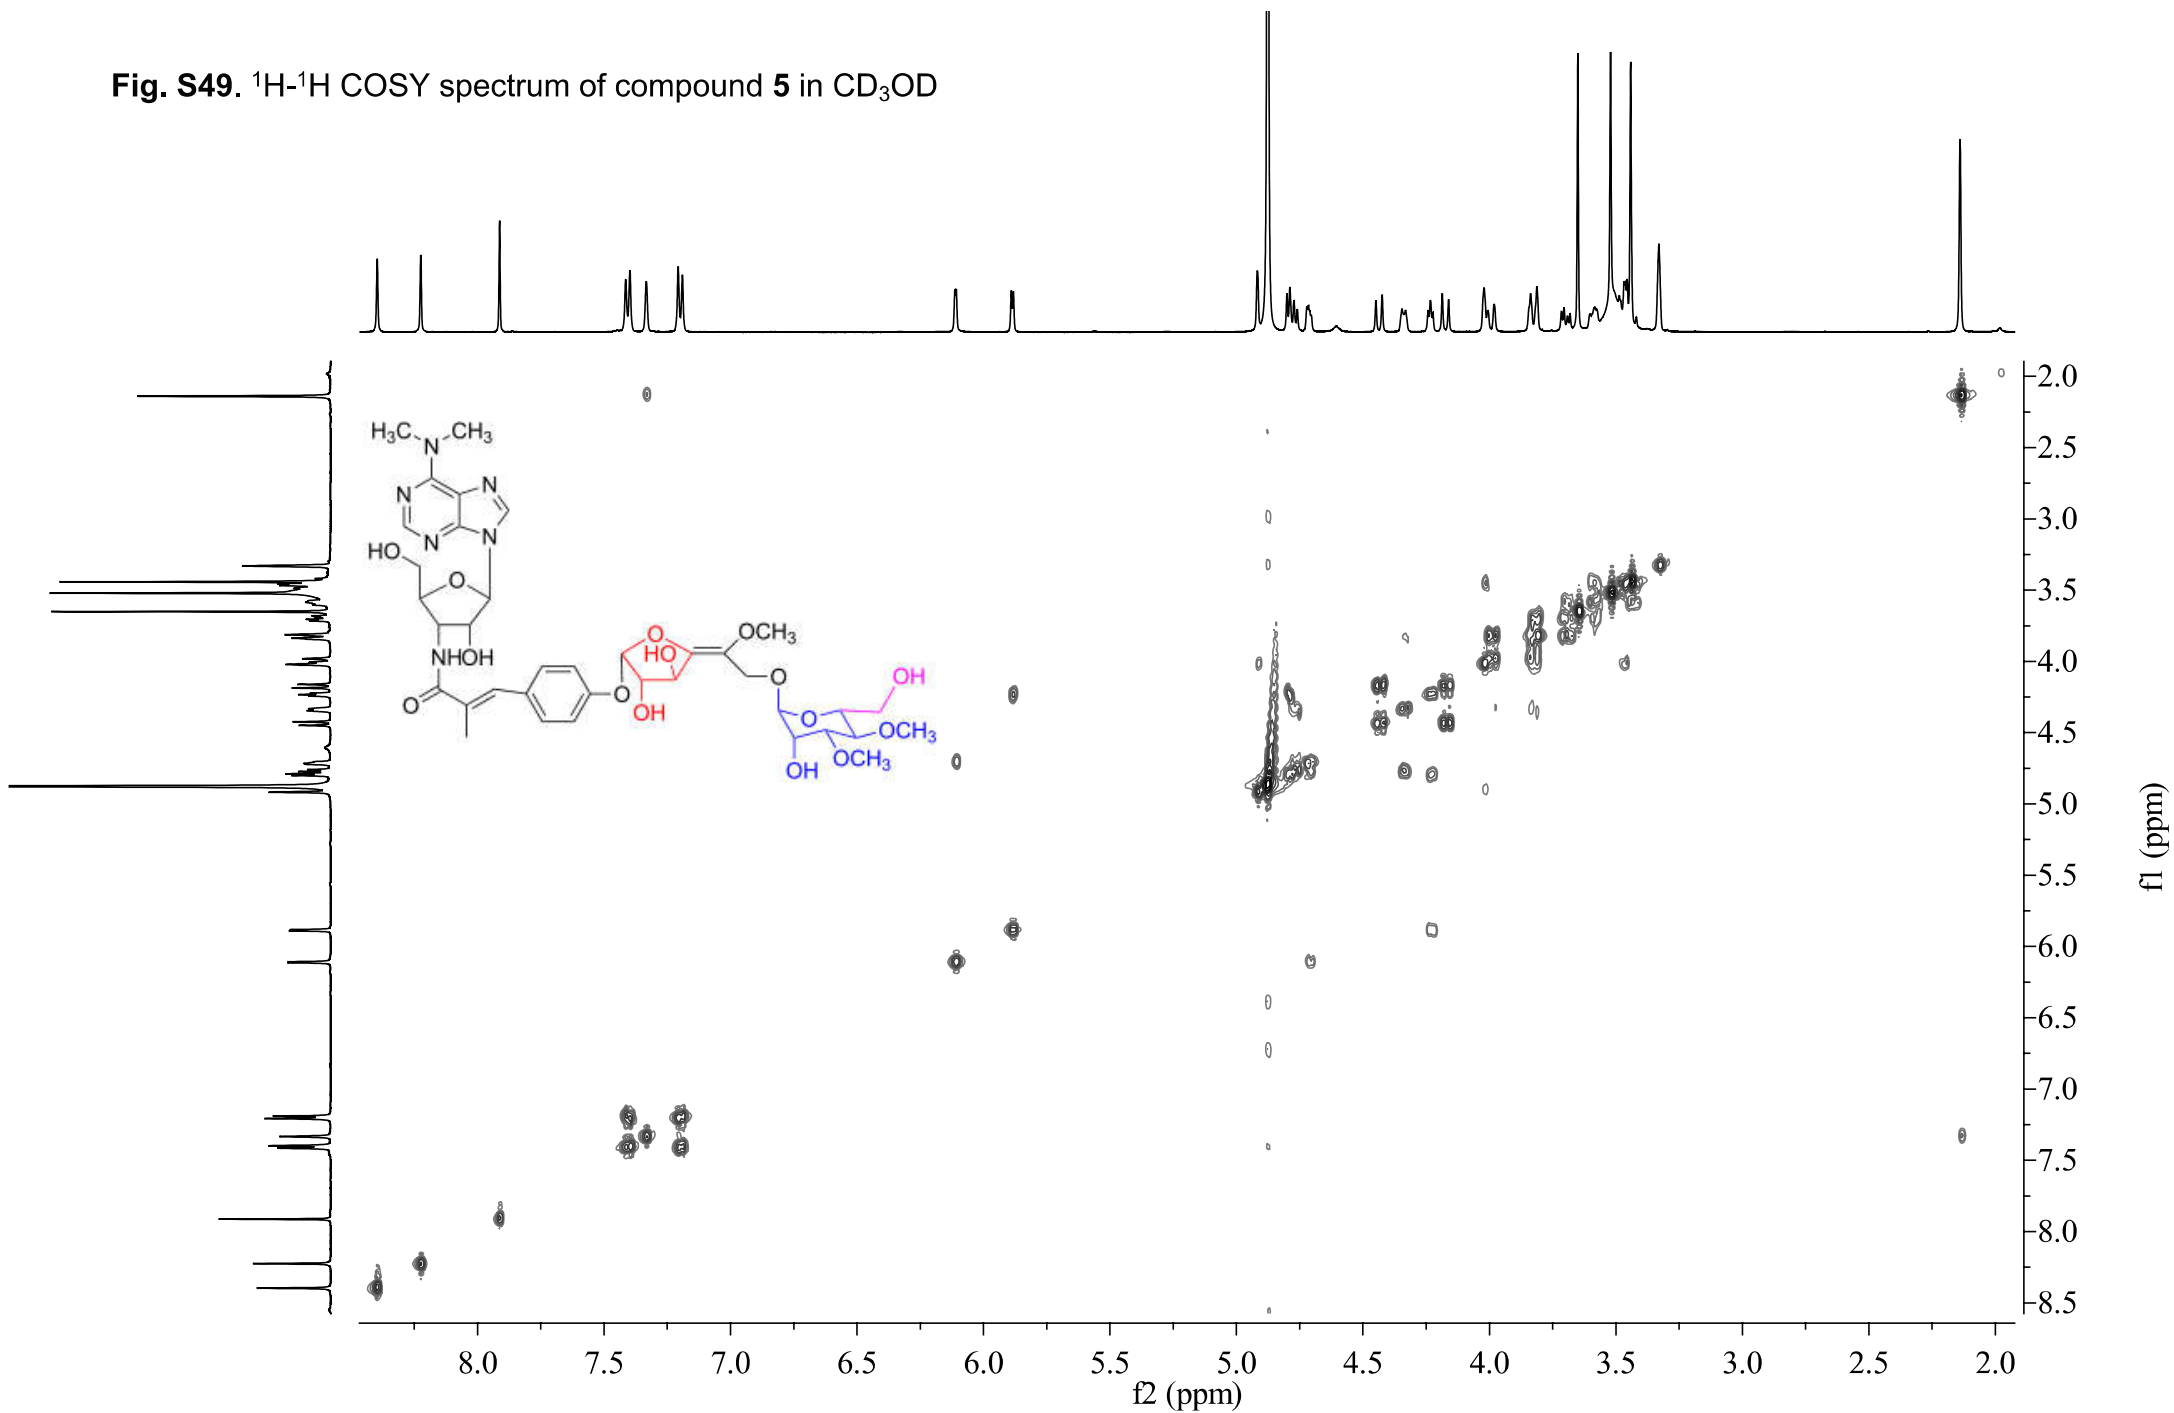

Fig. S50. HMBC spectrum of compound **5** in CD<sub>3</sub>OD

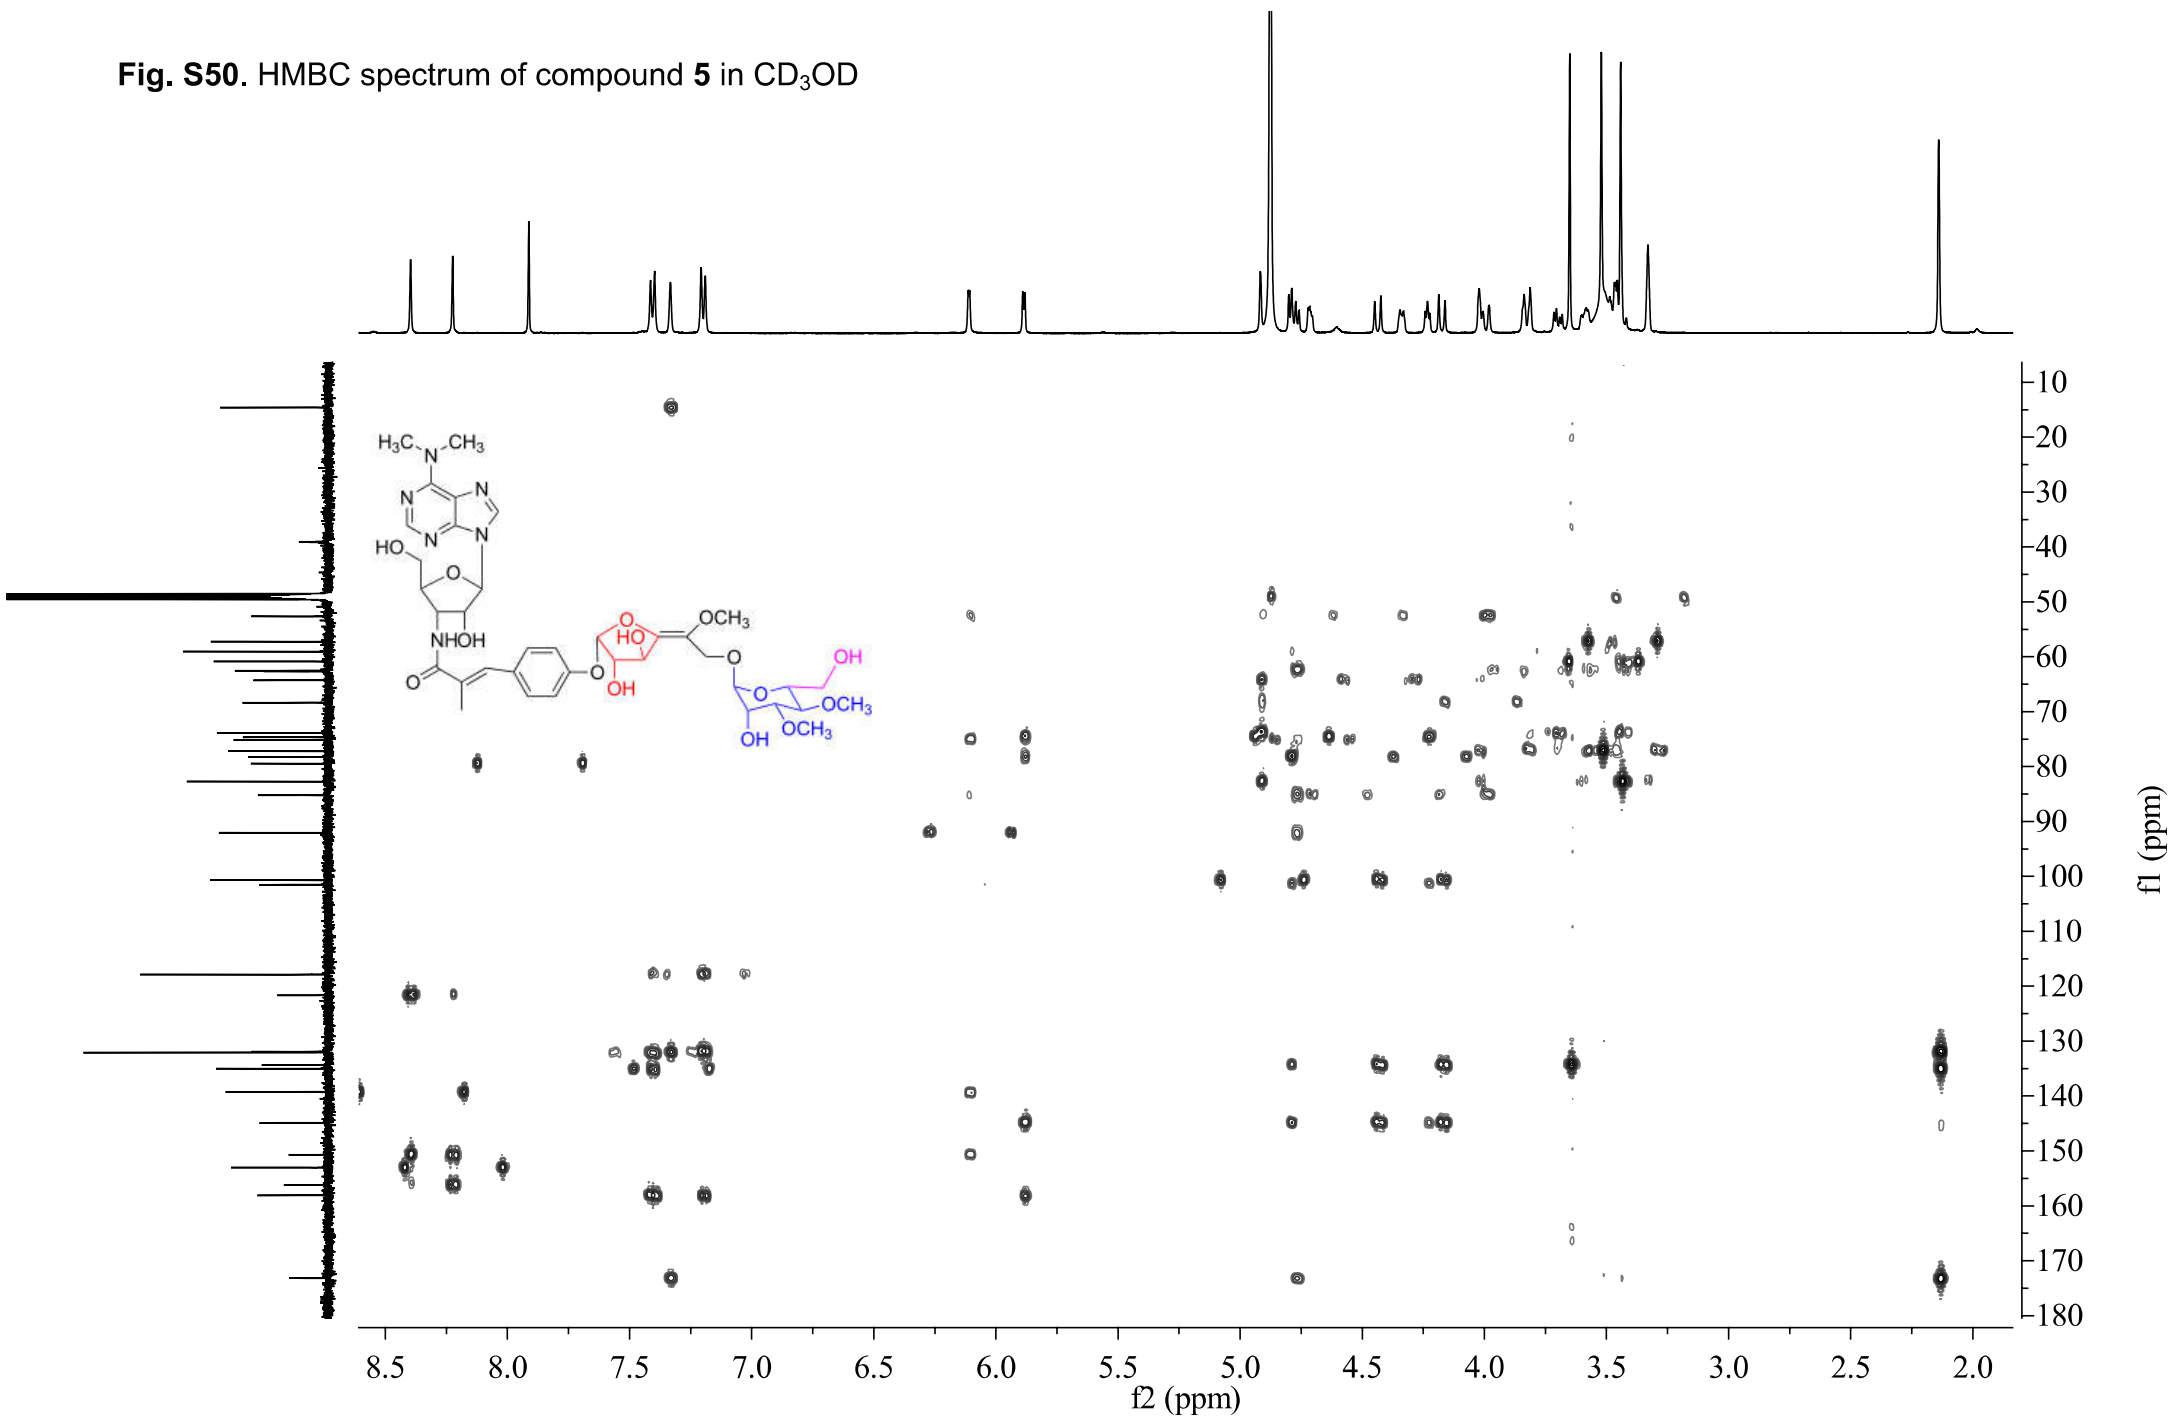



Fig. S51.  $^1\text{H}$  NMR (500 MHz) spectrum of compound **6** in  $\text{CD}_3\text{OD}$

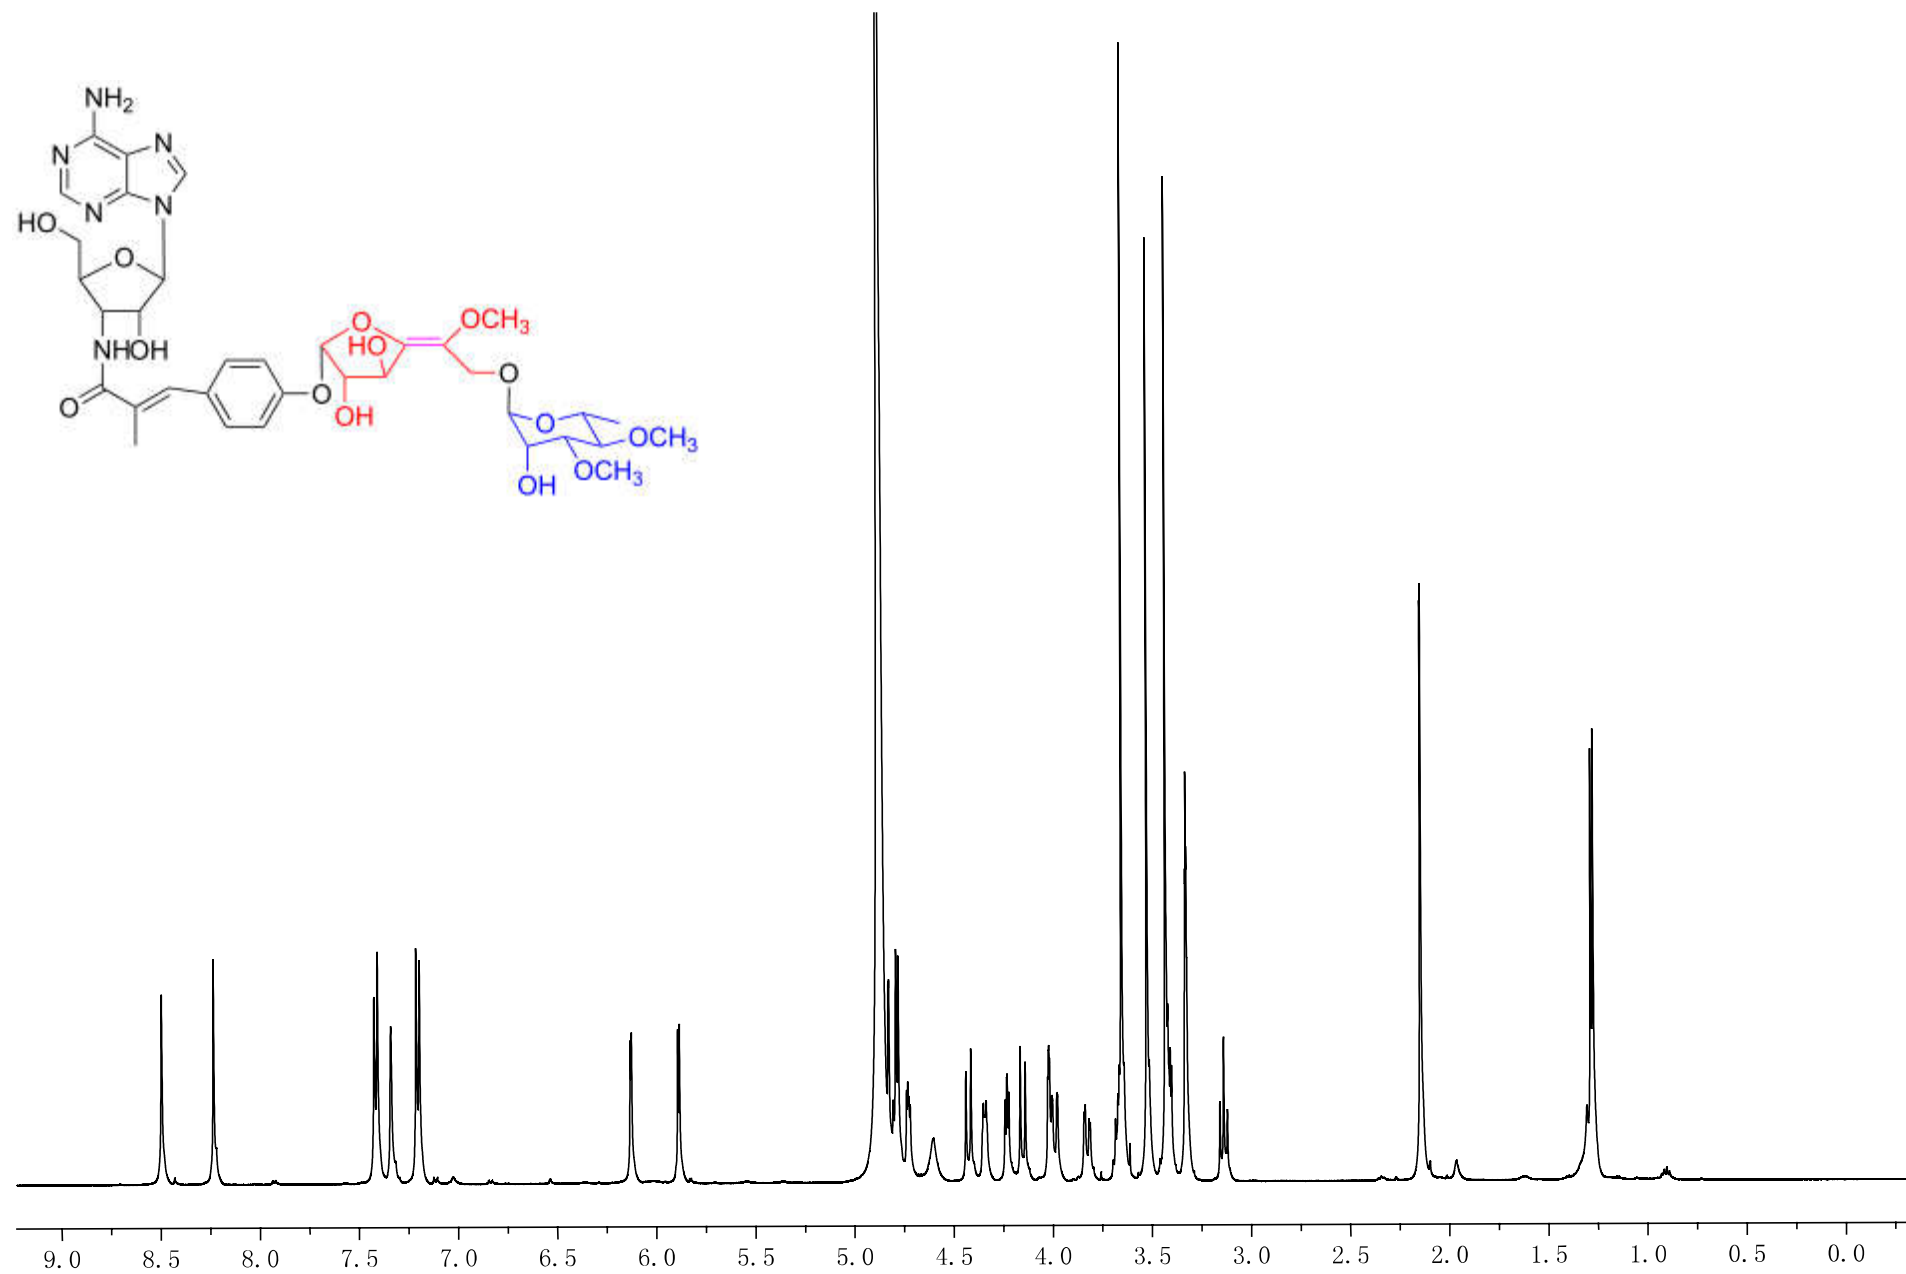

Fig. S52.  $^{13}\text{C}$  NMR (125 MHz) spectrum of compound **6** in  $\text{CD}_3\text{OD}$

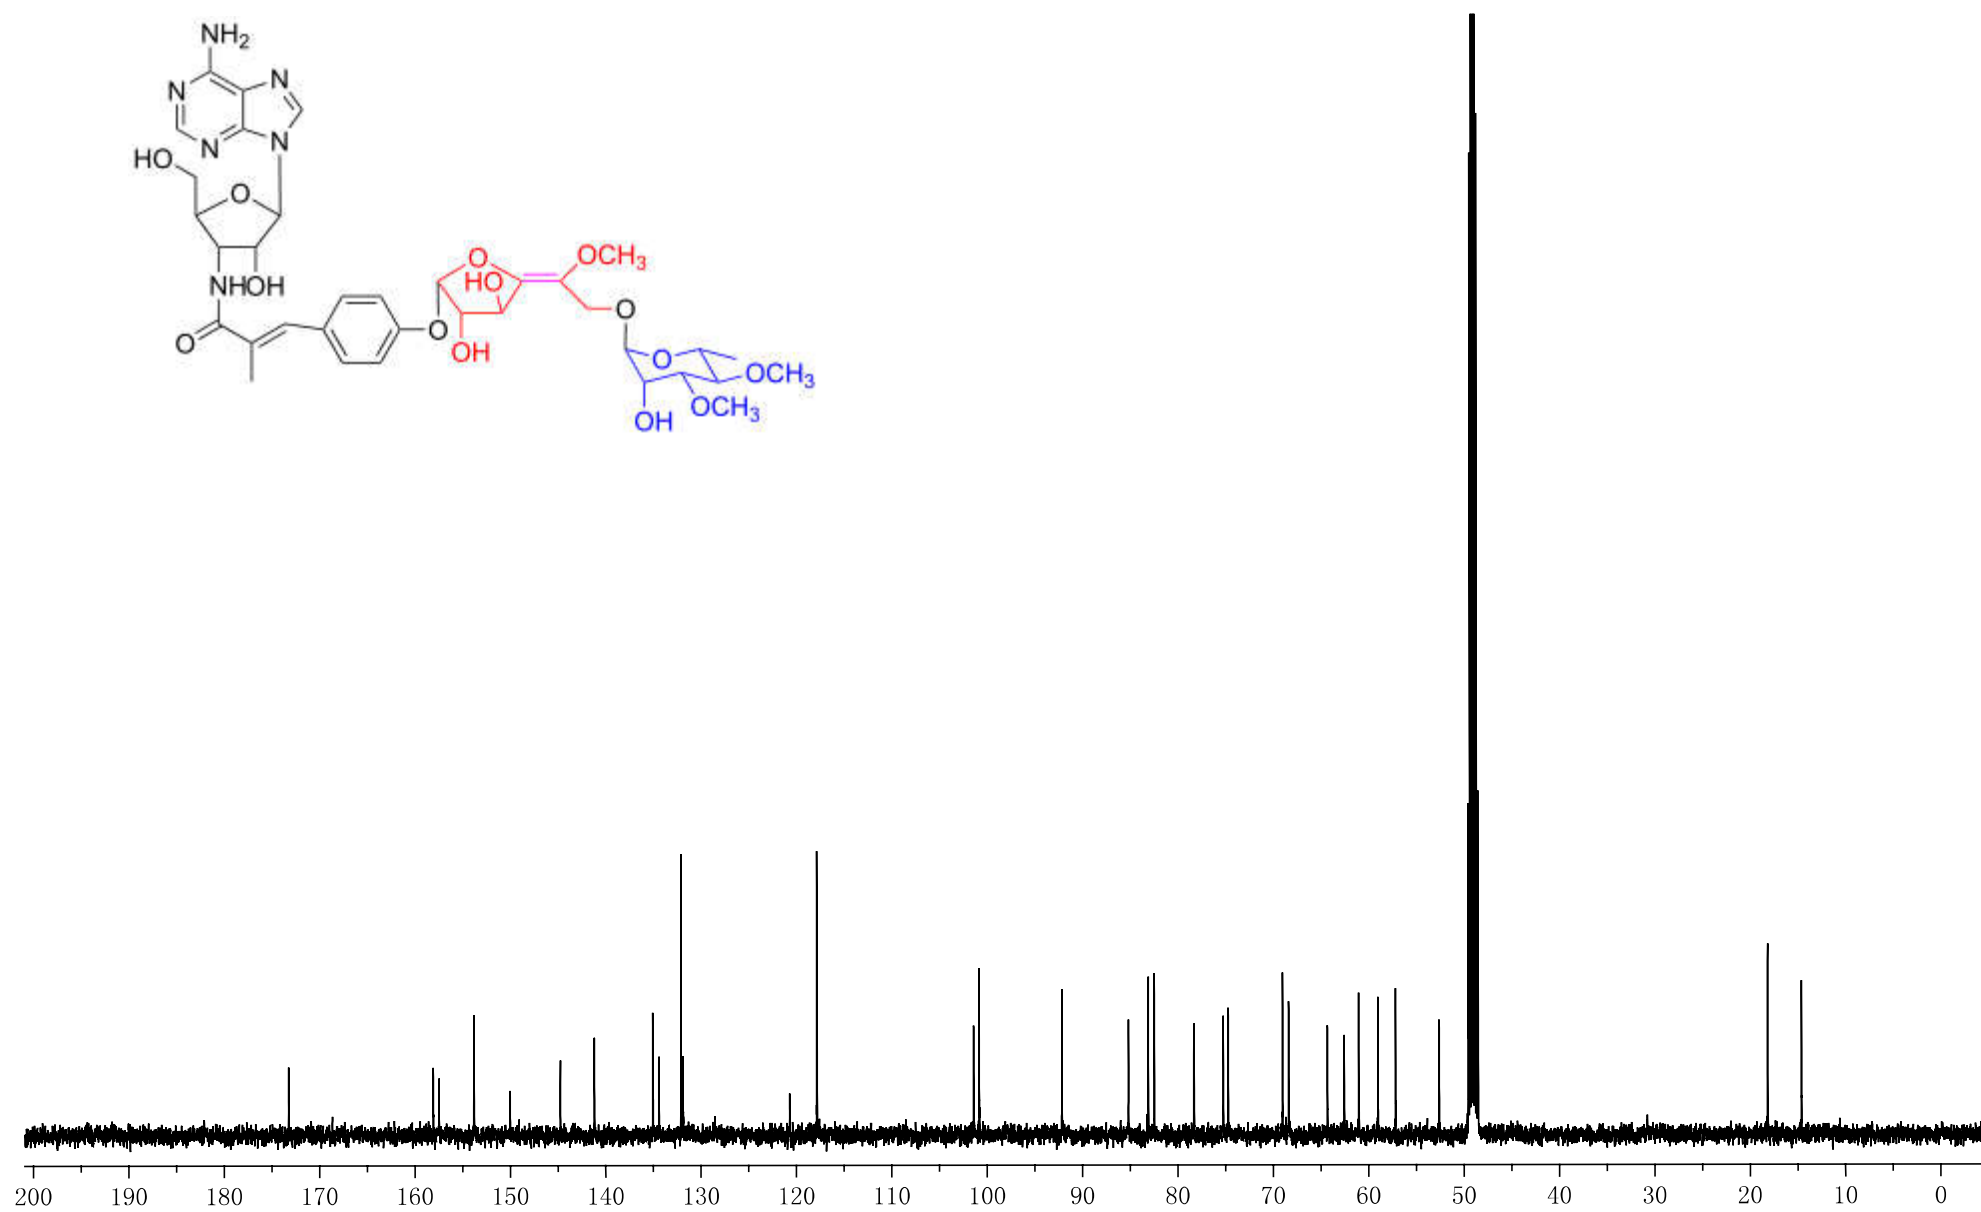

Fig. S53. HSQC spectrum of compound **6** in CD<sub>3</sub>OD

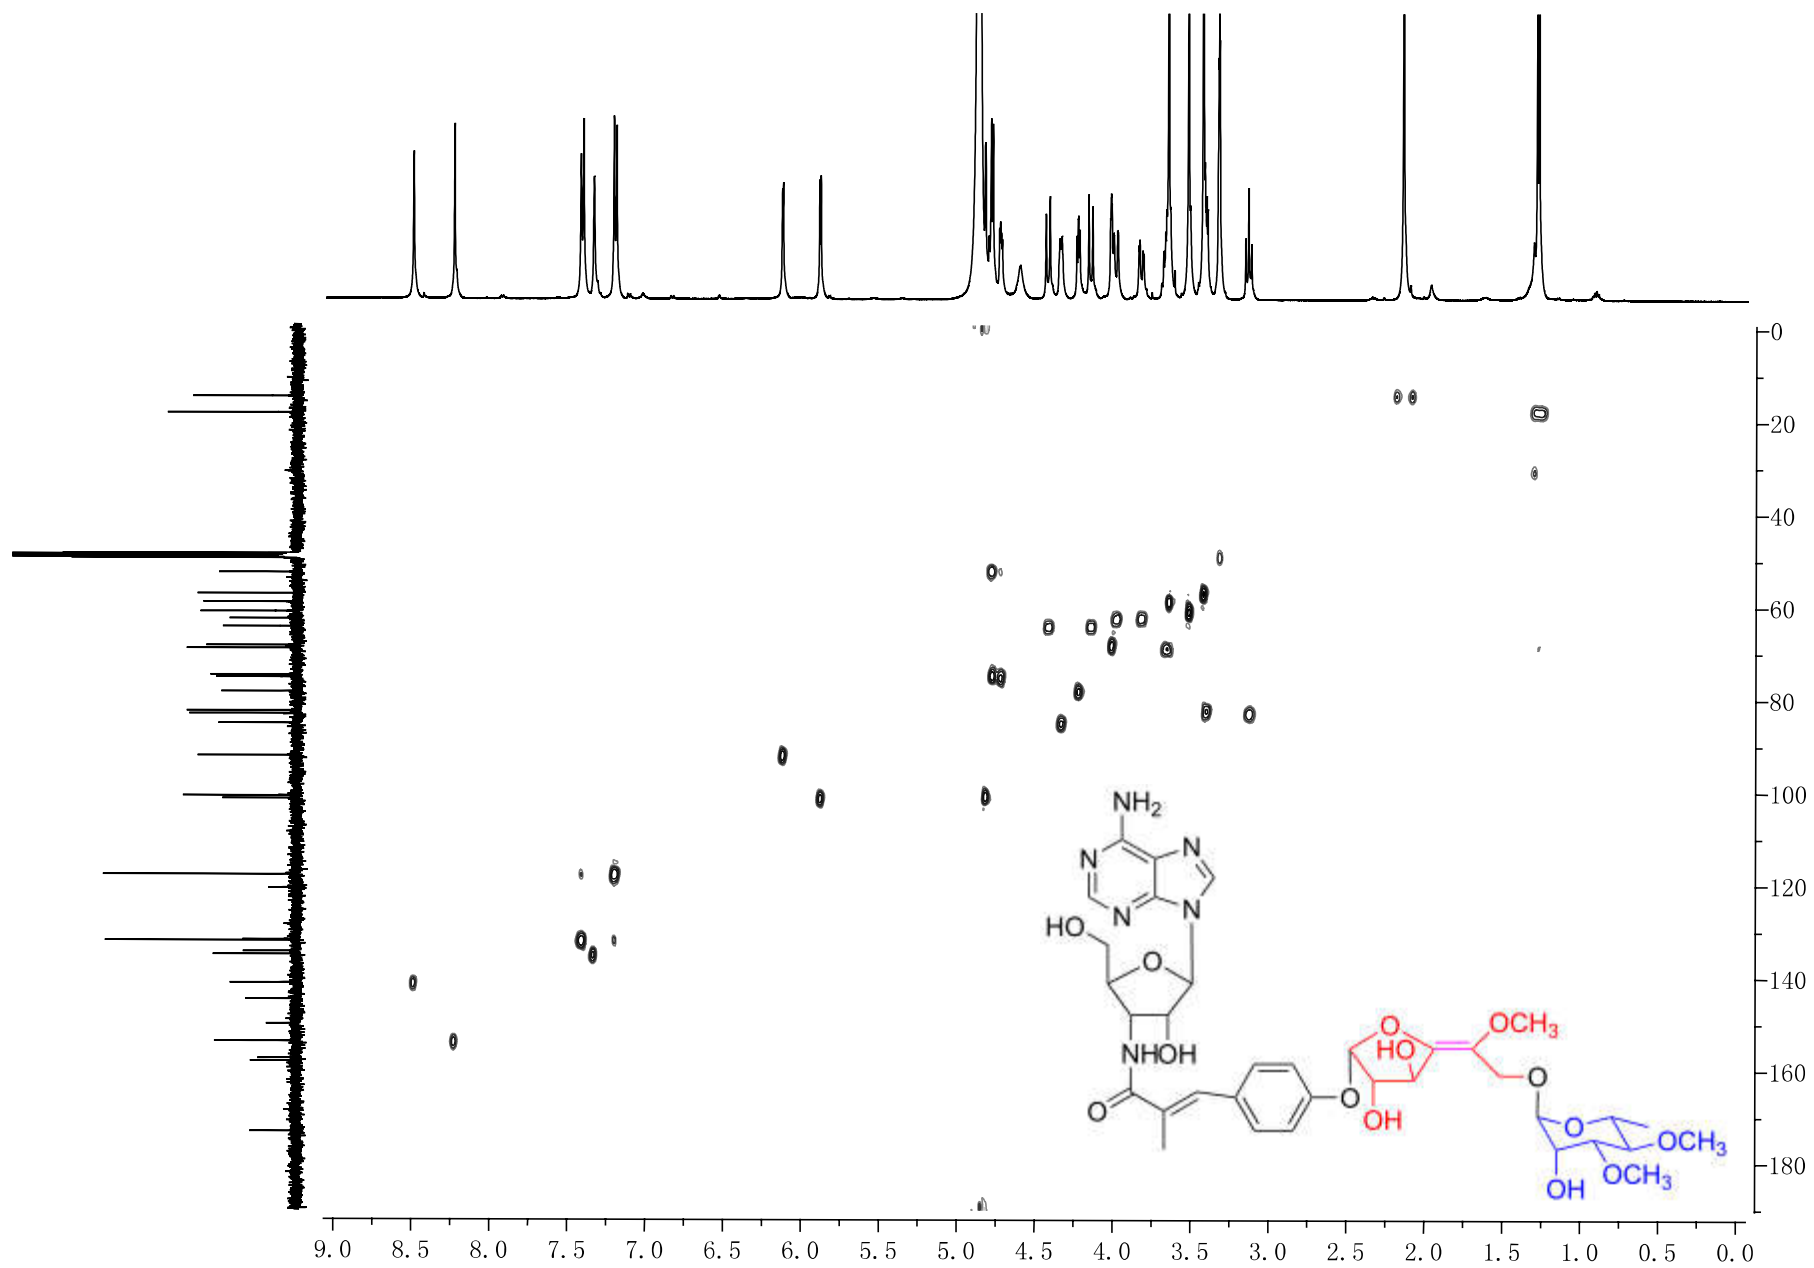

**Fig. S54.**  $^1\text{H}$ - $^1\text{H}$  COSY spectrum of compound **6** in  $\text{CD}_3\text{OD}$

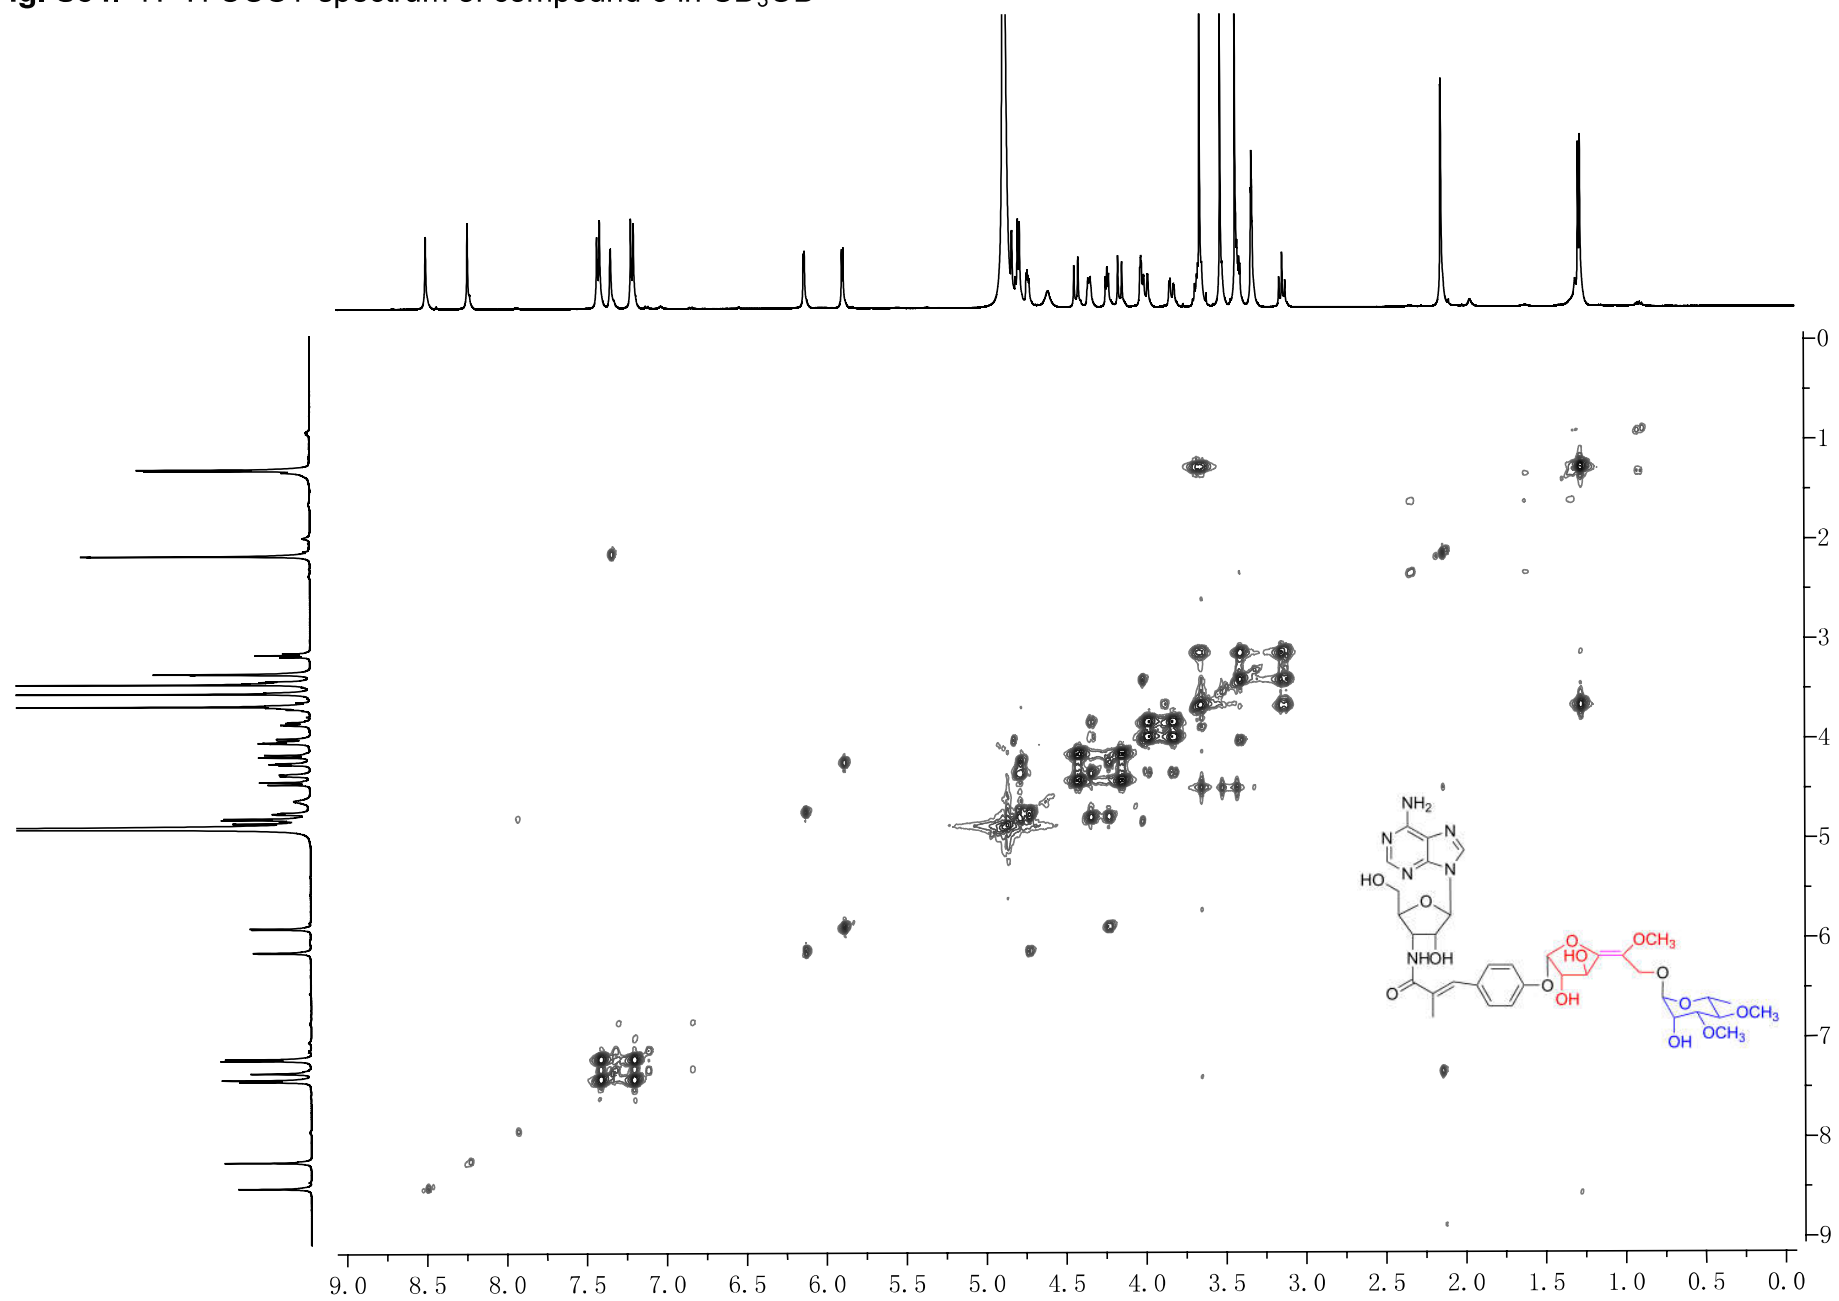

Fig. S55. HMBC spectrum of compound **6** in CD<sub>3</sub>OD

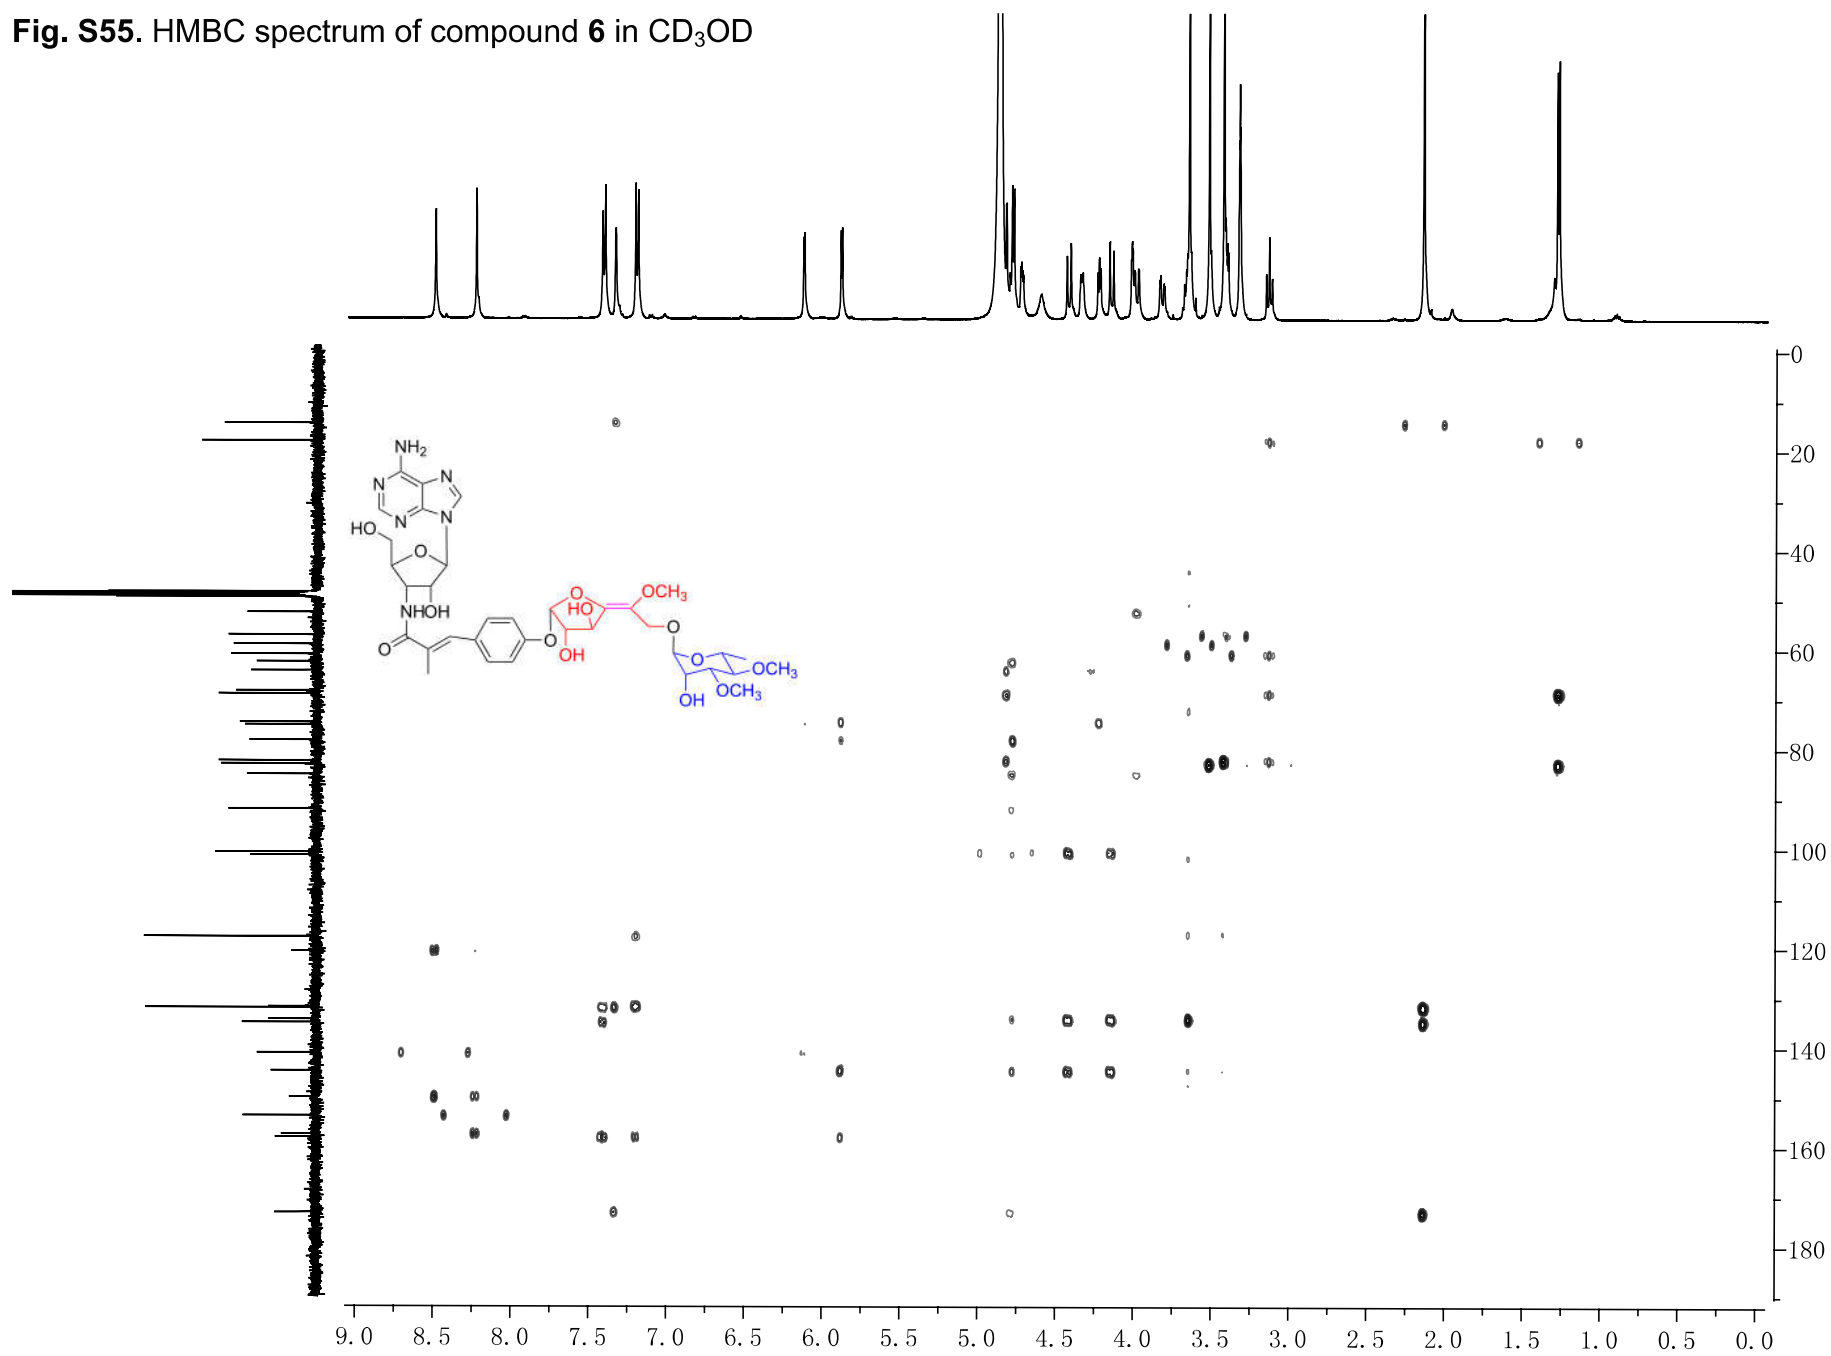

Fig. S56. <sup>1</sup>H NMR (500 MHz) spectrum of compound 7 in CD<sub>3</sub>OD

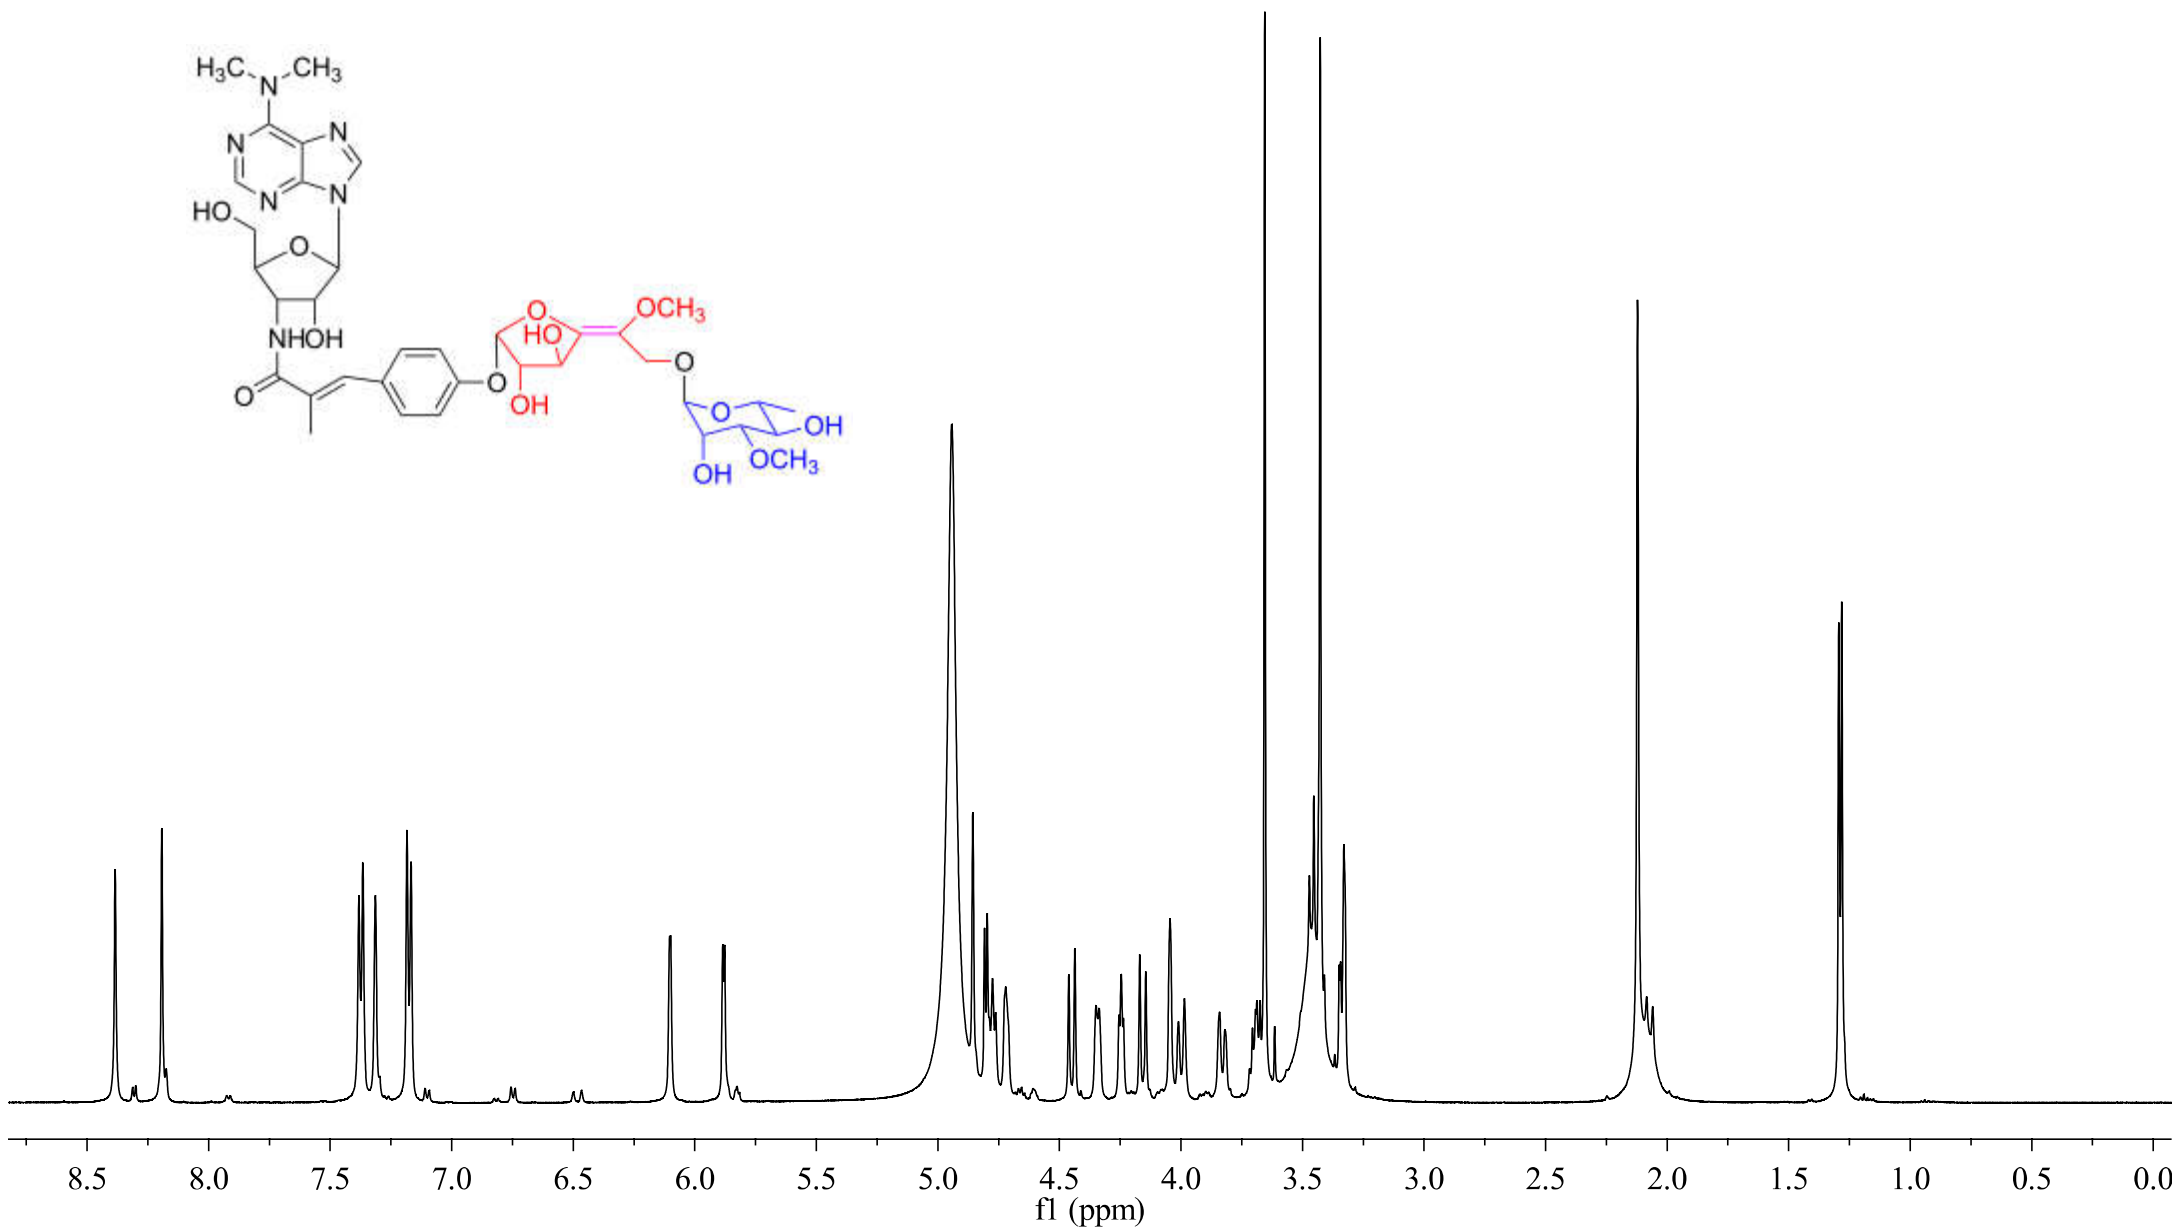

Fig. S57.  $^{13}\text{C}$  NMR (125 MHz) spectrum of compound 7 in  $\text{CD}_3\text{OD}$

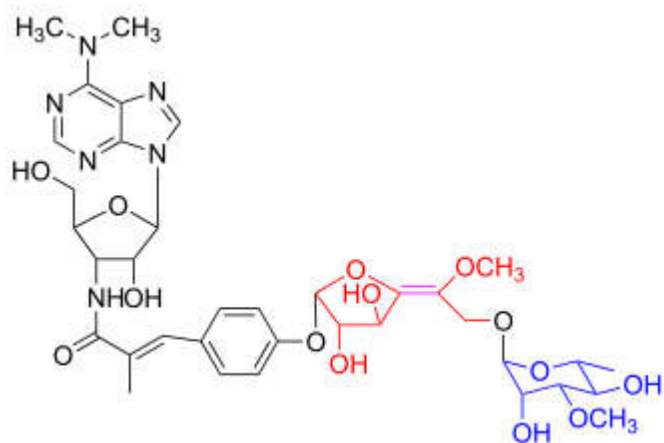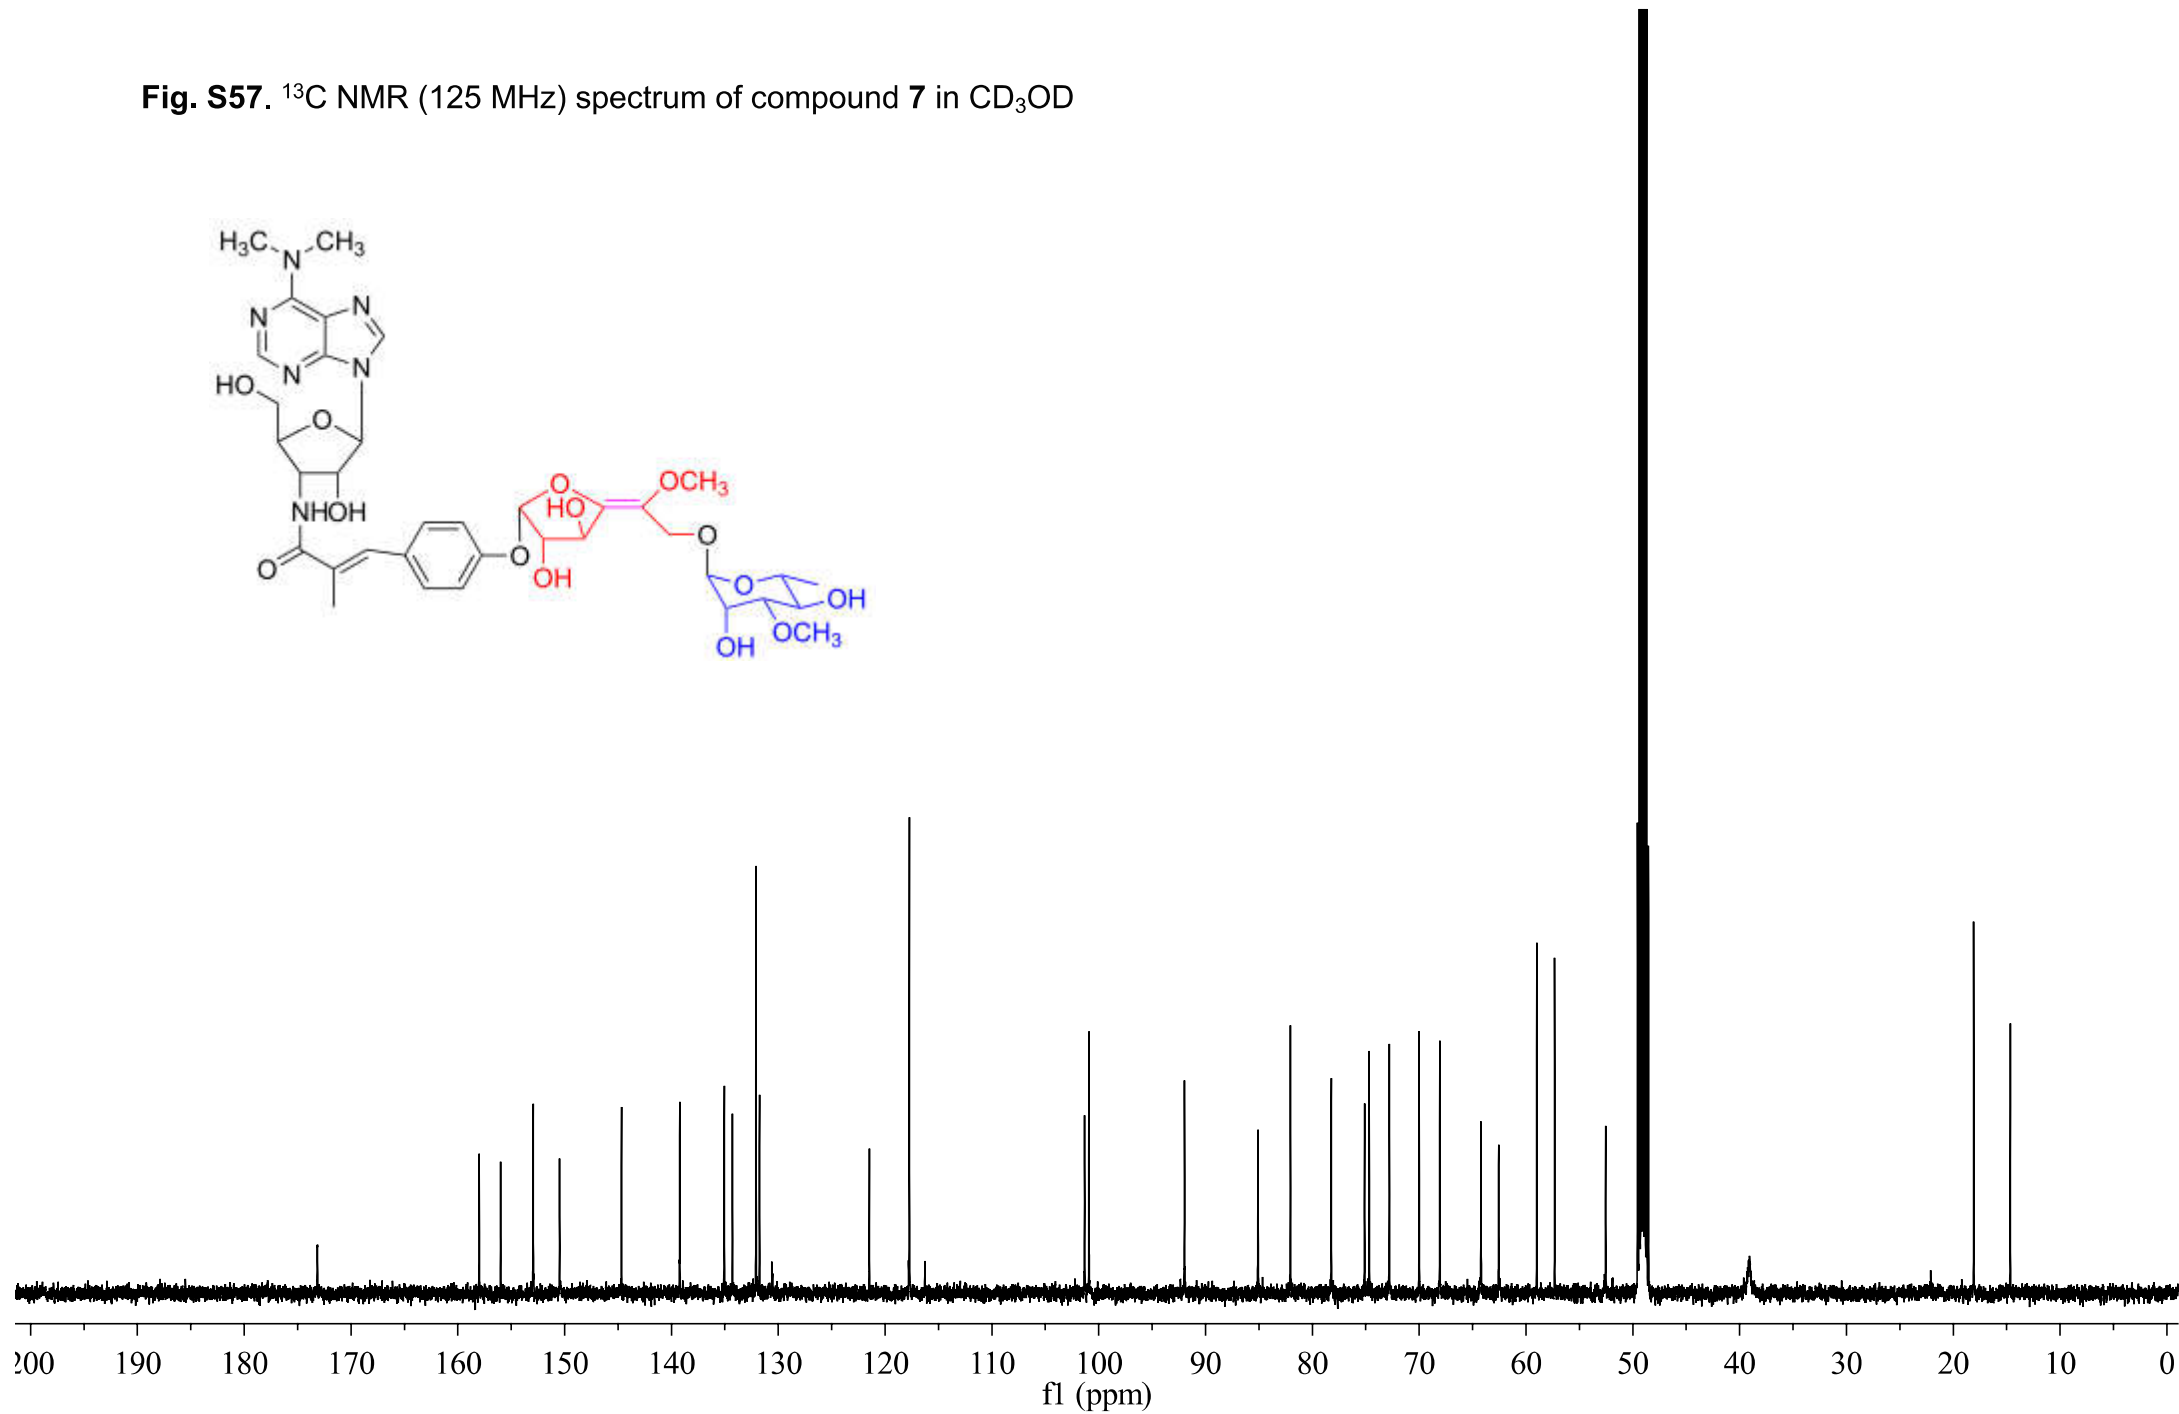

Fig. S58. HSQC spectrum of compound 7 in CD<sub>3</sub>OD

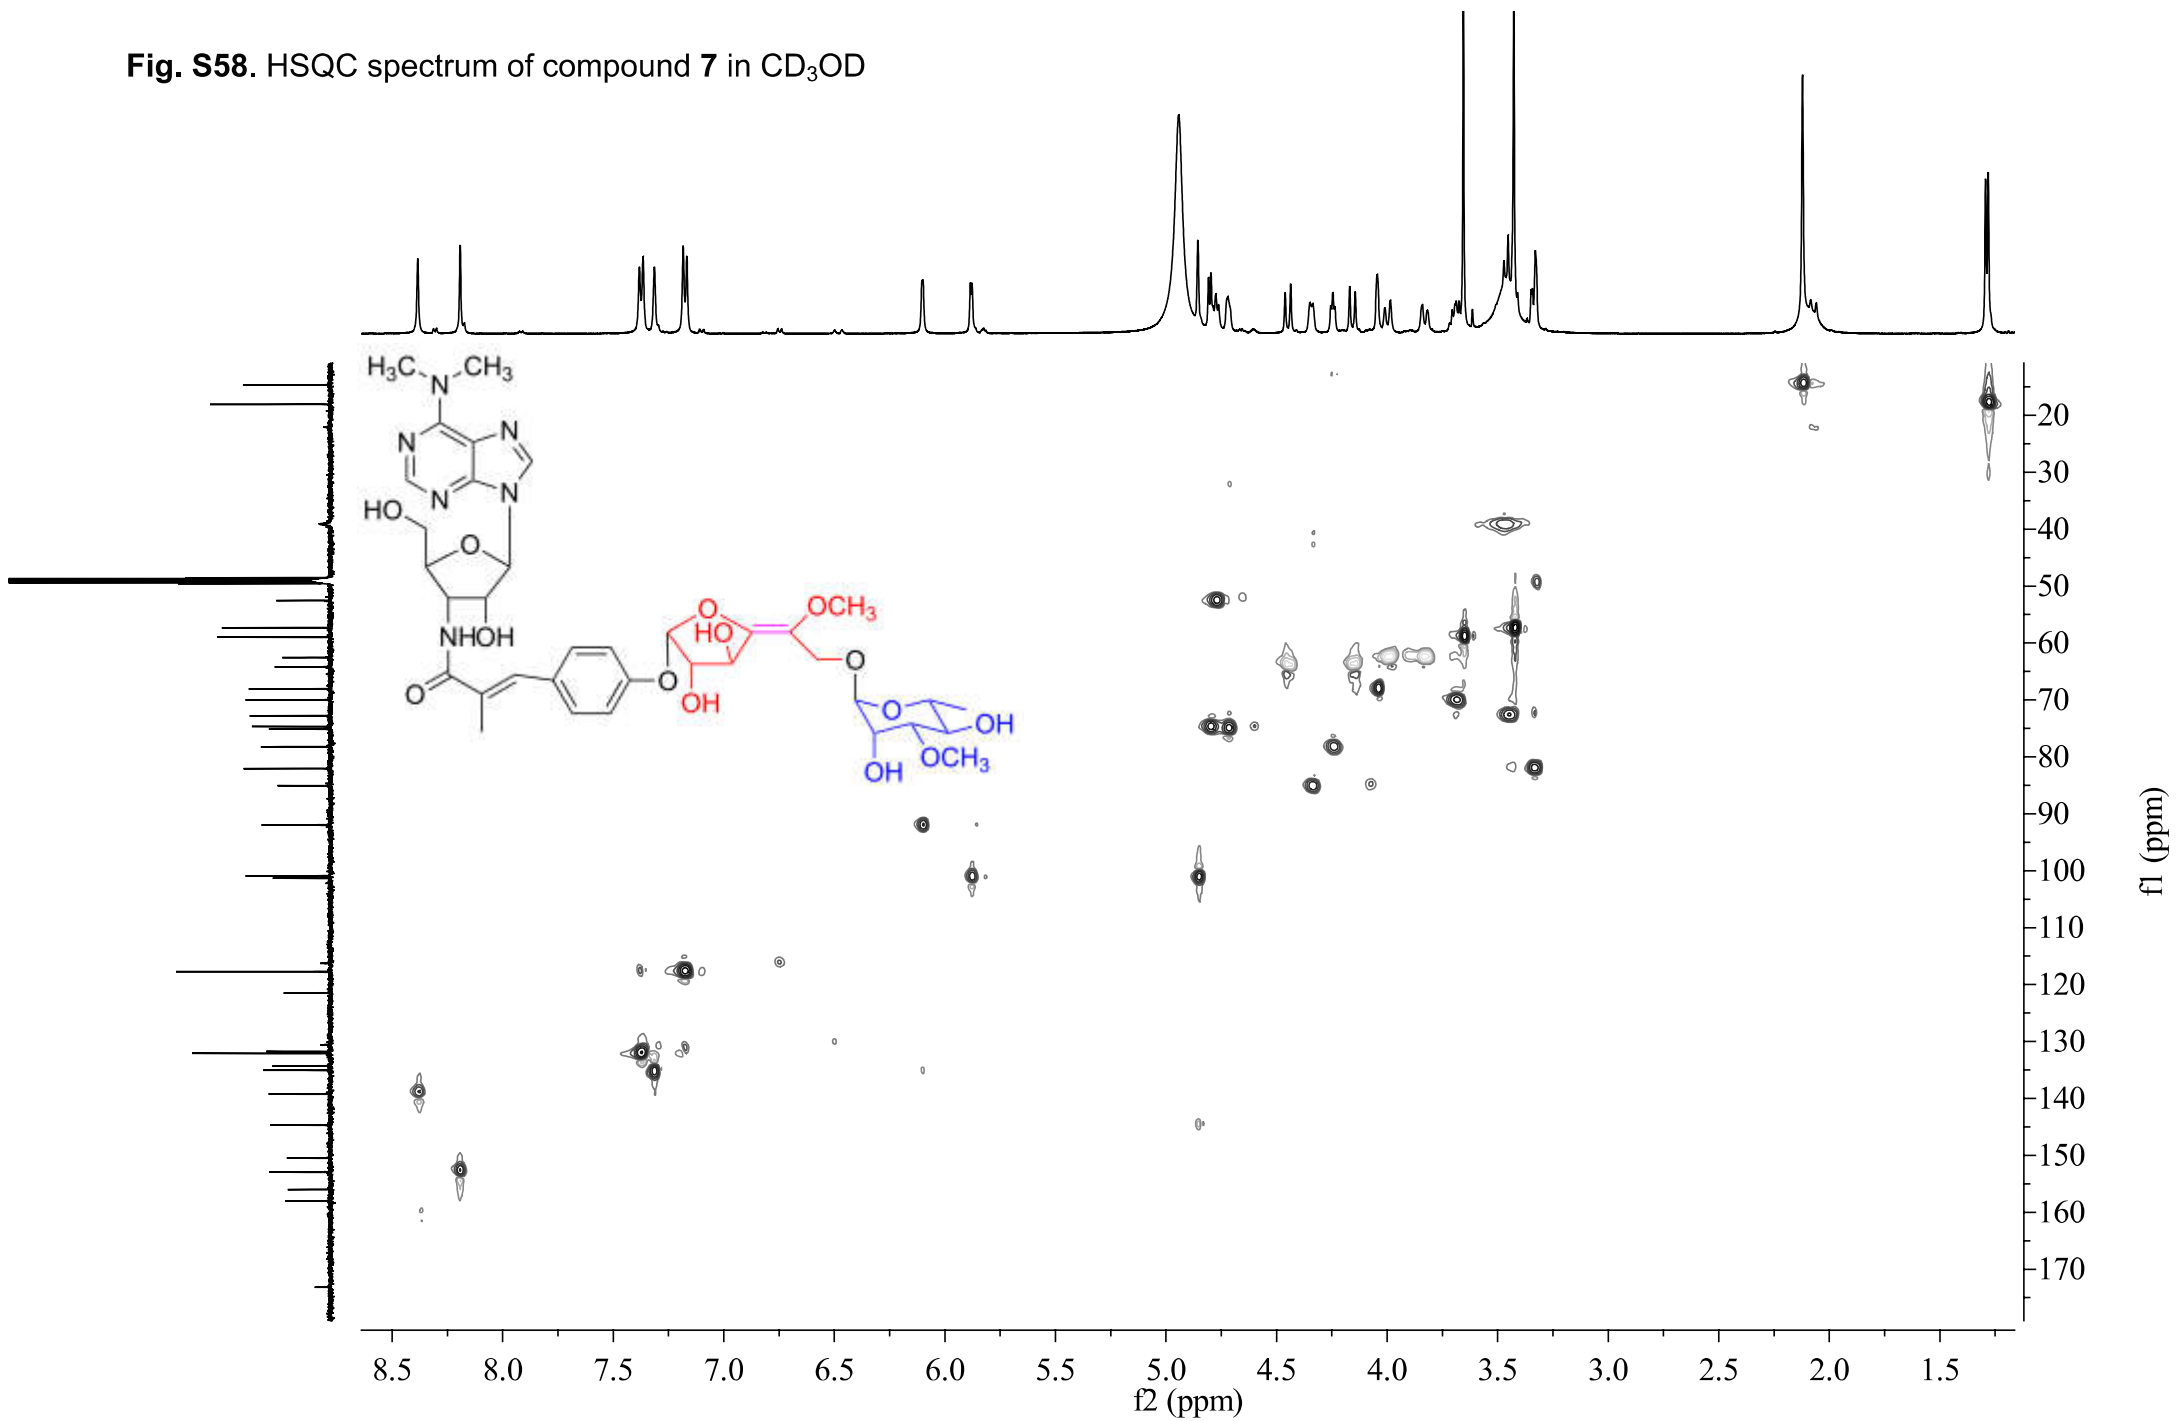



Fig. S59.  $^1\text{H}$ - $^1\text{H}$  COSY spectrum of compound 7 in  $\text{CD}_3\text{OD}$

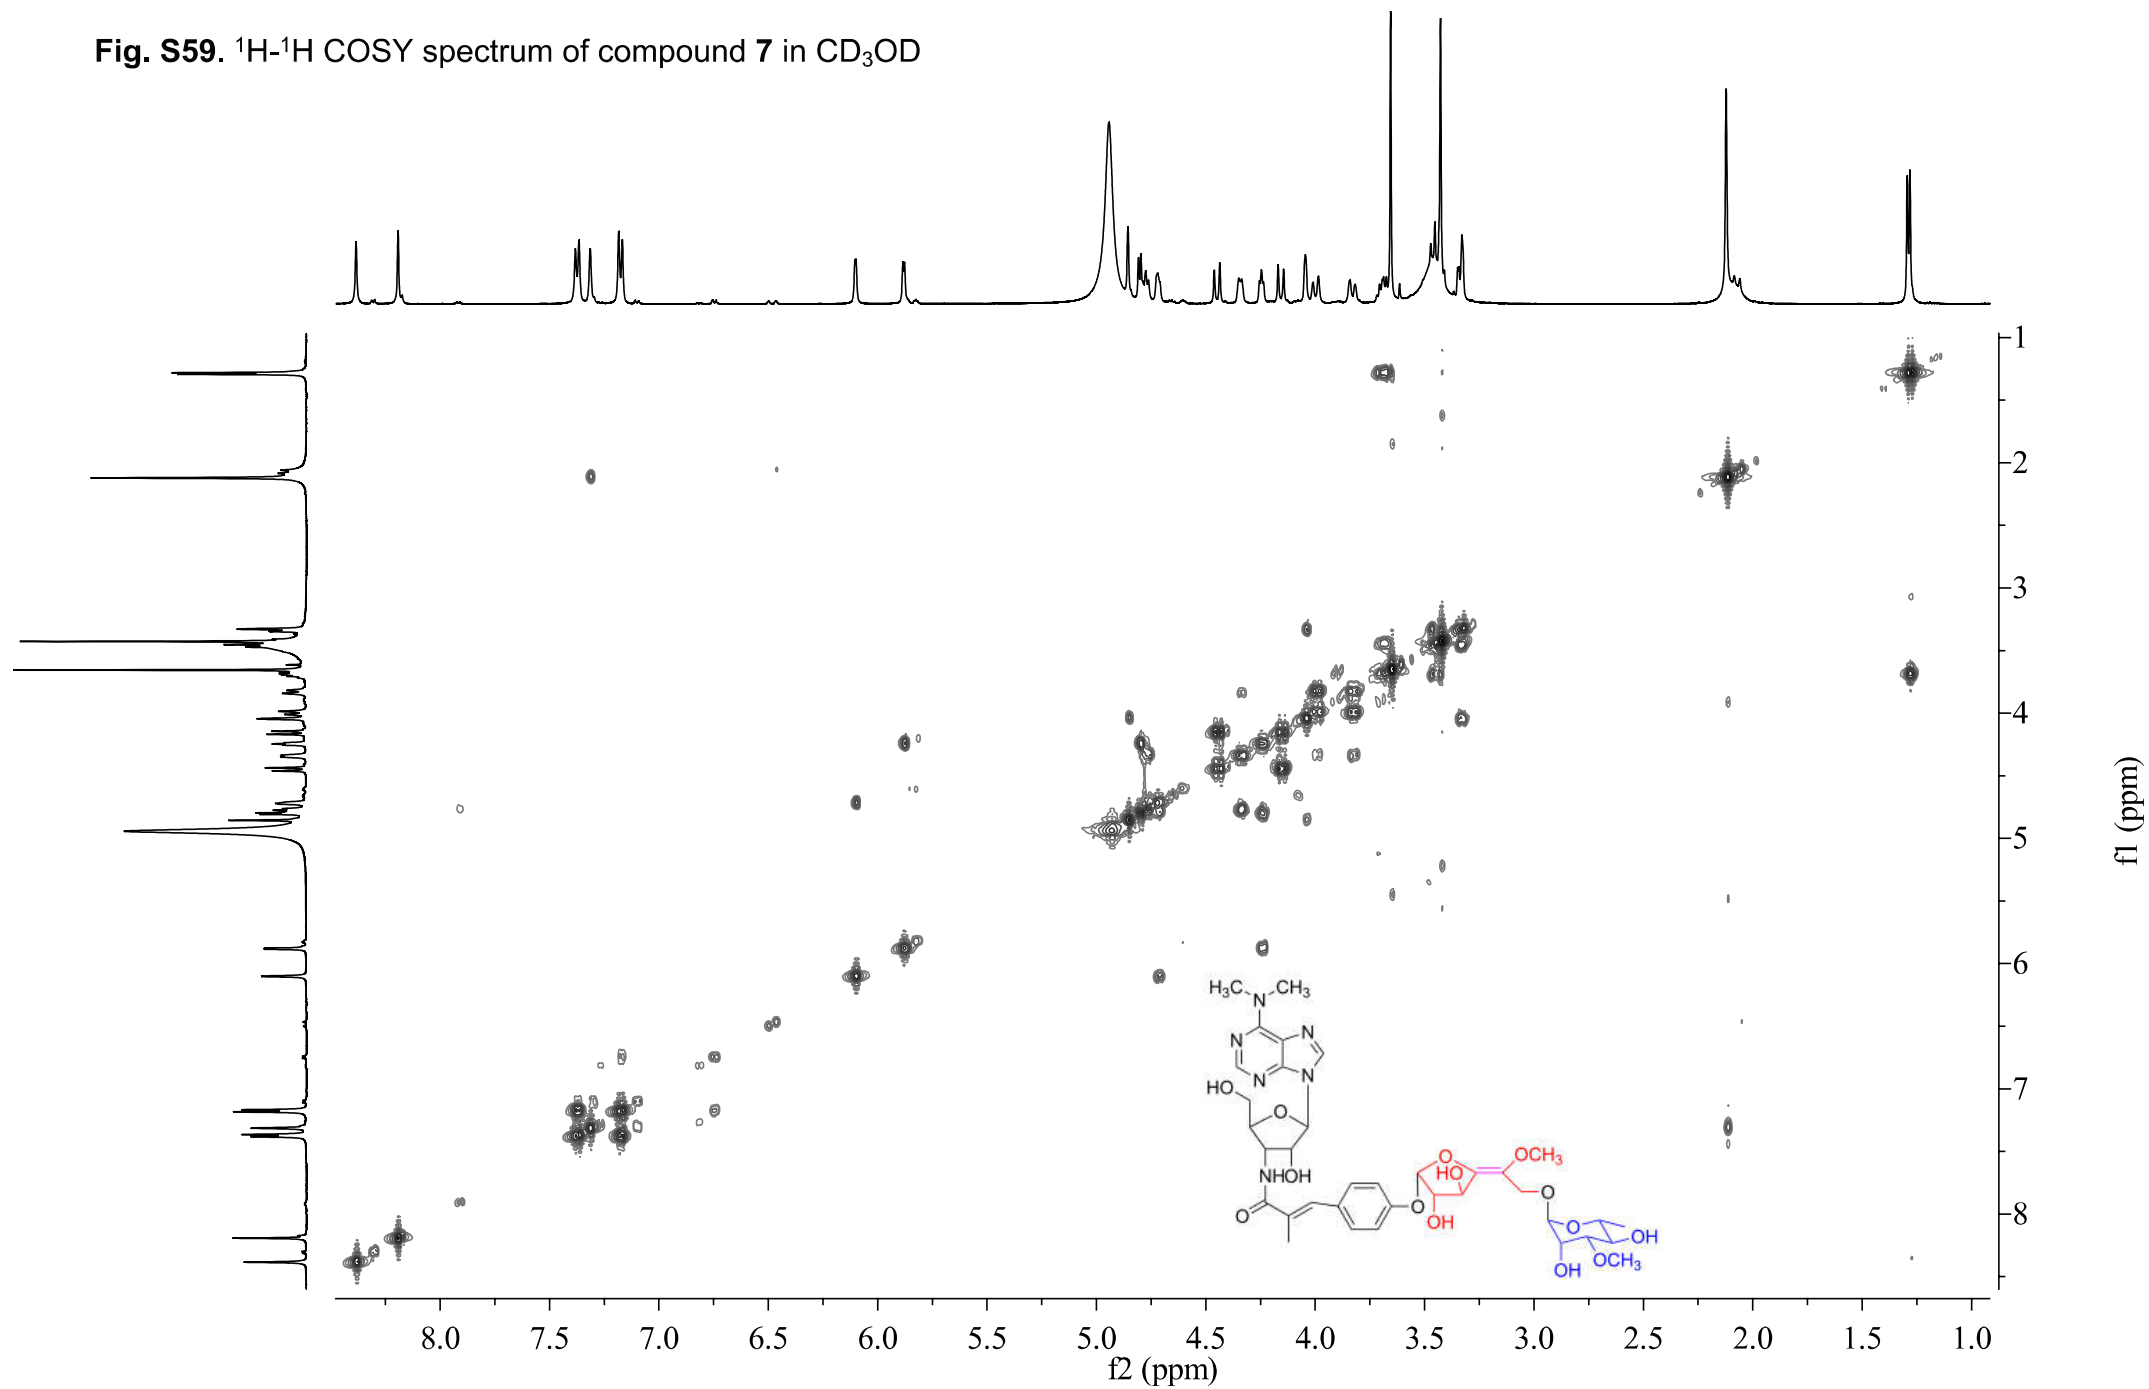

Fig. S60. HMBC spectrum of compound 7 in CD<sub>3</sub>OD

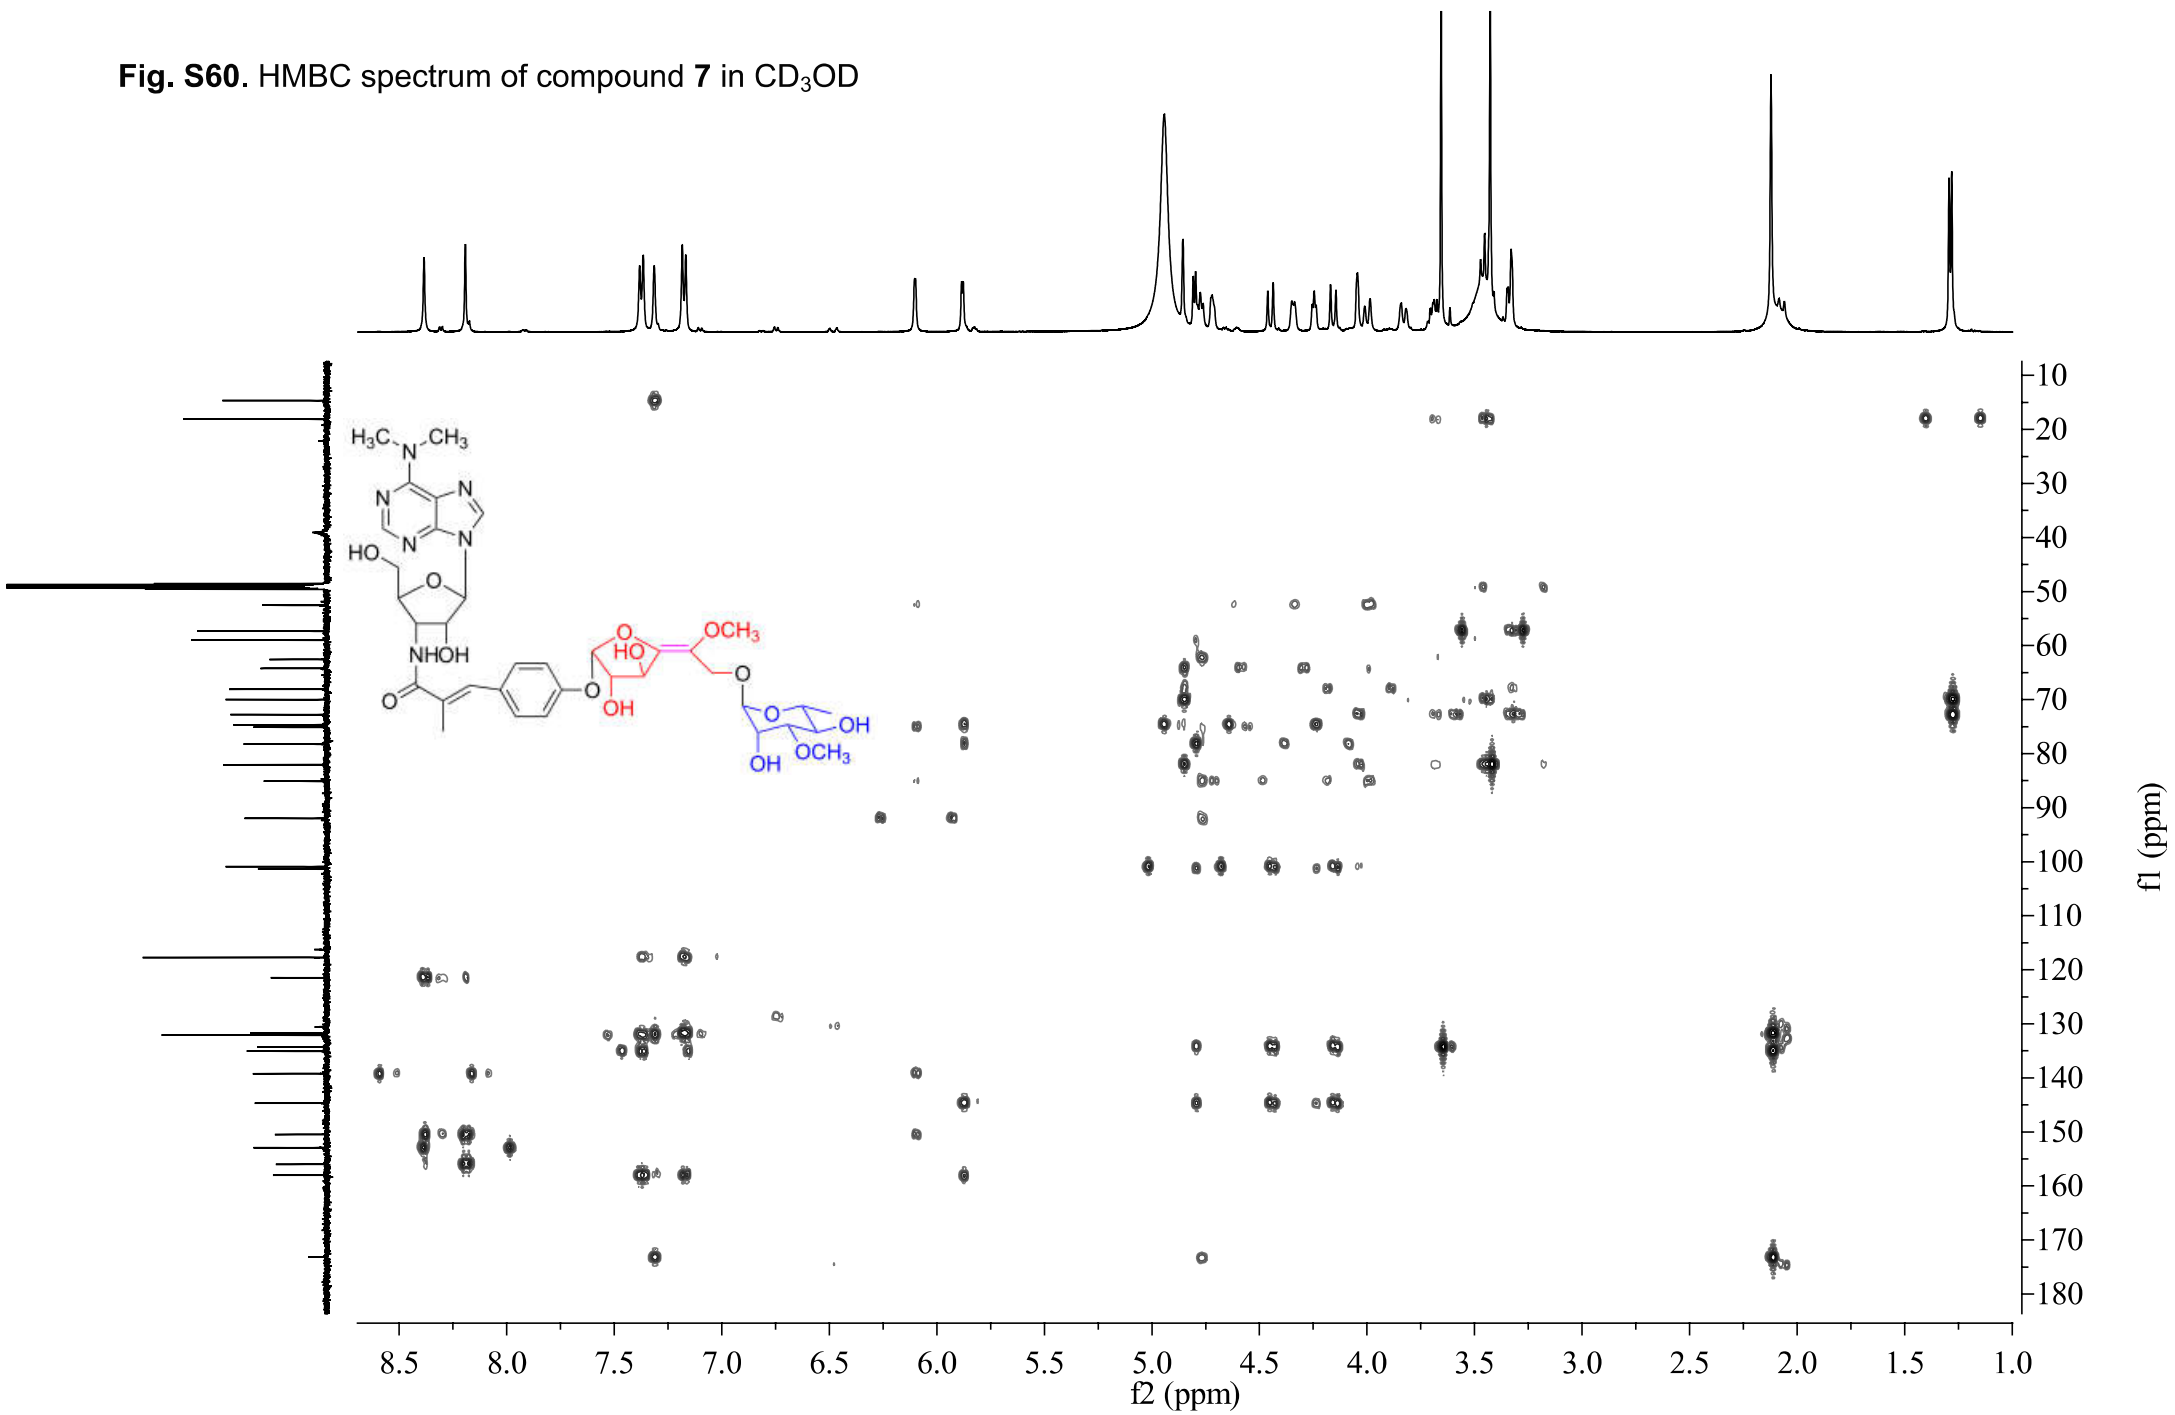

Fig. S61. <sup>1</sup>H NMR (500 MHz) spectrum of compound 8 in CD<sub>3</sub>OD

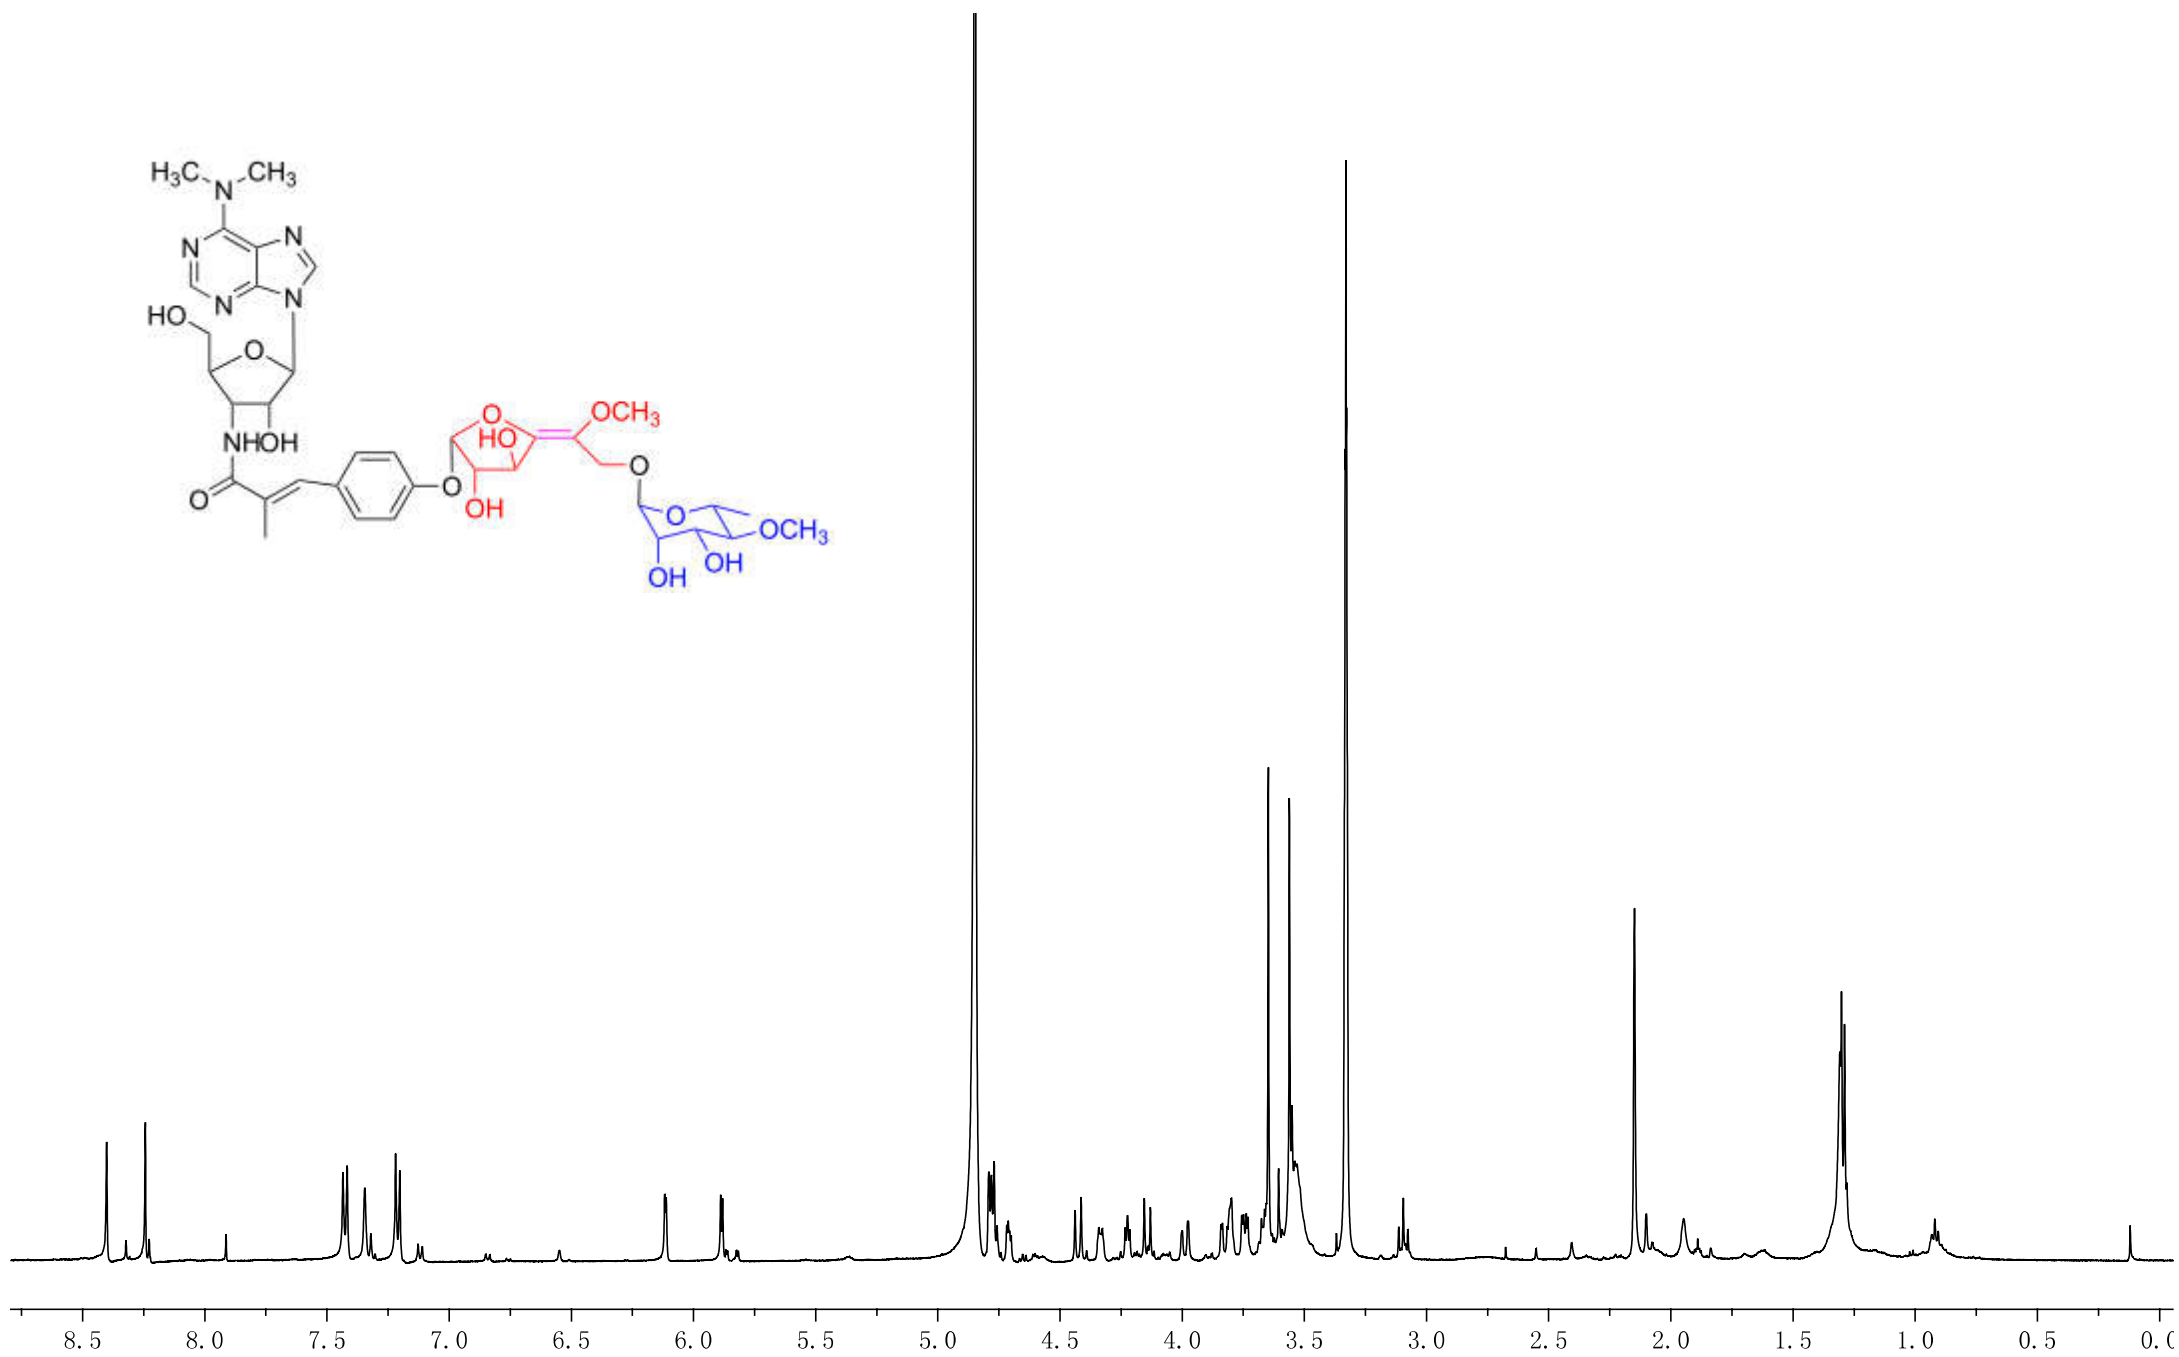

**Fig. S62.**  $^{13}\text{C}$  NMR (125 MHz) spectrum of compound **8** in  $\text{CD}_3\text{OD}$

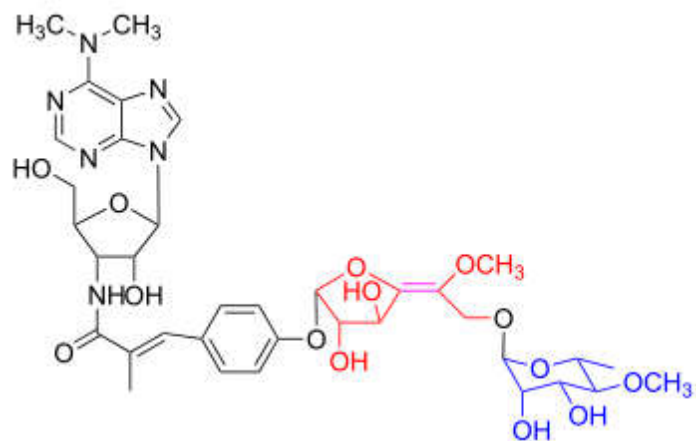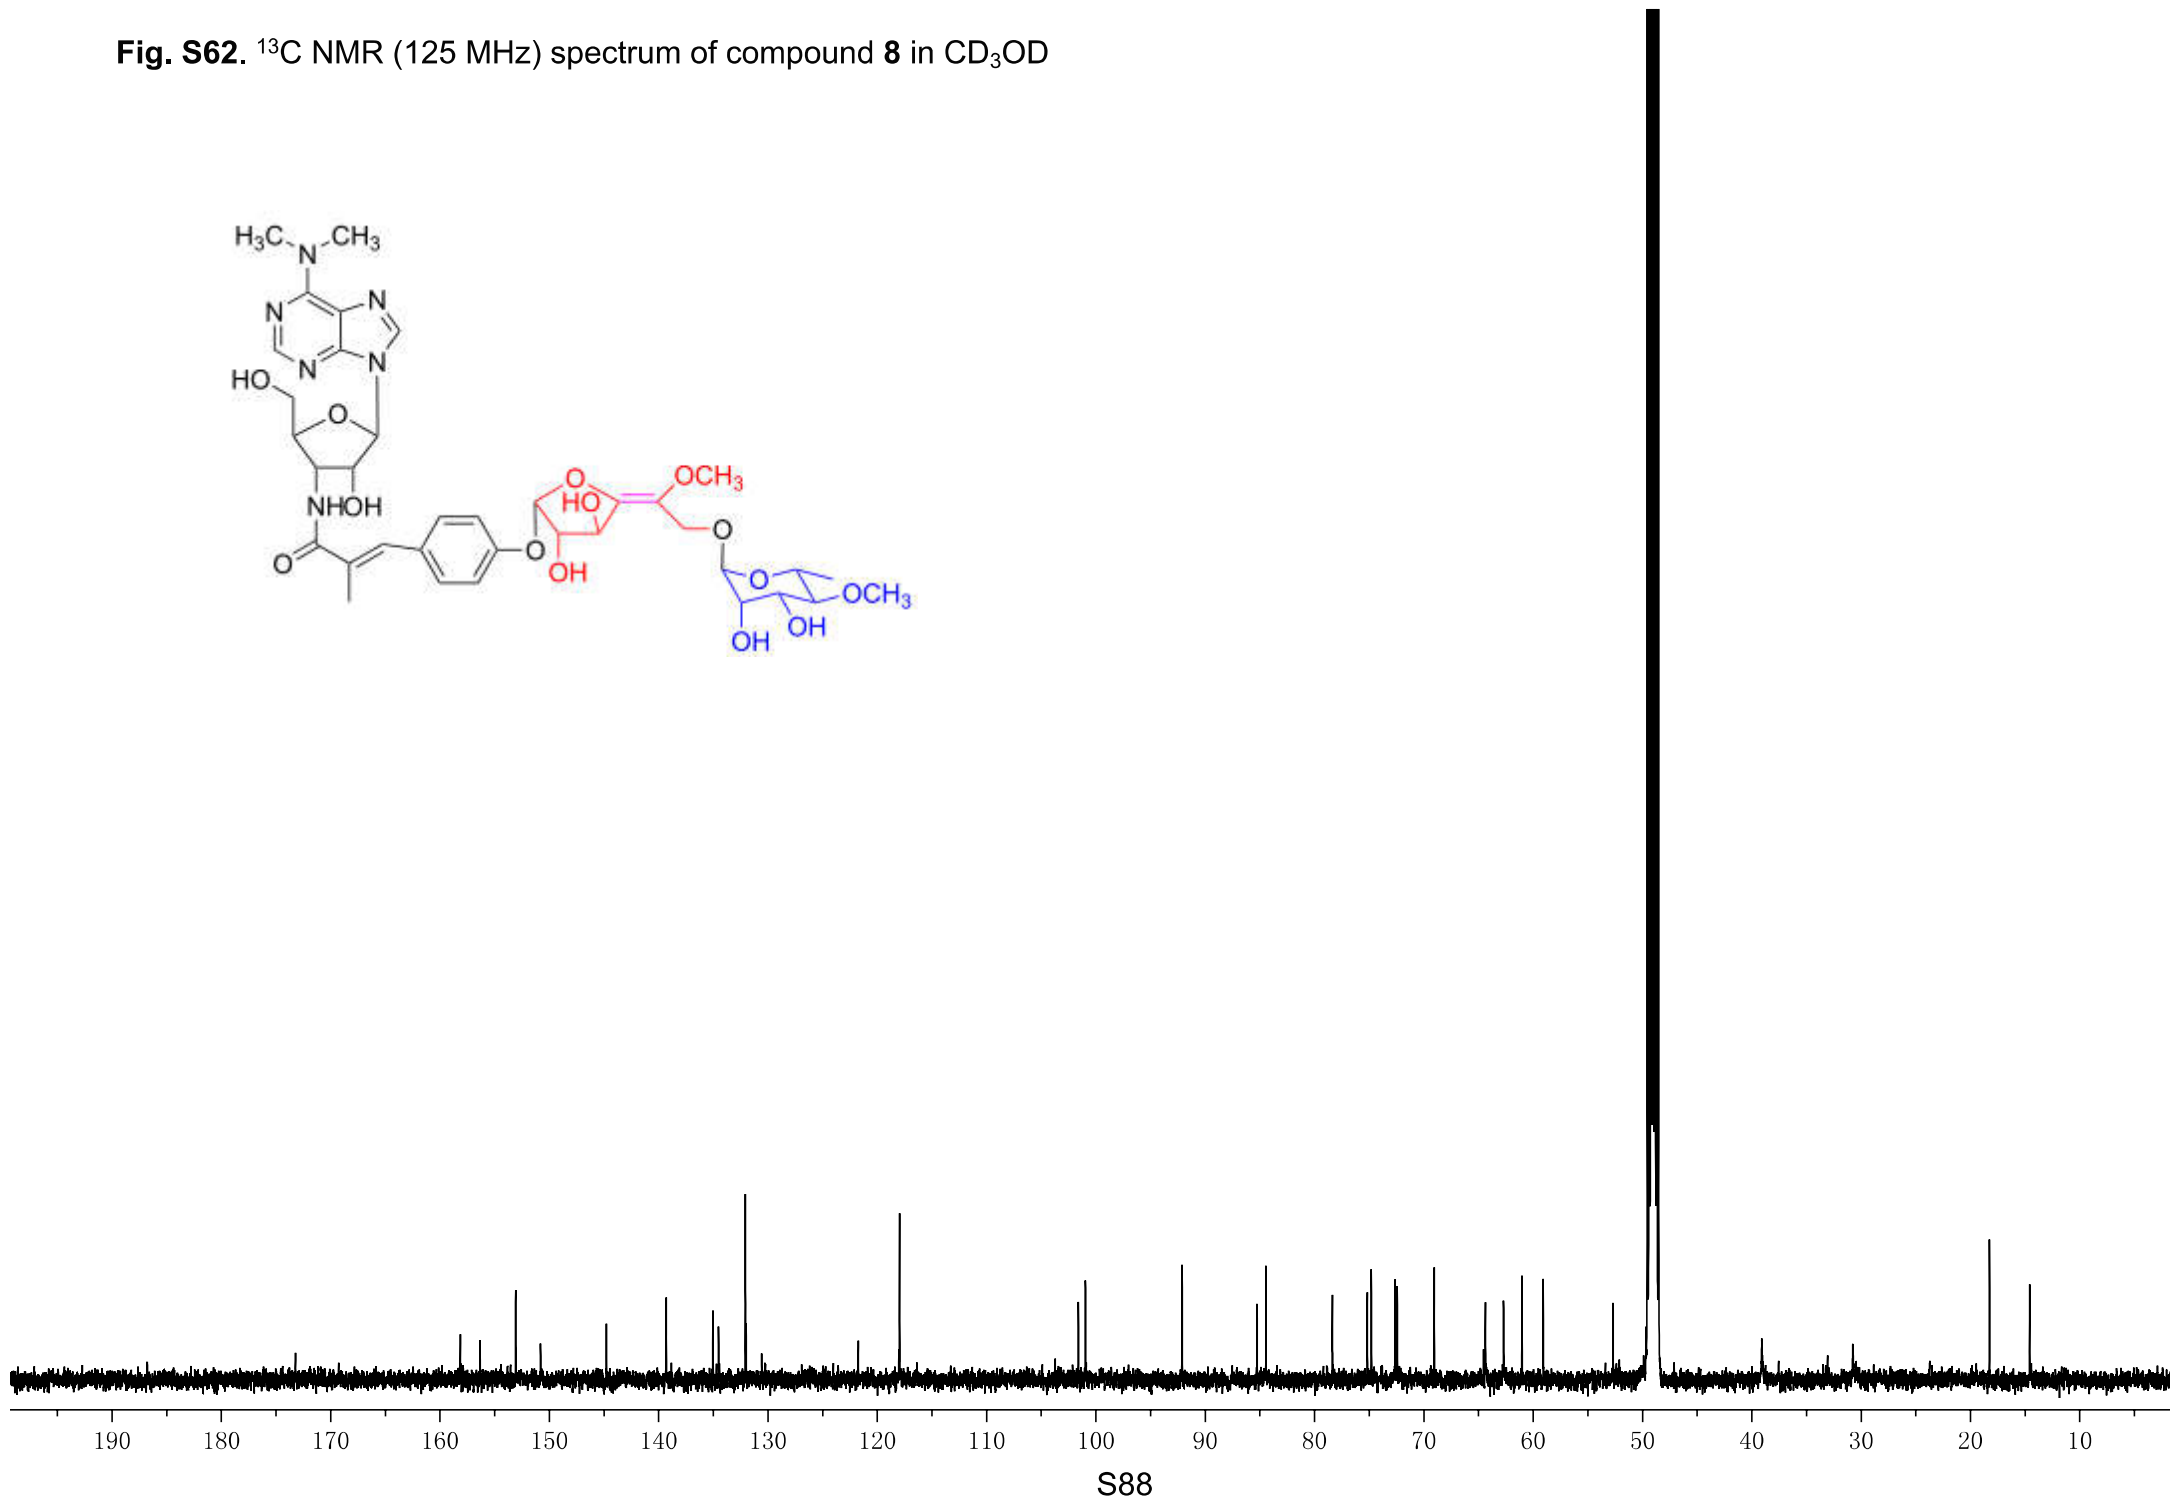

Fig. S63. HSQC spectrum of compound **8** in CD<sub>3</sub>OD

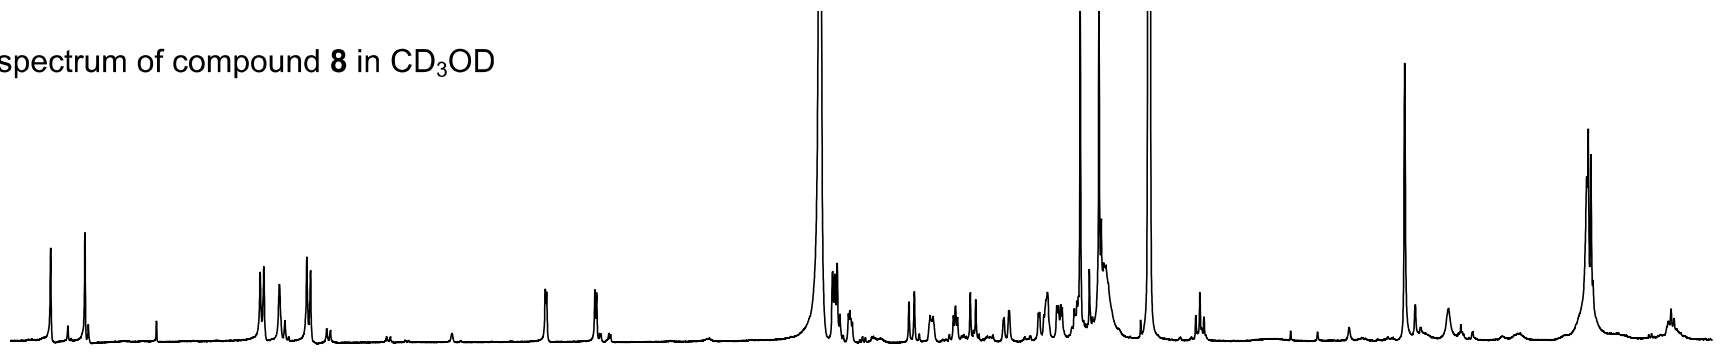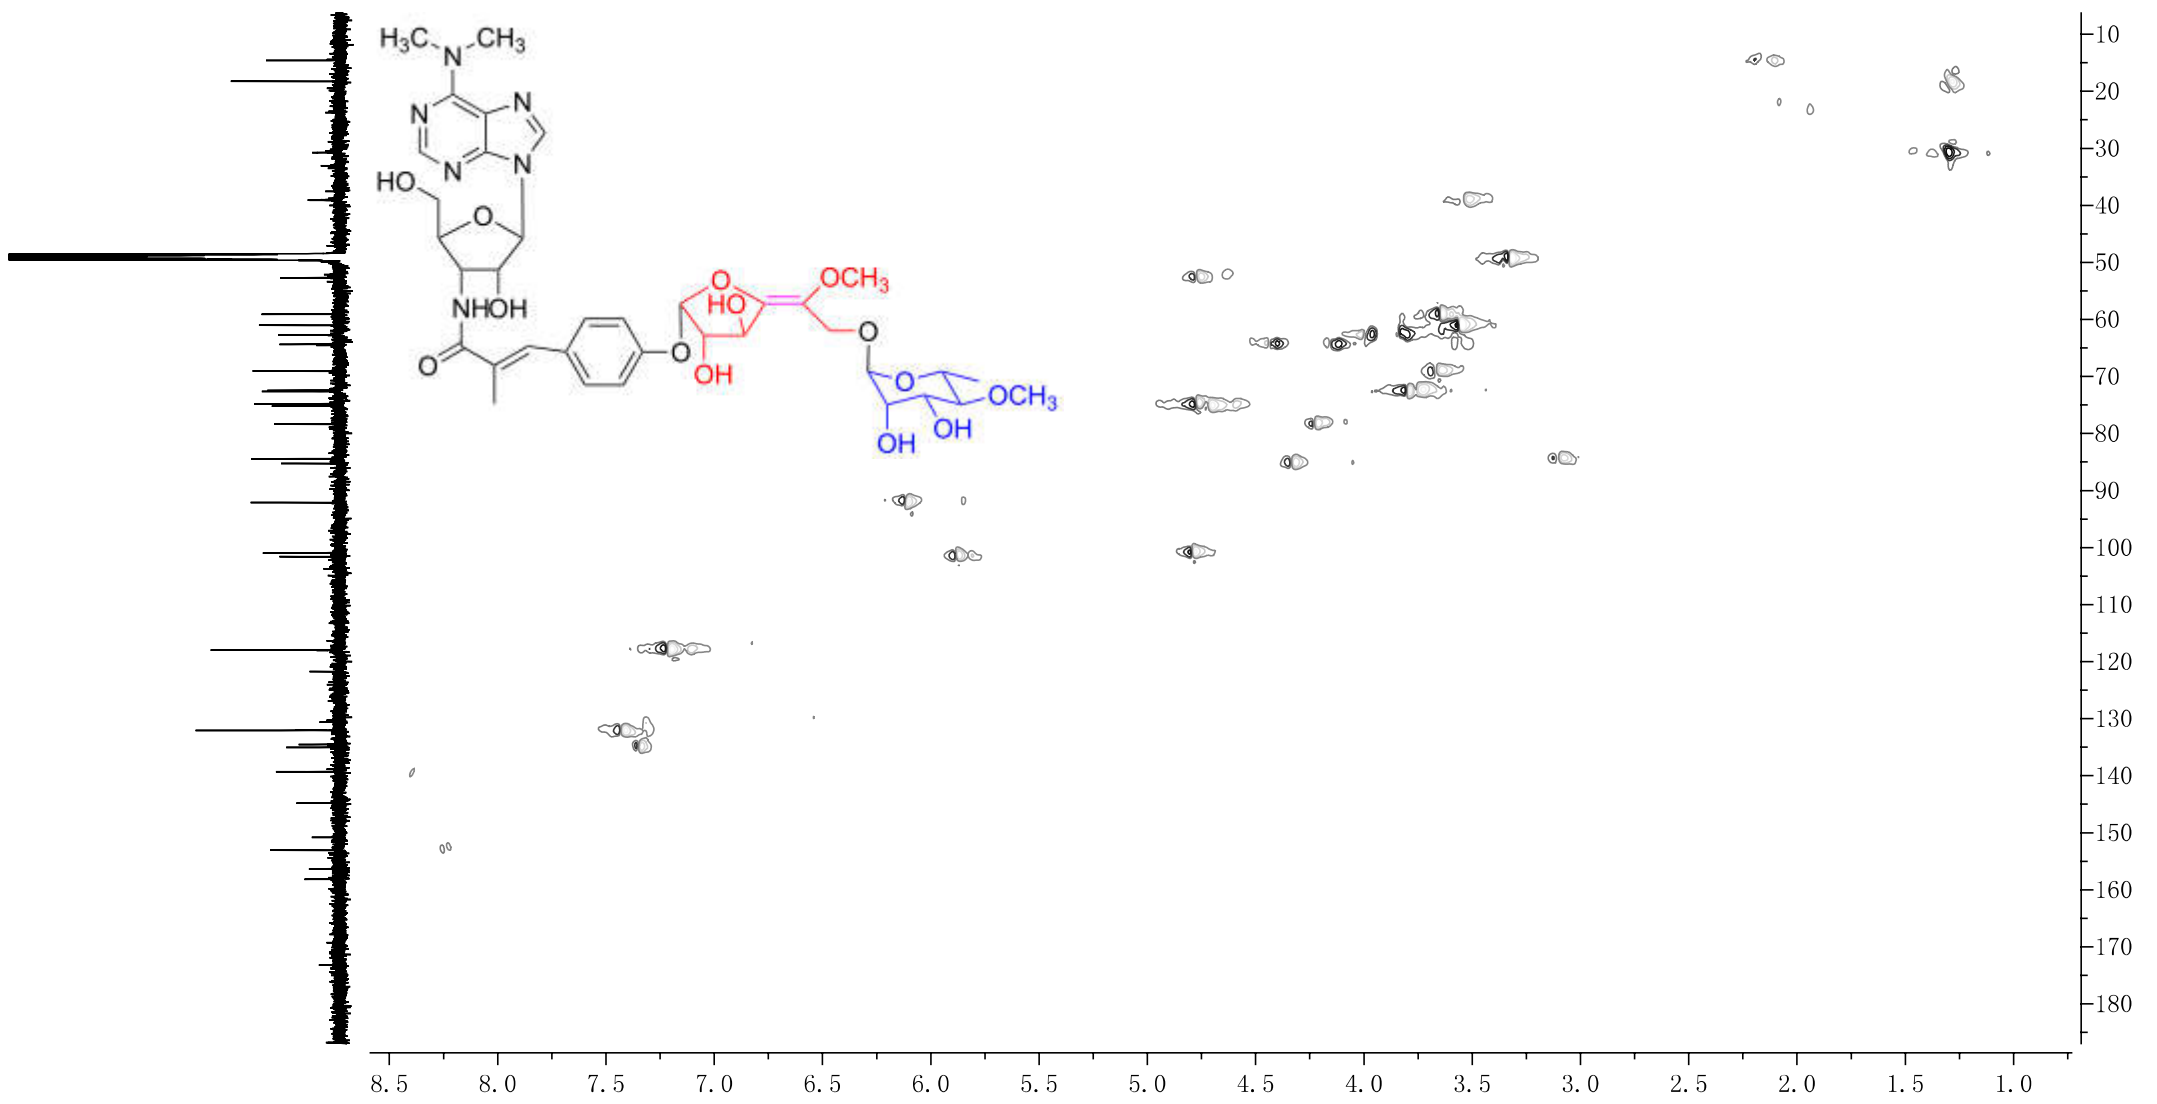

Fig. S64.  $^1\text{H}$ - $^1\text{H}$  COSY spectrum of compound **8** in  $\text{CD}_3\text{OD}$

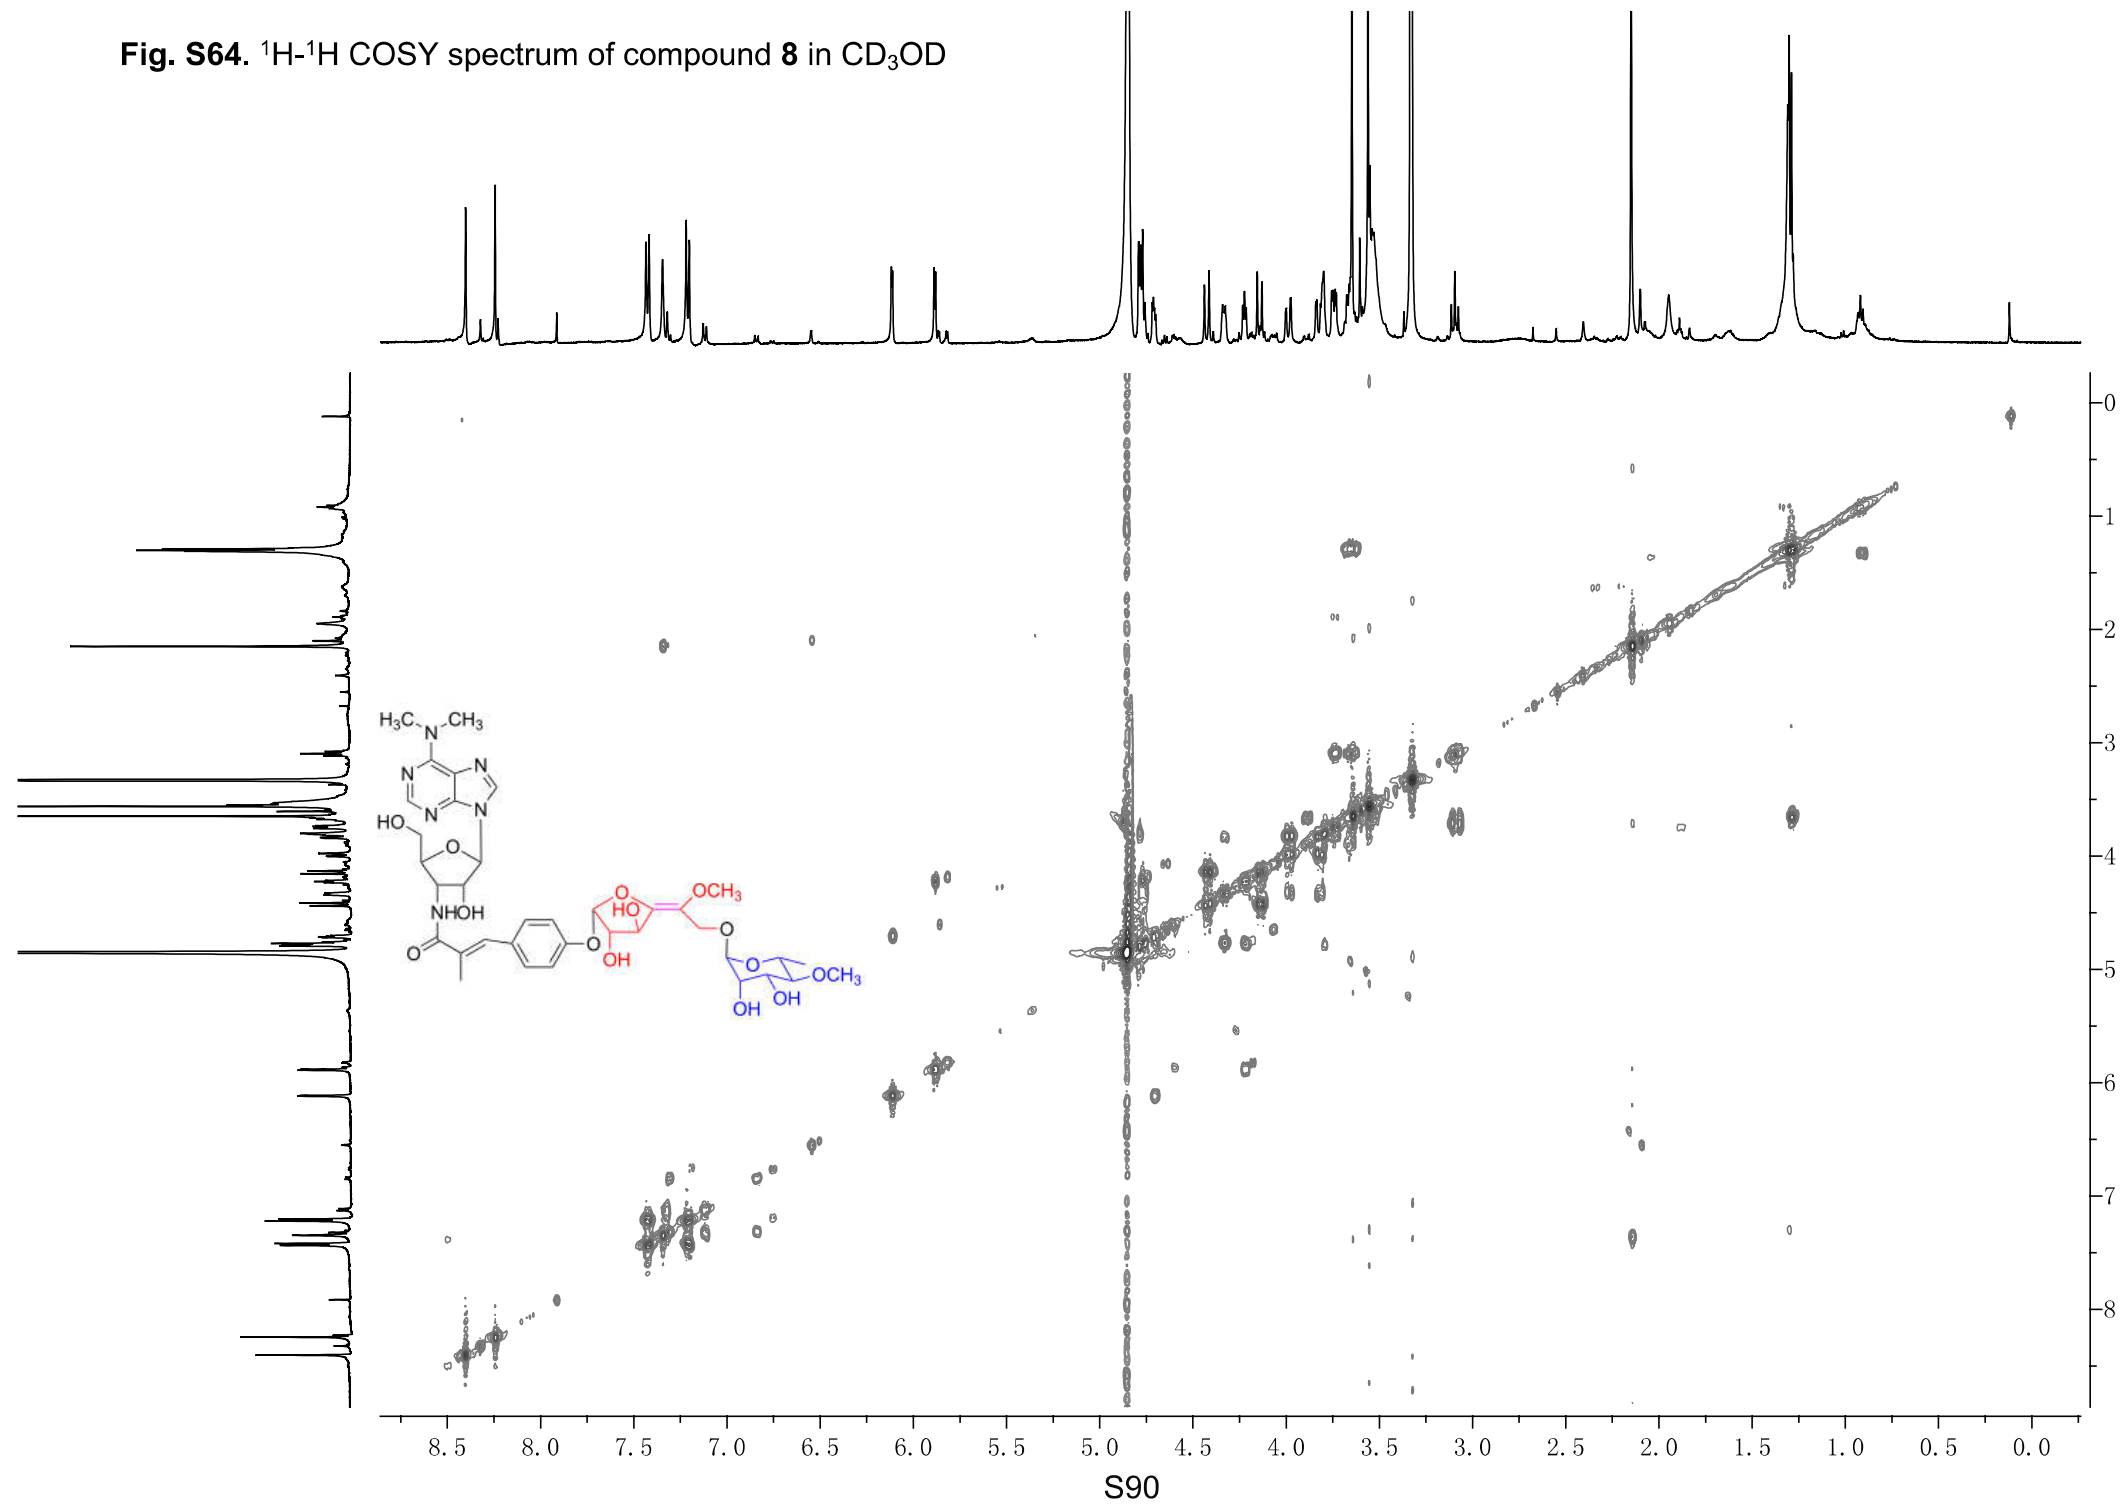

Fig. S65. HMBC spectrum of compound **8** in CD<sub>3</sub>OD

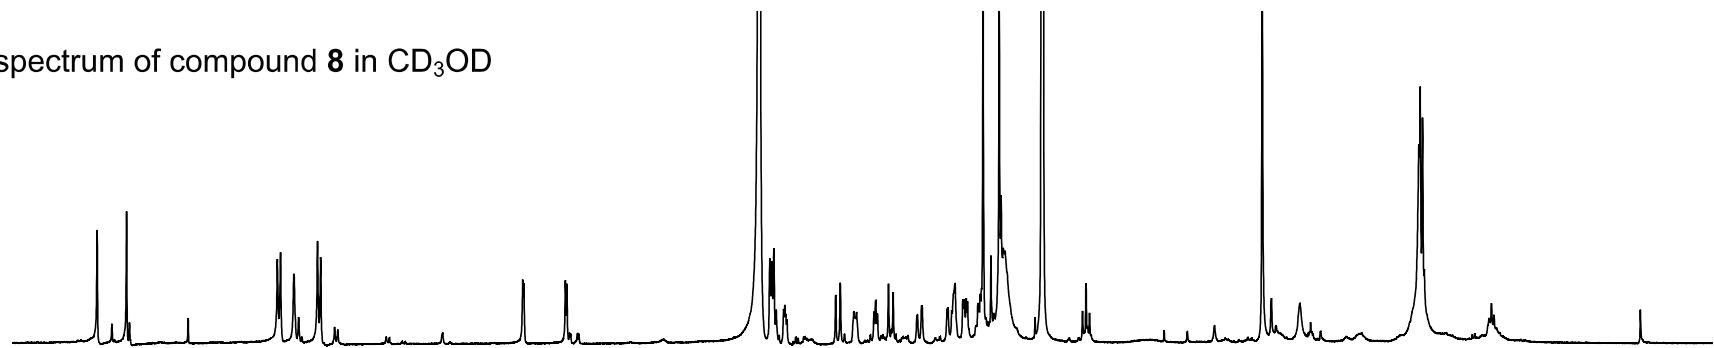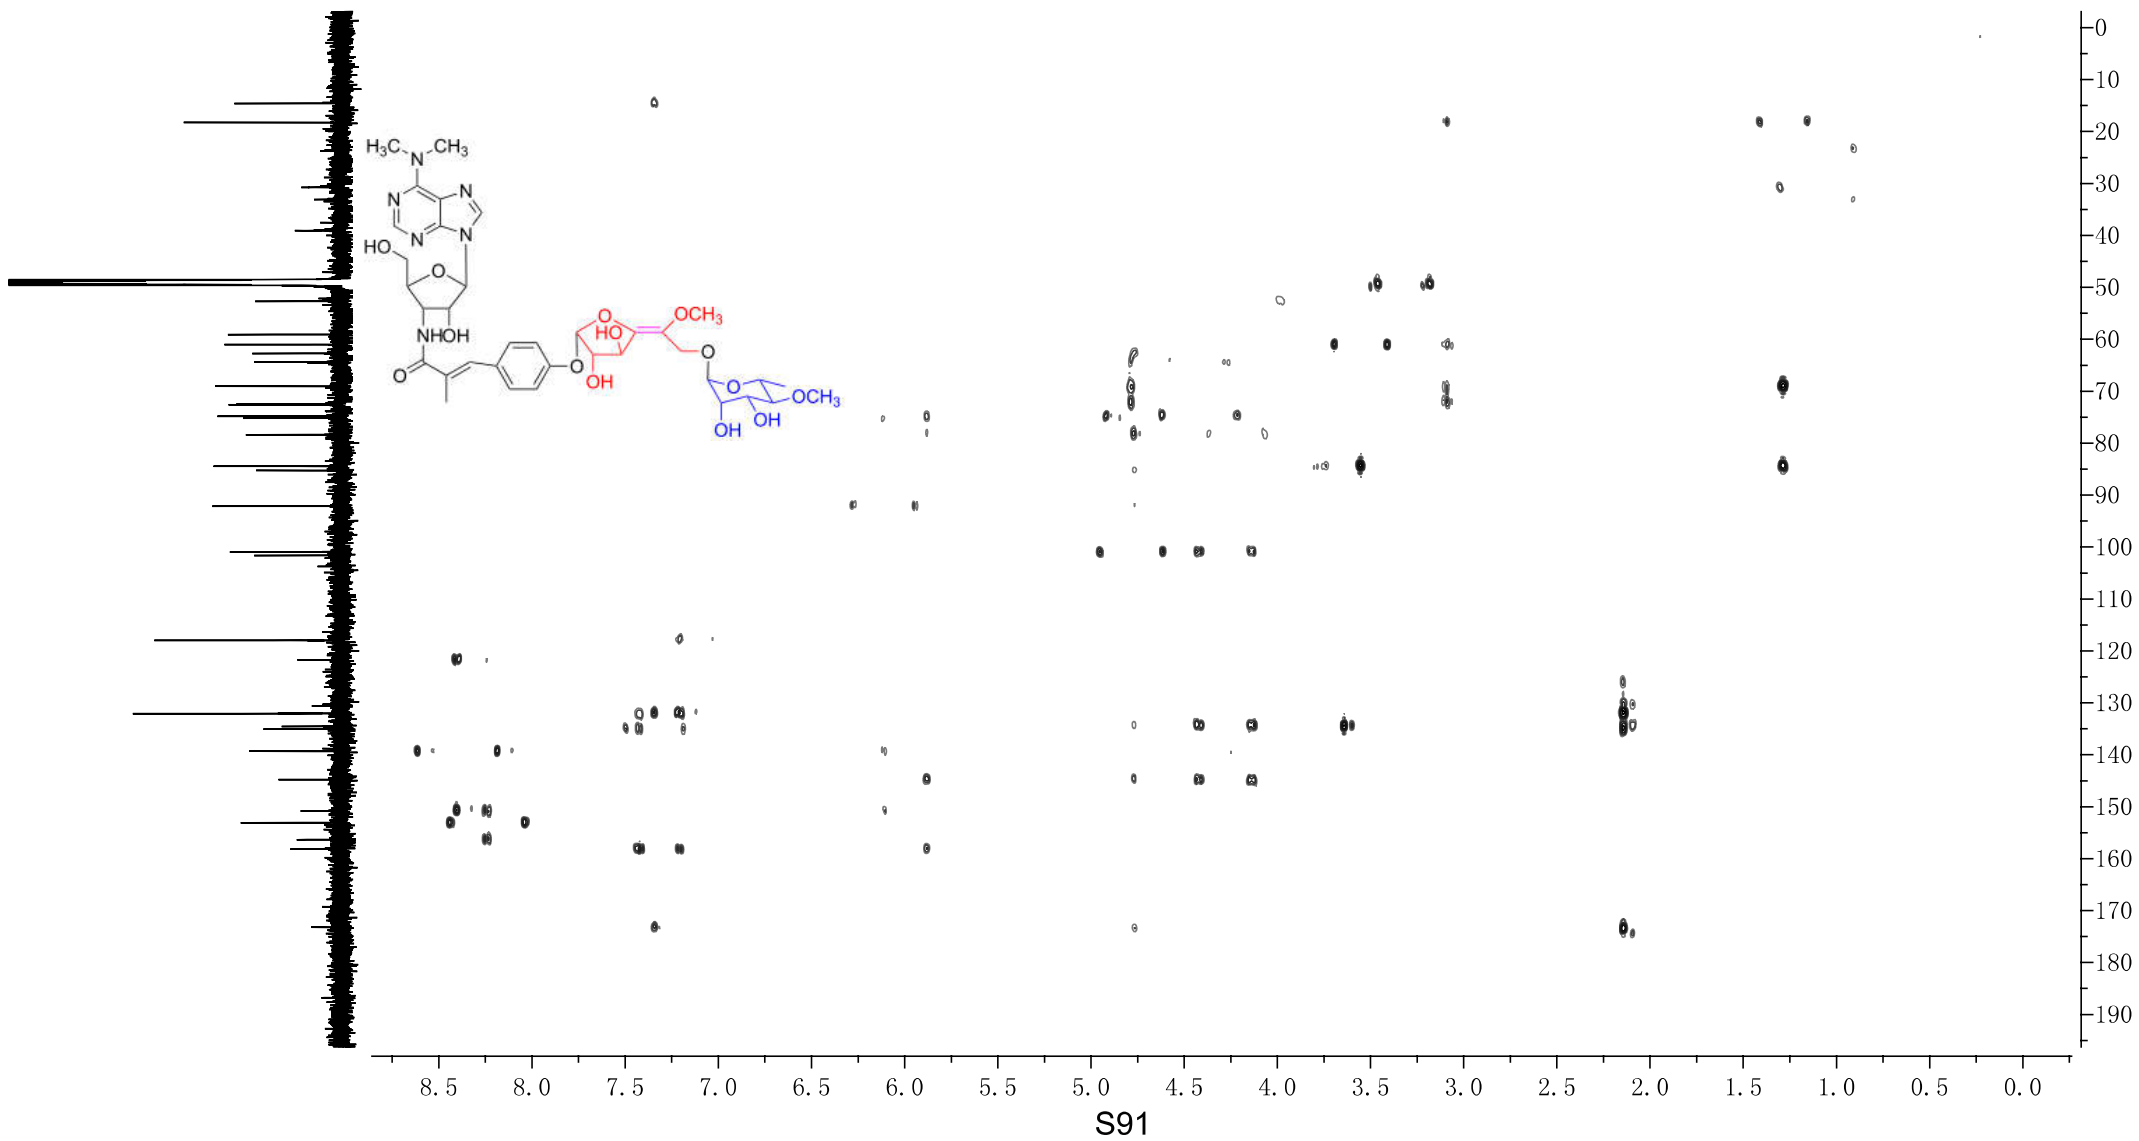

**Fig. S66.**  $^1\text{H}$  NMR (500 MHz) spectrum of compound **9** in  $\text{CD}_3\text{OD}$

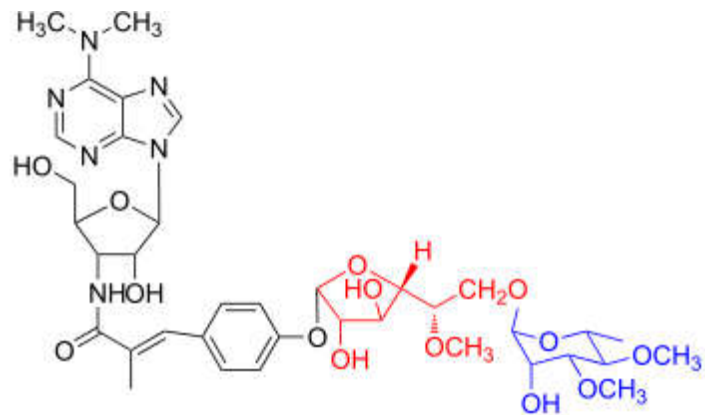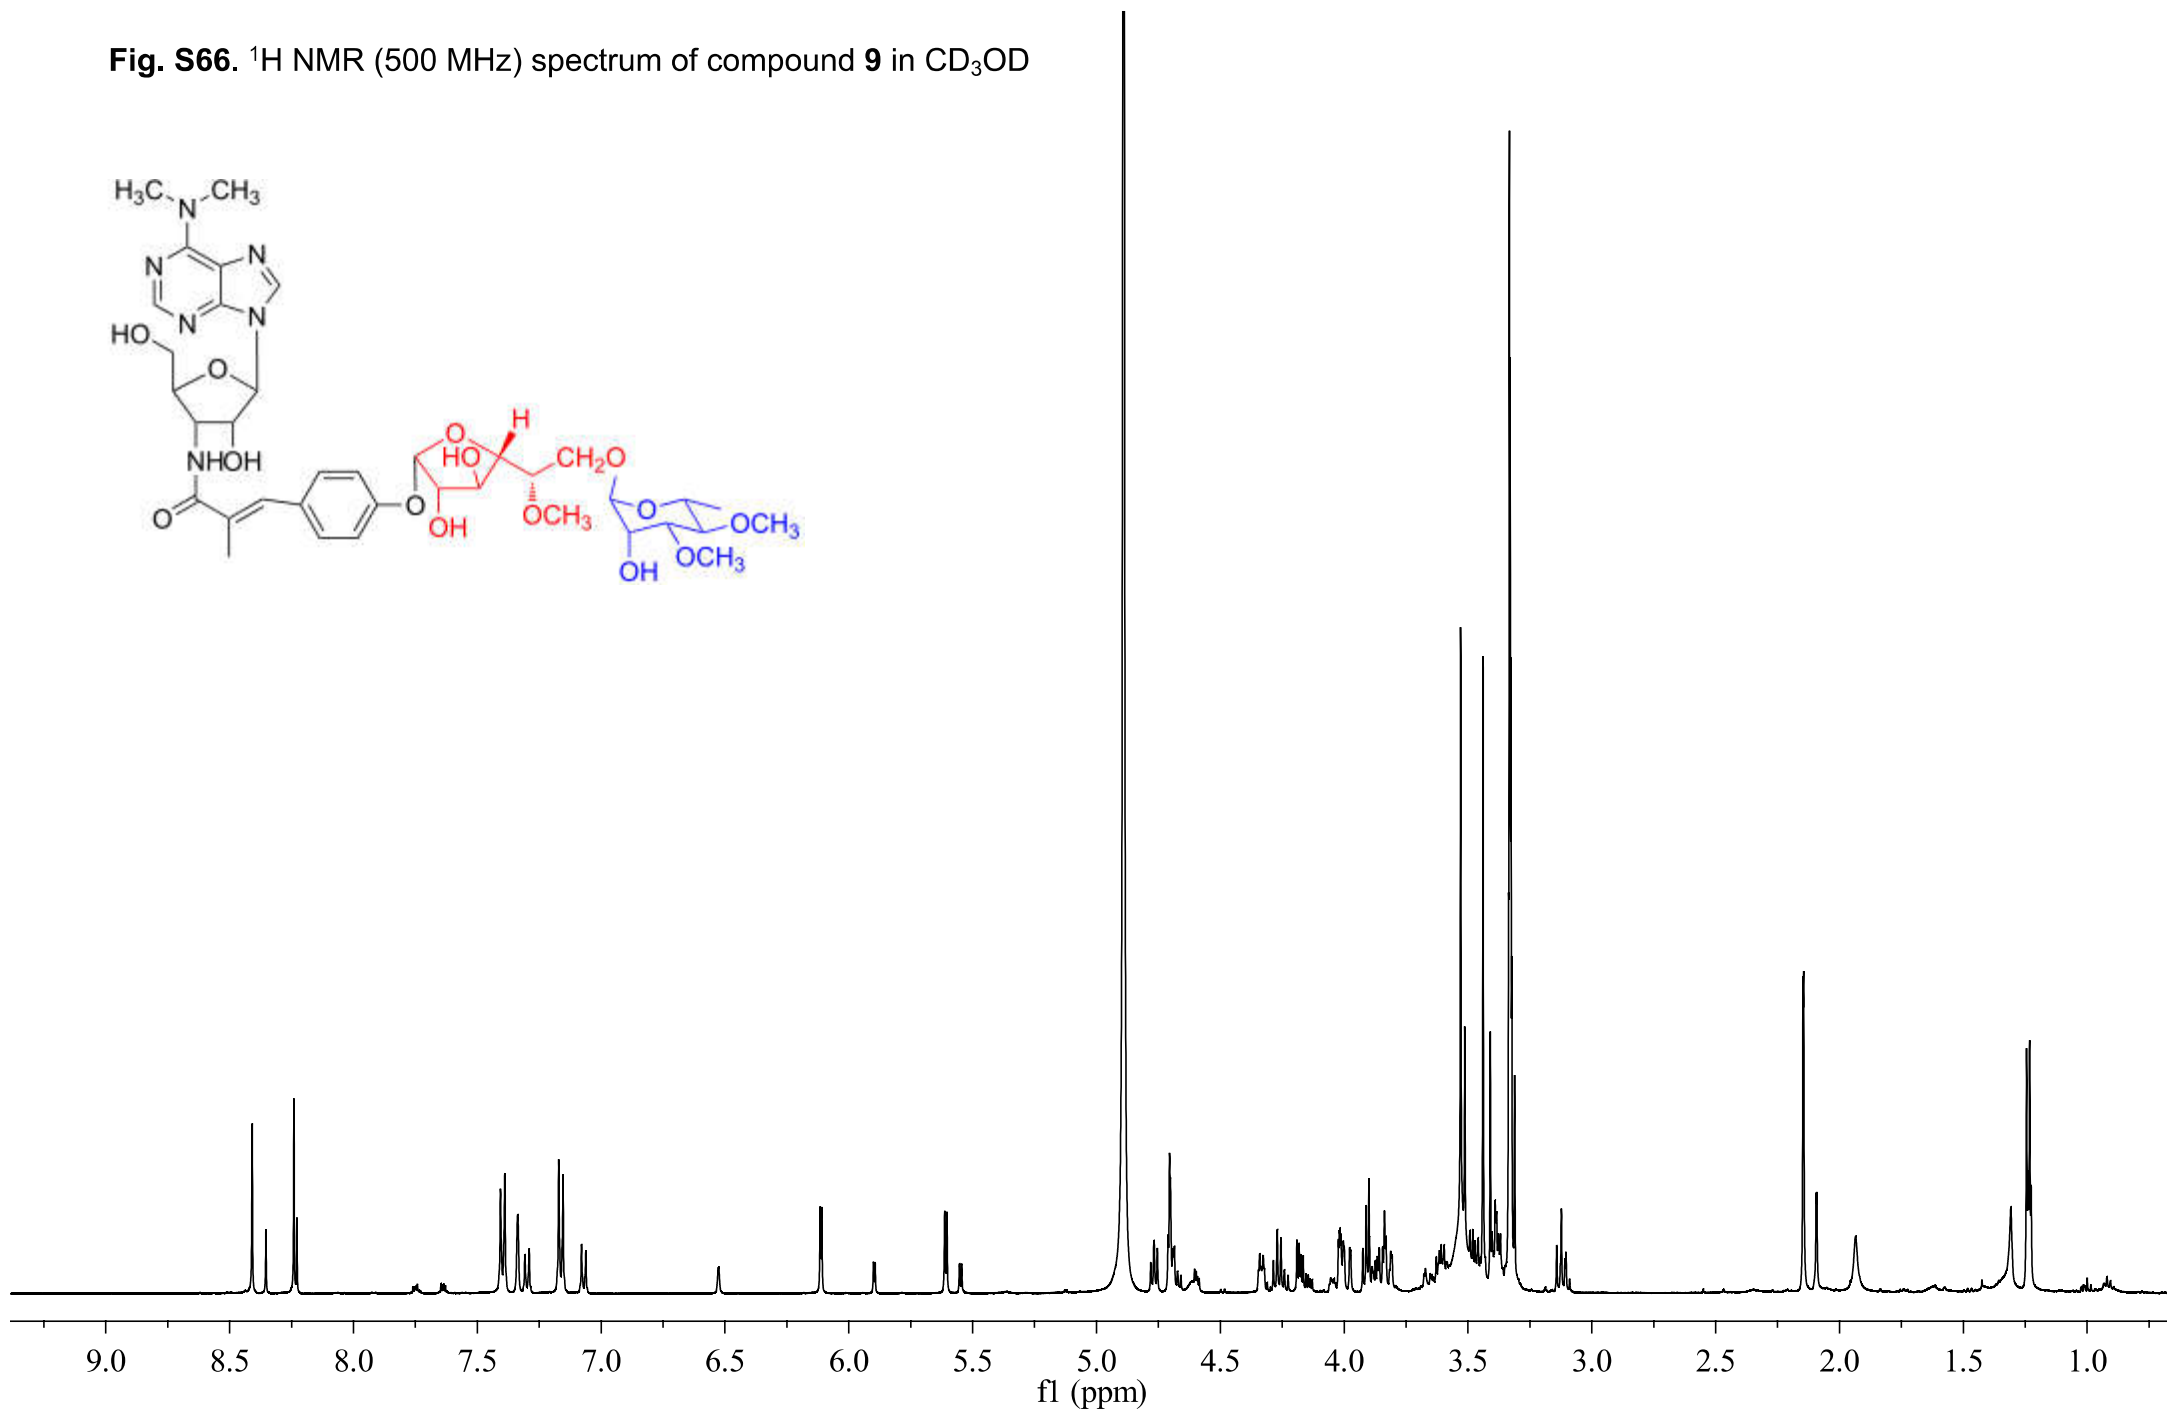



Fig. S67.  $^{13}\text{C}$  NMR (125 MHz) spectrum of compound **9** in  $\text{CD}_3\text{OD}$

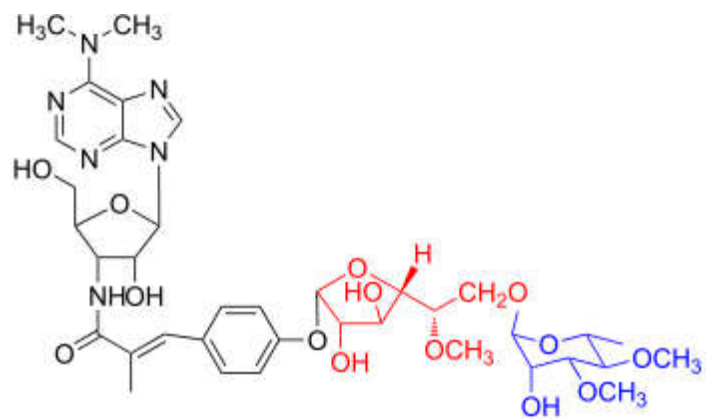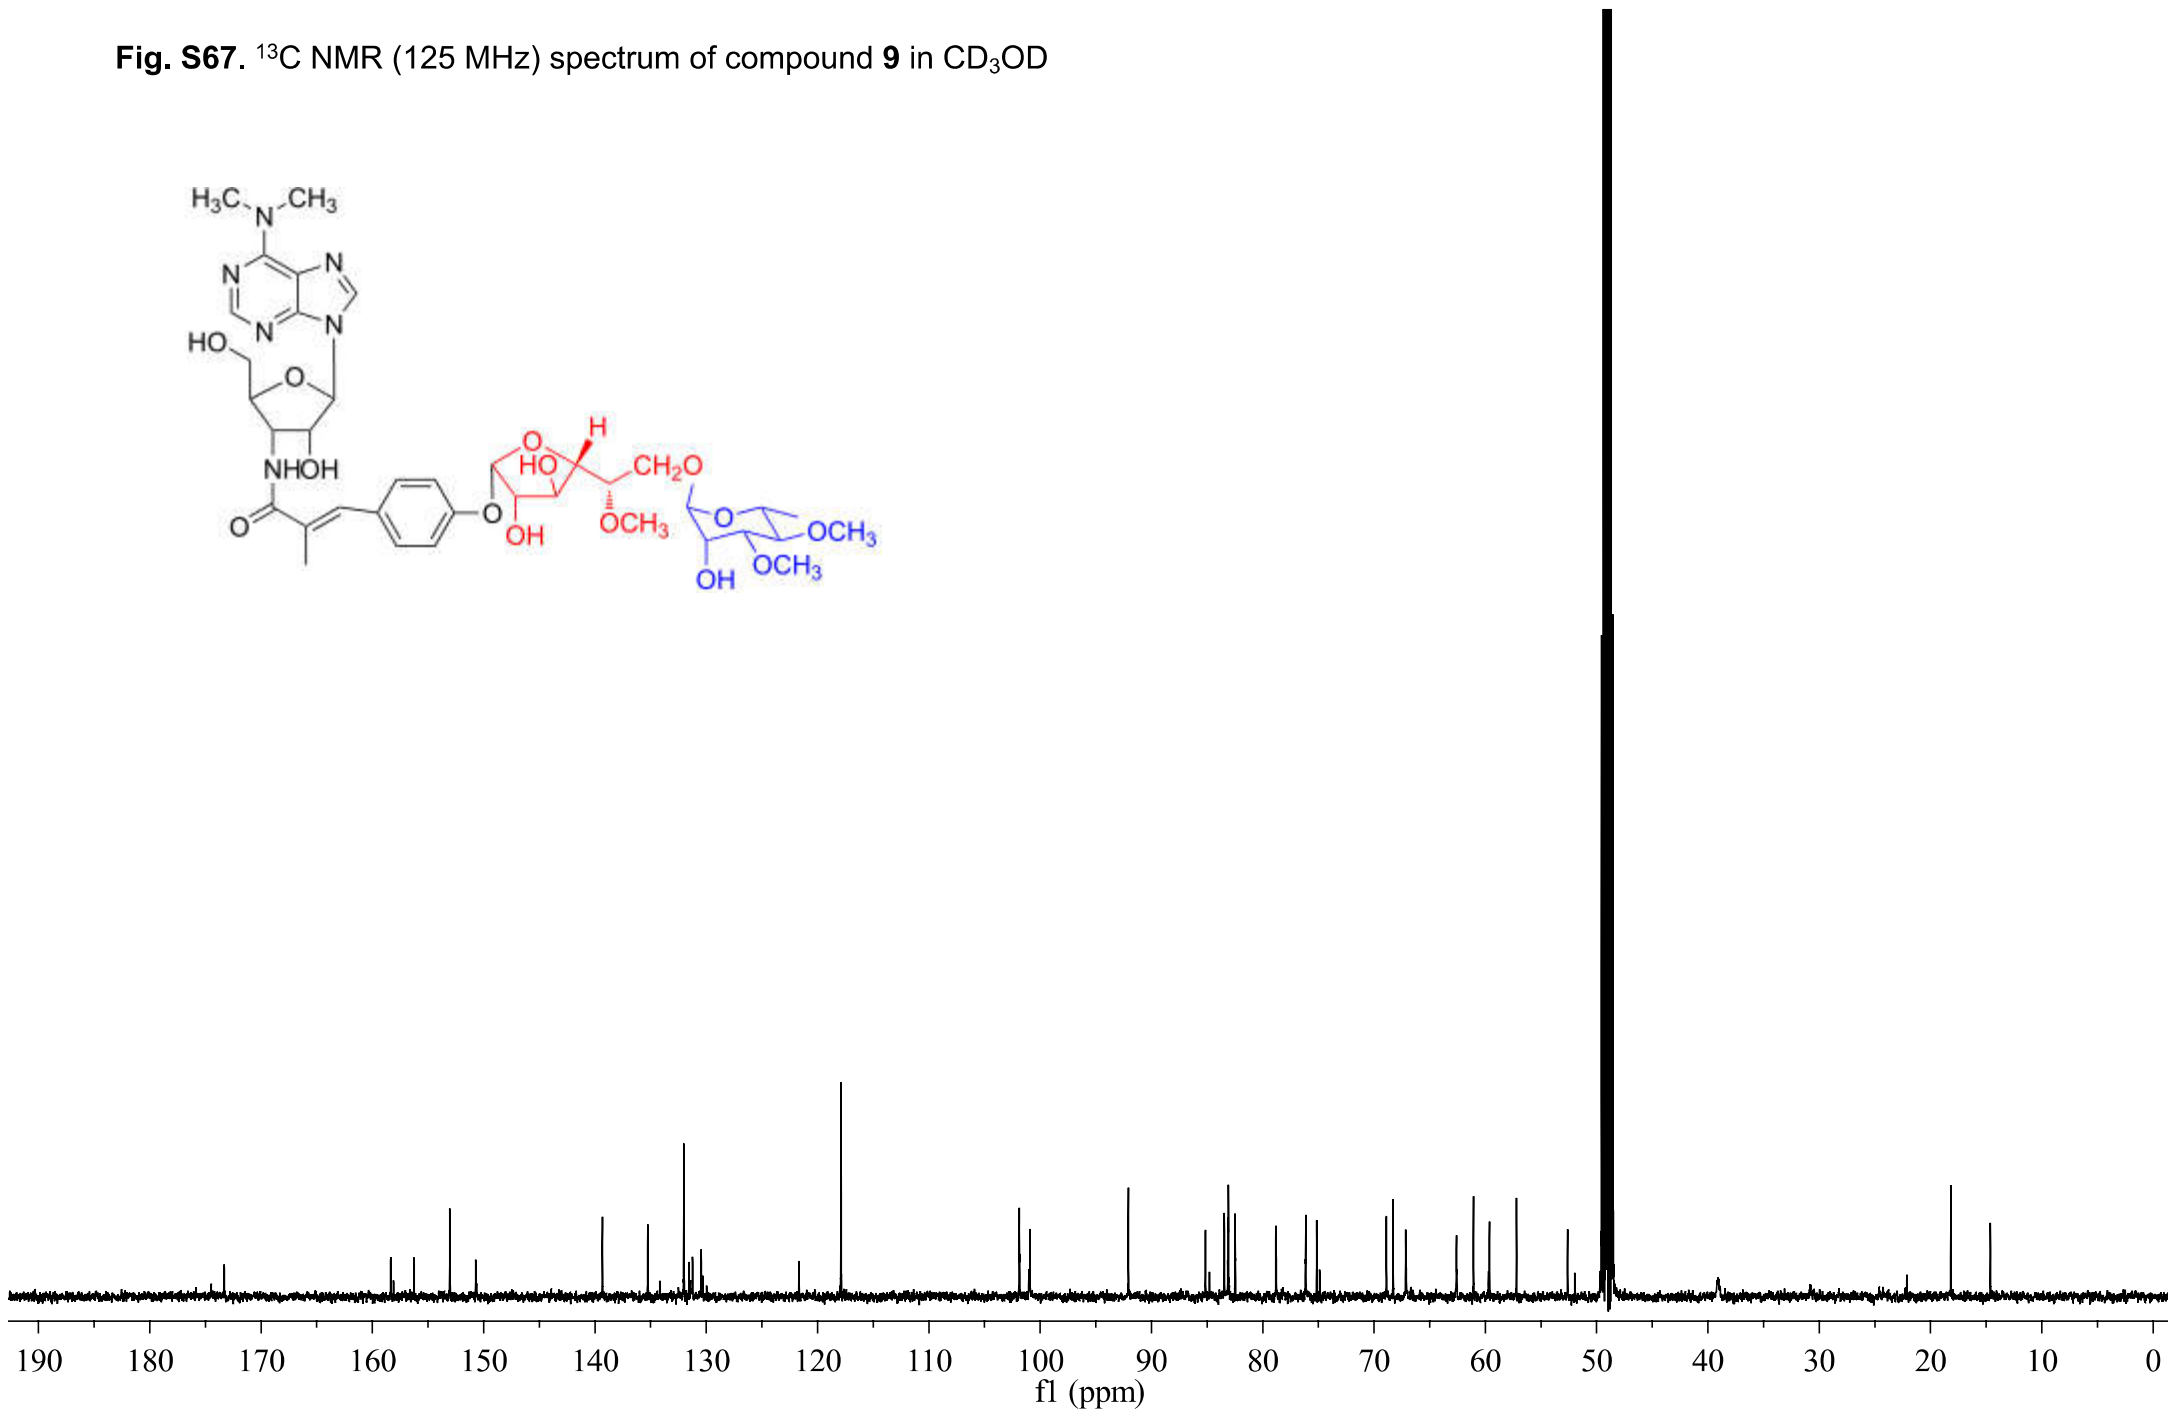

Fig. S68. HSQC spectrum of compound **9** in CD<sub>3</sub>OD

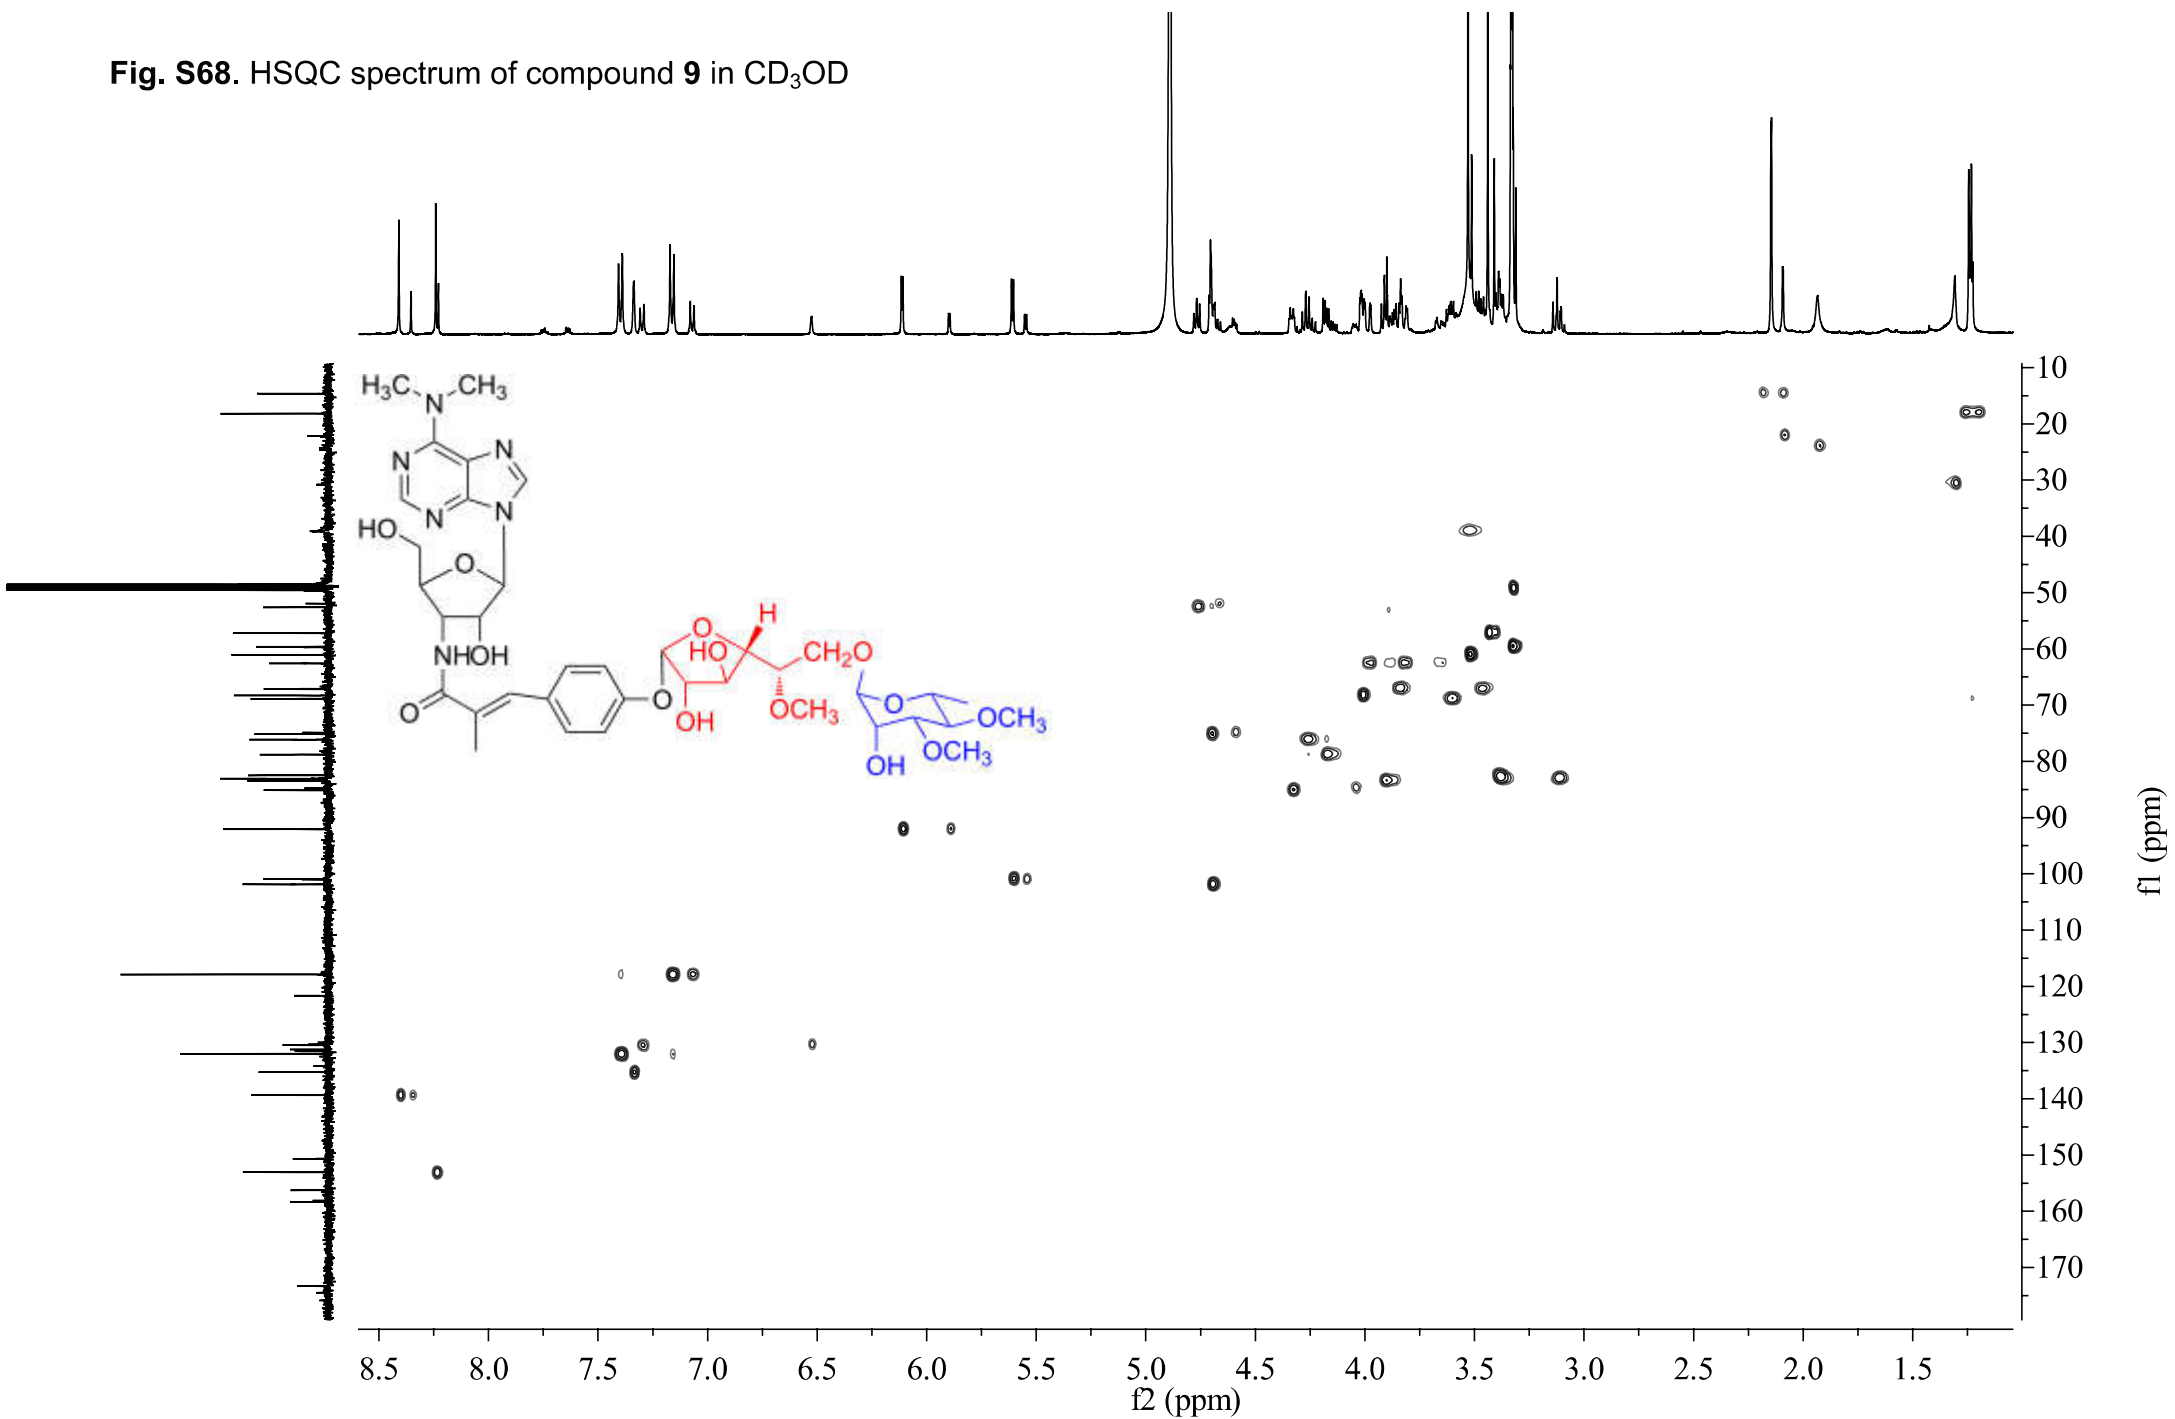

Fig. S69.  $^1\text{H}$ - $^1\text{H}$  COSY spectrum of compound **9** in  $\text{CD}_3\text{OD}$

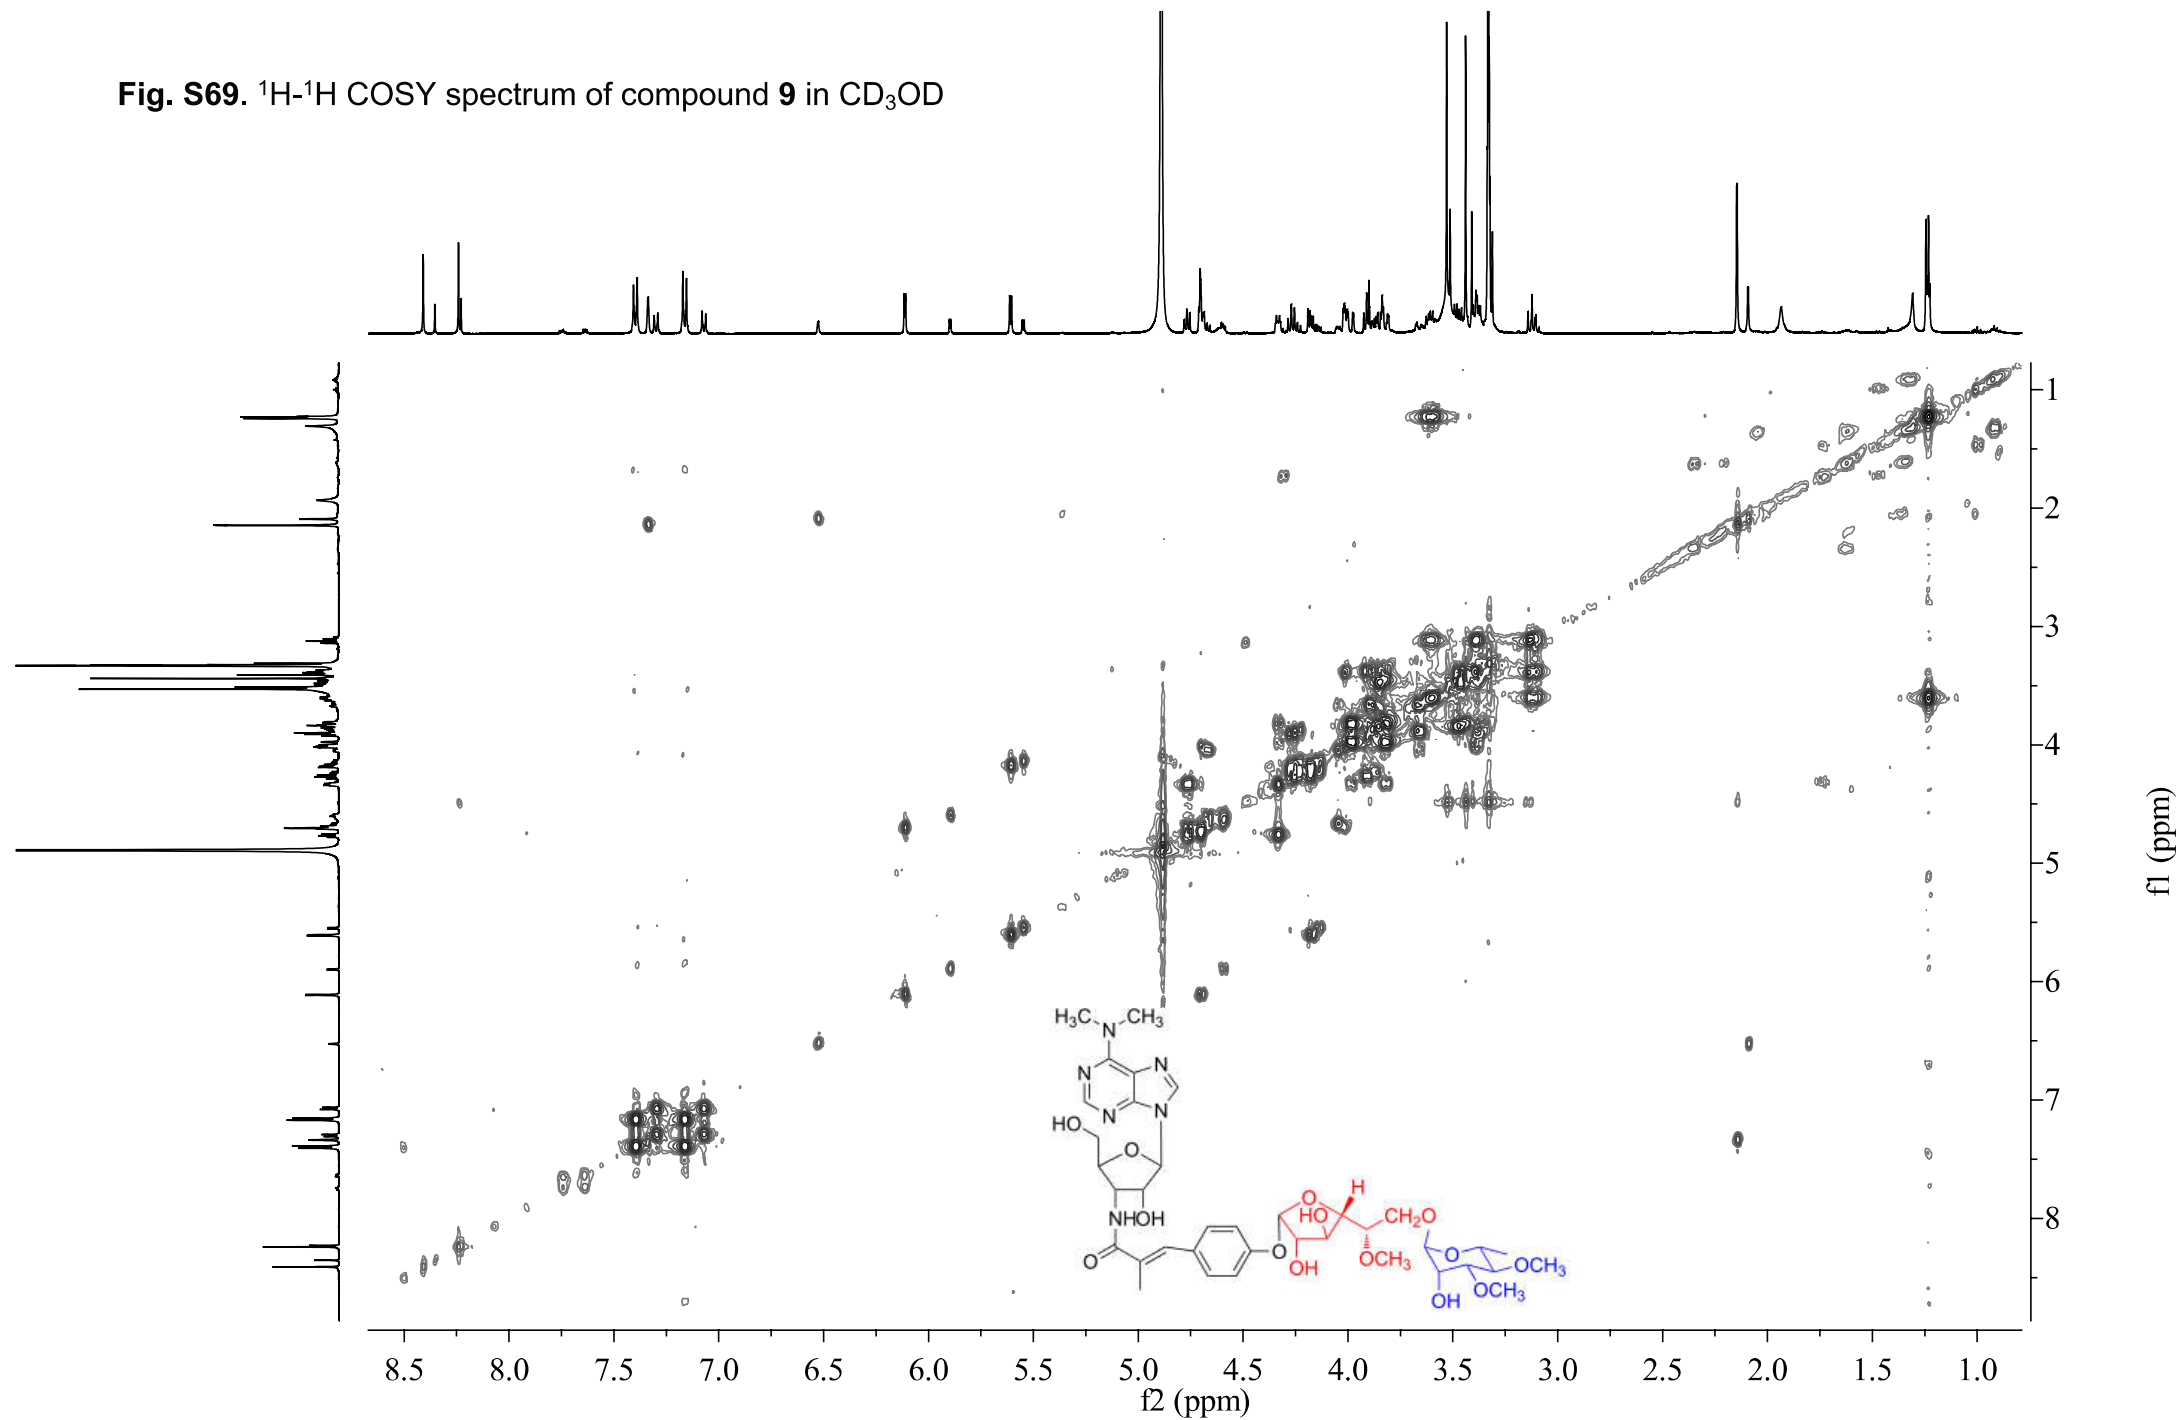

Fig. S70. HMBC spectrum of compound **9** in CD<sub>3</sub>OD

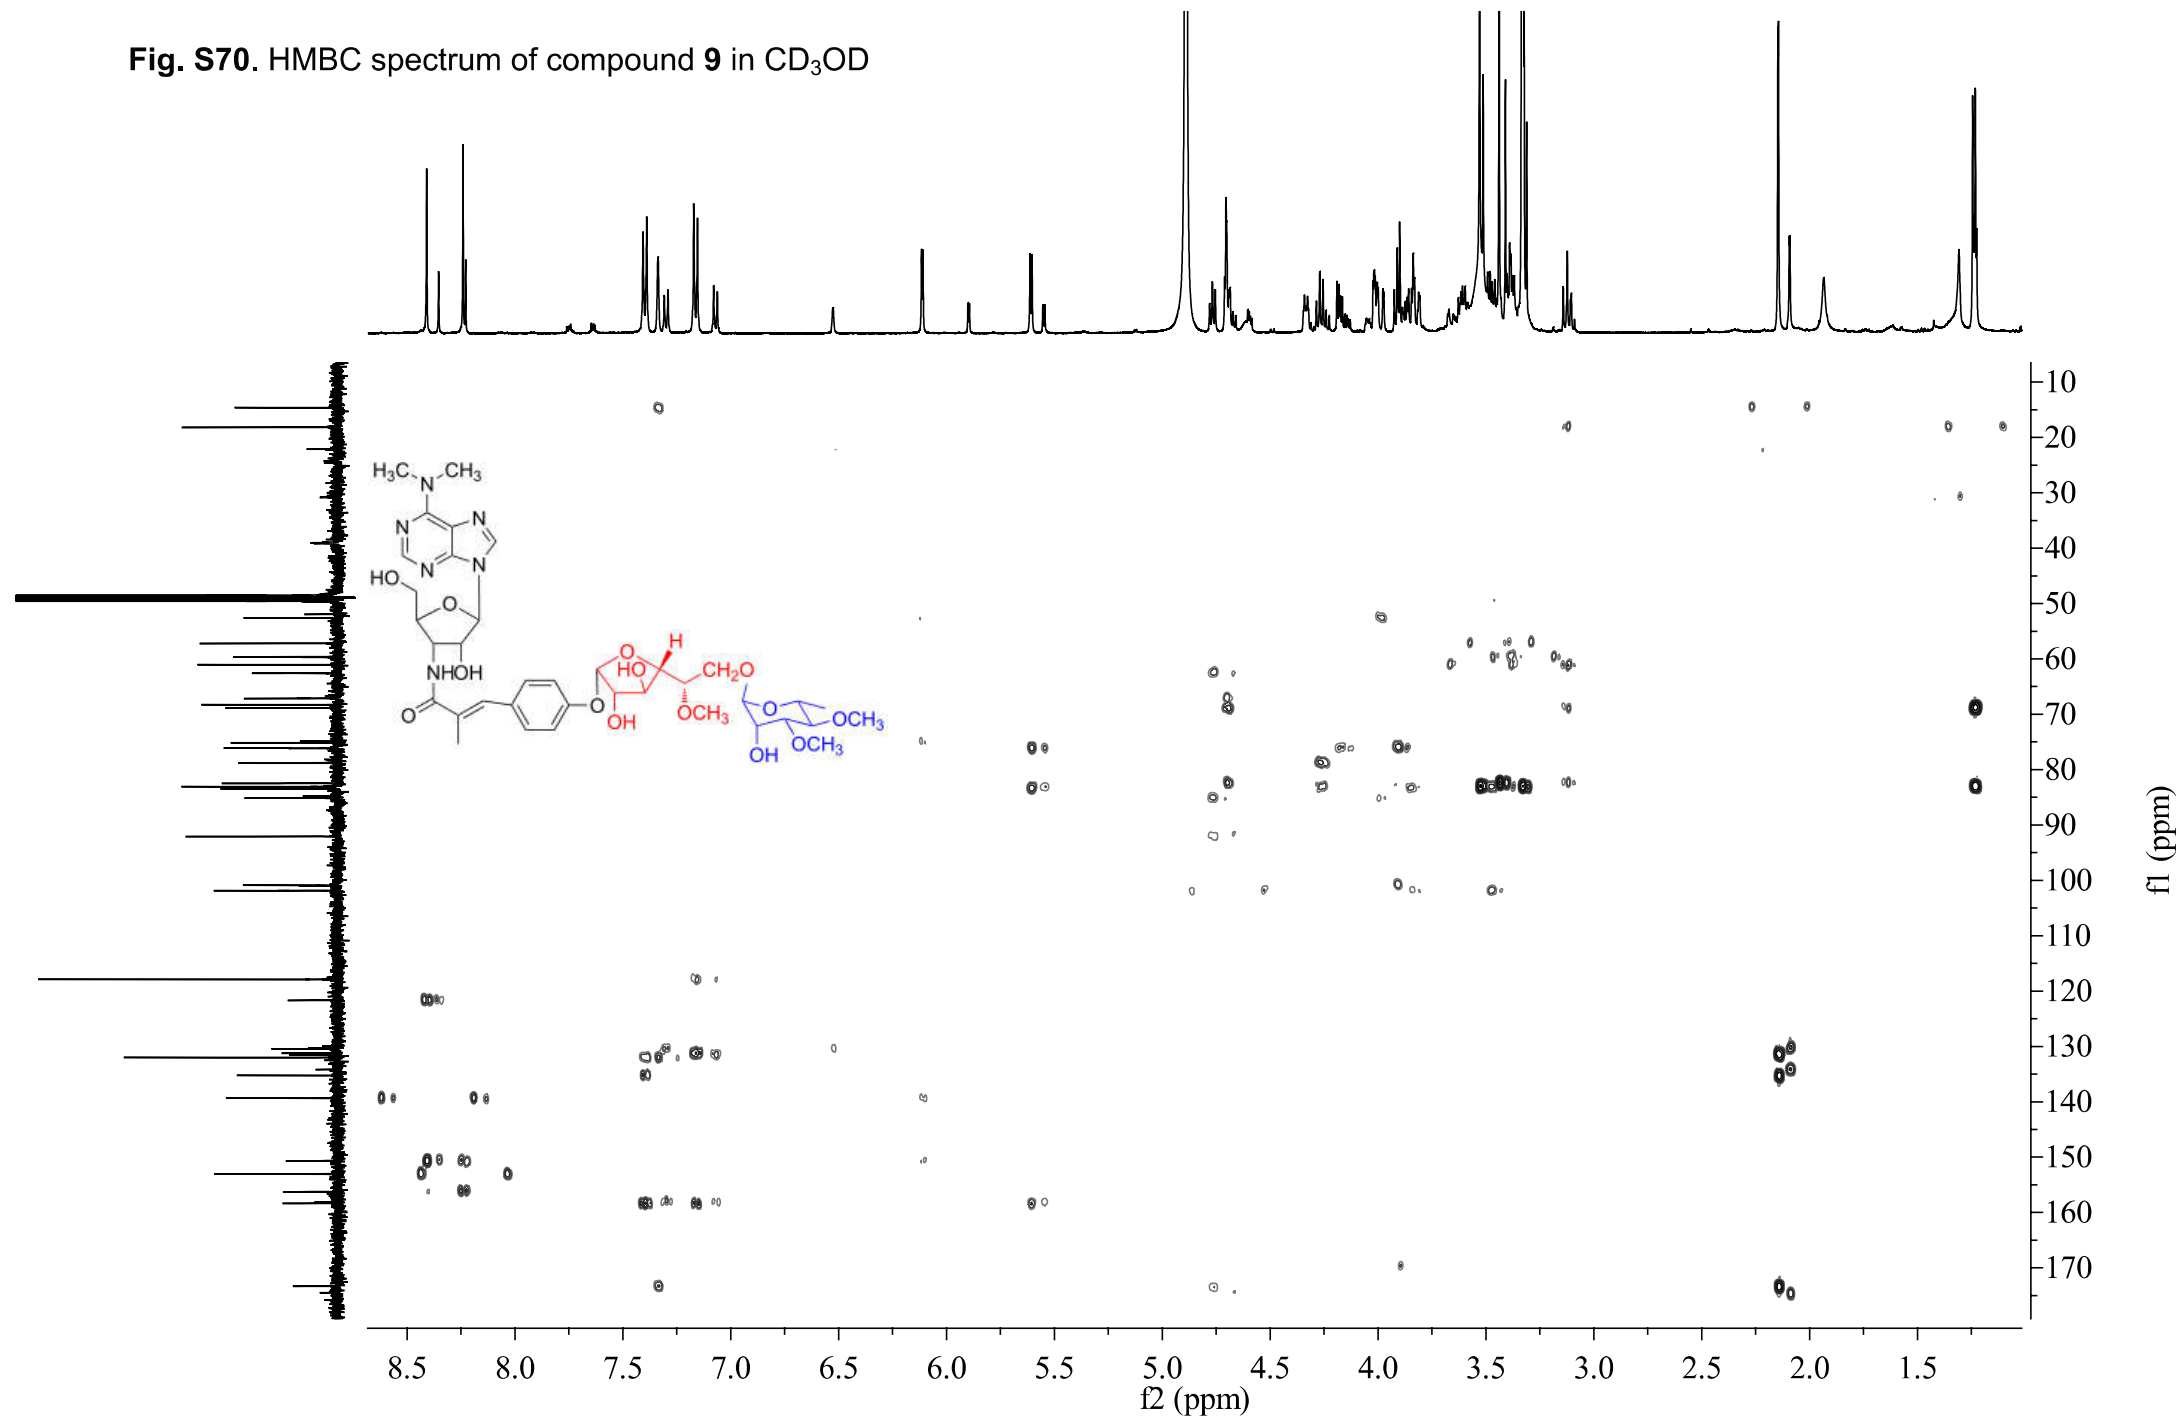

Fig. S71.  $^1\text{H}$  NMR (500 MHz) spectrum of compound **10** in  $\text{CD}_3\text{OD}$

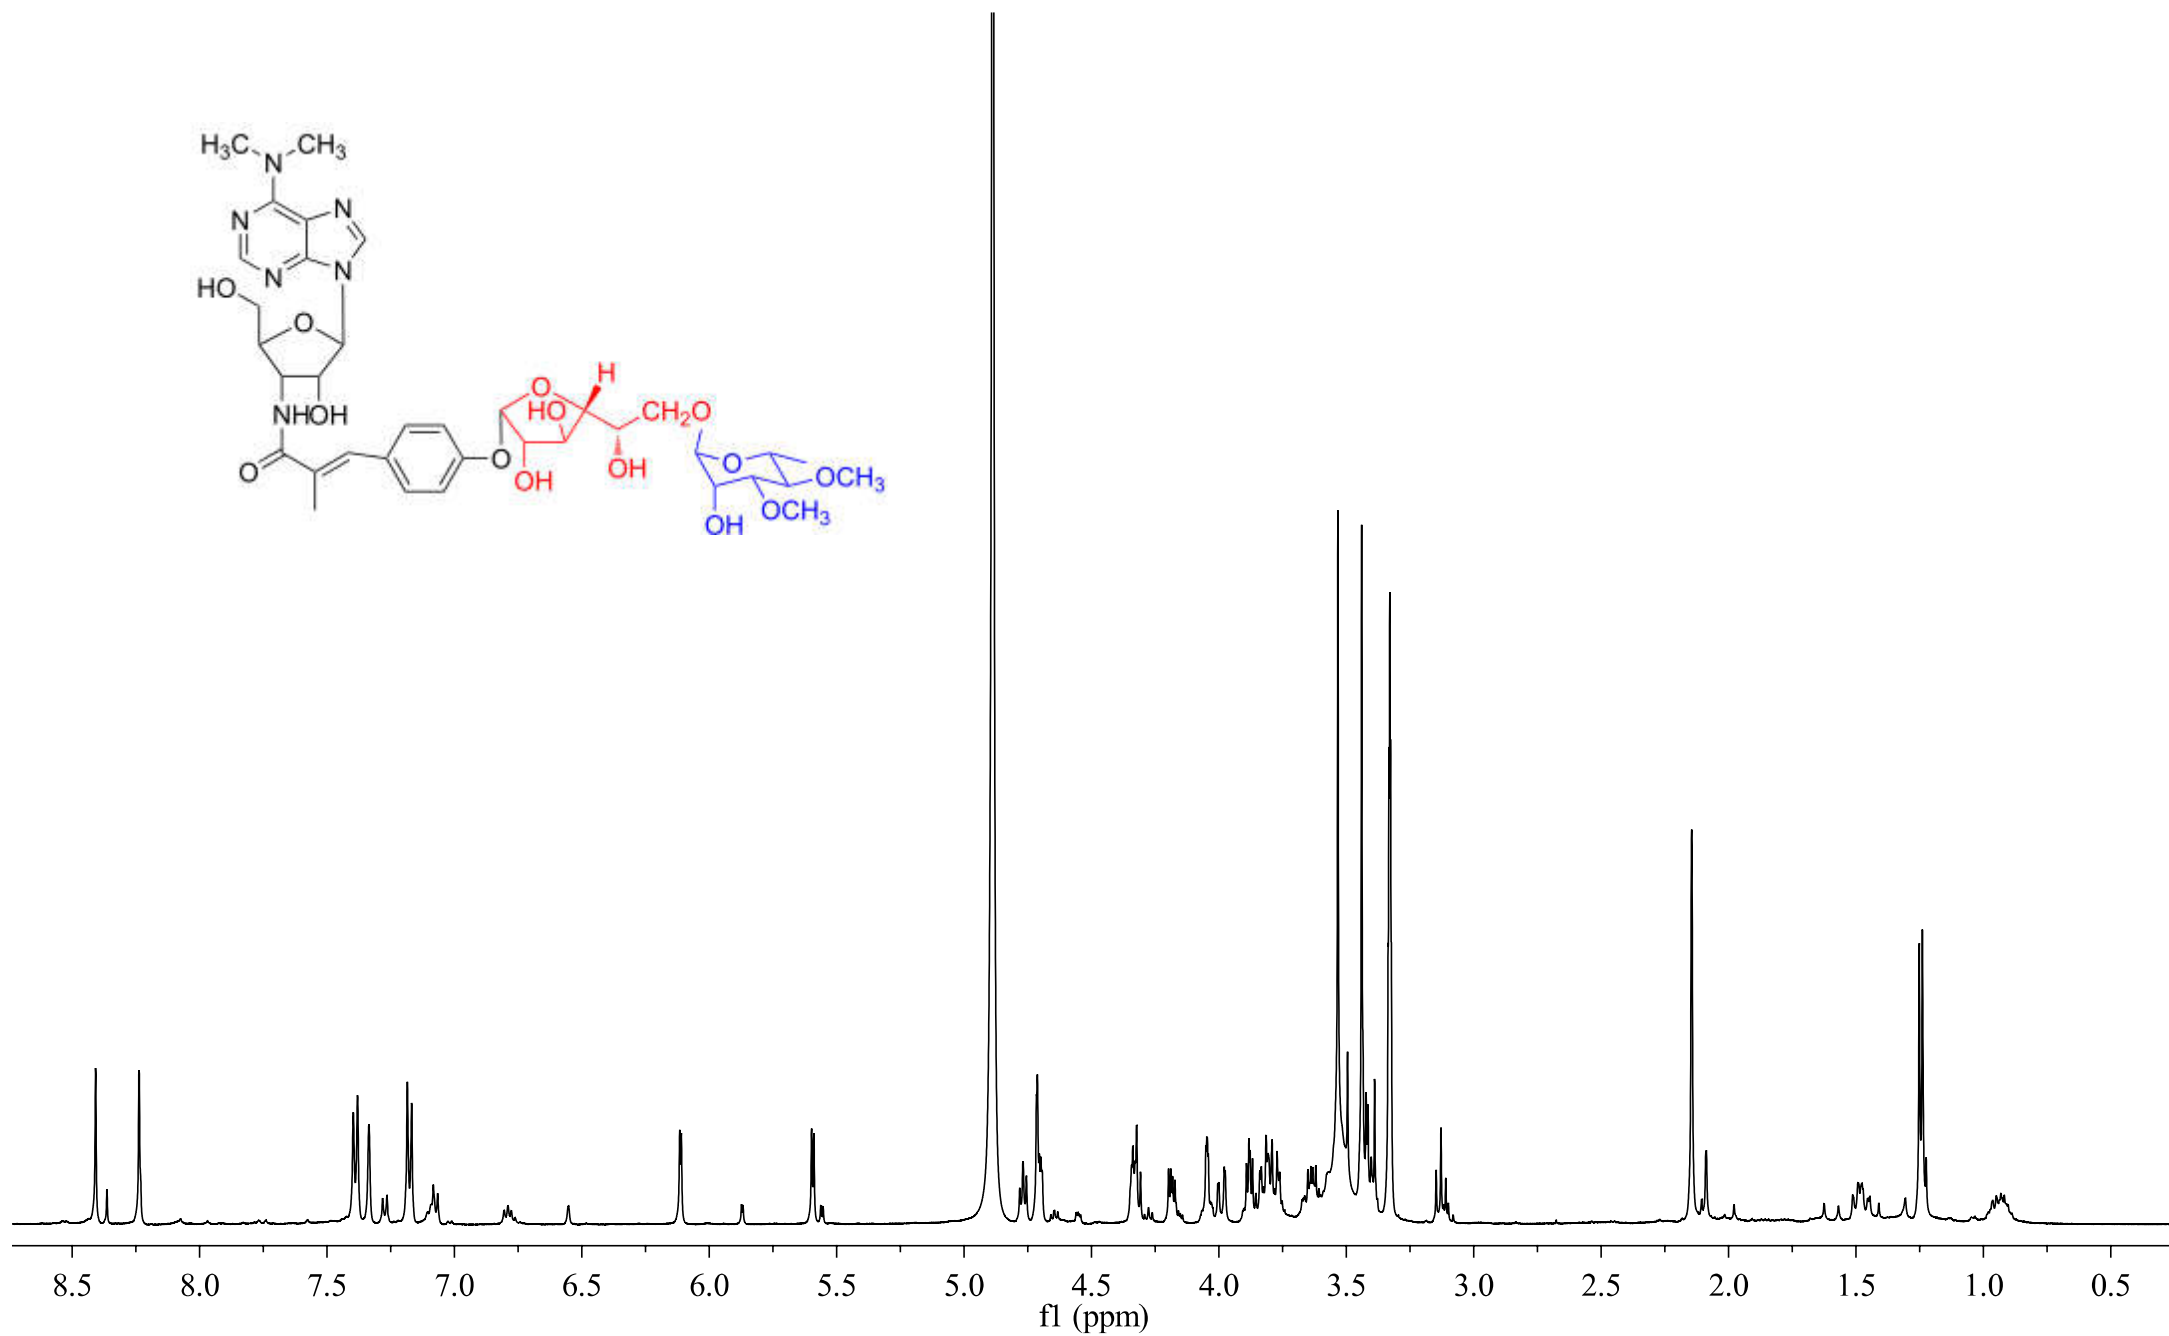

**Fig. S72.**  $^{13}\text{C}$  NMR (125 MHz) spectrum of compound **10** in  $\text{CD}_3\text{OD}$

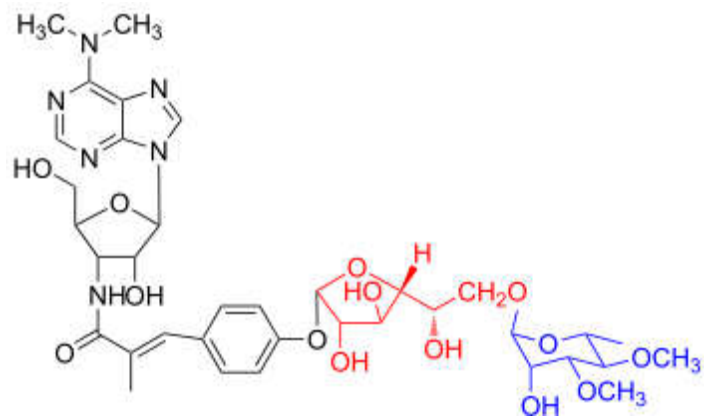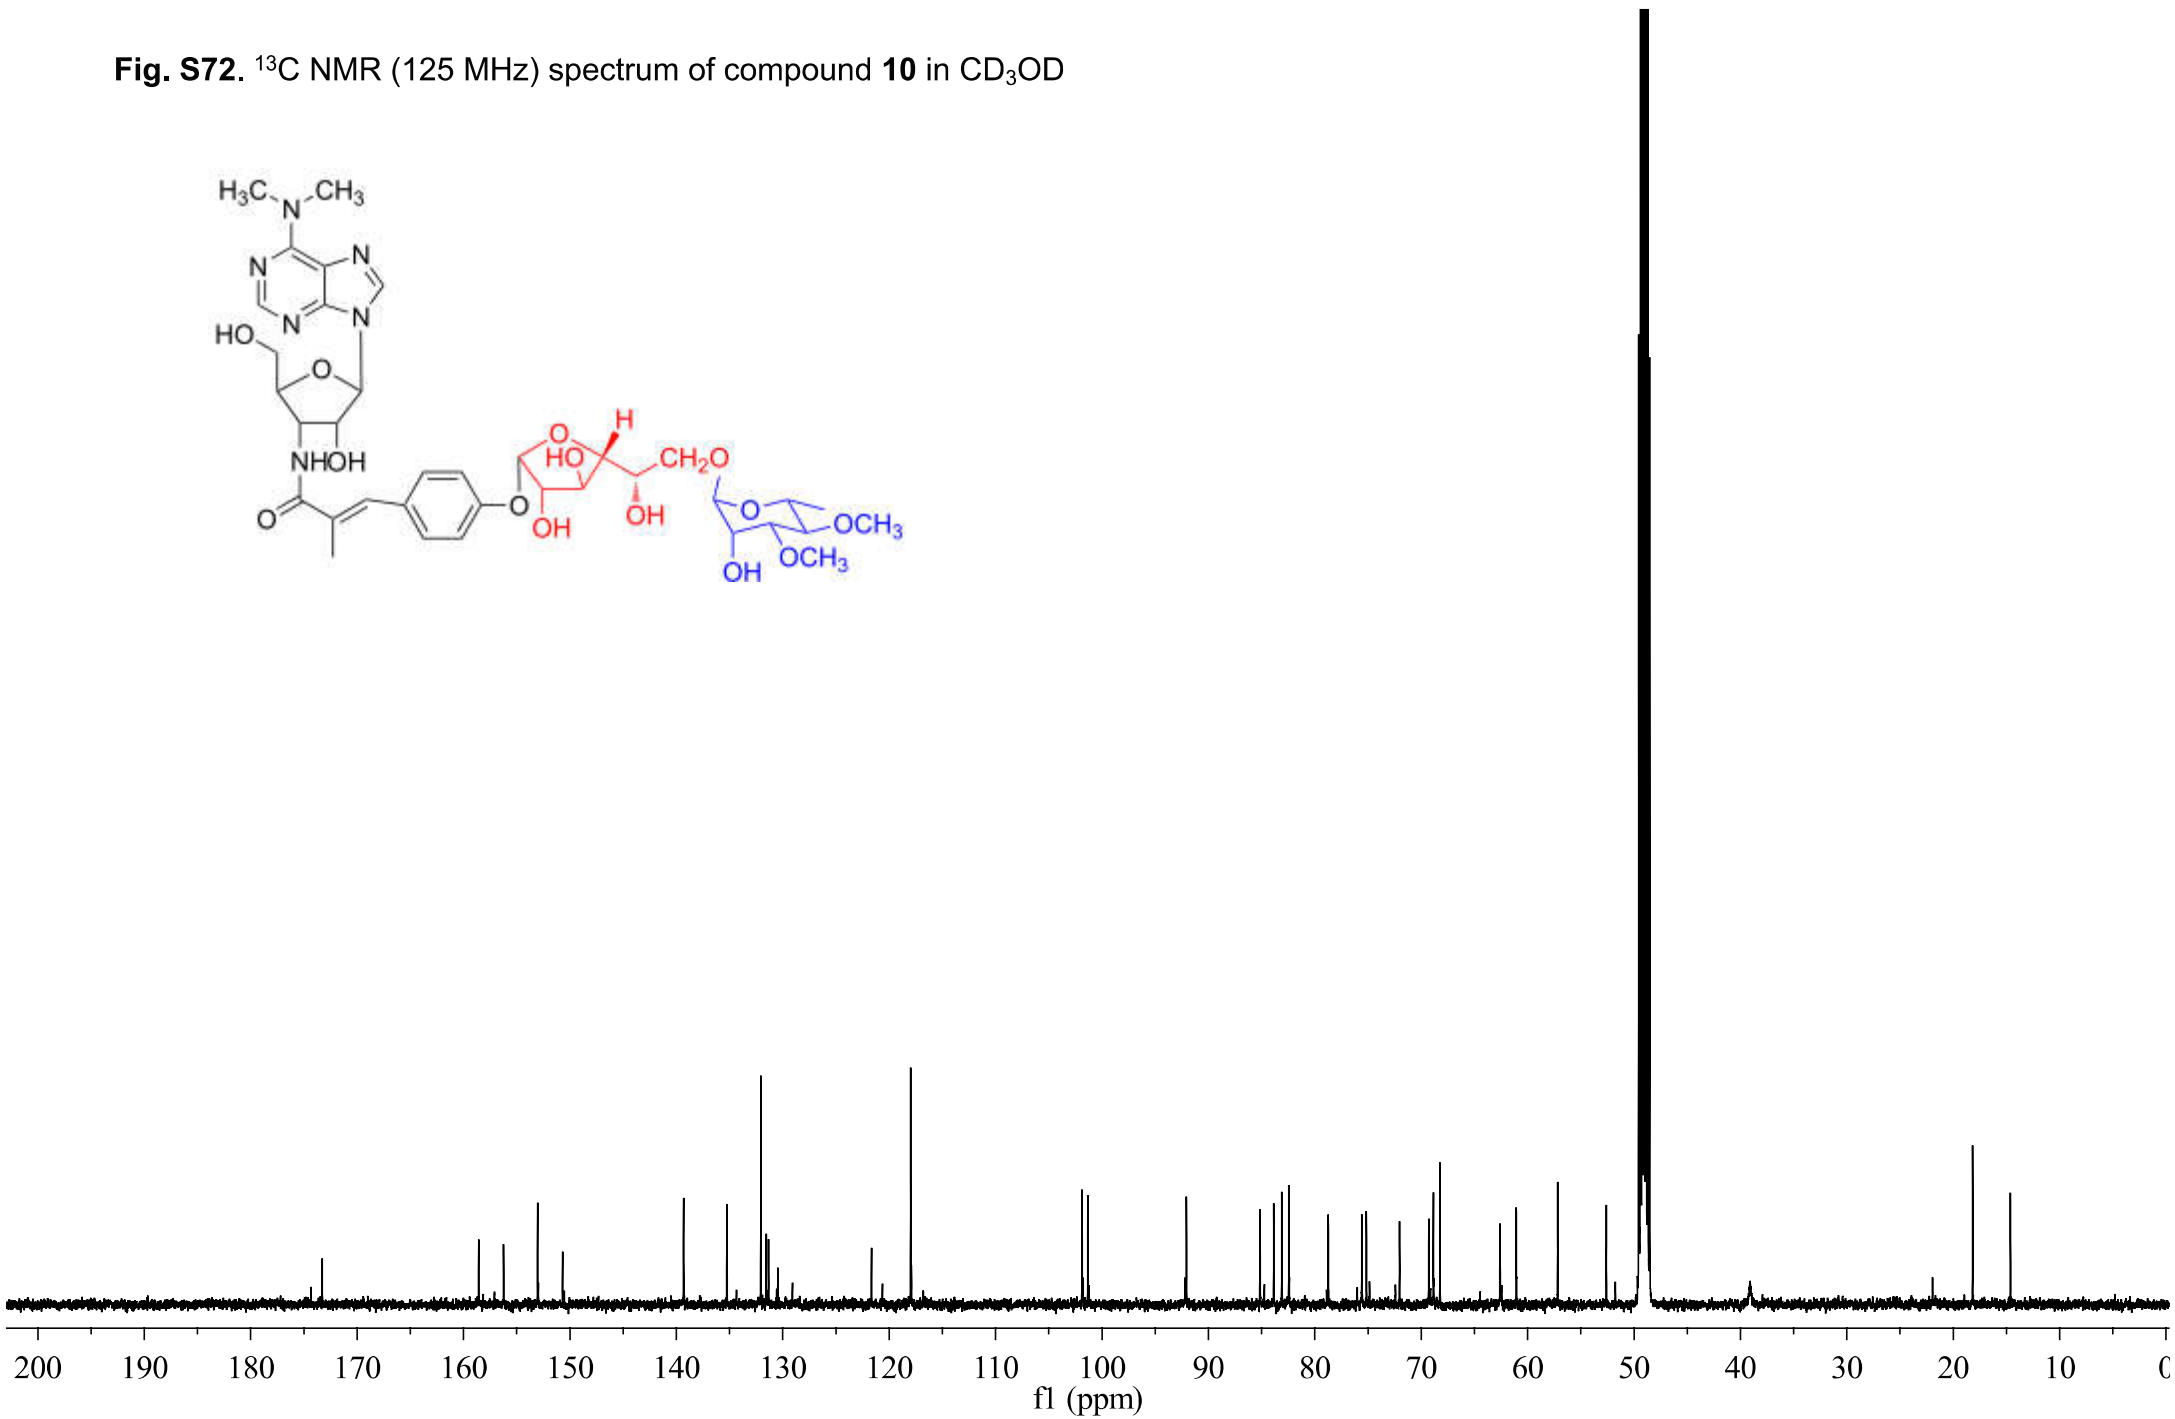

Fig. S73. HSQC spectrum of compound **10** in CD<sub>3</sub>OD

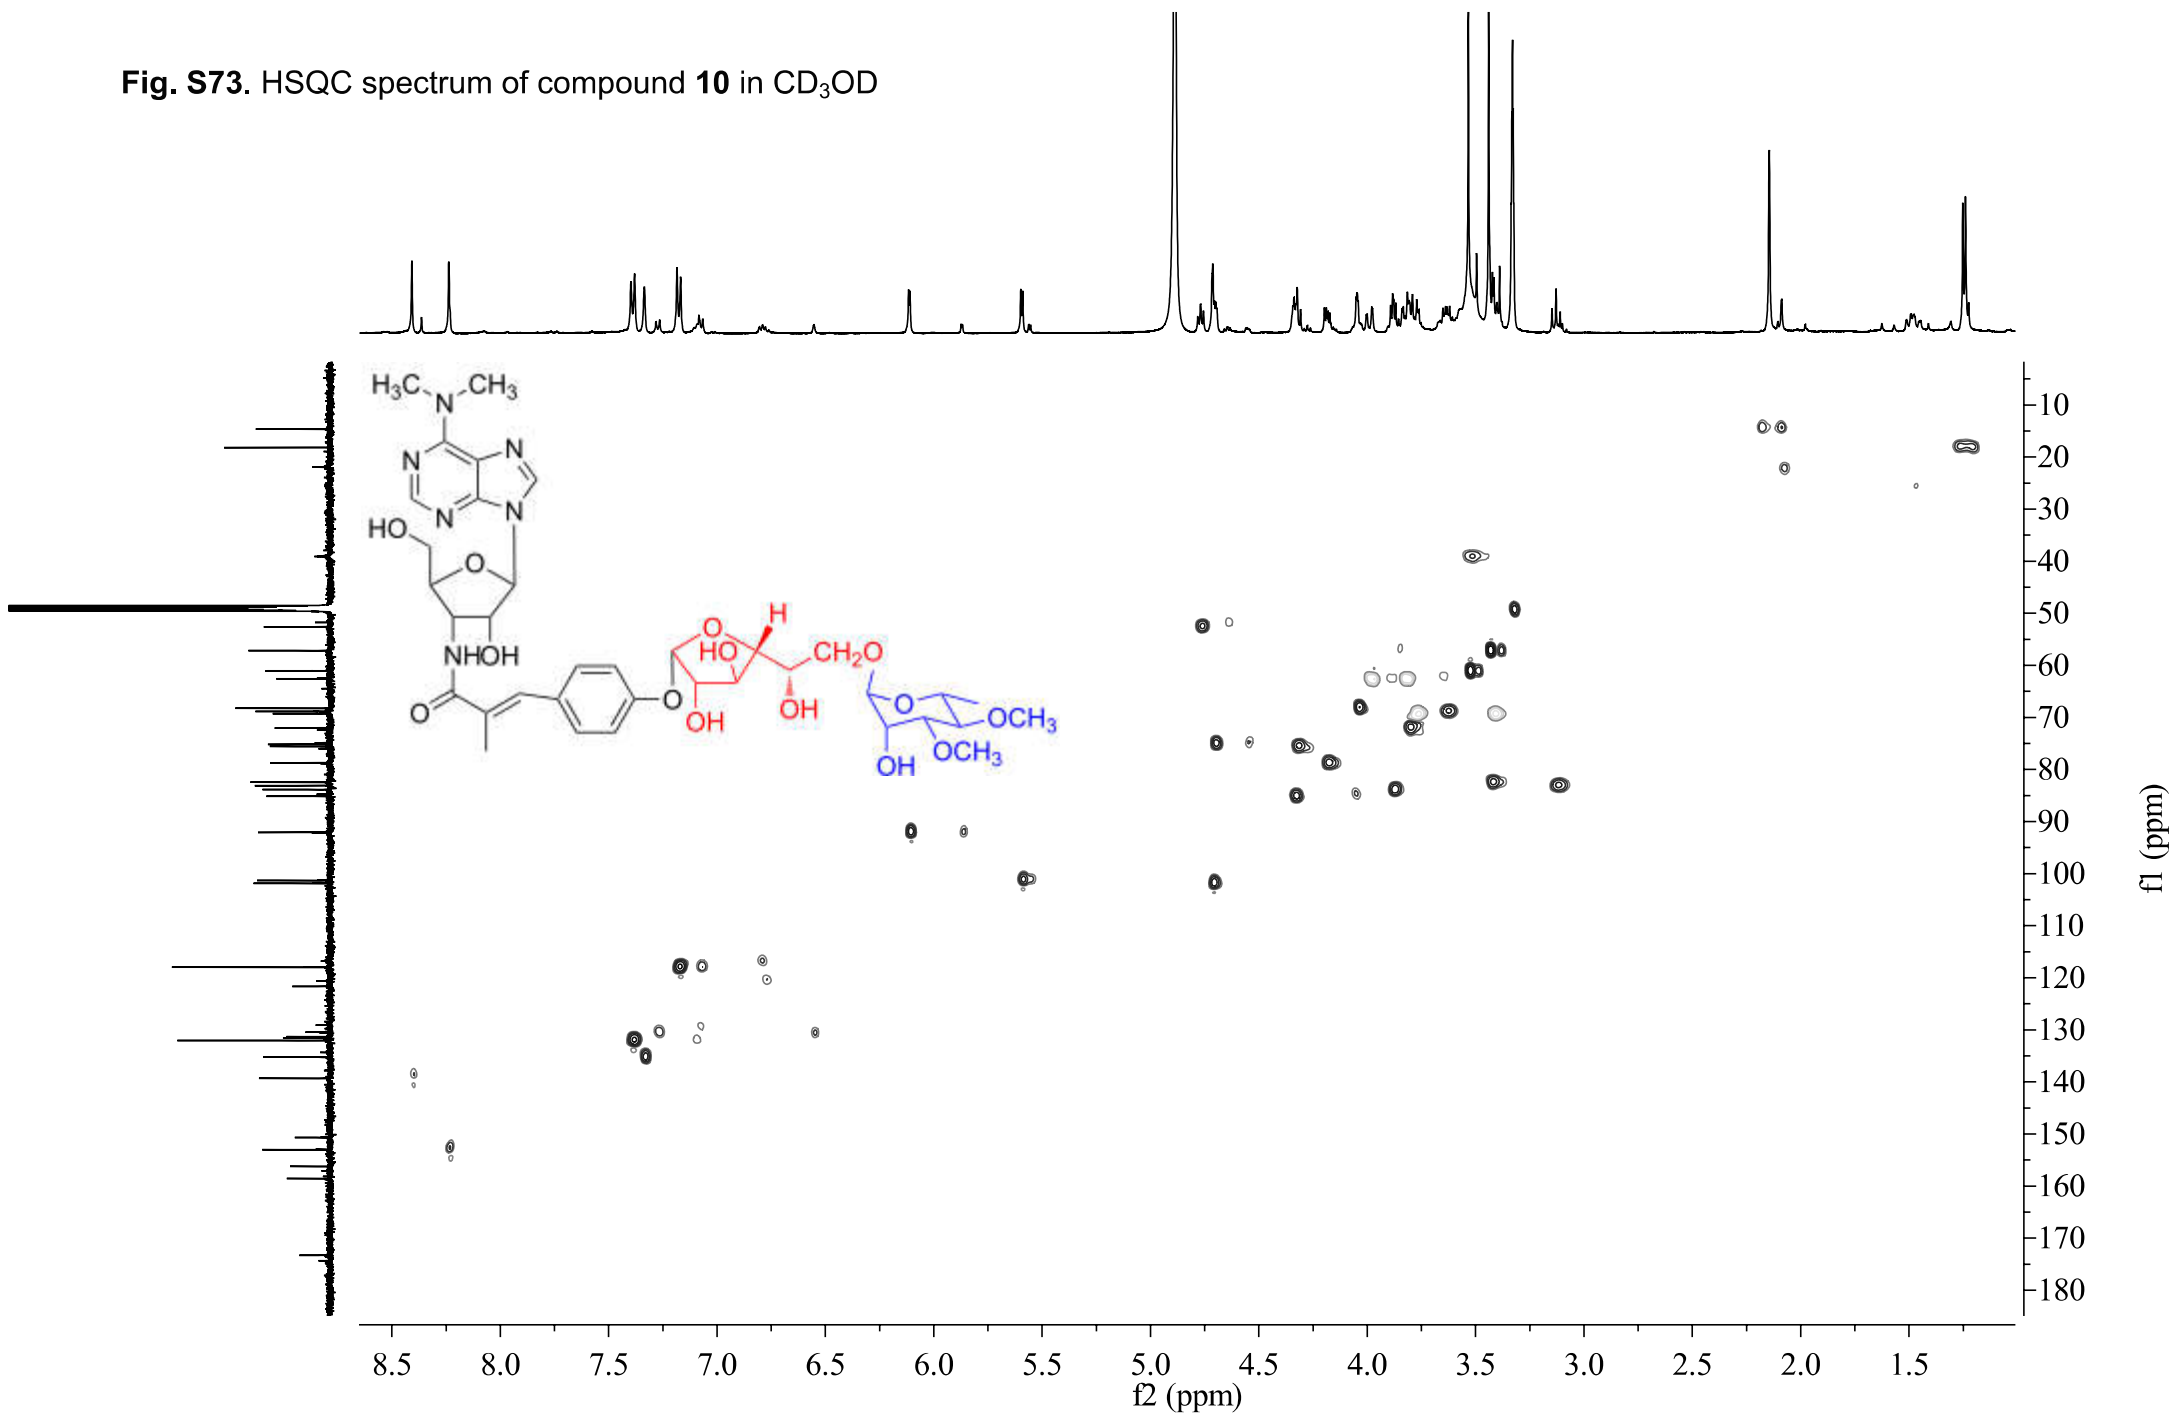

Fig. S74.  $^1\text{H}$ - $^1\text{H}$  COSY spectrum of compound **10** in  $\text{CD}_3\text{OD}$

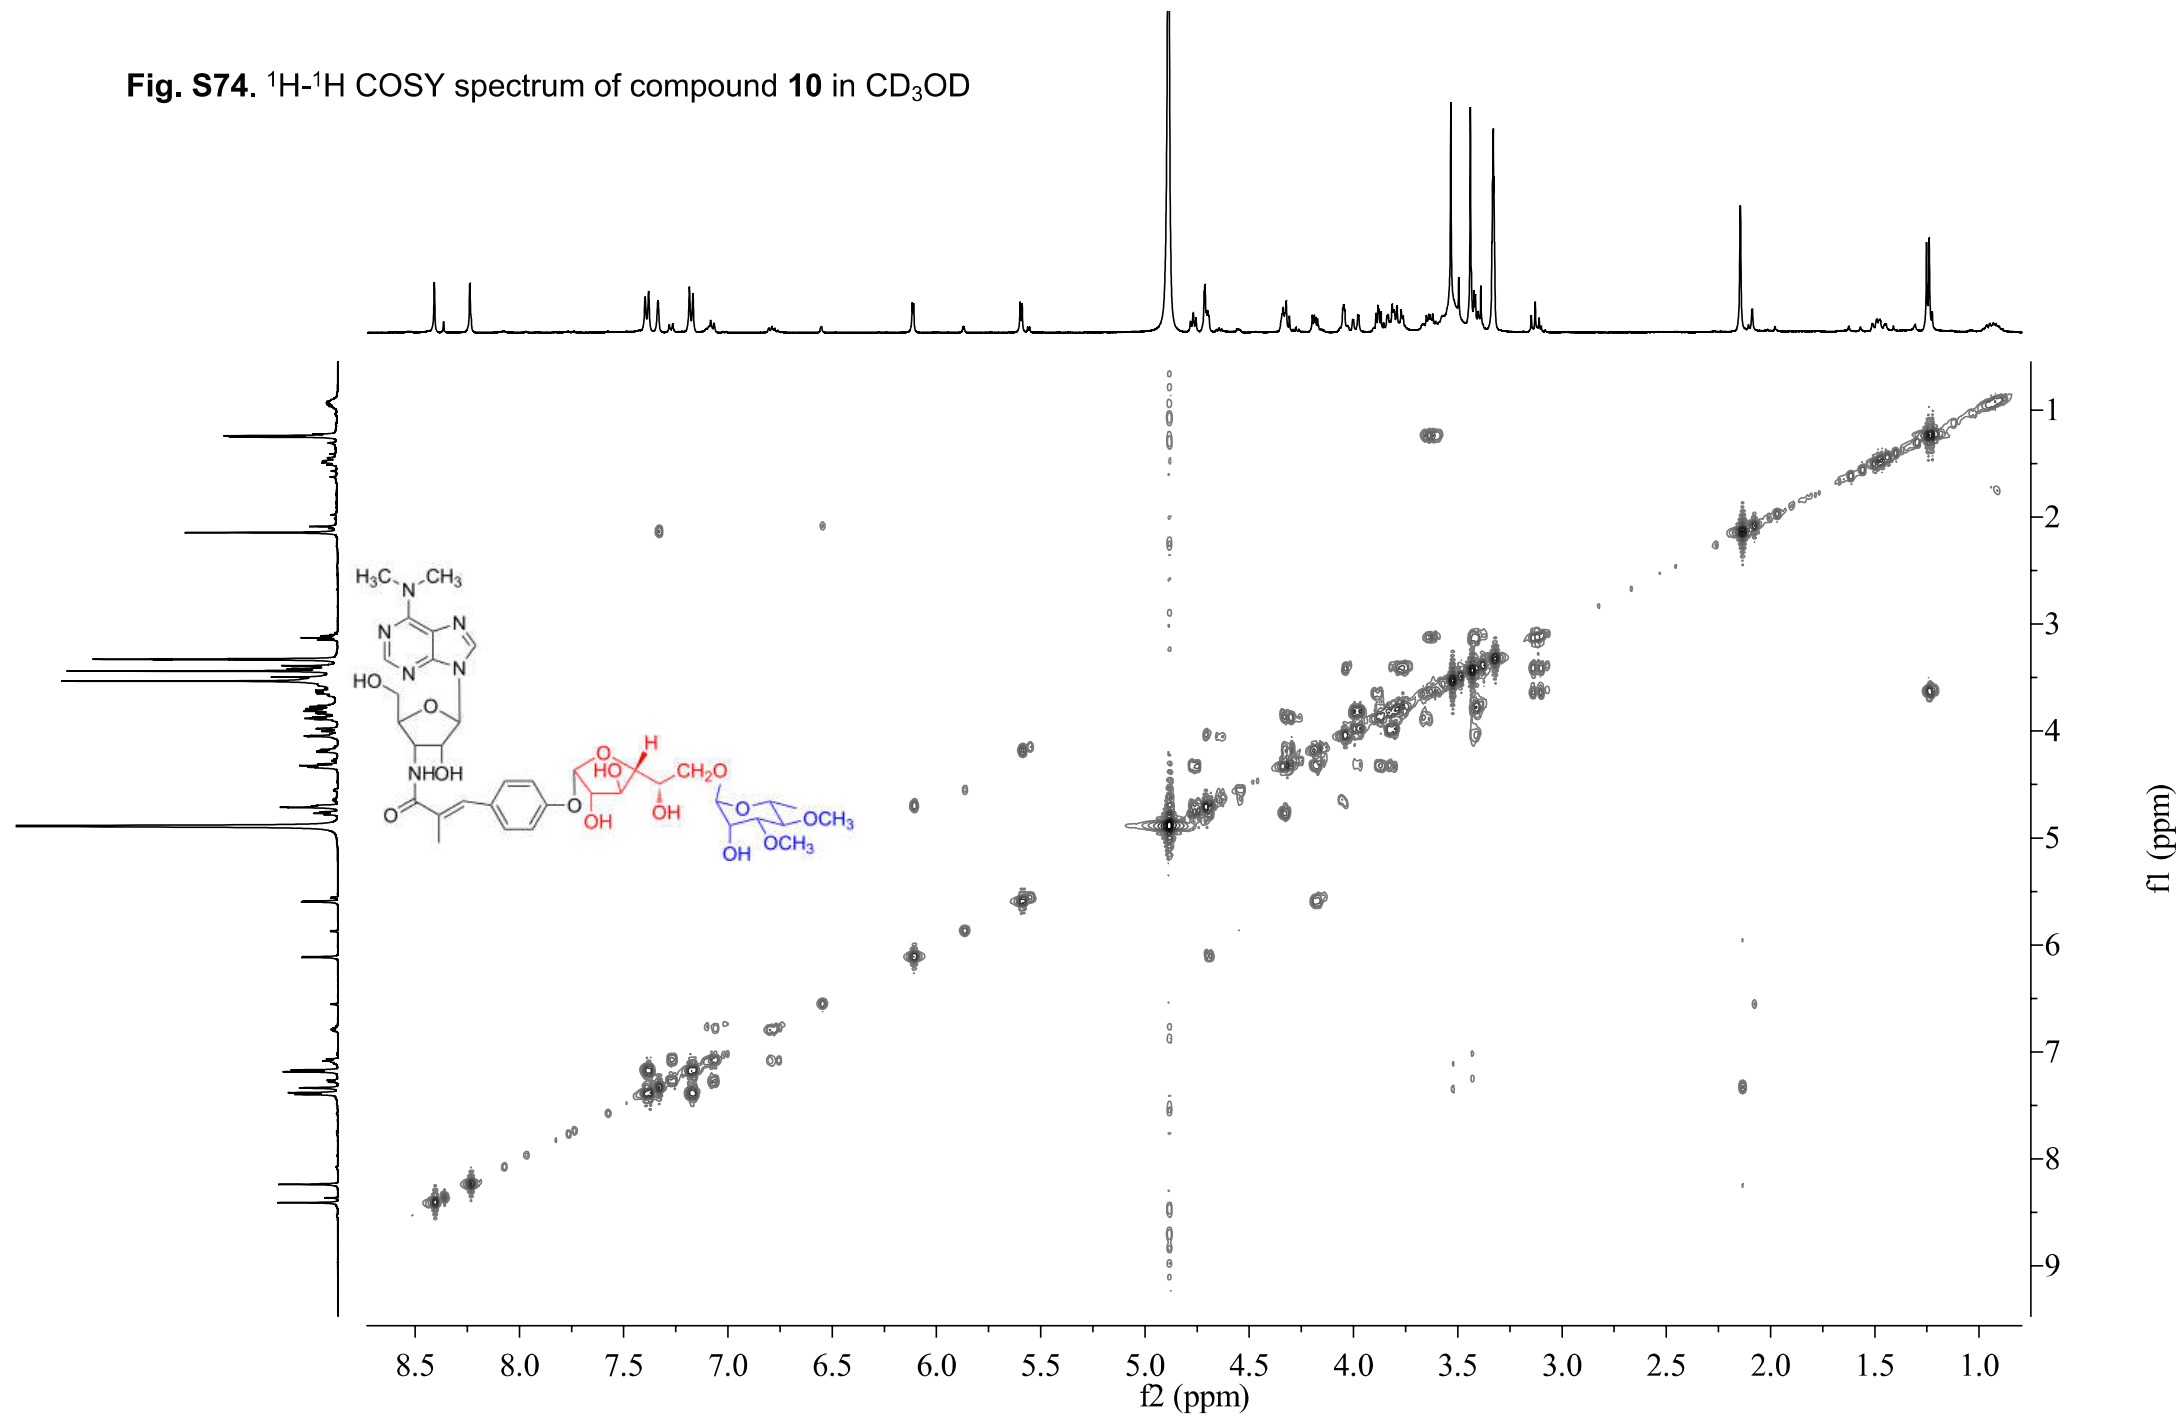



Fig. S75. HMBC spectrum of compound **10** in CD<sub>3</sub>OD

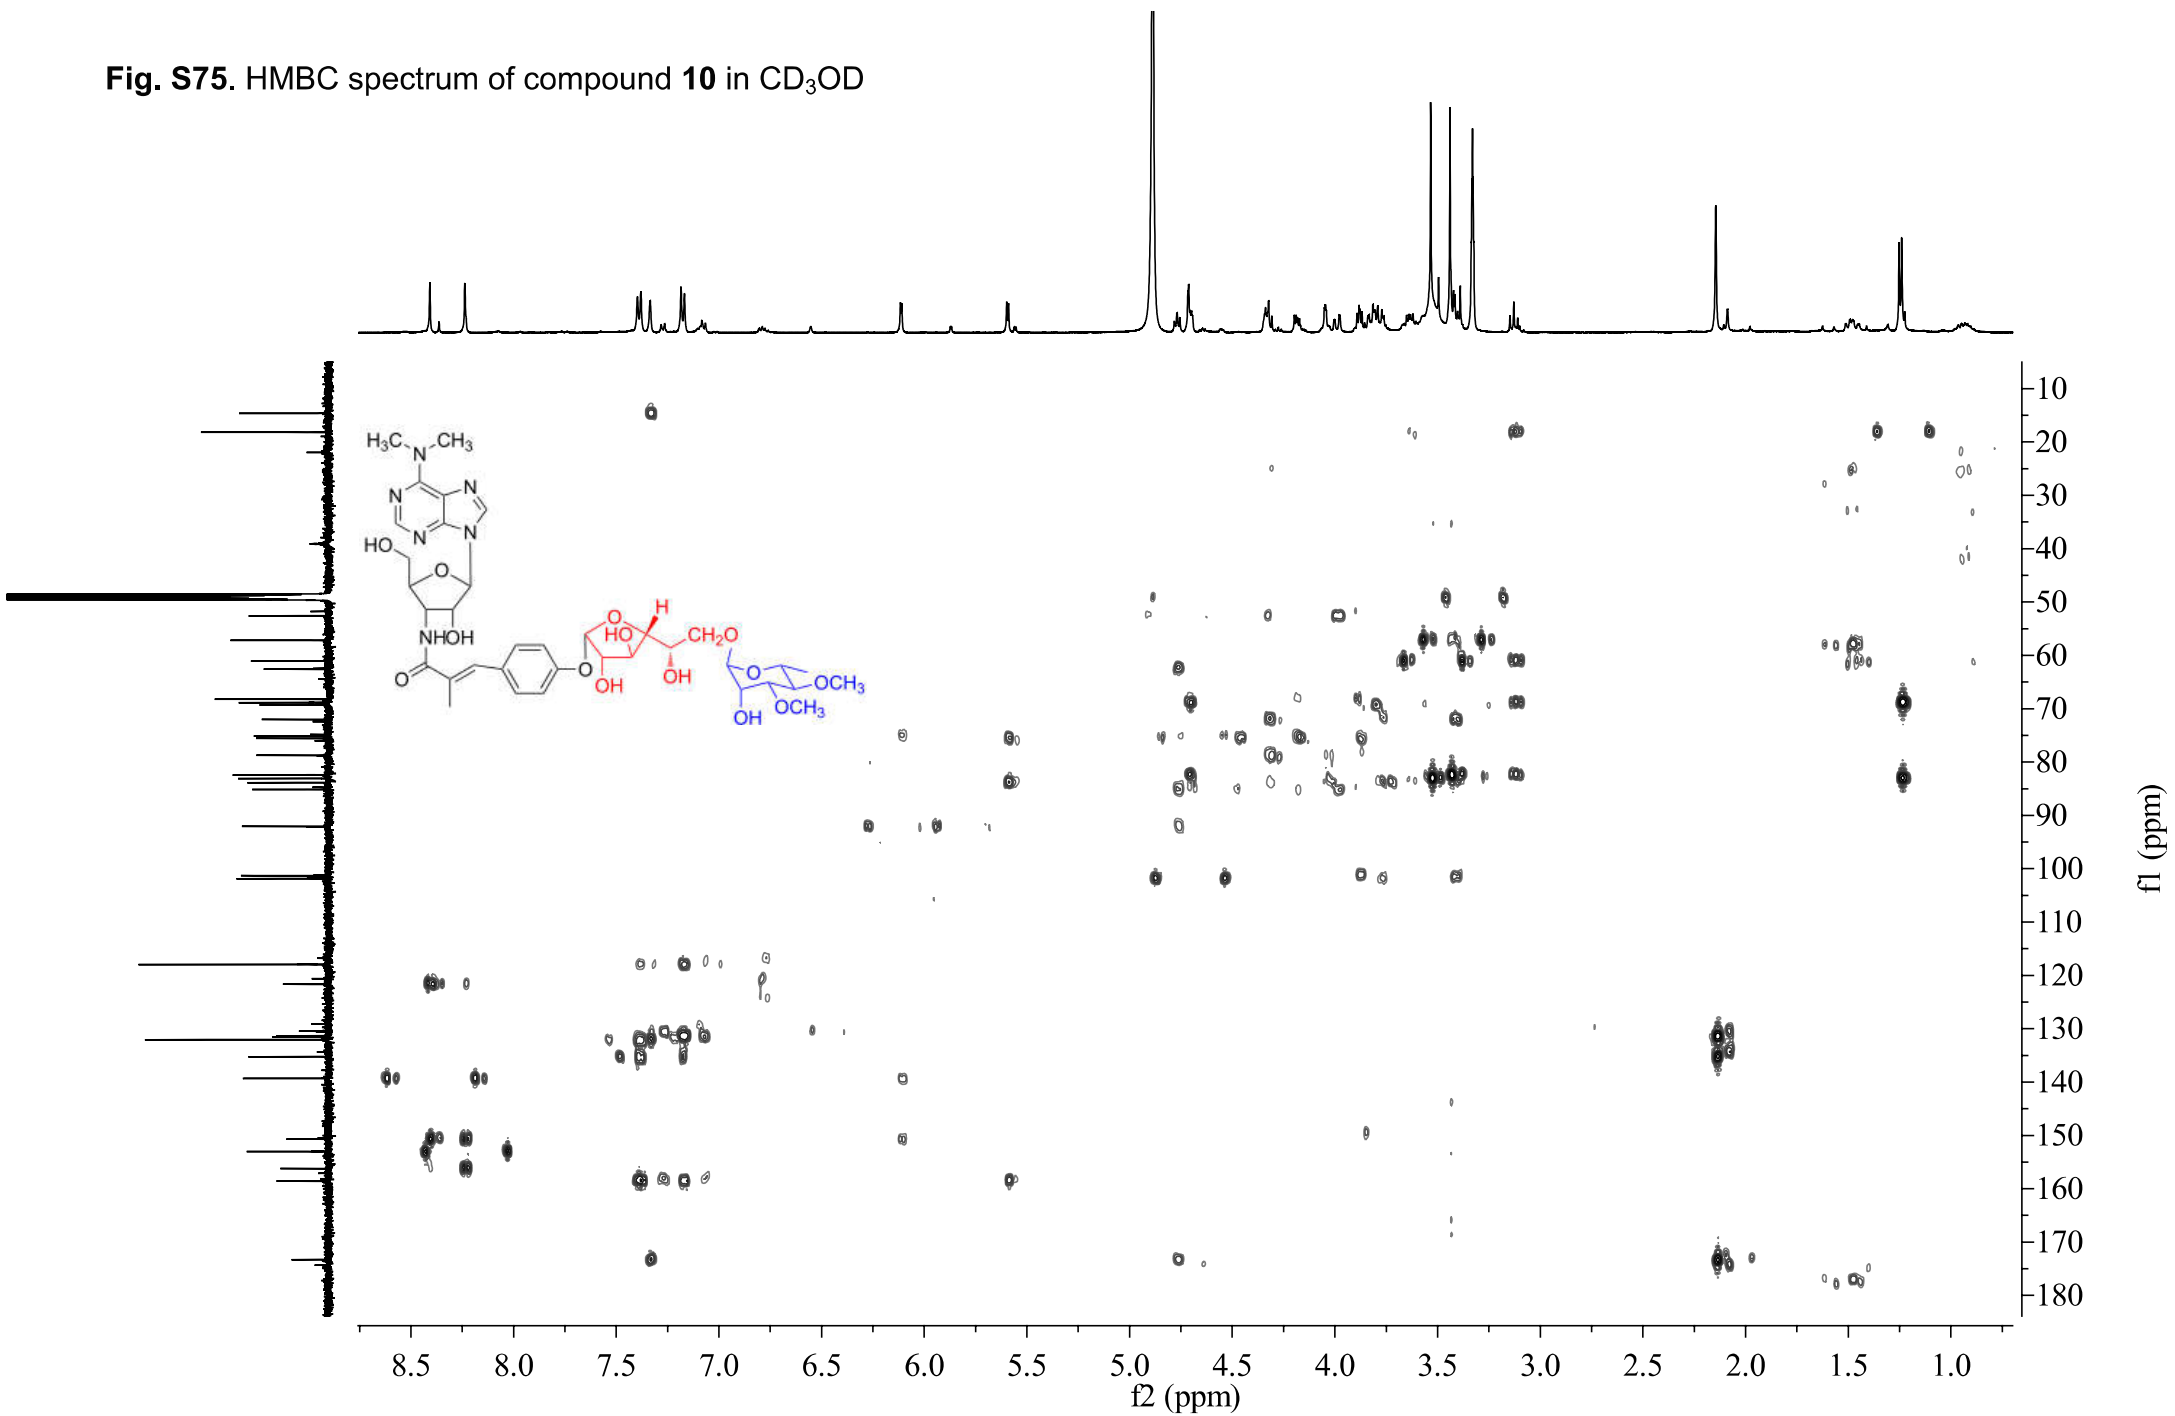

**Fig. S76.**  $^1\text{H}$  NMR (500 MHz) spectrum of compound **11** in  $\text{CD}_3\text{OD}$

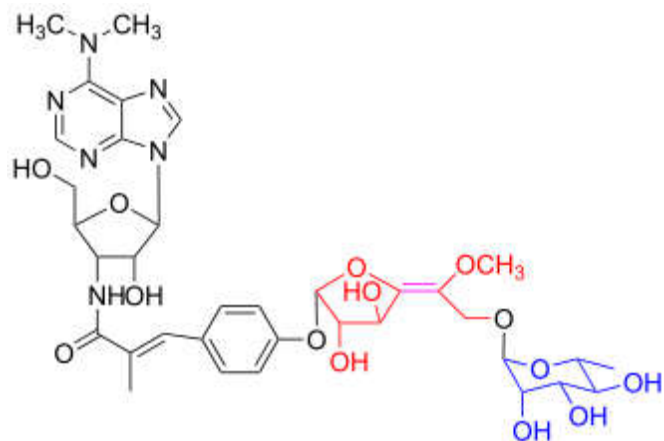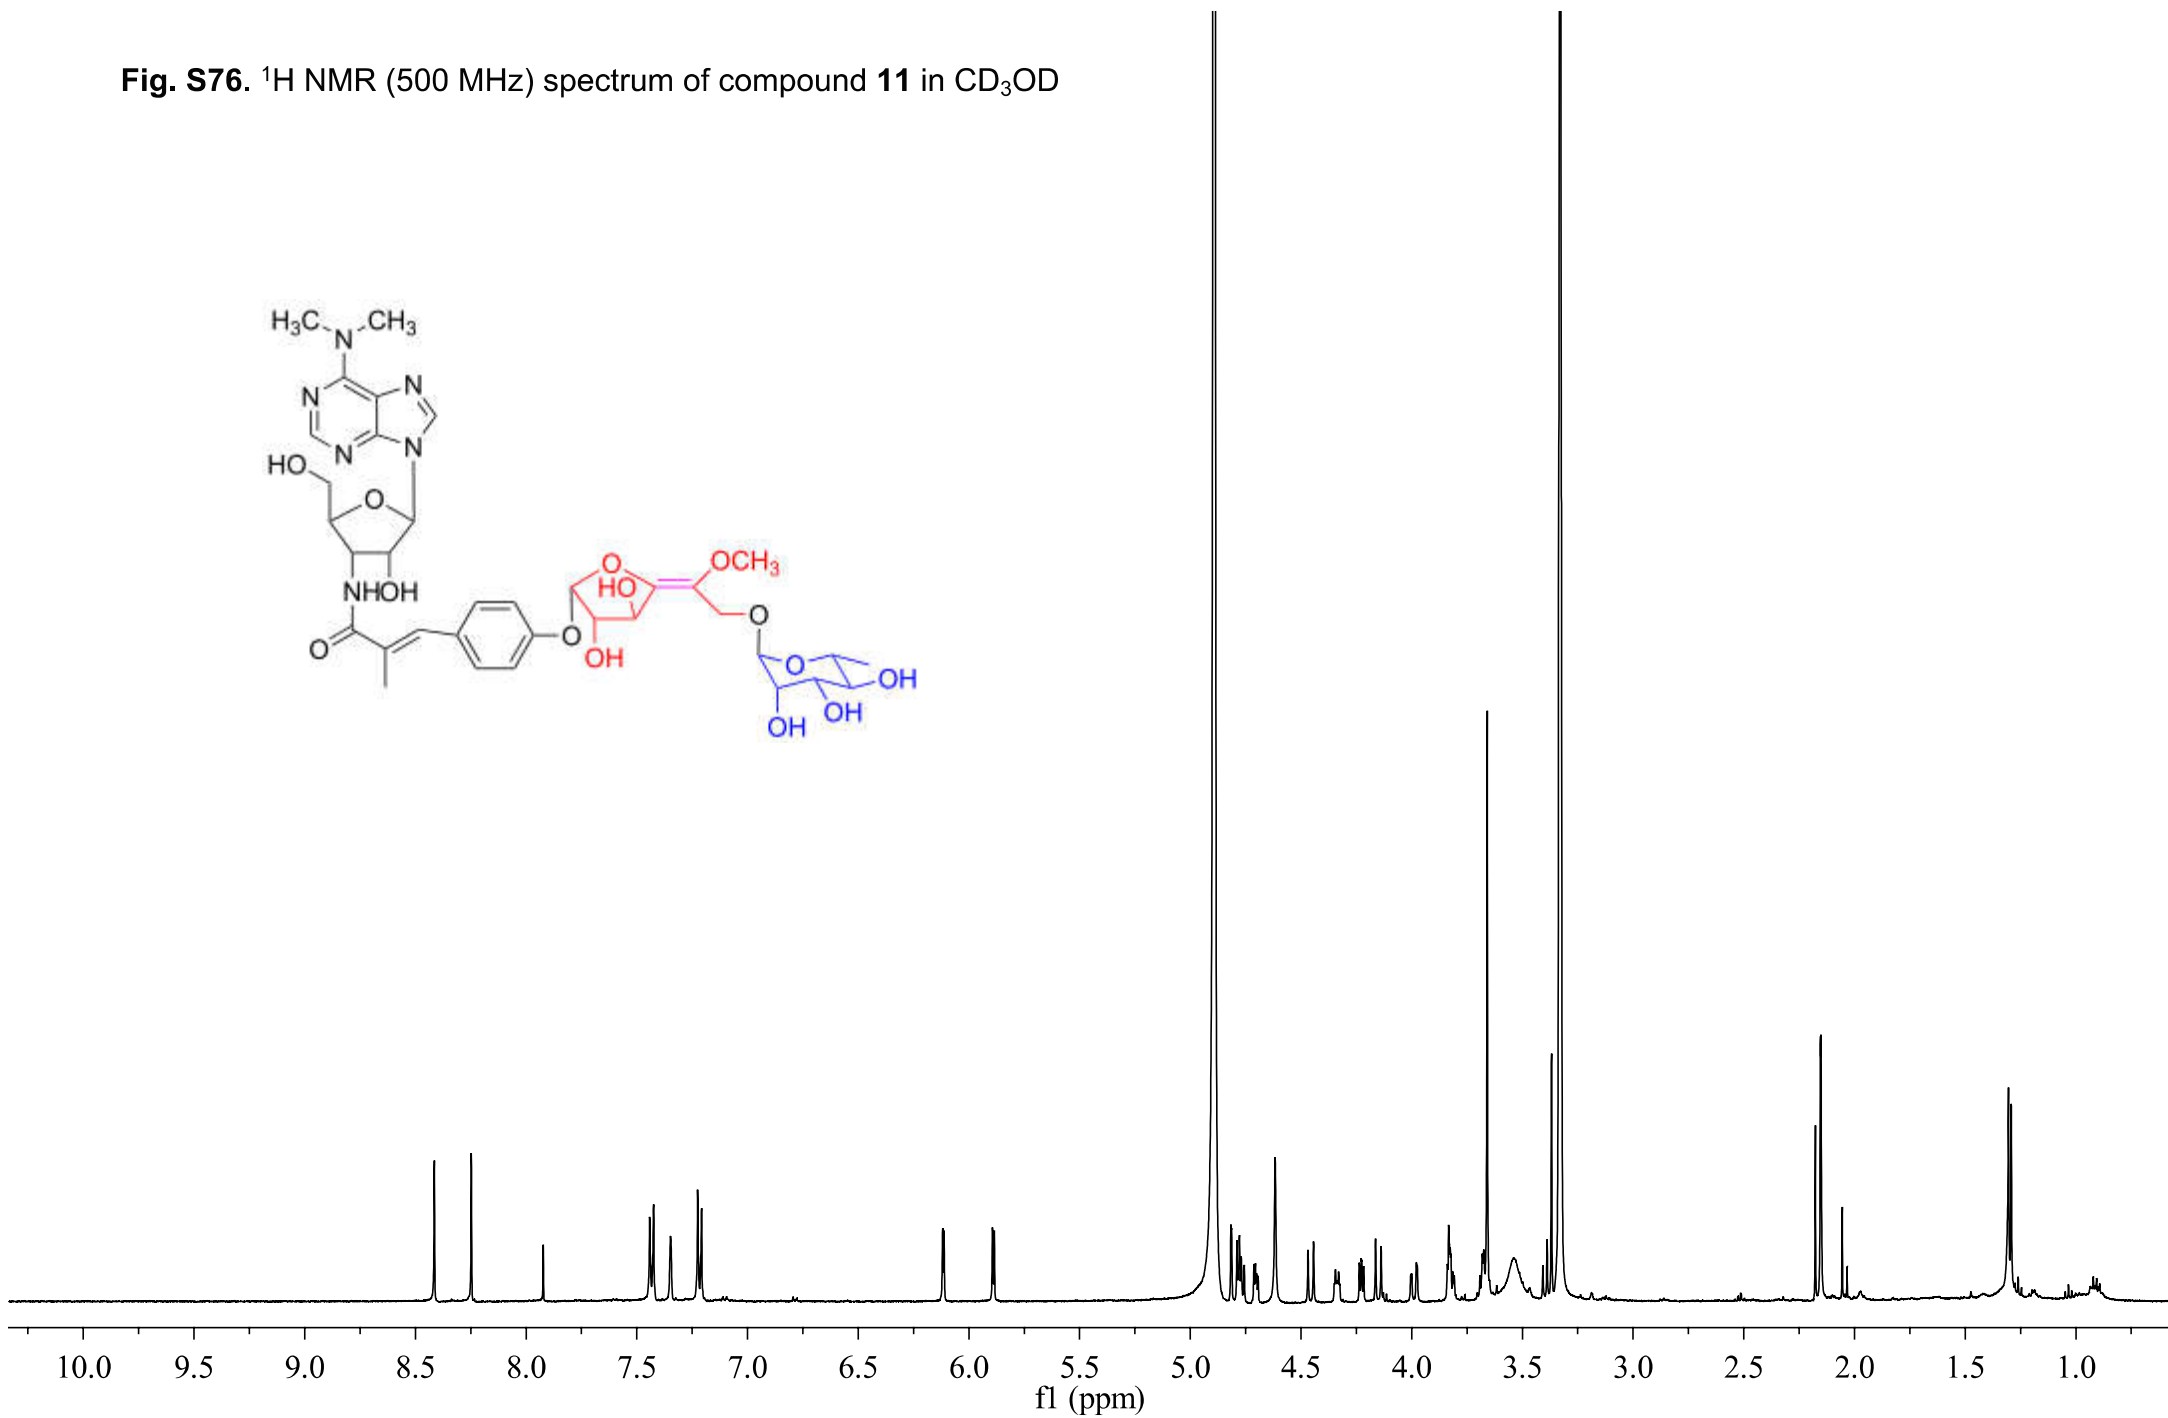

Fig. S77.  $^{13}\text{C}$  NMR (125 MHz) spectrum of compound 11 in  $\text{CD}_3\text{OD}$

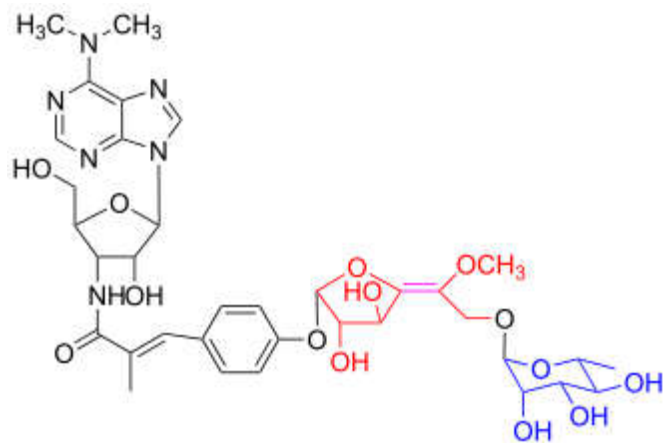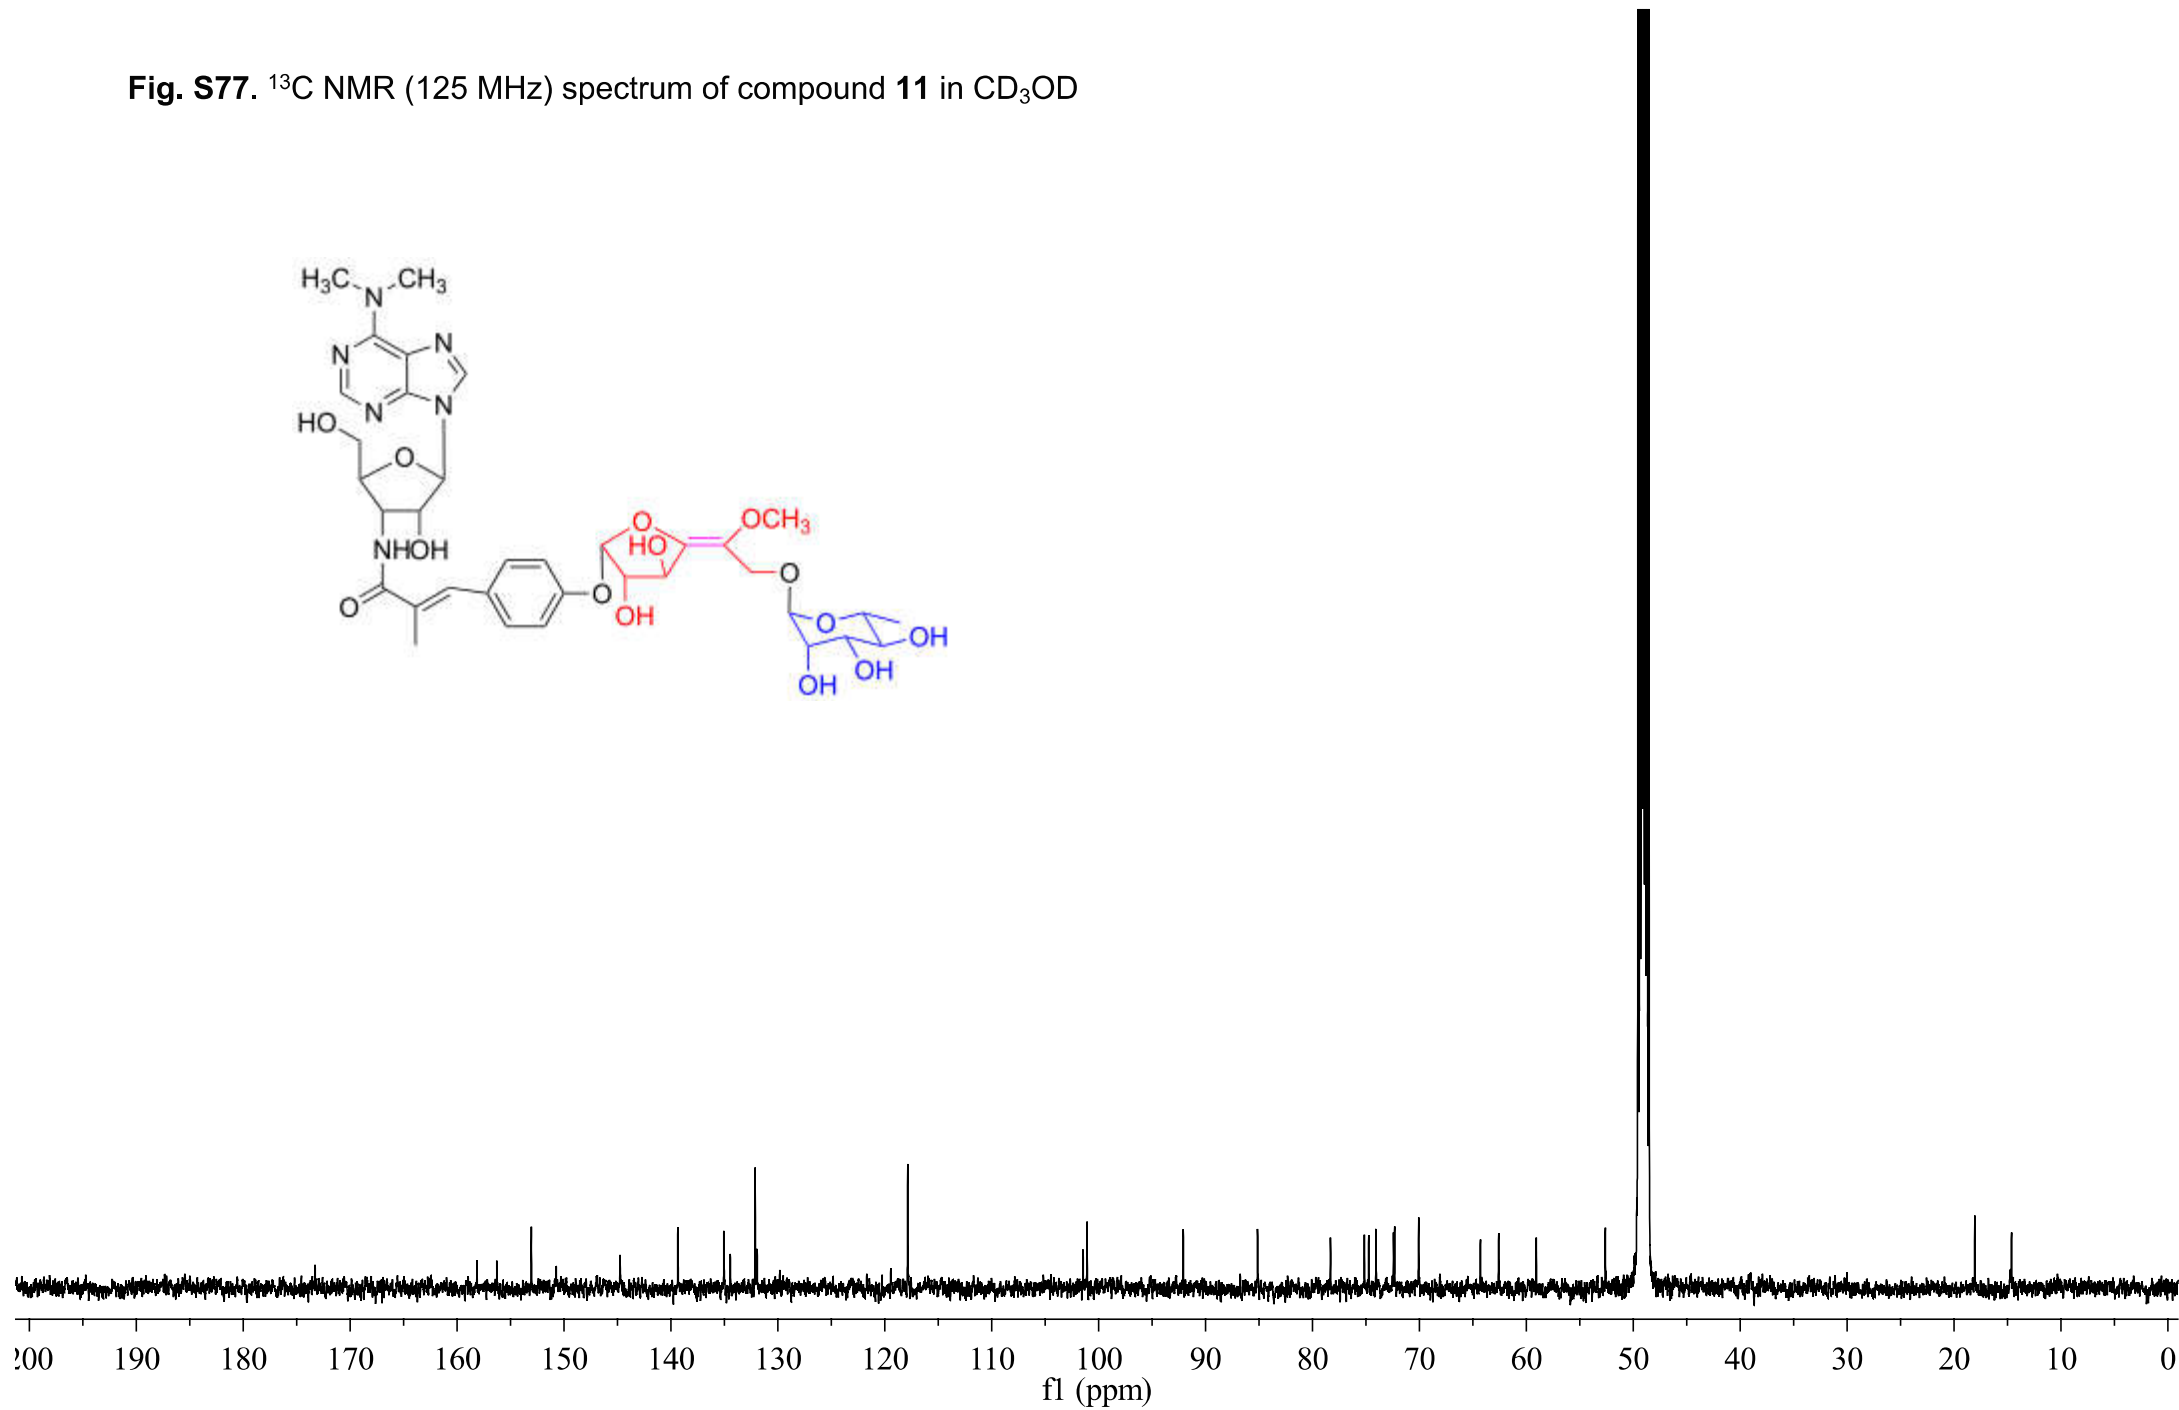

Fig. S78. HSQC spectrum of compound 11 in CD<sub>3</sub>OD

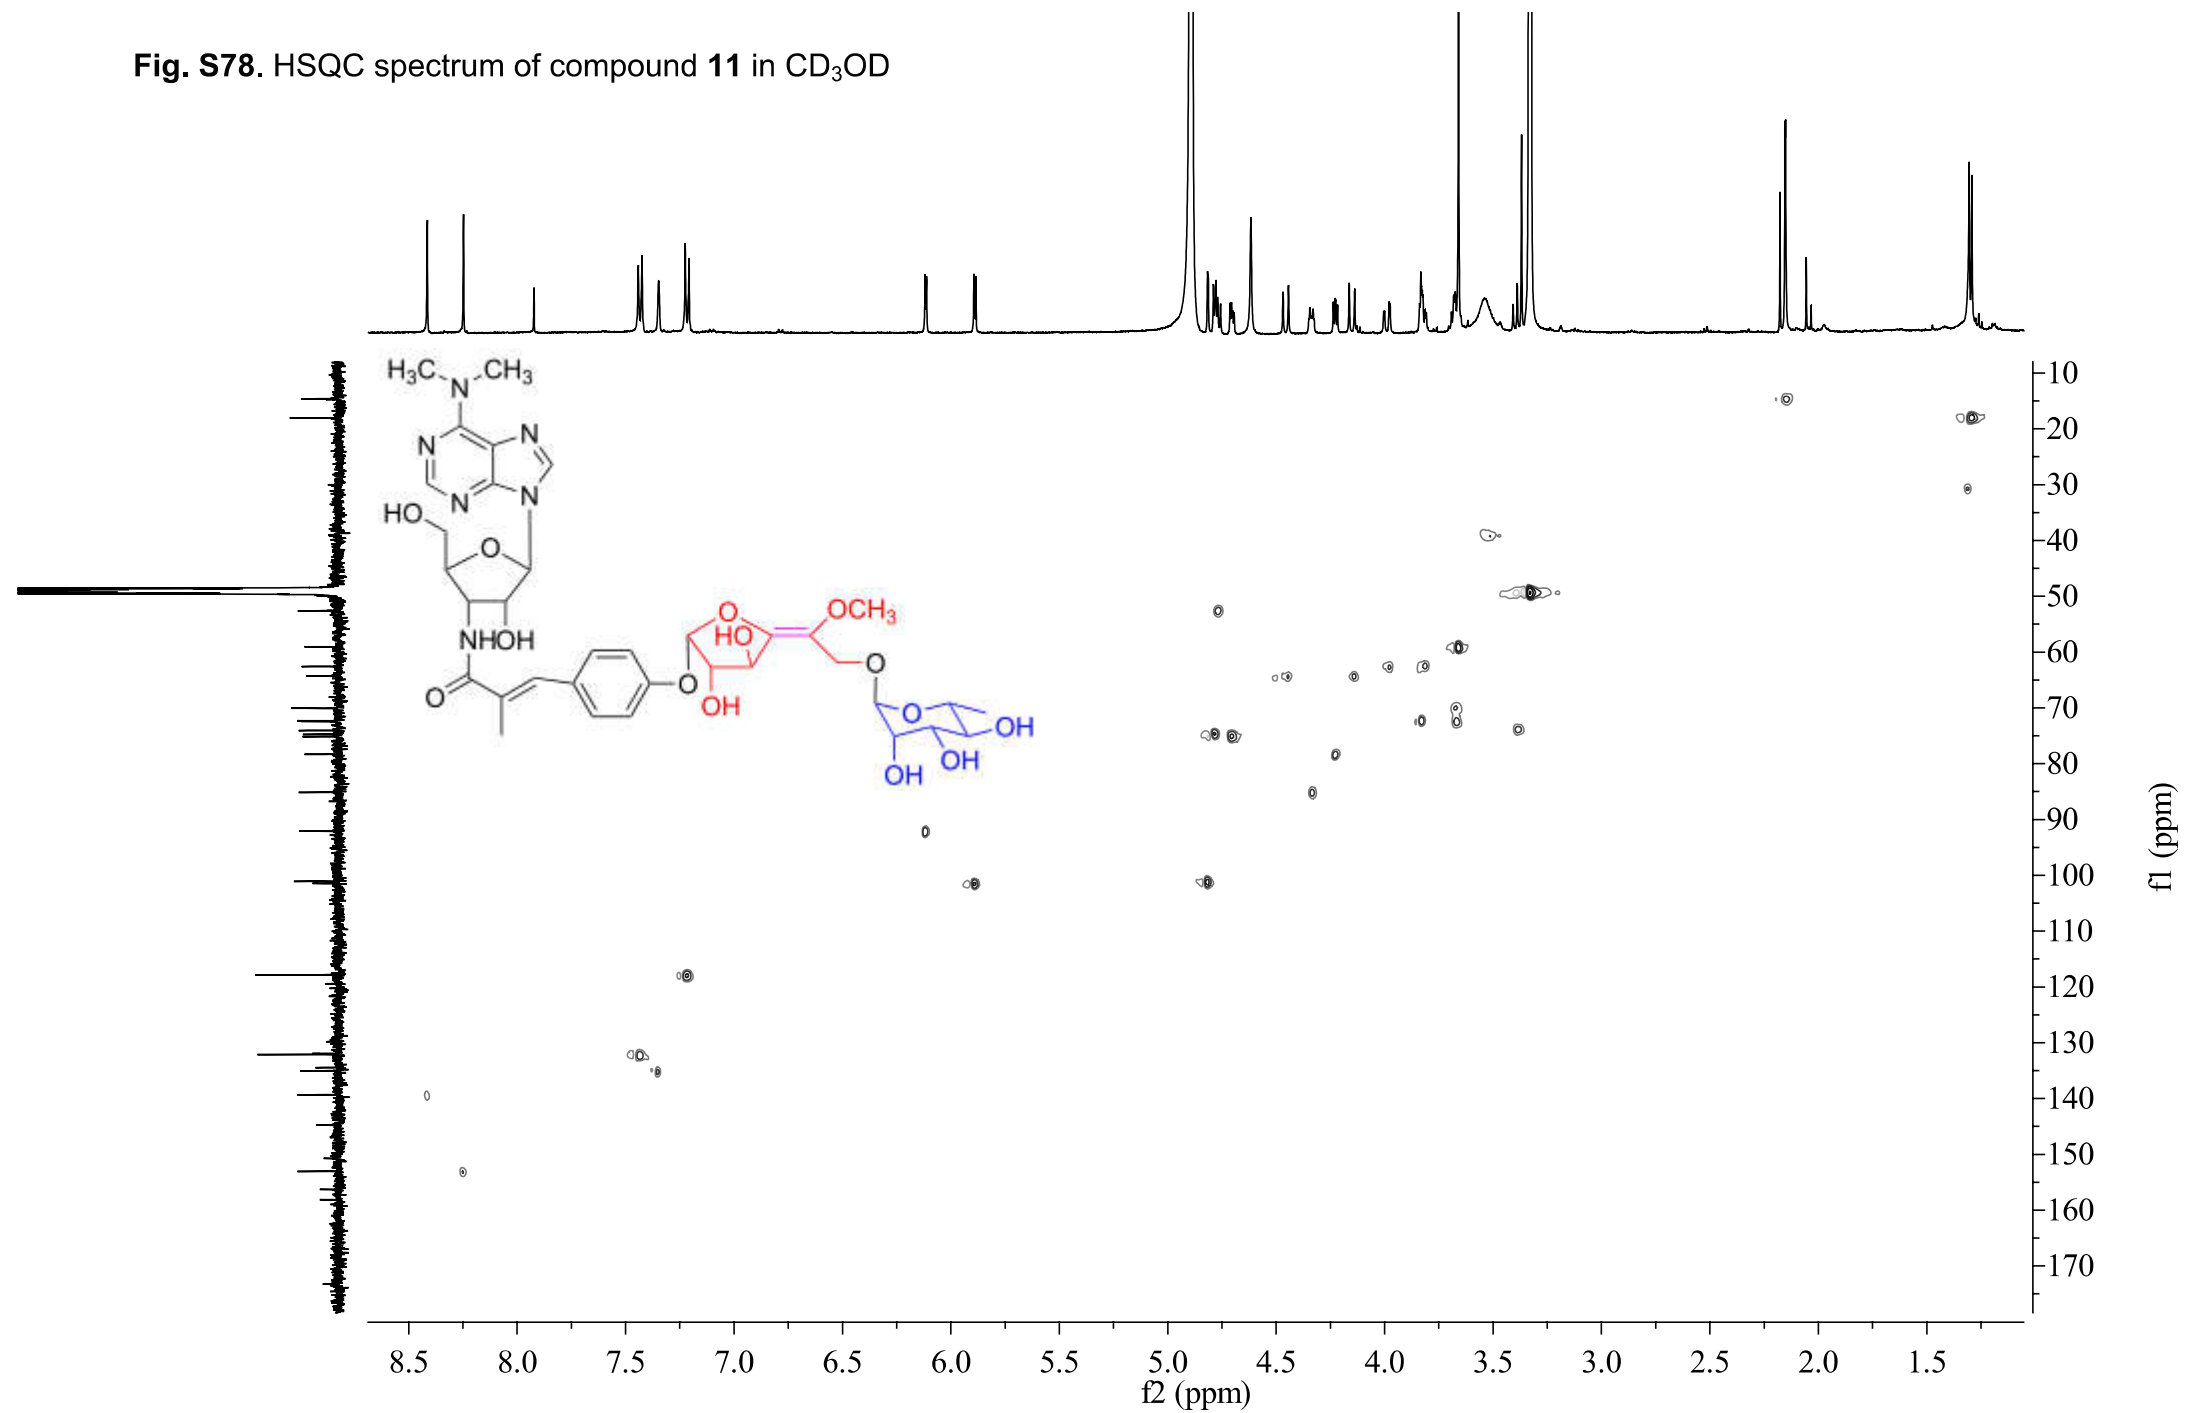

Fig. S79.  $^1\text{H}$ - $^1\text{H}$  COSY spectrum of compound **11** in  $\text{CD}_3\text{OD}$

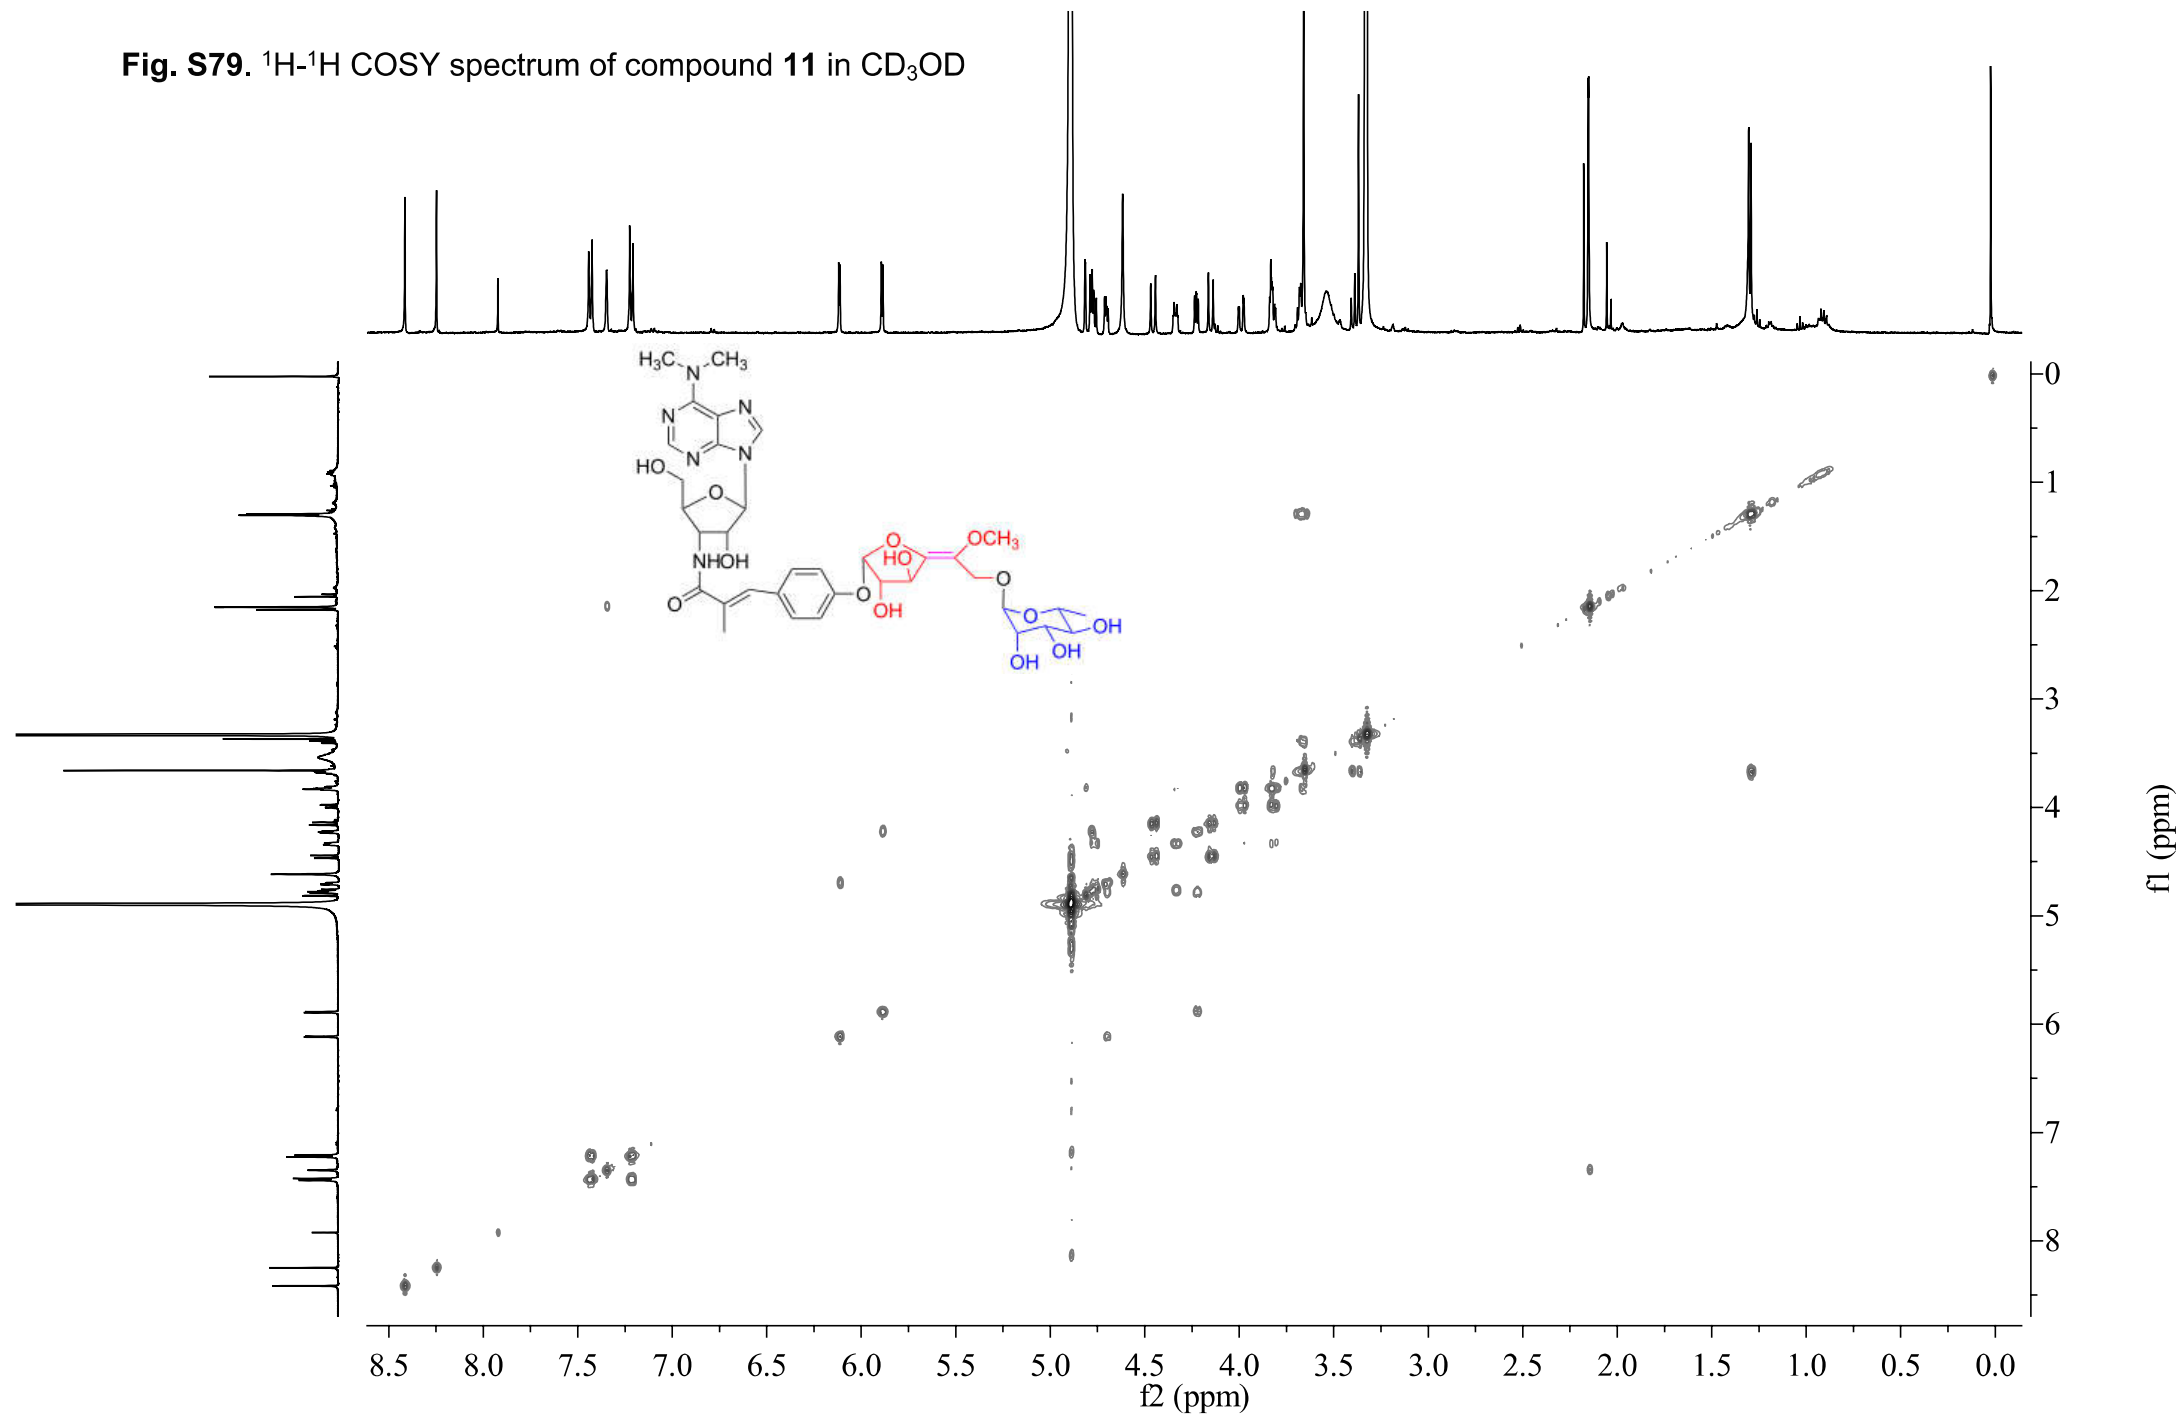

Fig. S80. HMBC spectrum of compound **11** in CD<sub>3</sub>OD

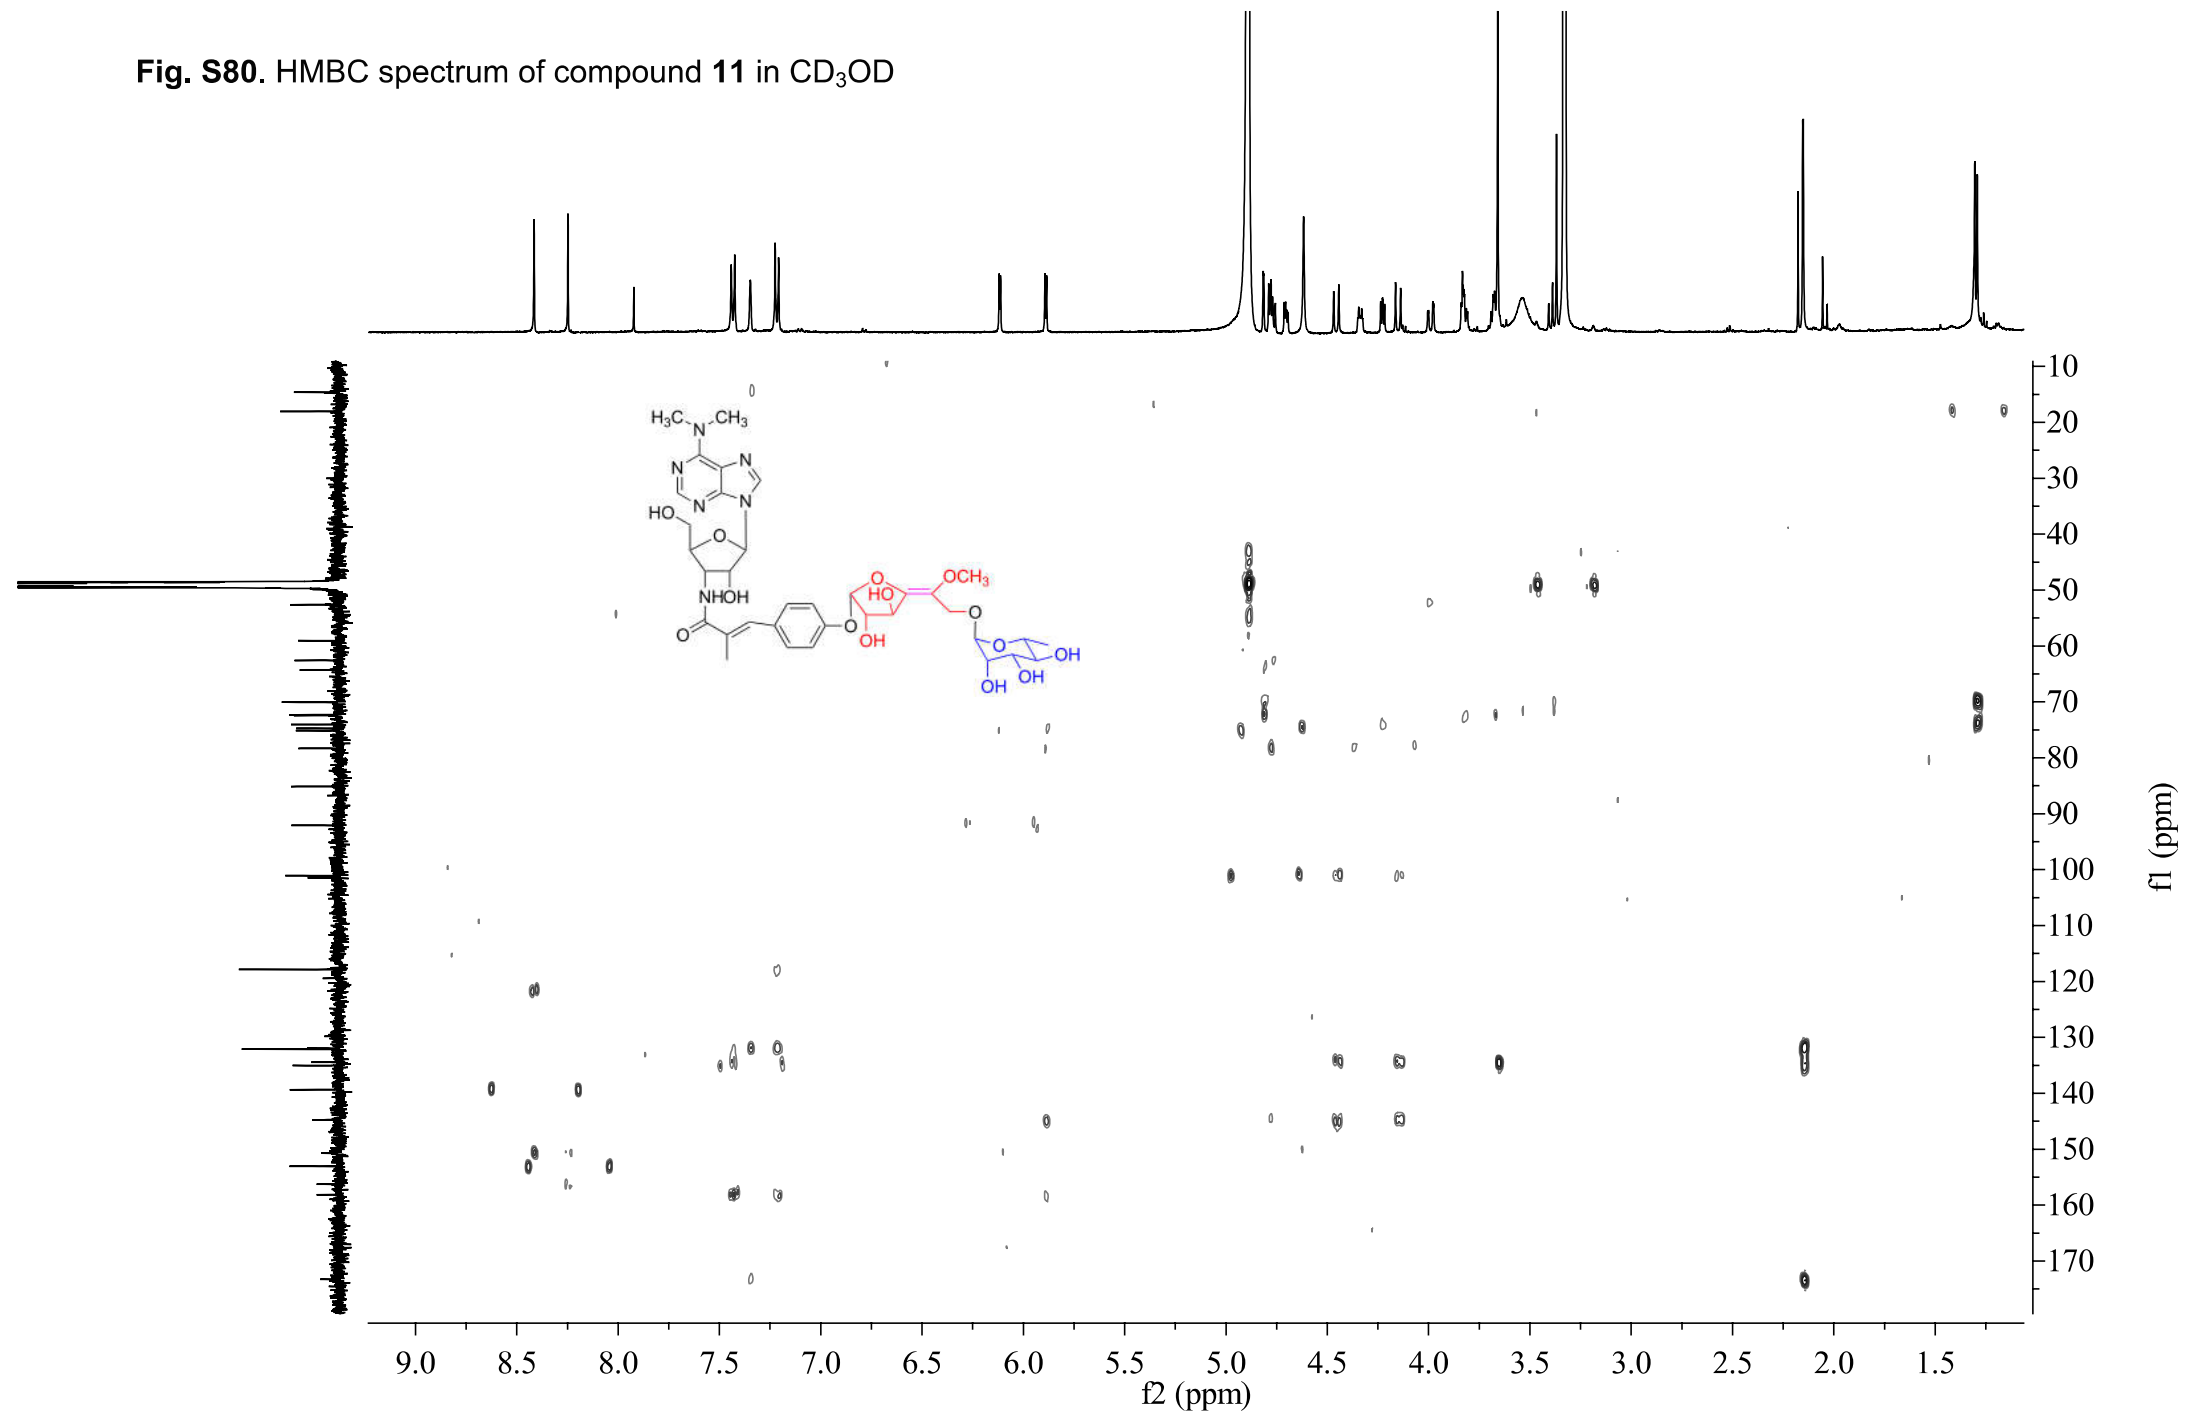

**Fig. S81.**  $^1\text{H}$  NMR (500 MHz) spectrum of compound **12** in  $\text{CDCl}_3$

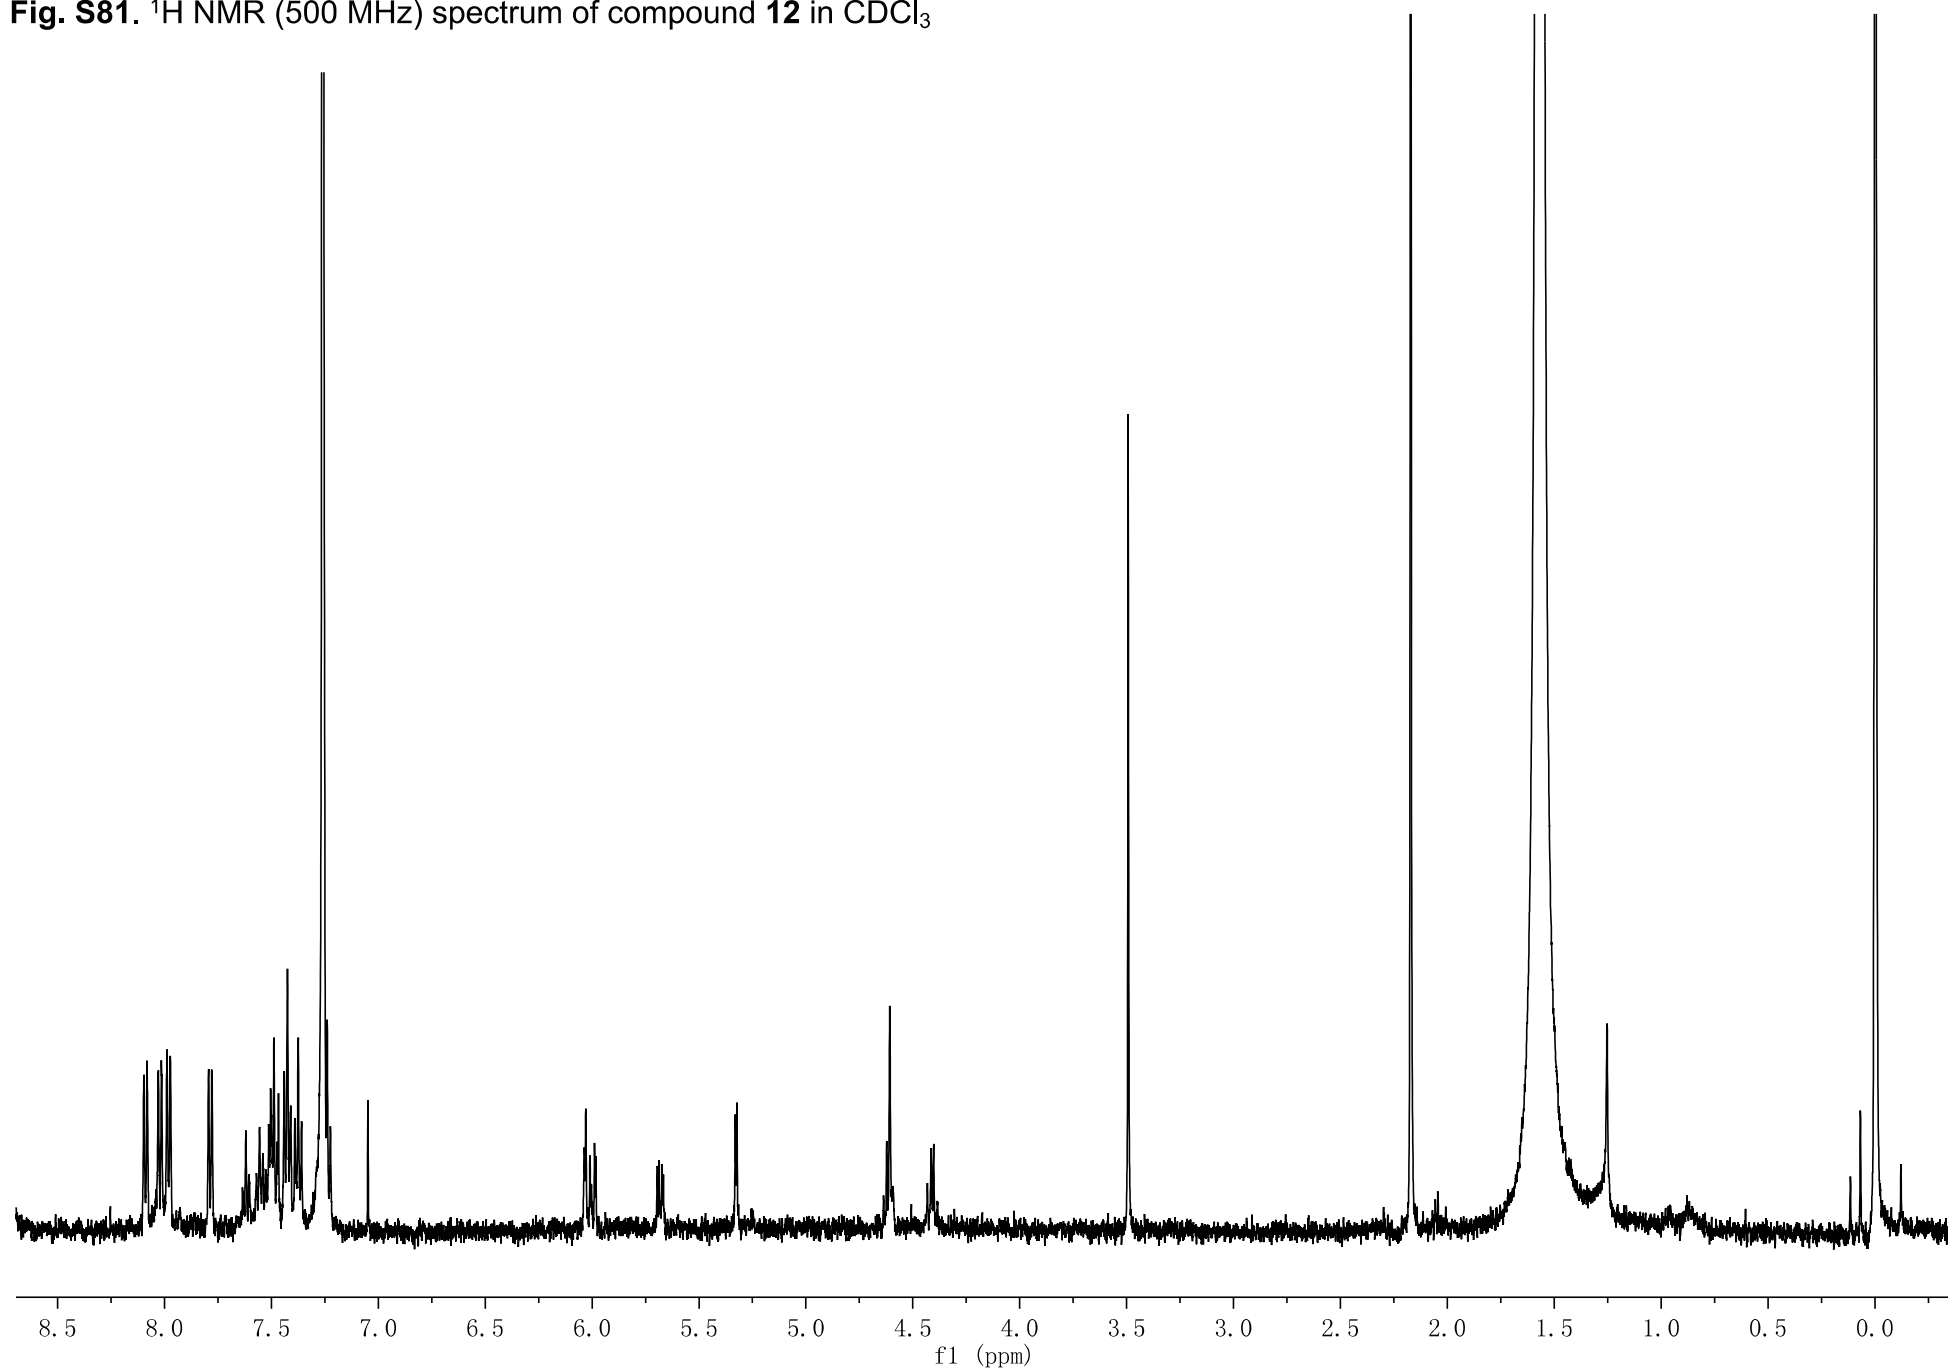

**Fig. S82.**  $^1\text{H}$  NMR (500 MHz) spectrum of compound **13** in  $\text{CDCl}_3$

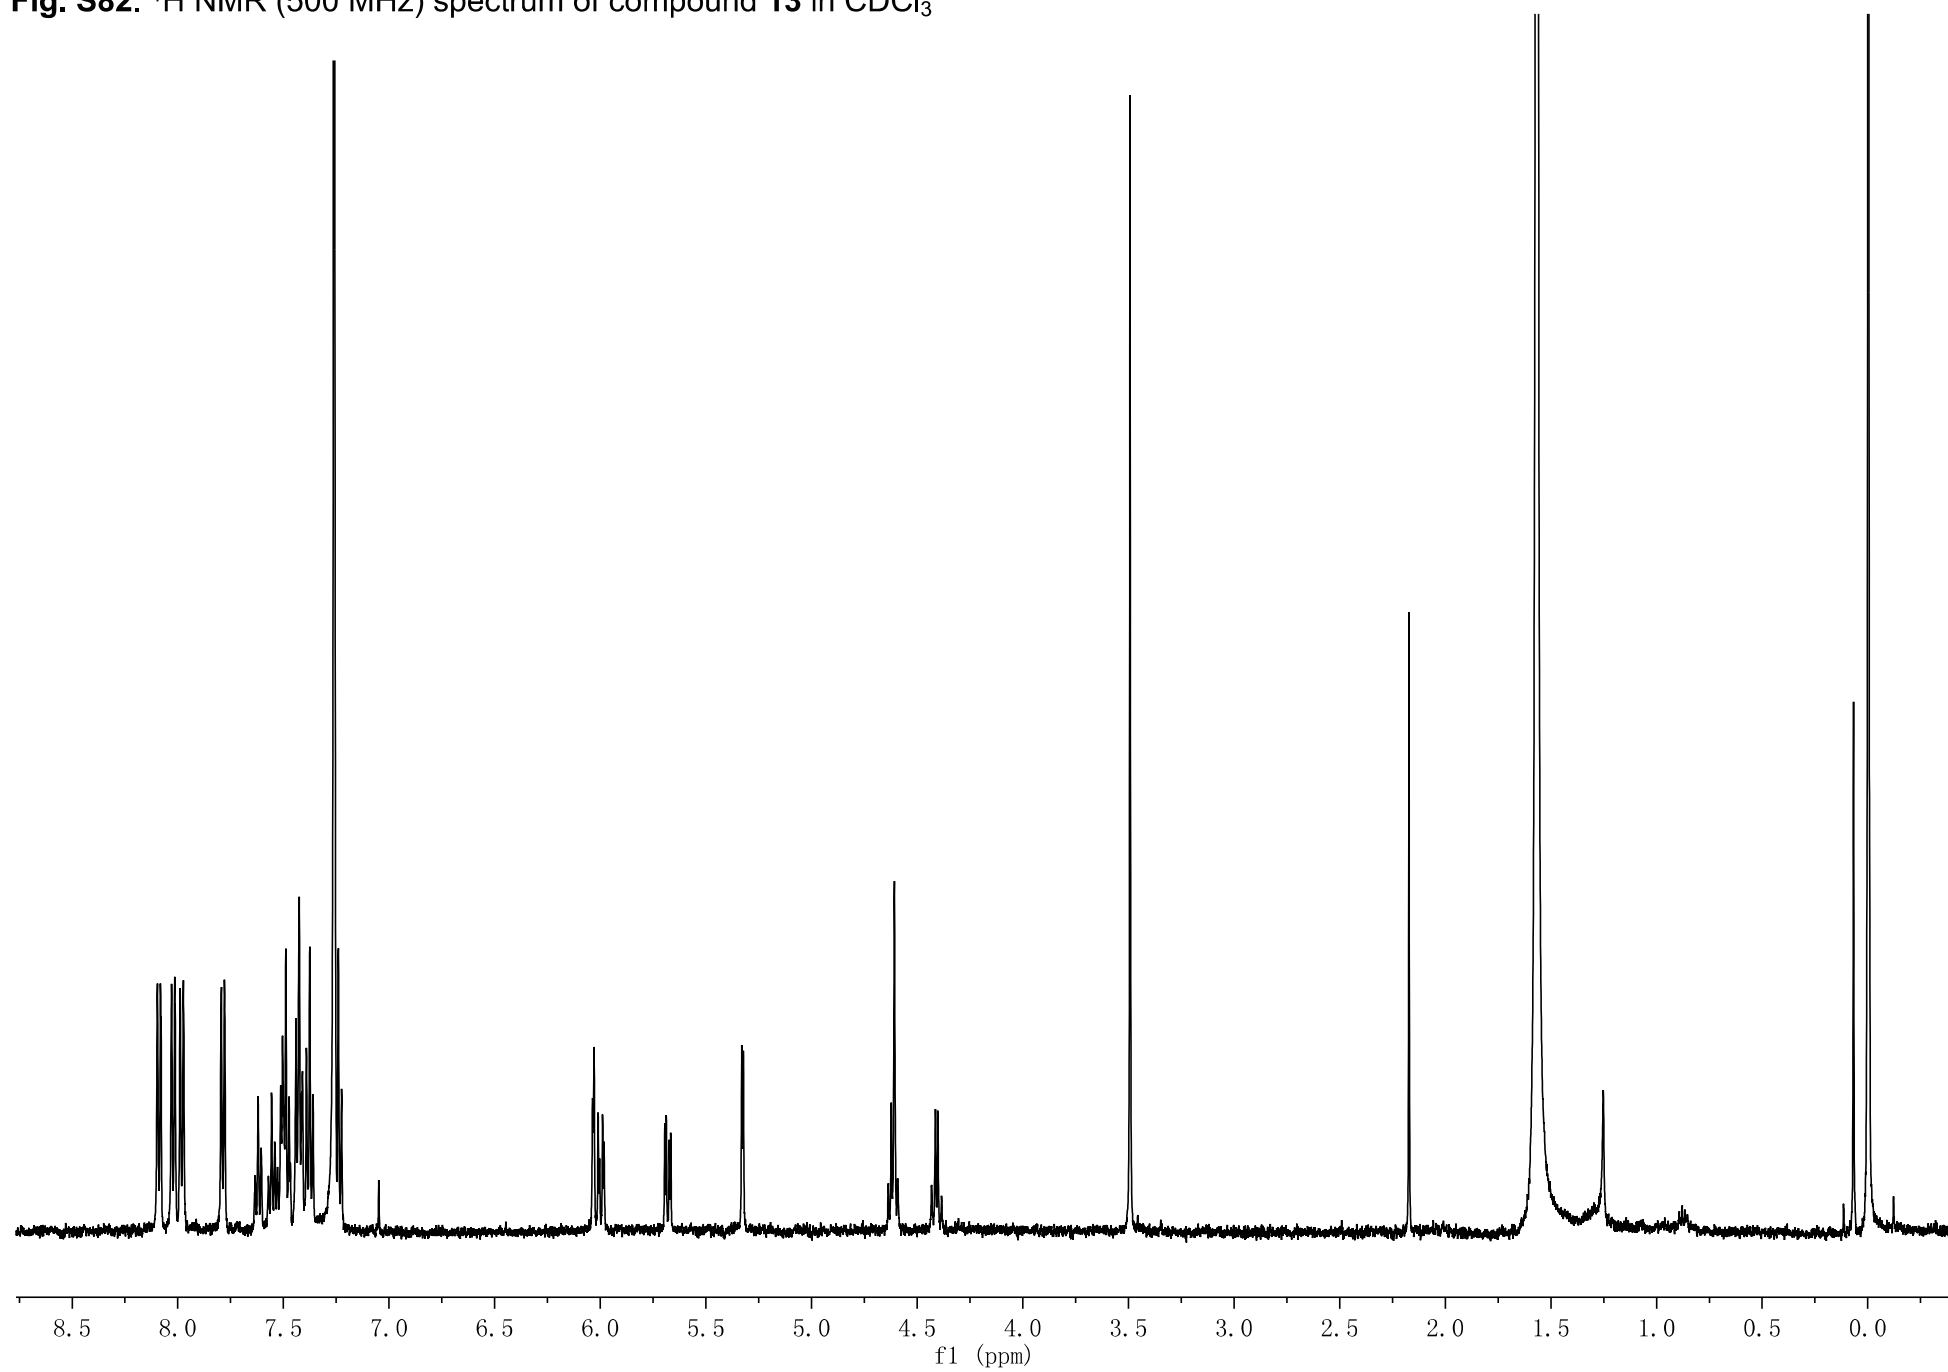



**Fig. S83.**  $^1\text{H}$  NMR (500 MHz) spectrum of compound **14** in  $\text{CDCl}_3$

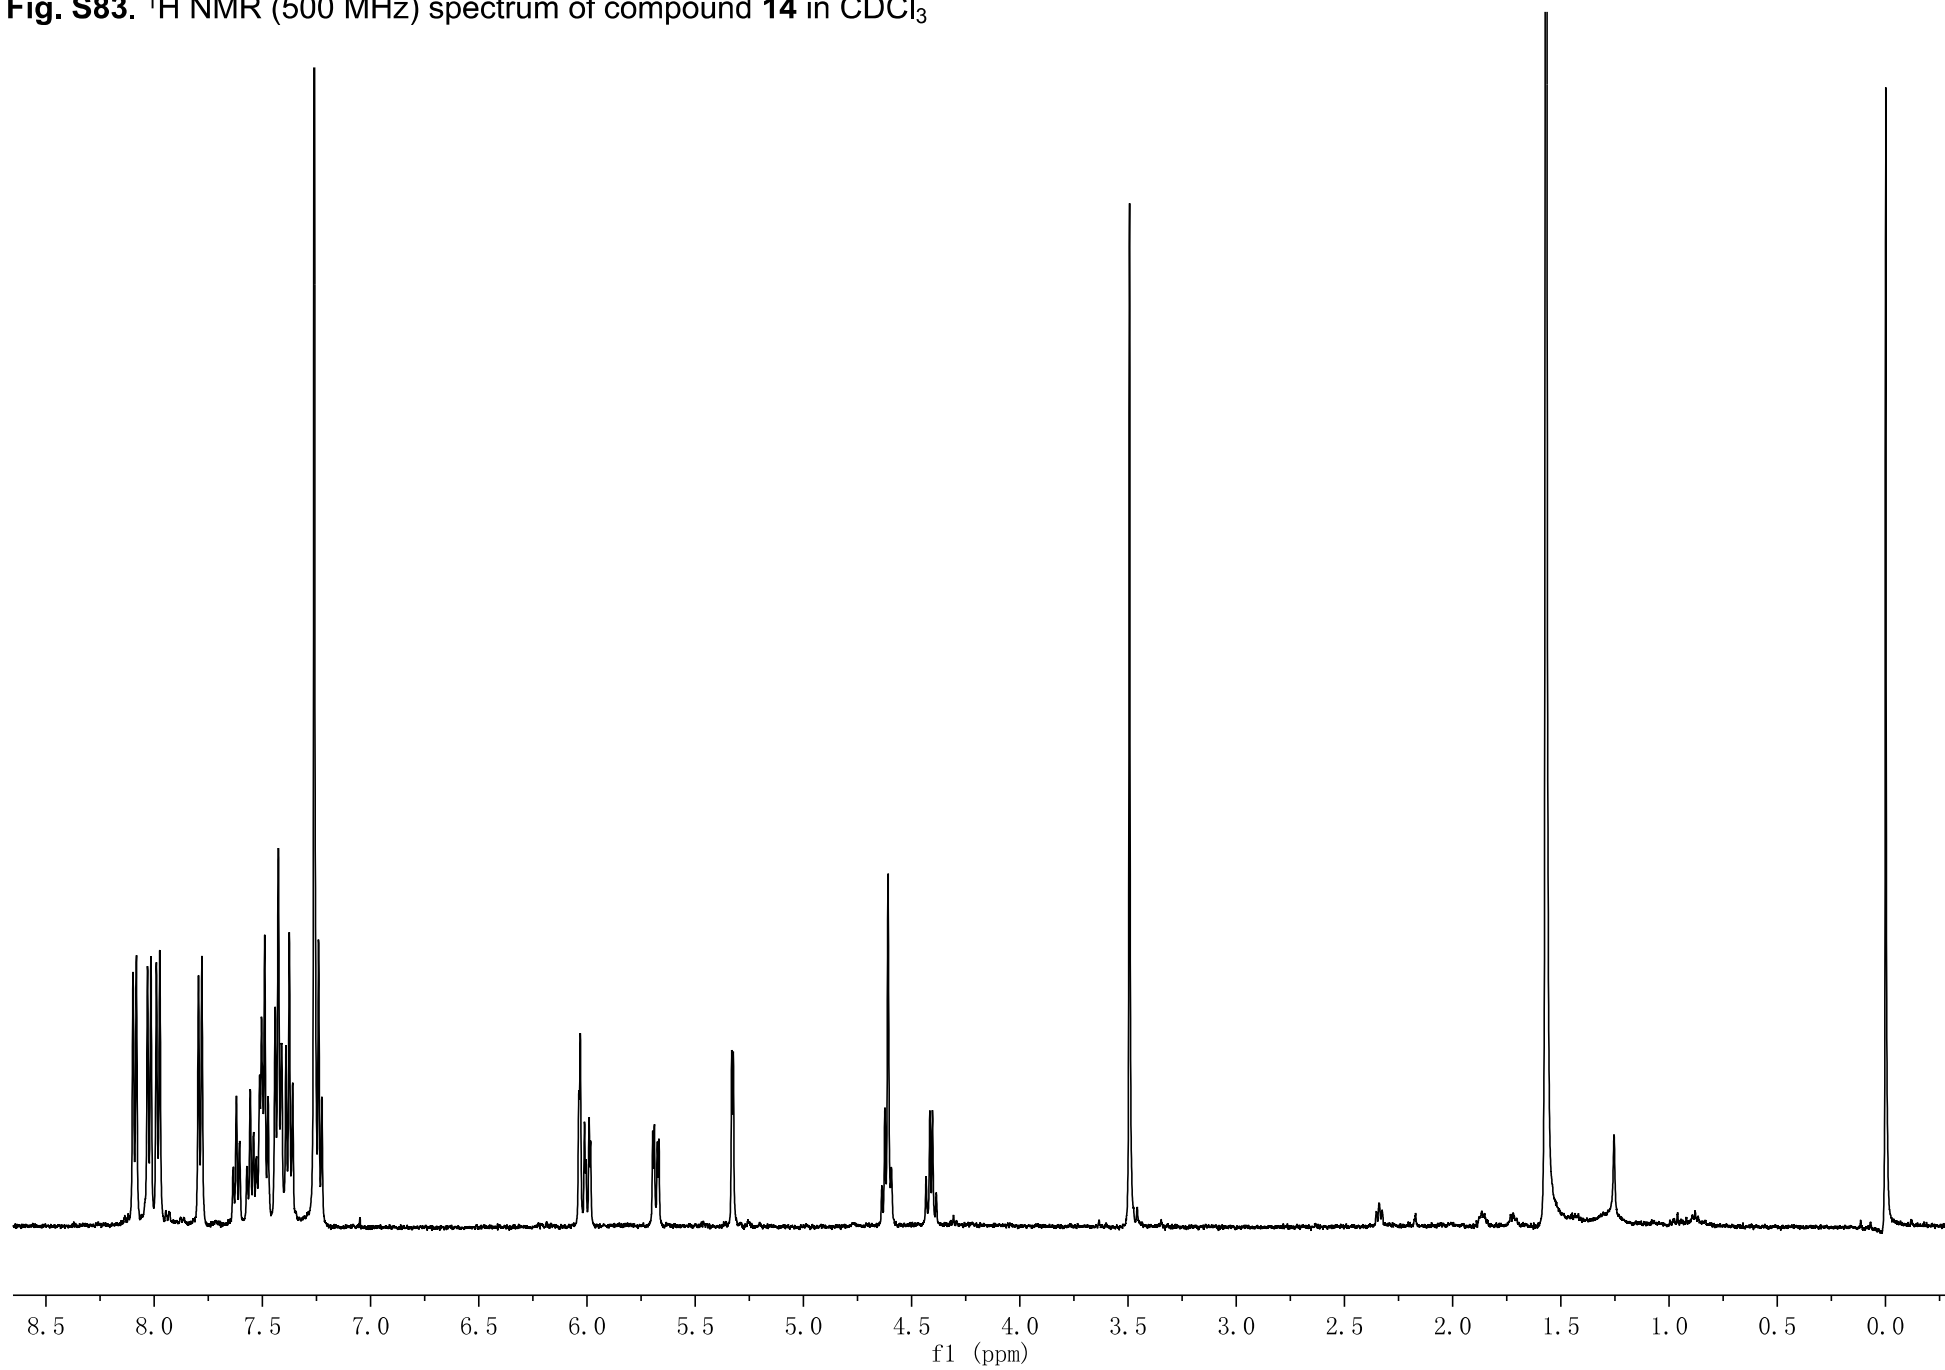

**Fig. S84.**  $^{13}\text{C}$  NMR (125MHz) spectrum of compound **1** ( $[1-^{13}\text{C}]$  D-mannose-derived) in  $\text{CD}_3\text{OD}$

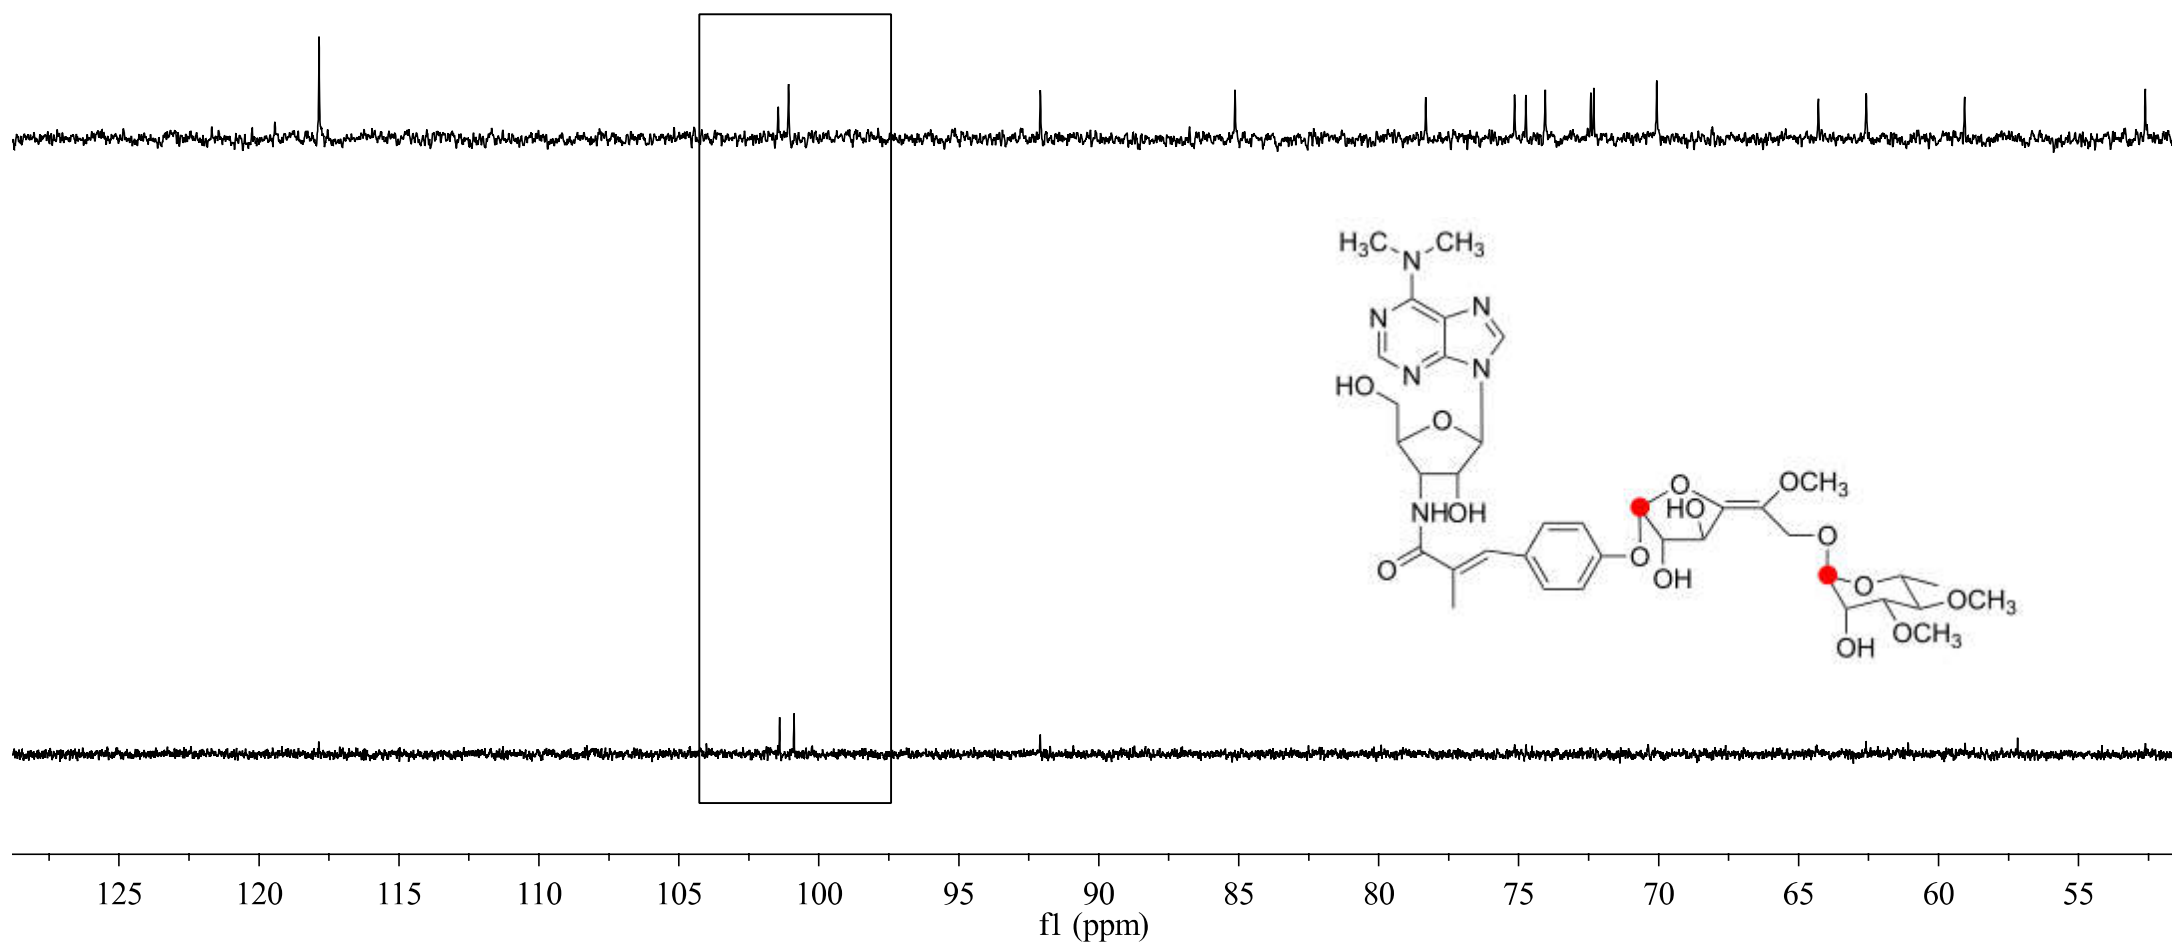

**Fig. S85.**  $^{13}\text{C}$  NMR (125MHz) spectrum of compound **1** ( $[1-^{13}\text{C}]$  D-mannose-derived) in  $\text{CD}_3\text{OD}$

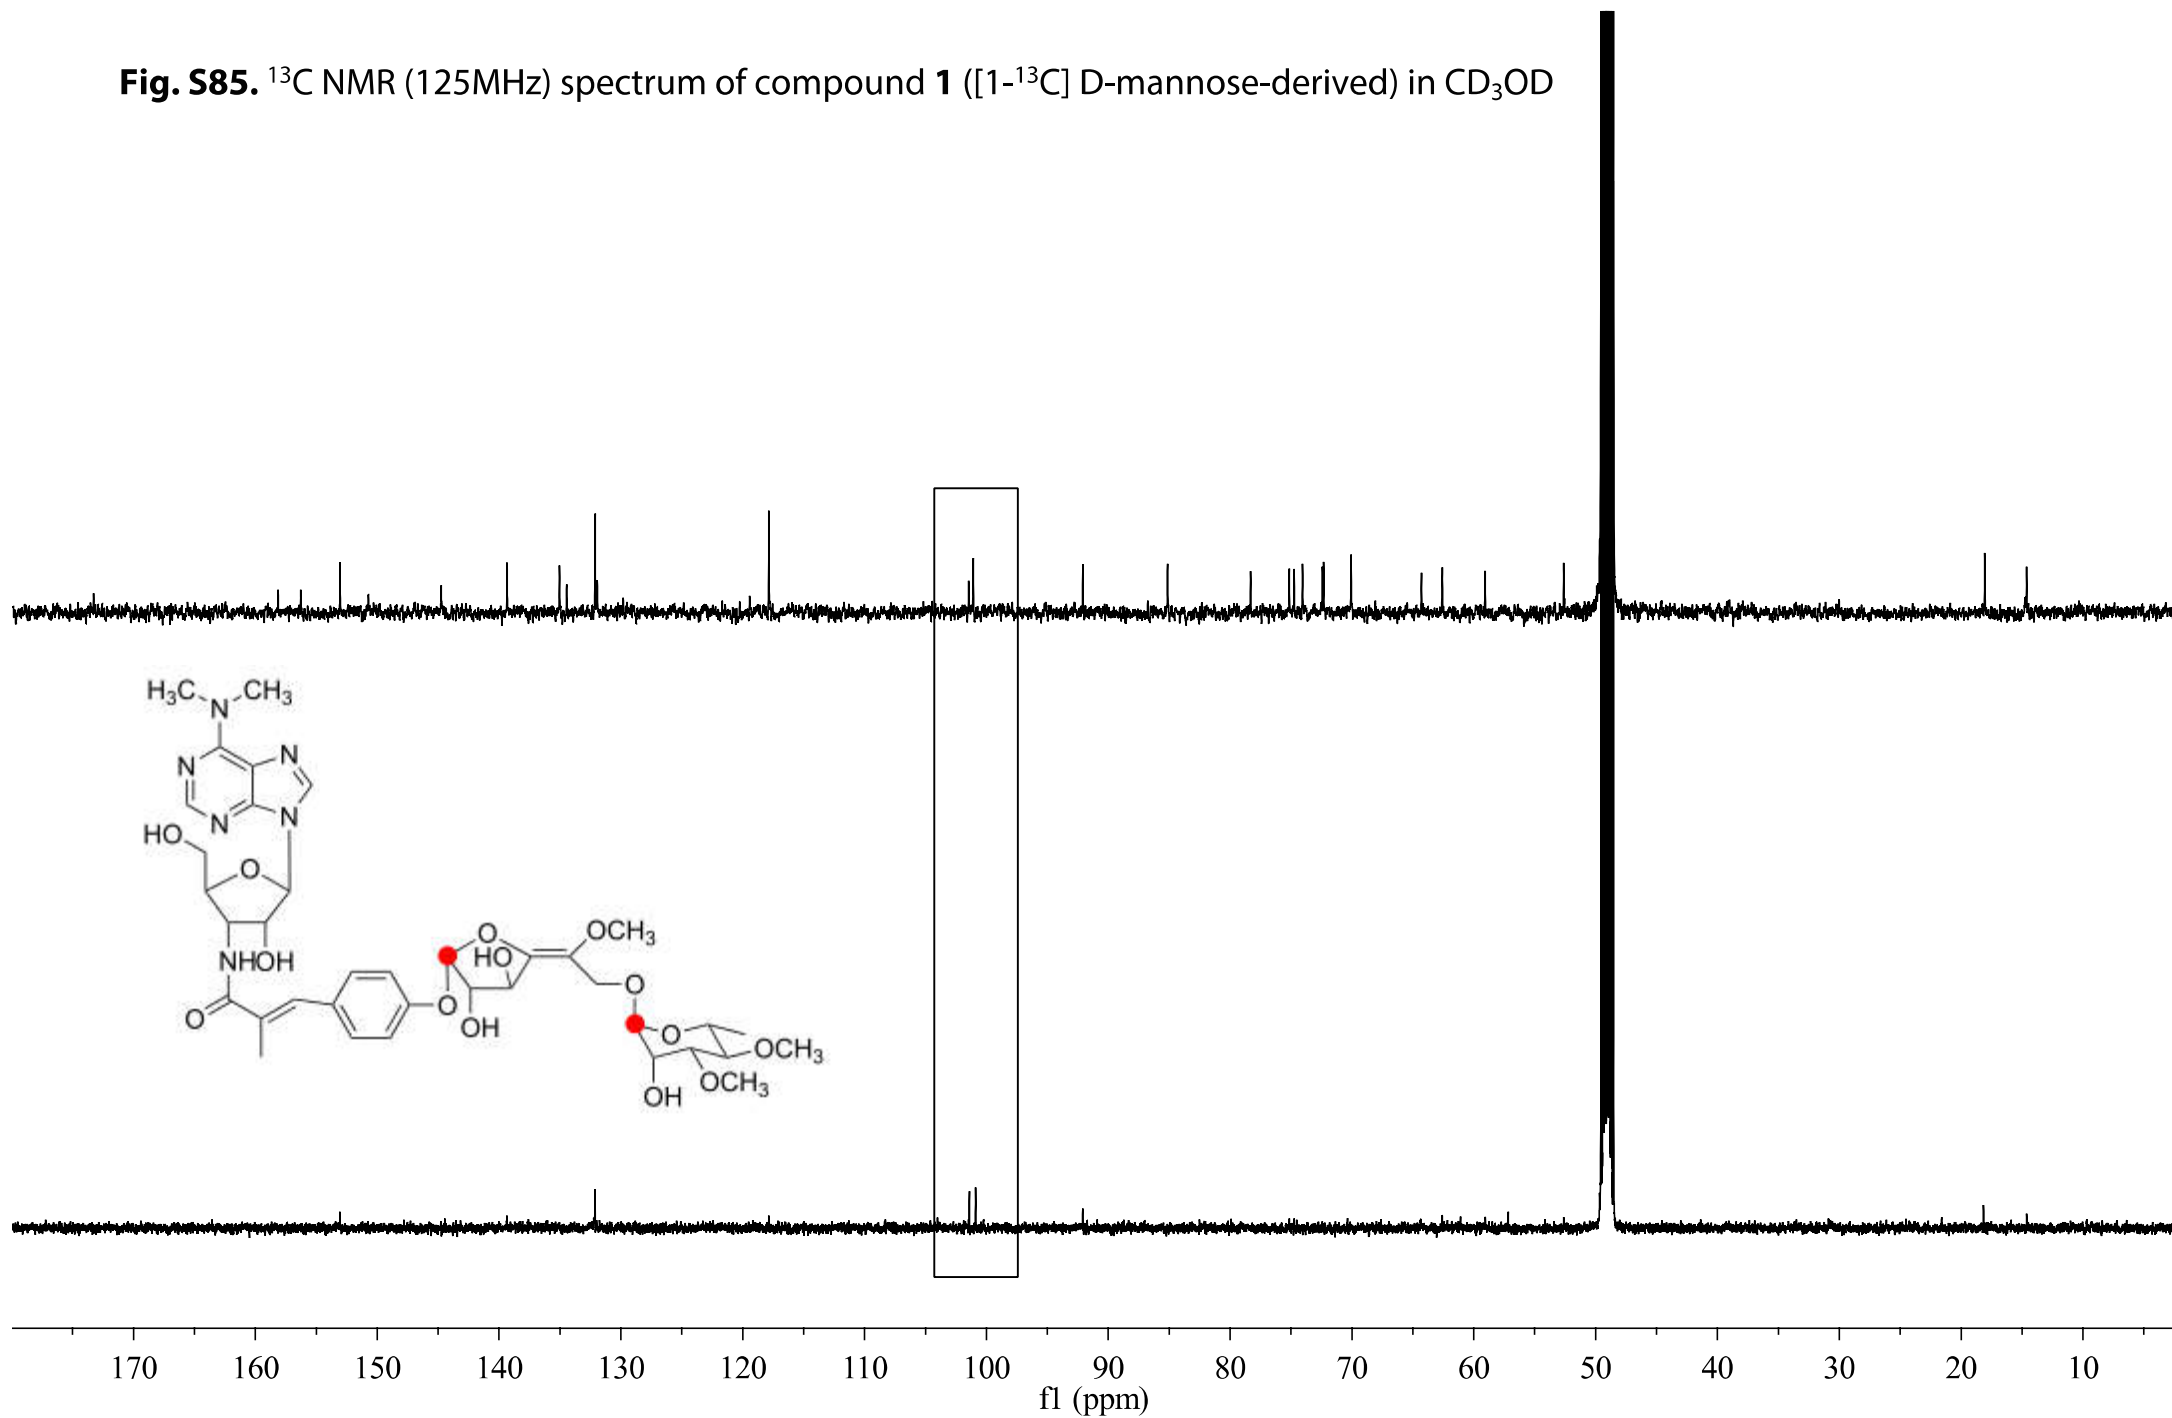

**Fig. S86.**  $^1\text{H}$  NMR (500 MHz) spectra of MtdL-mediated enzymatic mixture and GDP- $\beta$ -L-galactose in  $\text{D}_2\text{O}$

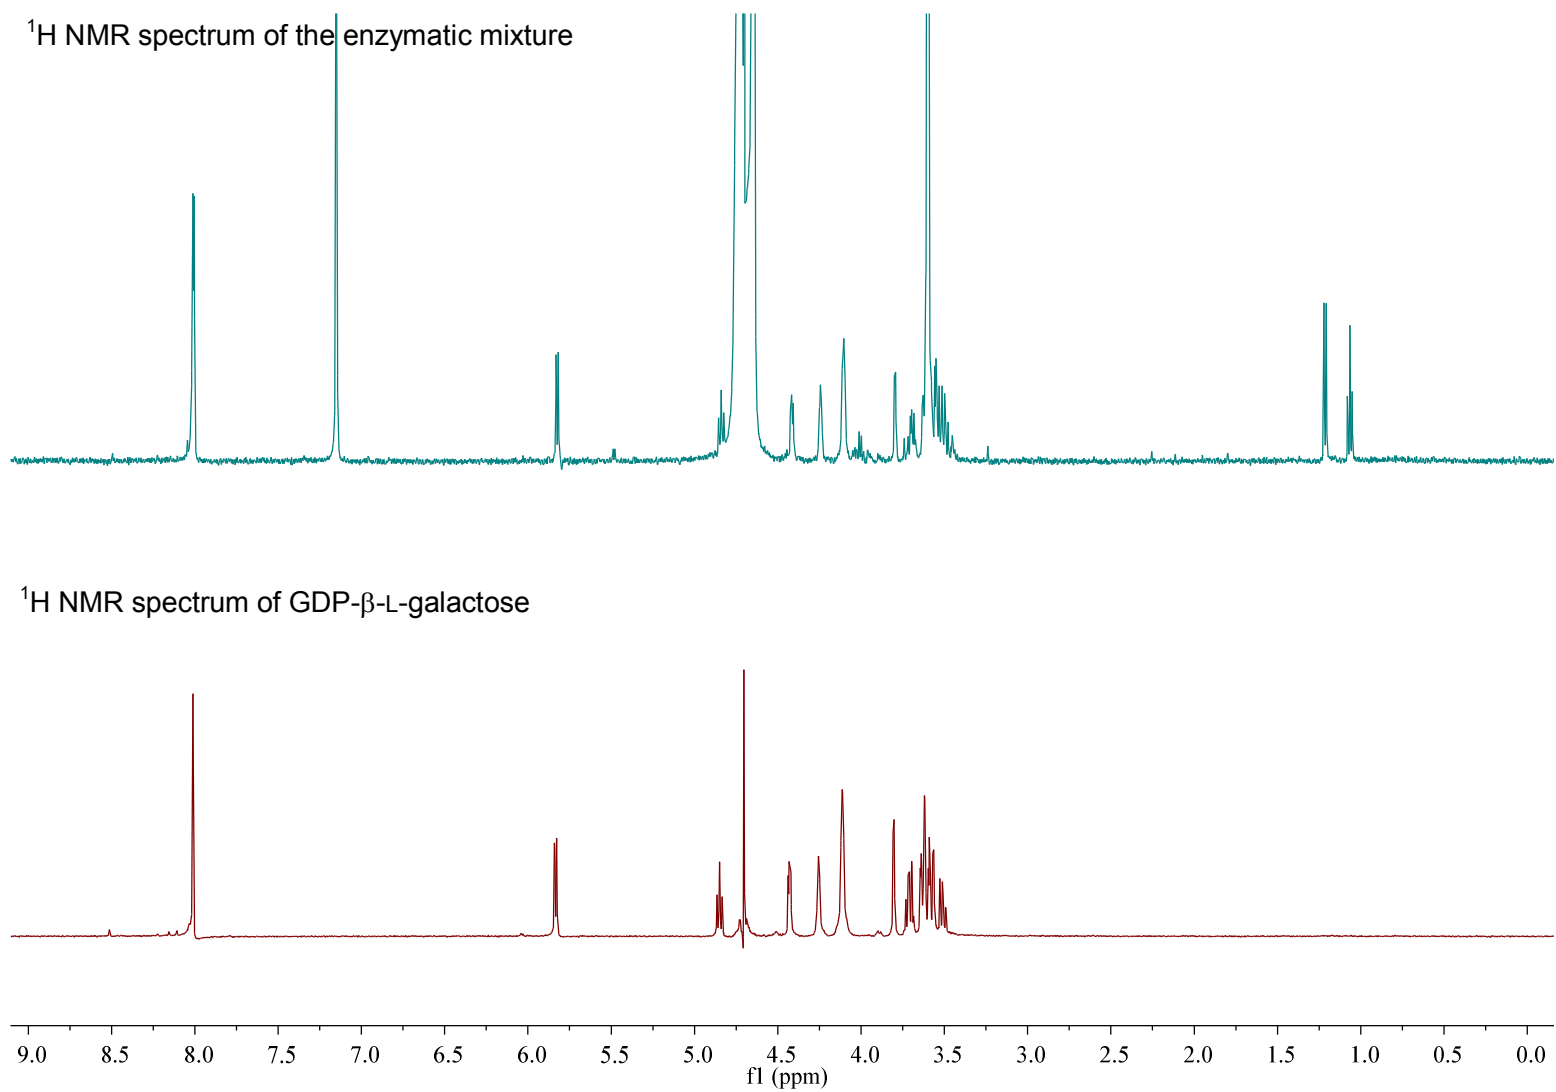

**Fig. S87.**  $^1\text{H}$  NMR (500 MHz) spectra of MtdL-mediated enzymatic mixture and GDP- $\beta$ -L-galactose in  $\text{D}_2\text{O}$

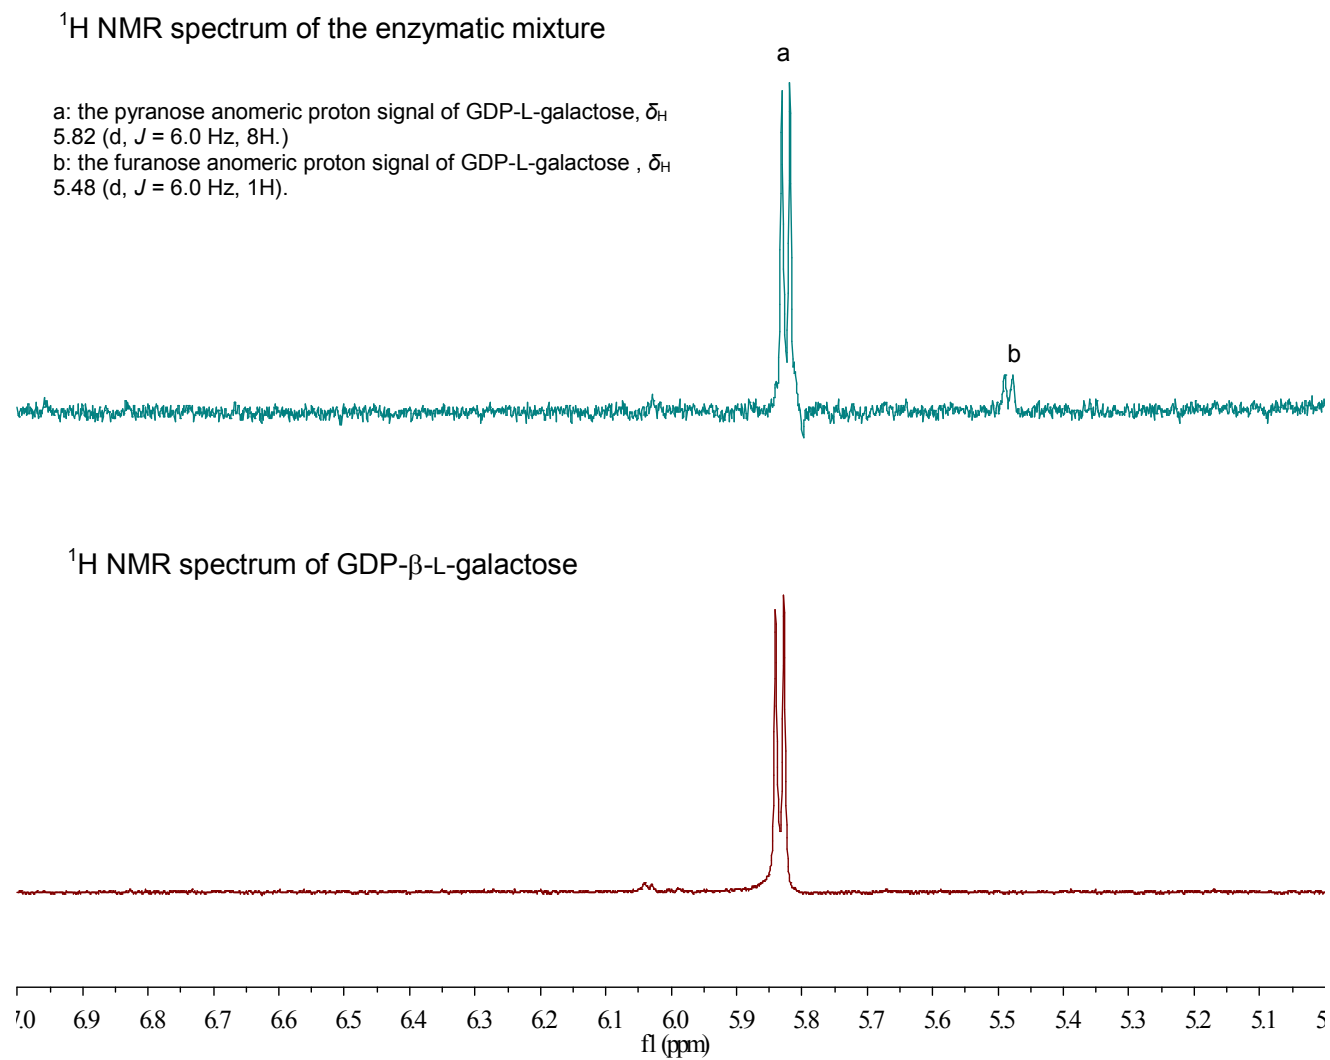

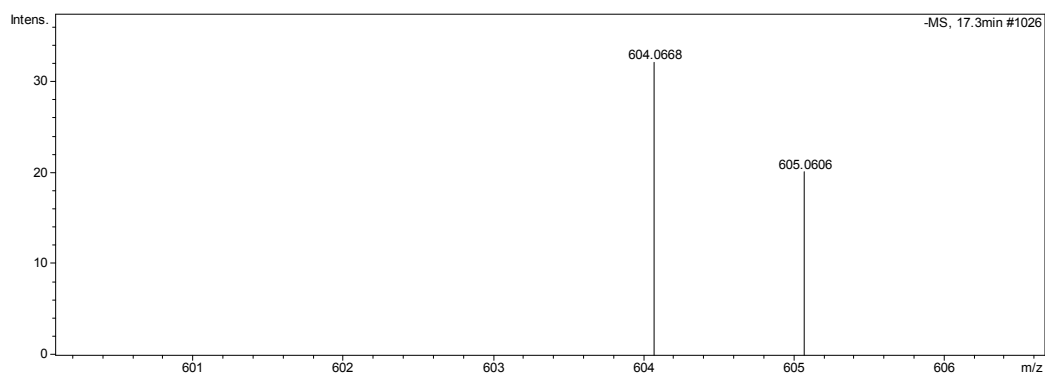

**Fig. S88.** The LC-MS analysis of MtdL-mediated enzymatic mixture.  
([M - H]<sup>-</sup> = 604.0668, calcd for C<sub>16</sub>H<sub>24</sub>N<sub>5</sub>O<sub>16</sub>P<sub>2</sub><sup>-</sup>, 604.0699, err 5.0 ppm)

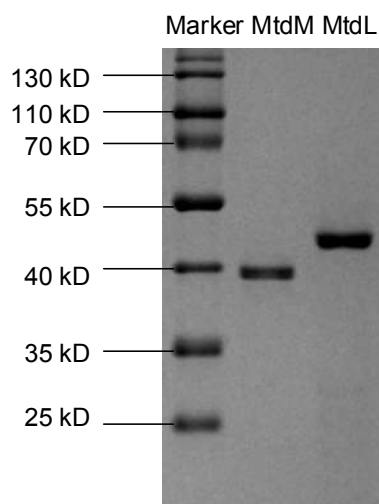

**Fig. S89.** SDS-PAGE for MtdM and MtdL

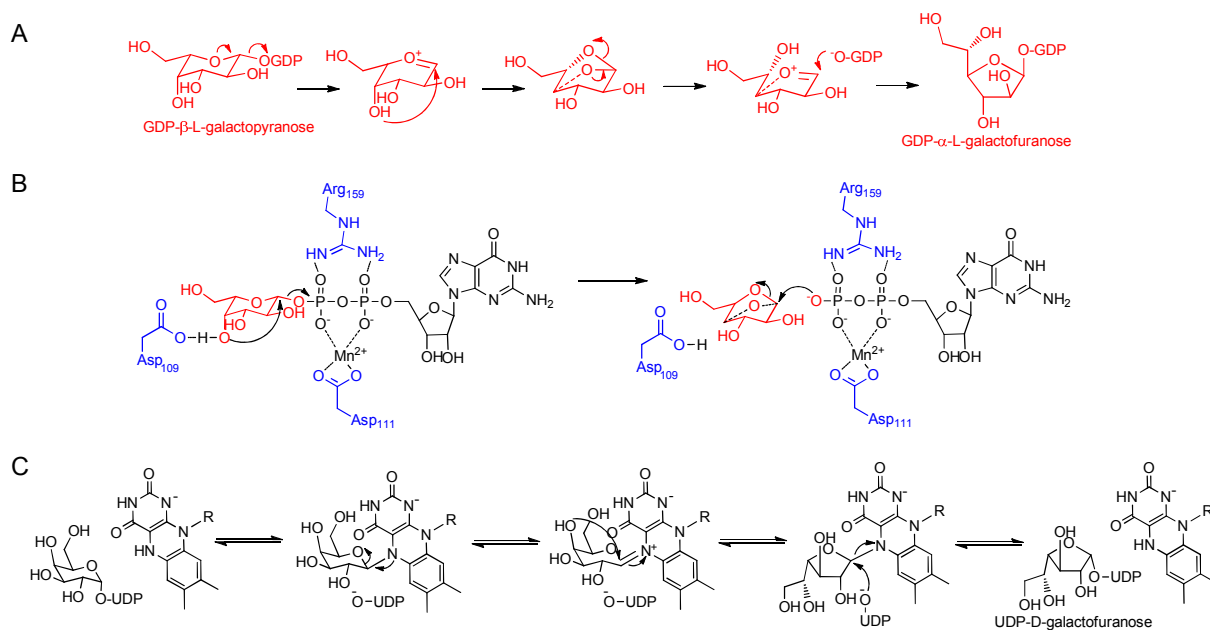

**Fig. S90.** Plausible chemical mechanisms for MtdL and UGM. (A) Mechanism involving bond cleavage and formation *en route* to GDP- $\alpha$ -L-galactofuranose. (B) MtdL mediates flavin-independent GDP- $\beta$ -L-galactose pyranose–furanose transformation. (C) UGM mediates flavin-dependent UDP-Galp and UDP-Galf transformation. Nucleophilic attack by the reduced flavin leads to a flavin-galactose adduct. Sugar ring contraction occurs by attack of the C<sub>4</sub> hydroxyl to the C<sub>1</sub>-carbon.

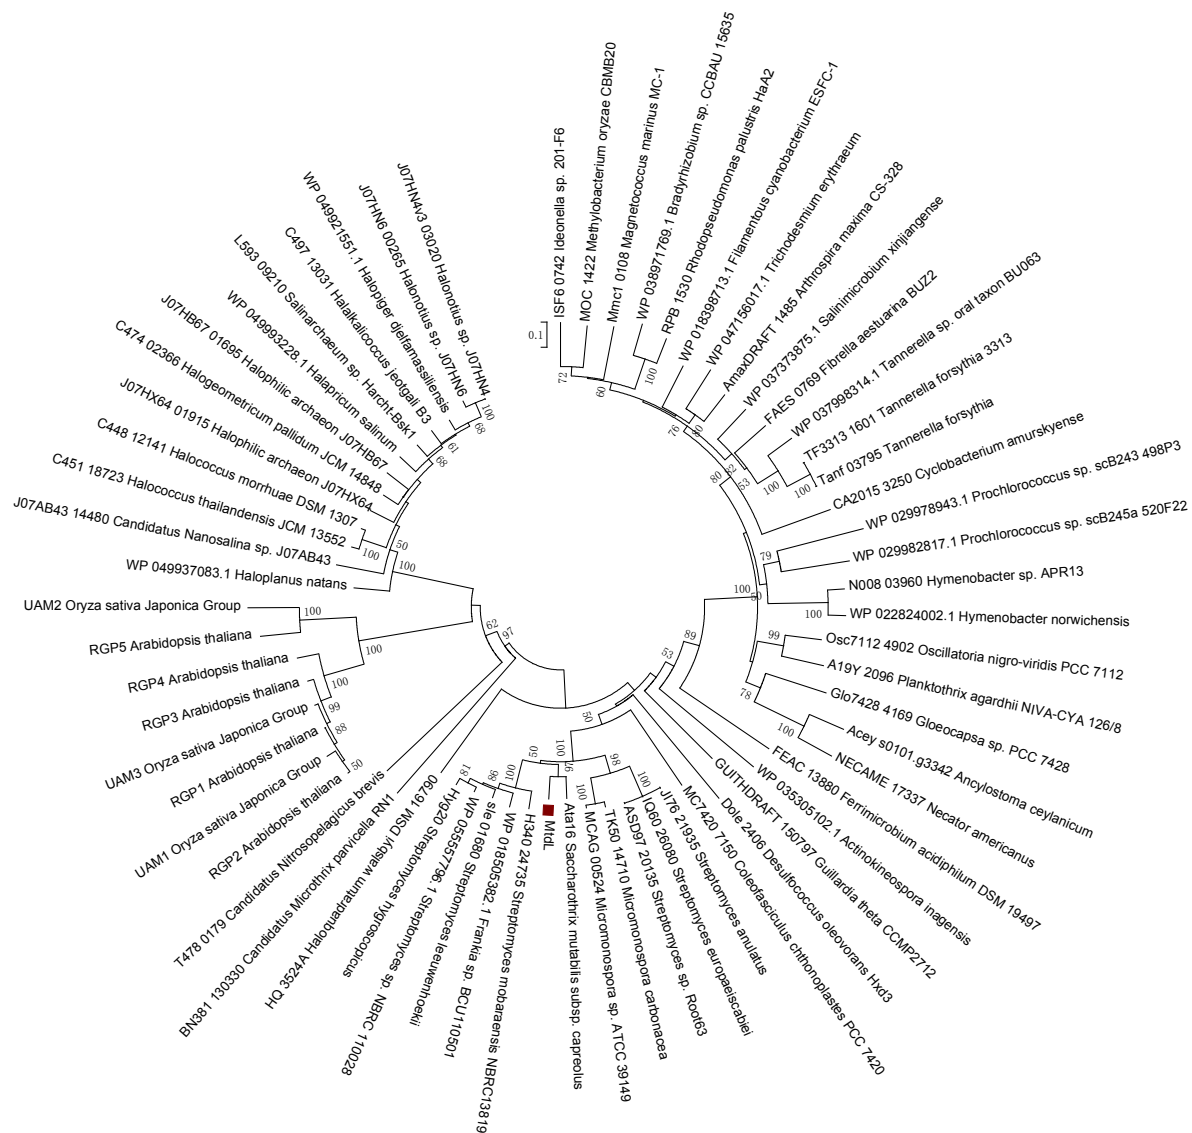

**Fig. S91.** Phylogenetic tree of MtdL with its homologues. The amino acid sequences were aligned using ClustalW and the phylogenetic tree was generated using Molecular Evolutionary Genetics Analysis (MEGA) 6.0.



## Supplementary References

- (1) Zhu Q, et al. (2012) Discovery and engineered overproduction of antimicrobial nucleoside antibiotic A201A from the deep-sea marine actinomycete *Marinactinospora thermotolerans* SCSIO 00652. *Antimicrob Agents Chemother* 56(1): 110–114.
- (2) Ma J, et al. (2012) Characterization of a single gene cluster responsible for methylpendolmycin and pendolmycin biosynthesis in the deep sea bacterium *Marinactinospora thermotolerans*. *Chembiochem* 13(4): 547–552.
- (3) Zhang Y, et al. (2013) Identification of the grincamycin gene cluster unveils divergent roles for GcnQ in different hosts, tailoring the L-rhodinose moiety. *Org Lett* 15(13): 3254–3257.
- (4) Gust B, Kieser T, Chater KF (2002) REDIRECT technology: PCR-targeting system in *Streptomyces coelicolor*. The John Innes Centre, Norwich, United Kingdom.
- (5) Kirst HA, et al. (1985) The structure of A201A, a novel nucleoside antibiotic. *J Antibiot (Tokyo)* 38(5): 575–586.
- (6) Costantino V, et al. (2008) Corrugoside, a new immunostimulatory  $\alpha$ -galactoglycosphingolipid from the marine sponge *Axinella corrugata*. *Bioorg Med Chem* 16(4): 2077–2085.
- (7) Costantino V, Fattorusso E, Imperatore C, Mangoni A (2004) Glycolipids from sponges. 13. Clarhamnoside, the first rhamnosylated  $\alpha$ -galactosylceramide from *Agelas clathrodes*. Improving spectral strategies for glycoconjugate structure determination. *J Org Chem* 69(4): 1174–1179.
- (8) Wikler MA (2003) Methods for dilution antimicrobial susceptibility tests for bacteria that grow aerobically; Approved Standard—Eighth Edition.
- (9) Hopwood DA, Kieser T, Wright HM, Bibb MJ (1983) Plasmids, recombination and chromosome mapping in *Streptomyces lividans* 66. *J Gen Microbiol* 129(7): 2257–2269.
